# Supplementary material for: Pseudomonas putida as saviour for troubled Synechococcus elongatus in a synthetic co-culture – Interaction studies based on a multi-OMICs approach
Source: Research Square preprint supplement (doi:10.21203/rs.3.rs-3234880/v1), 2023-08-08
Supplement: Supplementary file 1 [file Coculture_VS_Pputida_foldchange_27032023.xlsx]

## Sheet: coculture_VS_Pputida foldchange
gene_id	log2_foldChange	p_value	adj_p_value	gene_name	gene_product
gene-M8001_RS00825	0.0441406	0.954631	0.993395	NA	NA
gene-M8001_RS00835	0.607883	0.265065	0.644491	NA	NA
gene-M8001_RS00845	-0.684772	0.0813702	0.389175	NA	NA
gene-M8001_RS01525	0.27367	0.608057	0.875046	NA	NA
gene-M8001_RS02305	0.489774	0.260301	0.639738	NA	NA
gene-M8001_RS02310	0.264139	0.791449	0.940899	NA	NA
gene-M8001_RS02315	-0.622957	0.154165	0.52304	NA	NA
gene-M8001_RS02335	-0.243637	0.487022	0.815108	NA	NA
gene-M8001_RS02340	-0.669609	0.0546799	0.321531	NA	NA
gene-M8001_RS02345	-1.09262	0.00125965	0.0280899	NA	NA
gene-M8001_RS02355	-0.602908	0.0905042	0.407113	NA	NA
gene-M8001_RS02630	0.101061	0.862731	0.966382	NA	NA
gene-M8001_RS03160	1.81838	0.0849901	0.393853	NA	NA
gene-M8001_RS03165	-0.534015	0.159502	0.52978	NA	NA
gene-M8001_RS03170	-0.333797	0.398013	0.75786	NA	NA
gene-M8001_RS03175	-0.481205	0.393184	0.752768	NA	NA
gene-M8001_RS03180	-0.0725853	0.941114	0.988375	NA	NA
gene-M8001_RS03330	-0.50209	0.188862	0.561208	NA	NA
gene-M8001_RS03335	-0.617387	0.134911	0.486165	NA	NA
gene-M8001_RS03340	-0.888602	0.13973	0.495656	NA	NA
gene-M8001_RS03350	-1.1212	0.0532987	0.315709	NA	NA
gene-M8001_RS03405	0.157068	0.61193	0.875854	NA	NA
gene-M8001_RS03880	-0.751417	0.0322222	0.246533	NA	NA
gene-M8001_RS04425	-1.08457	0.0409068	0.280086	NA	NA
gene-M8001_RS06045	-0.465762	0.299861	0.674428	NA	NA
gene-M8001_RS06055	-0.0588608	1	1	NA	NA
gene-M8001_RS06275	-0.501124	0.29004	0.667297	NA	NA
gene-M8001_RS06280	0.269946	0.828049	0.955286	NA	NA
gene-M8001_RS06285	0.0635474	1	1	NA	NA
gene-M8001_RS06485	0.496002	0.264468	0.644254	NA	NA
gene-M8001_RS06915	0.0640591	0.86852	0.967792	NA	NA
gene-M8001_RS07325	-0.366465	0.460881	0.800259	NA	NA
gene-M8001_RS08830	-0.663832	0.210478	0.584444	NA	NA
gene-M8001_RS08840	-1.4521	0.00555706	0.0803234	NA	NA
gene-M8001_RS09570	-1.78702	4.06516e-06	0.000321394	NA	NA
gene-M8001_RS09735	-0.509529	0.163856	0.534376	NA	NA
gene-M8001_RS09740	-0.402789	0.223804	0.597039	NA	NA
gene-M8001_RS09745	-0.581696	0.0946223	0.414946	NA	NA
gene-M8001_RS09750	-0.947415	0.013738	0.142376	NA	NA
gene-M8001_RS09755	-1.06901	0.0276671	0.223057	NA	NA
gene-M8001_RS10295	-0.454015	0.276287	0.656198	NA	NA
gene-M8001_RS10325	-0.158386	0.617251	0.877095	NA	NA
gene-M8001_RS10330	-0.110831	0.734143	0.921669	NA	NA
gene-M8001_RS10335	-0.548023	0.157461	0.528382	NA	NA
gene-M8001_RS10340	-0.680324	0.0626491	0.342694	NA	NA
gene-M8001_RS10345	-0.933901	0.00647505	0.0886792	NA	NA
gene-M8001_RS10350	-1.43342	0.00245315	0.0460451	NA	NA
gene-M8001_RS10475	0.0599032	0.886689	0.972512	NA	NA
gene-M8001_RS10480	0.167348	0.640975	0.887038	NA	NA
gene-M8001_RS10485	-0.460416	0.191551	0.562767	NA	NA
gene-M8001_RS10490	-0.721078	0.0867429	0.395917	NA	NA
gene-M8001_RS11100	0.868649	0.0688408	0.360759	NA	NA
gene-M8001_RS11715	-0.618682	0.0992961	0.423205	NA	NA
gene-M8001_RS11720	-0.544404	0.122553	0.465667	NA	NA
gene-M8001_RS11870	-0.860779	0.00638889	0.087961	NA	NA
gene-M8001_RS11875	-0.896329	0.00807948	0.102576	NA	NA
gene-M8001_RS11880	-1.40041	4.97426e-05	0.00227681	NA	NA
gene-M8001_RS12095	-0.496138	0.091536	0.410484	NA	NA
gene-M8001_RS12370	-0.772052	0.0439914	0.289774	NA	NA
gene-M8001_RS12865	-0.0361606	0.932239	0.985866	NA	NA
gene-M8001_RS12990	0.230642	0.43593	0.781813	NA	NA
gene-M8001_RS20130	-0.697472	0.0700318	0.362813	NA	NA
gene-M8001_RS20585	-0.386301	0.256407	0.634403	NA	NA
gene-M8001_RS20935	-0.942528	0.0130643	0.138555	NA	NA
gene-M8001_RS21475	-0.522775	0.359118	0.726309	NA	NA
gene-M8001_RS22380	-0.562189	0.107019	0.438324	NA	NA
gene-M8001_RS23440	-0.435267	0.17202	0.544541	NA	NA
gene-M8001_RS23465	-0.726241	0.0195825	0.178952	NA	NA
gene-M8001_RS23470	-0.584279	0.0603751	0.33766	NA	NA
gene-M8001_RS23475	-0.463879	0.138312	0.493309	NA	NA
gene-M8001_RS23480	-0.458567	0.13381	0.48454	NA	NA
gene-M8001_RS23485	-0.348888	0.282466	0.659457	NA	NA
gene-M8001_RS24560	-0.44956	0.246169	0.623911	NA	NA
gene-M8001_RS24565	-1.27355	0.0677053	0.358302	NA	NA
gene-M8001_RS24570	-0.0393775	0.930382	0.985185	NA	NA
gene-M8001_RS24575	-0.268227	0.486535	0.815108	NA	NA
gene-M8001_RS24790	-0.778875	0.0455294	0.293888	NA	NA
gene-M8001_RS24795	-0.7178	0.0684075	0.360192	NA	NA
gene-M8001_RS24925	-0.0109082	0.97657	0.999694	NA	NA
gene-M8001_RS25685	-0.519768	0.145864	0.50775	NA	NA
gene-M8001_RS25690	-0.792586	0.0315298	0.243737	NA	NA
gene-M8001_RS27330	1.16147	0.0165571	0.162321	NA	NA
gene-M8001_RS21020	-0.717664	0.0584319	0.334207	WP_002553999.1	translation initiation factor IF-1
gene-M8001_RS02530	0.260176	0.543719	0.846145	WP_002555468.1	50S ribosomal protein L36
gene-M8001_RS02475	0.807086	0.11204	0.446034	WP_002555479.1	50S ribosomal protein L14
gene-M8001_RS02465	0.716711	0.13374	0.48454	WP_002555481.1	50S ribosomal protein L29
gene-M8001_RS27495	-1.54705	0.000179669	0.00612754	WP_002555808.1	P-II family nitrogen regulator
gene-M8001_RS28475	-0.441886	0.29916	0.67378	WP_003097235.1	F0F1 ATP synthase subunit C
gene-M8001_RS02450	0.387824	0.391429	0.752768	WP_003103908.1	50S ribosomal protein L22
gene-M8001_RS01980	0.7531	0.207331	0.580393	WP_003177654.1	YqaE/Pmp3 family membrane protein
gene-M8001_RS02420	-0.115532	0.804735	0.944525	WP_003186070.1	30S ribosomal protein S10
gene-M8001_RS02015	0.243086	0.505967	0.826448	WP_003243383.1	pyrroloquinoline quinone precursor peptide PqqA
gene-M8001_RS14070	-1.84486	0.00276241	0.0495336	WP_003243383.1	pyrroloquinoline quinone precursor peptide PqqA
gene-M8001_RS02405	0.0167211	0.96971	0.997019	WP_003246741.1	30S ribosomal protein S7
gene-M8001_RS09720	-0.202011	0.499832	0.823393	WP_003247104.1	ATP-binding protein
gene-M8001_RS09725	-0.0258706	0.923265	0.983183	WP_003247105.1	GAF domain-containing protein
gene-M8001_RS09880	-0.390897	0.201076	0.574474	WP_003247142.1	Trm112 family protein
gene-M8001_RS09930	-0.181685	0.666714	0.898651	WP_003247154.1	50S ribosomal protein L32
gene-M8001_RS09945	-0.180495	0.628724	0.882952	WP_003247160.1	3-oxoacyl-ACP reductase FabG
gene-M8001_RS10275	-0.428151	0.208001	0.581333	WP_003247170.1	TetR/AcrR family transcriptional regulator
gene-M8001_RS10365	0.0145914	0.963815	0.995405	WP_003247186.1	acyl-CoA thioesterase
gene-M8001_RS10405	0.264624	0.431693	0.7807	WP_003247194.1	3-isopropylmalate dehydrogenase
gene-M8001_RS10410	0.0882464	0.799217	0.943368	WP_003247195.1	aspartate-semialdehyde dehydrogenase
gene-M8001_RS10460	-0.207735	0.585992	0.866182	WP_003247207.1	amidophosphoribosyltransferase
gene-M8001_RS10540	-0.0168211	0.959064	0.993485	WP_003247220.1	NAD(+) kinase
gene-M8001_RS10555	-0.225675	0.439398	0.784602	WP_003247224.1	DUF1315 family protein
gene-M8001_RS10560	-0.0772828	0.802869	0.944525	WP_003247225.1	DUF2797 domain-containing protein
gene-M8001_RS10590	0.554297	0.129991	0.479019	WP_003247232.1	hypothetical protein
gene-M8001_RS10645	-0.129899	0.658879	0.894622	WP_003247242.1	MoxR family ATPase
gene-M8001_RS10670	1.11303	0.0582621	0.334102	WP_003247249.1	aldolase
gene-M8001_RS10690	-0.348333	0.261388	0.639738	WP_003247253.1	LysR family transcriptional regulator
gene-M8001_RS10760	0.579047	0.0743696	0.372777	WP_003247268.1	LysR family transcriptional regulator
gene-M8001_RS10785	-0.405207	0.358347	0.72565	WP_003247275.1	CsbD family protein
gene-M8001_RS10790	1.13298	0.00924646	0.111427	WP_003247276.1	redox-sensitive transcriptional activator SoxR
gene-M8001_RS04195	-0.411737	0.265183	0.644491	WP_003247318.1	thioredoxin-disulfide reductase
gene-M8001_RS04185	0.242741	0.941464	0.988375	WP_003247320.1	DUF1851 domain-containing protein
gene-M8001_RS04155	0.171487	0.628038	0.882839	WP_003247325.1	peptidylprolyl isomerase
gene-M8001_RS04140	-0.147633	0.607088	0.874837	WP_003247328.1	OmpA family protein
gene-M8001_RS04115	0.556252	0.136563	0.489751	WP_003247330.1	response regulator
gene-M8001_RS04080	-0.0951146	0.776728	0.935371	WP_003247342.1	TMEM165/GDT1 family protein
gene-M8001_RS04045	0.0441955	1	1	WP_003247353.1	hypothetical protein
gene-M8001_RS04025	-0.0528467	0.872782	0.968811	WP_003247360.1	PA4642 family protein
gene-M8001_RS04020	0.233467	0.416522	0.772082	WP_003247361.1	hypothetical protein
gene-M8001_RS04005	-0.360703	0.28276	0.659457	WP_003247366.1	uracil phosphoribosyltransferase
gene-M8001_RS04000	-0.3825	0.263171	0.642899	WP_003247369.1	uracil-xanthine permease family protein
gene-M8001_RS03960	-0.0863827	0.770837	0.933665	WP_003247385.1	acyloxyacyl hydrolase
gene-M8001_RS03875	-0.687896	0.108964	0.441441	WP_003247410.1	ribose-phosphate pyrophosphokinase
gene-M8001_RS03865	-0.310302	0.516214	0.830846	WP_003247413.1	aminoacyl-tRNA hydrolase
gene-M8001_RS03860	-0.0839011	0.848519	0.962725	WP_003247414.1	redox-regulated ATPase YchF
gene-M8001_RS03770	-0.291505	0.601922	0.872938	WP_003247435.1	hypothetical protein
gene-M8001_RS03725	-0.602972	0.145652	0.50775	WP_003247449.1	Mks condensin complex protein MksB
gene-M8001_RS03720	-0.459295	0.223425	0.596857	WP_003247452.1	Mks condensin complex protein MksE
gene-M8001_RS03705	-0.00704185	0.98396	1	WP_003247458.1	glutamate 5-kinase
gene-M8001_RS03700	-0.00275303	0.994938	1	WP_003247460.1	Obg family GTPase CgtA
gene-M8001_RS03695	0.0507935	0.912496	0.979087	WP_003247464.1	50S ribosomal protein L27
gene-M8001_RS03690	-0.130161	0.78828	0.939741	WP_003247466.1	50S ribosomal protein L21
gene-M8001_RS03670	-0.0907063	0.842675	0.960738	WP_003247482.1	FKBP-type peptidyl-prolyl cis-trans isomerase
gene-M8001_RS03660	-0.0785031	0.768716	0.933044	WP_003247486.1	TIGR00645 family protein
gene-M8001_RS03645	-0.326249	0.385217	0.748303	WP_003247492.1	DUF3015 domain-containing protein
gene-M8001_RS03635	-0.350252	0.295565	0.671444	WP_003247495.1	lipoprotein
gene-M8001_RS03625	0.0133037	0.991182	1	WP_003247498.1	NADP-specific glutamate dehydrogenase
gene-M8001_RS03605	-0.0996975	0.801677	0.944278	WP_003247505.1	serine hydroxymethyltransferase
gene-M8001_RS03365	0.549243	0.0959377	0.414971	WP_003247546.1	DUF1780 domain-containing protein
gene-M8001_RS03355	-0.619292	0.0370772	0.268361	WP_003247549.1	NAD(P)/FAD-dependent oxidoreductase
gene-M8001_RS03310	-0.671338	0.0394907	0.274834	WP_003247556.1	outer membrane protein assembly factor BamD
gene-M8001_RS03290	-0.401225	0.40235	0.760399	WP_003247565.1	branched-chain amino acid ABC transporter permease
gene-M8001_RS03285	-0.216882	0.622412	0.87947	WP_003247567.1	branched-chain amino acid ABC transporter permease
gene-M8001_RS03220	0.11513	0.757386	0.928904	WP_003247609.1	signal peptidase II
gene-M8001_RS03200	-0.500222	0.253707	0.631304	WP_003247625.1	30S ribosomal protein S20
gene-M8001_RS18925	-0.0561063	0.902825	0.977698	WP_003247665.1	hypothetical protein
gene-M8001_RS18865	0.236155	0.423369	0.774336	WP_003247694.1	FadR family transcriptional regulator
gene-M8001_RS18850	0.706821	0.0286022	0.227857	WP_003247701.1	MFS transporter
gene-M8001_RS18825	0.220316	0.764609	0.930656	WP_003247716.1	ABC transporter permease subunit
gene-M8001_RS18820	1.25824	0.0092218	0.111387	WP_003247720.1	ABC transporter permease subunit
gene-M8001_RS18800	0.280368	0.411133	0.767596	WP_003247729.1	aspartate/tyrosine/aromatic aminotransferase
gene-M8001_RS18795	-0.467516	0.14825	0.512489	WP_003247731.1	serine/threonine transporter
gene-M8001_RS18750	1.30677	0.000652724	0.0171151	WP_003247746.1	DUF1652 domain-containing protein
gene-M8001_RS18745	0.916775	0.0092044	0.111387	WP_003247748.1	DUF1345 domain-containing protein
gene-M8001_RS18690	0.703489	0.0760245	0.375303	WP_003247774.1	hypothetical protein
gene-M8001_RS18650	-0.192792	0.532984	0.838247	WP_003247790.1	LysR family transcriptional regulator
gene-M8001_RS18545	0.414531	0.230401	0.603531	WP_003247847.1	MerR family DNA-binding transcriptional regulator
gene-M8001_RS18500	0.873397	0.00723195	0.0948149	WP_003247865.1	bifunctional allantoicase/(S)-ureidoglycine aminohydrolase
gene-M8001_RS18470	0.108402	0.685746	0.904673	WP_003247877.1	PLDc N-terminal domain-containing protein
gene-M8001_RS18370	-1.10434	0.00314584	0.0549092	WP_003247923.1	hypothetical protein
gene-M8001_RS15080	-0.516703	0.104115	0.433578	WP_003248033.1	cupin domain-containing protein
gene-M8001_RS15150	-0.157938	0.586142	0.866182	WP_003248064.1	hypothetical protein
gene-M8001_RS15290	-0.61979	0.191635	0.562767	WP_003248123.1	saccharopine dehydrogenase family protein
gene-M8001_RS15295	-0.447361	0.240843	0.617556	WP_003248125.1	carboxynorspermidine decarboxylase
gene-M8001_RS15465	0.476329	0.19722	0.569505	WP_003248200.1	AraC family transcriptional regulator
gene-M8001_RS16075	0.615328	0.050445	0.310829	WP_003248318.1	peptidylprolyl isomerase
gene-M8001_RS16170	-0.986393	0.00308277	0.0541612	WP_003248350.1	type VI secretion system baseplate subunit TssG
gene-M8001_RS16180	-1.01227	0.00579744	0.0826532	WP_003248355.1	type VI secretion system baseplate subunit TssE
gene-M8001_RS16185	-0.820964	0.0437161	0.288747	WP_003248356.1	type VI secretion system contractile sheath large subunit
gene-M8001_RS16200	-0.0649483	0.915774	0.980198	WP_003248365.1	hypothetical protein
gene-M8001_RS16230	-0.318961	0.497143	0.822477	WP_003248379.1	hypothetical protein
gene-M8001_RS16235	-0.114439	0.737475	0.922115	WP_003248382.1	polymorphic toxin type 46 domain-containing protein
gene-M8001_RS16290	-0.932482	0.00376853	0.0616075	WP_003248404.1	DUF1795 domain-containing protein
gene-M8001_RS04630	-0.546983	0.241041	0.617556	WP_003248481.1	peptide chain release factor 3
gene-M8001_RS04625	-0.137304	0.796525	0.942682	WP_003248483.1	ABC transporter permease
gene-M8001_RS04595	0.227969	0.668313	0.898805	WP_003248496.1	sigma-70 family RNA polymerase sigma factor
gene-M8001_RS04590	-0.554875	0.120177	0.460538	WP_003248498.1	type III PLP-dependent enzyme
gene-M8001_RS04580	-0.0519295	1	1	WP_003248502.1	Fe2+-dependent dioxygenase
gene-M8001_RS04560	0.0117453	0.980875	1	WP_003248511.1	pyridoxal phosphate-dependent aminotransferase
gene-M8001_RS04545	-0.0270108	0.939086	0.988313	WP_003248514.1	tetratricopeptide repeat protein
gene-M8001_RS04540	-0.149549	0.673645	0.90038	WP_003248516.1	histidine--tRNA ligase
gene-M8001_RS04515	-0.221172	0.590278	0.866648	WP_003248526.1	nucleoside-diphosphate kinase
gene-M8001_RS04510	0.52617	0.0760028	0.375303	WP_003248529.1	Fe-S cluster assembly protein IscX
gene-M8001_RS04505	0.557908	0.0673514	0.357154	WP_003248531.1	ISC system 2Fe-2S type ferredoxin
gene-M8001_RS04490	0.374136	0.270506	0.649165	WP_003248536.1	iron-sulfur cluster assembly protein IscA
gene-M8001_RS04485	0.326595	0.351142	0.721645	WP_003248539.1	Fe-S cluster assembly scaffold IscU
gene-M8001_RS04480	0.0760999	0.83402	0.957571	WP_003248541.1	IscS subfamily cysteine desulfurase
gene-M8001_RS04475	-0.0147399	0.966711	0.996443	WP_003248542.1	Fe-S cluster assembly transcriptional regulator IscR
gene-M8001_RS04460	-0.595262	0.114053	0.450077	WP_003248548.1	inositol-phosphate phosphatase
gene-M8001_RS04440	-0.143001	0.713038	0.913255	WP_003248556.1	preprotein translocase subunit YajC
gene-M8001_RS04435	-0.377587	0.383554	0.747456	WP_003248558.1	tRNA guanosine(34) transglycosylase Tgt
gene-M8001_RS04410	0.757053	0.0156503	0.156144	WP_003248566.1	putative addiction module antidote protein
gene-M8001_RS04360	0.235573	0.417466	0.772551	WP_003248588.1	GNAT family N-acetyltransferase
gene-M8001_RS04355	0.020692	1	1	WP_003248590.1	YkgJ family cysteine cluster protein
gene-M8001_RS04340	0.942603	0.0294793	0.234129	WP_003248596.1	heme o synthase
gene-M8001_RS04335	0.967328	0.042534	0.285273	WP_003248599.1	cytochrome o ubiquinol oxidase subunit IV
gene-M8001_RS04320	0.165345	0.718042	0.915233	WP_003248605.1	ubiquinol oxidase subunit II
gene-M8001_RS04315	-0.203149	0.494886	0.821347	WP_003248609.1	disulfide bond formation protein B
gene-M8001_RS10900	-0.188719	0.601045	0.872424	WP_003248638.1	phosphoenolpyruvate synthase
gene-M8001_RS10915	0.306749	0.38056	0.745685	WP_003248655.1	zinc transporter ZntB
gene-M8001_RS10930	-0.682156	0.0893068	0.403815	WP_003248665.1	RNA polymerase sigma factor SigX
gene-M8001_RS10955	-1.86577	1.5023e-05	0.000861429	WP_003248677.1	ANTAR domain-containing protein
gene-M8001_RS10970	0.574702	0.182785	0.553063	WP_003248687.1	ribosome modulation factor
gene-M8001_RS10990	-0.29415	0.444748	0.788215	WP_003248695.1	YggL family protein
gene-M8001_RS11075	-0.344681	0.216902	0.589783	WP_003248727.1	sulfurtransferase TusA
gene-M8001_RS11085	1.32513	0.0110001	0.12478	WP_003248731.1	hypothetical protein
gene-M8001_RS11105	0.287095	0.345492	0.716301	WP_003248738.1	YgdI/YgdR family lipoprotein
gene-M8001_RS11115	-0.0640793	0.826926	0.955286	WP_003248742.1	molybdopterin molybdotransferase MoeA
gene-M8001_RS11160	-0.413015	0.351677	0.721784	WP_003248759.1	ATP-binding cassette domain-containing protein
gene-M8001_RS11170	0.0481999	0.917268	0.980198	WP_003248762.1	hypothetical protein
gene-M8001_RS11190	-0.119428	0.680605	0.904584	WP_003248769.1	DUF1653 domain-containing protein
gene-M8001_RS11195	-0.292355	0.411121	0.767596	WP_003248770.1	type I DNA topoisomerase
gene-M8001_RS11200	0.153615	0.59367	0.869849	WP_003248773.1	hypothetical protein
gene-M8001_RS11205	0.0494088	0.874958	0.968811	WP_003248777.1	hypothetical protein
gene-M8001_RS11260	-0.0137945	0.951232	0.991516	WP_003248799.1	glycerophosphodiester phosphodiesterase
gene-M8001_RS11305	0.630951	0.0704297	0.363145	WP_003248815.1	DUF4404 family protein
gene-M8001_RS11420	-0.409972	0.219229	0.592099	WP_003248857.1	ProQ/FinO family protein
gene-M8001_RS11460	-0.170861	0.577692	0.862189	WP_003248880.1	hypothetical protein
gene-M8001_RS27165	0.430979	0.320412	0.69721	WP_003248957.1	sulfur starvation response protein OscA
gene-M8001_RS27145	0.162919	0.584891	0.865805	WP_003248965.1	sulfate ABC transporter ATP-binding protein
gene-M8001_RS27080	-0.0545389	0.882299	0.971307	WP_003248995.1	phosphoglycerate dehydrogenase
gene-M8001_RS27055	0.000380825	0.994402	1	WP_003249004.1	ribose-5-phosphate isomerase RpiA
gene-M8001_RS27035	-0.215618	0.481967	0.812308	WP_003249017.1	RNA pyrophosphohydrolase
gene-M8001_RS27030	-0.112534	0.755107	0.92884	WP_003249020.1	phosphoenolpyruvate--protein phosphotransferase
gene-M8001_RS27020	-0.272769	0.345066	0.716301	WP_003249024.1	sulfite exporter TauE/SafE family protein
gene-M8001_RS26920	-0.292353	0.330776	0.705587	WP_003249063.1	YfhL family 4Fe-4S dicluster ferredoxin
gene-M8001_RS26850	-0.430406	0.166718	0.53746	WP_003249079.1	cell division ATP-binding protein FtsE
gene-M8001_RS26840	-0.0974957	0.787086	0.93945	WP_003249083.1	RNA polymerase sigma factor RpoH
gene-M8001_RS26825	-0.296217	0.343928	0.71593	WP_003249090.1	sulfur carrier protein ThiS
gene-M8001_RS26820	-0.266819	0.46183	0.800259	WP_003249091.1	thiazole synthase
gene-M8001_RS26810	0.12007	0.665253	0.897928	WP_003249095.1	DUF3392 family protein
gene-M8001_RS26790	-0.572074	0.0948786	0.414946	WP_003249106.1	methionine biosynthesis protein MetW
gene-M8001_RS26780	-0.0443626	0.880831	0.970271	WP_003249110.1	YggT family protein
gene-M8001_RS26750	-0.322469	0.306224	0.681799	WP_003249122.1	SPOR domain-containing protein
gene-M8001_RS26735	-0.0303368	0.943209	0.988611	WP_003249127.1	50S ribosomal protein L31
gene-M8001_RS26675	0.532924	0.271977	0.650401	WP_003249156.1	FAD-dependent oxidoreductase
gene-M8001_RS26615	-0.0153203	0.954213	0.993395	WP_003249182.1	betaine-aldehyde dehydrogenase
gene-M8001_RS26590	-0.514233	0.0741807	0.372479	WP_003249191.1	divergent polysaccharide deacetylase family protein
gene-M8001_RS26565	-0.581317	0.0755573	0.375303	WP_003249204.1	glutaredoxin 3
gene-M8001_RS26560	-0.39321	0.279834	0.657138	WP_003249206.1	protein-export chaperone SecB
gene-M8001_RS26555	-0.434332	0.178533	0.550331	WP_003249209.1	tRNA (uridine(34)/cytosine(34)/5-carboxymethylaminomethyluridine(34)-2'-O)-methyltransferase TrmL
gene-M8001_RS26530	-1.26269	0.00705937	0.0936495	WP_003249219.1	type I glutamate--ammonia ligase
gene-M8001_RS26525	-0.723733	0.136527	0.489751	WP_003249221.1	tRNA 4-thiouridine(8) synthase ThiI
gene-M8001_RS26510	-0.599836	0.0595372	0.337549	WP_003249225.1	YkgJ family cysteine cluster protein
gene-M8001_RS26490	-0.0966965	0.795029	0.942189	WP_003249234.1	outer membrane protein assembly factor BamE
gene-M8001_RS26440	0.0604882	0.840173	0.960738	WP_003249260.1	prolyl aminopeptidase
gene-M8001_RS26435	0.0617424	0.823026	0.954202	WP_003249262.1	D-aminoacyl-tRNA deacylase
gene-M8001_RS26375	-0.13199	0.640069	0.887038	WP_003249283.1	phosphoribosyl-ATP diphosphatase
gene-M8001_RS26370	-0.200194	0.496054	0.821708	WP_003249284.1	phosphoribosyl-AMP cyclohydrolase
gene-M8001_RS26350	-0.0825484	0.775111	0.935165	WP_003249289.1	polyhydroxyalkanoic acid system family protein
gene-M8001_RS26305	0.796198	0.0111693	0.125645	WP_003249308.1	ATP-dependent protease ATPase subunit HslU
gene-M8001_RS26300	0.705589	0.0178363	0.16883	WP_003249309.1	ATP-dependent protease subunit HslV
gene-M8001_RS26290	-0.0655204	0.829413	0.956014	WP_003249311.1	aspartate carbamoyltransferase catalytic subunit
gene-M8001_RS26285	-0.148162	0.601233	0.872424	WP_003249313.1	bifunctional pyr operon transcriptional regulator/uracil phosphoribosyltransferase PyrR
gene-M8001_RS26275	0.025491	0.931377	0.985811	WP_003249318.1	YqgE/AlgH family protein
gene-M8001_RS26255	0.527109	0.0853338	0.394745	WP_003249327.1	twitching motility response regulator PilH
gene-M8001_RS26235	0.240778	0.572625	0.860345	WP_003249336.1	chemotaxis protein CheW
gene-M8001_RS26205	0.0287313	0.930261	0.985185	WP_003249350.1	YceI family protein
gene-M8001_RS26135	-0.168477	0.703443	0.909005	WP_003249375.1	methionine adenosyltransferase
gene-M8001_RS26130	-0.428176	0.279866	0.657138	WP_003249377.1	metalloregulator ArsR/SmtB family transcription factor
gene-M8001_RS26090	-0.057379	0.888005	0.973039	WP_003249394.1	M48 family metallopeptidase
gene-M8001_RS26055	-0.322469	0.271087	0.649165	WP_003249408.1	multidrug transporter subunit MdtD
gene-M8001_RS26015	-0.354485	0.338444	0.711835	WP_003249431.1	carbamoyltransferase
gene-M8001_RS25995	-0.263865	0.503205	0.824732	WP_003249439.1	glycosyltransferase
gene-M8001_RS25980	-0.681108	0.0341887	0.255217	WP_003249444.1	hypothetical protein
gene-M8001_RS25965	-0.236807	0.511789	0.829691	WP_003249449.1	bifunctional D-glycero-beta-D-manno-heptose-7-phosphate kinase/D-glycero-beta-D-manno-heptose 1-phosphate adenylyltransferase HldE
gene-M8001_RS25940	0.195897	0.67237	0.89941	WP_003249460.1	LysR family transcriptional regulator
gene-M8001_RS25895	-0.214296	0.465164	0.802871	WP_003249476.1	RsiV family protein
gene-M8001_RS25890	0.110392	0.706991	0.909979	WP_003249478.1	NUDIX domain-containing protein
gene-M8001_RS25885	0.0750854	0.787705	0.93945	WP_003249480.1	DUF1249 domain-containing protein
gene-M8001_RS25875	-0.200893	0.513598	0.830209	WP_003249484.1	esterase
gene-M8001_RS25820	0.908271	0.0168062	0.163001	WP_003249507.1	flagellar motor stator protein MotA
gene-M8001_RS25810	-0.1727	0.628836	0.882952	WP_003249512.1	small ribosomal subunit biogenesis GTPase RsgA
gene-M8001_RS25805	0.00639416	0.997229	1	WP_003249514.1	oligoribonuclease
gene-M8001_RS25800	0.216155	0.474304	0.808648	WP_003249516.1	trimeric intracellular cation channel family protein
gene-M8001_RS25790	0.0350621	0.905748	0.977698	WP_003249520.1	NAD(P)H-hydrate dehydratase
gene-M8001_RS25785	0.105484	0.71707	0.91519	WP_003249523.1	tRNA (adenosine(37)-N6)-threonylcarbamoyltransferase complex ATPase subunit type 1 TsaE
gene-M8001_RS25765	0.38547	0.248426	0.626831	WP_003249532.1	RNA chaperone Hfq
gene-M8001_RS25760	0.203602	0.568505	0.859047	WP_003249534.1	GTPase HflX
gene-M8001_RS25755	-0.0943182	0.793324	0.941452	WP_003249536.1	FtsH protease activity modulator HflK
gene-M8001_RS25750	-0.123603	0.731153	0.919979	WP_003249538.1	protease modulator HflC
gene-M8001_RS25740	0.280601	0.529725	0.83634	WP_003249542.1	adenylosuccinate synthase
gene-M8001_RS25695	-0.377491	0.240372	0.617556	WP_003249550.1	extracellular solute-binding protein
gene-M8001_RS25665	-0.28227	0.536363	0.841612	WP_003249557.1	30S ribosomal protein S6
gene-M8001_RS25660	-0.147009	0.758676	0.929288	WP_003249563.1	30S ribosomal protein S18
gene-M8001_RS25655	0.183694	0.701487	0.908569	WP_003249565.1	hypothetical protein
gene-M8001_RS25650	0.342199	0.476507	0.809379	WP_003249568.1	50S ribosomal protein L9
gene-M8001_RS25630	-2.32909	2.10127e-10	3.91587e-08	WP_003249580.1	azurin
gene-M8001_RS25615	-0.308153	0.387062	0.749143	WP_003249588.1	branched-chain amino acid ABC transporter substrate-binding protein
gene-M8001_RS25610	-0.562555	0.0699656	0.362813	WP_003249590.1	branched-chain amino acid ABC transporter permease
gene-M8001_RS25590	0.0408694	0.903144	0.977698	WP_003249597.1	SDR family oxidoreductase
gene-M8001_RS25575	-0.192276	0.558011	0.855499	WP_003249603.1	TetR family transcriptional regulator
gene-M8001_RS25555	1.05319	0.0524256	0.314185	WP_003249613.1	osmotically-inducible lipoprotein OsmE
gene-M8001_RS25485	-1.84491	6.96765e-05	0.00288549	WP_003249642.1	urea ABC transporter substrate-binding protein
gene-M8001_RS25460	-0.227258	0.461966	0.800259	WP_003249653.1	copper chaperone PCu(A)C
gene-M8001_RS25420	-0.234915	0.542985	0.845975	WP_003249670.1	precorrin-8X methylmutase
gene-M8001_RS25375	-0.568978	0.161817	0.532887	WP_003249687.1	bifunctional phosphoribosylaminoimidazolecarboxamide formyltransferase/IMP cyclohydrolase
gene-M8001_RS25370	-0.569964	0.0651805	0.352447	WP_003249693.1	DNA-binding transcriptional regulator Fis
gene-M8001_RS25305	-0.152974	0.688836	0.904694	WP_003249722.1	23S rRNA (pseudouridine(1915)-N(3))-methyltransferase RlmH
gene-M8001_RS25295	-0.114929	0.77372	0.934987	WP_003249727.1	rod shape-determining protein RodA
gene-M8001_RS25270	-0.386897	0.255114	0.633115	WP_003249738.1	lipoyl(octanoyl) transferase LipB
gene-M8001_RS25265	-0.11303	0.756068	0.92884	WP_003249742.1	lipoyl synthase
gene-M8001_RS25250	0.240304	0.760201	0.929841	WP_003249747.1	ribosome alternative rescue factor ArfA
gene-M8001_RS25245	-0.126898	0.698826	0.908498	WP_003249749.1	DNA polymerase III subunit delta
gene-M8001_RS25210	-0.0351866	0.916999	0.980198	WP_003249762.1	HlyC/CorC family transporter
gene-M8001_RS25195	-0.549841	0.0921358	0.410484	WP_003249769.1	DUF1820 family protein
gene-M8001_RS25150	0.0876696	0.762574	0.929916	WP_003249787.1	DUF2788 domain-containing protein
gene-M8001_RS25145	0.0424405	0.923959	0.98332	WP_003249795.1	Lrp/AsnC family transcriptional regulator
gene-M8001_RS25070	0.778221	0.0335881	0.251814	WP_003249850.1	GNAT family N-acetyltransferase
gene-M8001_RS25060	-0.0188338	0.940236	0.988375	WP_003249853.1	HAD family hydrolase
gene-M8001_RS24935	-0.0427541	0.871394	0.968133	WP_003249898.1	DUF3077 domain-containing protein
gene-M8001_RS24910	1.60101	5.64143e-05	0.00249466	WP_003249907.1	FMN-dependent L-lactate dehydrogenase LldD
gene-M8001_RS24895	-0.117011	0.683228	0.904673	WP_003249914.1	SsrA-binding protein SmpB
gene-M8001_RS24890	0.480601	0.116468	0.454391	WP_003249916.1	type II toxin-antitoxin system RatA family toxin
gene-M8001_RS24880	0.184721	0.578351	0.862567	WP_003249922.1	ferric iron uptake transcriptional regulator
gene-M8001_RS24855	0.236866	0.496026	0.821708	WP_003249933.1	4-hydroxy-tetrahydrodipicolinate reductase
gene-M8001_RS24840	0.220836	0.522006	0.834211	WP_003249939.1	transcription elongation factor GreA
gene-M8001_RS24830	-0.112898	0.727499	0.919257	WP_003249945.1	ribosome assembly RNA-binding protein YhbY
gene-M8001_RS24825	0.446513	0.125942	0.473069	WP_003249947.1	23S rRNA (uridine(2552)-2'-O)-methyltransferase RlmE
gene-M8001_RS24805	-0.673916	0.112201	0.446034	WP_003249956.1	triose-phosphate isomerase
gene-M8001_RS24785	-0.534832	0.228381	0.602365	WP_003249960.1	ribosome maturation factor RimP
gene-M8001_RS24780	-0.114832	0.812901	0.948116	WP_003249963.1	transcription termination factor NusA
gene-M8001_RS24775	0.517955	0.284532	0.660447	WP_003249965.1	translation initiation factor IF-2
gene-M8001_RS24770	0.625014	0.155994	0.526302	WP_003249967.1	30S ribosome-binding factor RbfA
gene-M8001_RS24760	0.480143	0.219013	0.591986	WP_003249971.1	30S ribosomal protein S15
gene-M8001_RS24750	0.214706	0.593868	0.869849	WP_003249976.1	BON domain-containing protein
gene-M8001_RS24710	0.832869	0.0130116	0.138278	WP_003249992.1	3-methyl-2-oxobutanoate hydroxymethyltransferase
gene-M8001_RS24685	-0.09015	0.828908	0.955854	WP_003250005.1	hypothetical protein
gene-M8001_RS24675	0.19905	0.50478	0.826448	WP_003250009.1	RNA polymerase-binding protein DksA
gene-M8001_RS24615	0.402905	0.164492	0.535432	WP_003250034.1	YqcC family protein
gene-M8001_RS24605	-0.619138	0.075927	0.375303	WP_003250040.1	acetolactate synthase small subunit
gene-M8001_RS24600	-0.156856	0.735274	0.921961	WP_003250043.1	ketol-acid reductoisomerase
gene-M8001_RS24595	-0.271591	0.406677	0.763874	WP_003250045.1	CDP-diacylglycerol--serine O-phosphatidyltransferase
gene-M8001_RS11550	0.56042	0.139908	0.495953	WP_003250077.1	phosphonoacetaldehyde hydrolase
gene-M8001_RS11580	0.621507	0.0625802	0.342694	WP_003250091.1	SDR family NAD(P)-dependent oxidoreductase
gene-M8001_RS11595	0.346554	0.296207	0.671444	WP_003250095.1	enoyl-CoA hydratase
gene-M8001_RS11610	-0.798006	0.0303495	0.238859	WP_003250099.1	TraR/DksA family transcriptional regulator
gene-M8001_RS11630	-0.771667	0.0109709	0.12472	WP_003250107.1	Na+/H+ antiporter subunit G
gene-M8001_RS11650	-0.62367	0.0429266	0.286146	WP_003250128.1	Na+/H+ antiporter subunit C
gene-M8001_RS11665	0.437298	0.174843	0.546924	WP_003250134.1	XRE family transcriptional regulator
gene-M8001_RS11850	-0.556815	0.158414	0.528884	WP_003250228.1	carbohydrate ABC transporter permease
gene-M8001_RS11855	-0.696597	0.19056	0.562728	WP_003250230.1	DUF2160 domain-containing protein
gene-M8001_RS11860	-0.392709	0.289949	0.667297	WP_003250232.1	ABC transporter substrate-binding protein
gene-M8001_RS11865	-0.126318	0.721236	0.916962	WP_003250234.1	bifunctional methylenetetrahydrofolate dehydrogenase/methenyltetrahydrofolate cyclohydrolase FolD
gene-M8001_RS12115	0.0361651	0.919565	0.981245	WP_003250242.1	ATP-dependent Clp protease ATP-binding subunit ClpX
gene-M8001_RS12125	0.146278	0.67263	0.899483	WP_003250246.1	DNA-binding protein HU-beta
gene-M8001_RS12140	0.611906	0.0601191	0.33766	WP_003250254.1	lipoprotein
gene-M8001_RS12215	-0.0196601	0.958701	0.993485	WP_003250288.1	Lpp/OprI family alanine-zipper lipoprotein
gene-M8001_RS12220	0.136014	0.639278	0.886699	WP_003250290.1	N-acetyltransferase
gene-M8001_RS12235	0.785285	0.0613087	0.341054	WP_003250295.1	universal stress protein
gene-M8001_RS12245	-0.0937854	0.750184	0.927213	WP_003250299.1	phosphoadenylyl-sulfate reductase
gene-M8001_RS12270	0.51983	0.189844	0.562118	WP_003250308.1	GntR family transcriptional regulator
gene-M8001_RS12280	0.230858	0.497089	0.822477	WP_003250313.1	2-methylcitrate synthase
gene-M8001_RS12310	0.0251641	0.945843	0.98985	WP_003250327.1	6-carboxytetrahydropterin synthase QueD
gene-M8001_RS12330	-0.663838	0.0831538	0.391957	WP_003250344.1	PepSY domain-containing protein
gene-M8001_RS12380	-0.173046	0.562573	0.858311	WP_003250360.1	response regulator
gene-M8001_RS12455	-0.0674359	0.863882	0.966497	WP_003250391.1	DUF934 domain-containing protein
gene-M8001_RS12490	0.281609	0.418568	0.772551	WP_003250416.1	Fe-S biogenesis protein NfuA
gene-M8001_RS12495	0.323738	0.297005	0.671739	WP_003250418.1	SCO family protein
gene-M8001_RS12505	1.78717	1.43961e-05	0.000834654	WP_003250422.1	hypothetical protein
gene-M8001_RS12515	-0.27679	0.417116	0.772551	WP_003250425.1	AraC family transcriptional regulator
gene-M8001_RS12615	-0.159985	0.679454	0.903744	WP_003250463.1	response regulator
gene-M8001_RS12635	-0.32277	0.464527	0.802616	WP_003250469.1	type II 3-dehydroquinate dehydratase
gene-M8001_RS12675	-0.0442561	0.90894	0.978419	WP_003250486.1	GNAT family N-acetyltransferase
gene-M8001_RS12750	-0.241932	0.435357	0.781813	WP_003250518.1	AraC family transcriptional regulator
gene-M8001_RS12765	0.291877	0.37288	0.737889	WP_003250525.1	DUF2384 domain-containing protein
gene-M8001_RS12770	0.231886	0.486416	0.815108	WP_003250527.1	RES family NAD+ phosphorylase
gene-M8001_RS12805	0.539405	0.331911	0.706903	WP_003250537.1	alkyl hydroperoxide reductase subunit C
gene-M8001_RS12815	1.30529	0.00254545	0.0470643	WP_003250541.1	hypothetical protein
gene-M8001_RS12830	0.110727	0.736898	0.921994	WP_003250547.1	transcriptional activator NhaR
gene-M8001_RS12840	0.488694	0.174954	0.546924	WP_003250551.1	TerC family protein
gene-M8001_RS12845	1.69808	0.00141669	0.0304987	WP_003250553.1	hypothetical protein
gene-M8001_RS12855	0.666977	0.103871	0.432907	WP_003250557.1	FAD-binding oxidoreductase
gene-M8001_RS12920	-0.942175	0.00119909	0.0274768	WP_003250646.1	D-ribose pyranase
gene-M8001_RS12930	0.308073	0.326168	0.700415	WP_003250649.1	hypothetical protein
gene-M8001_RS12940	0.031982	0.939837	0.988375	WP_003250656.1	cold-shock protein
gene-M8001_RS12960	0.139339	0.720497	0.916962	WP_003250667.1	50S ribosomal protein L35
gene-M8001_RS12965	0.302204	0.438835	0.784602	WP_003250671.1	50S ribosomal protein L20
gene-M8001_RS12970	-0.152054	0.696272	0.907606	WP_003250674.1	phenylalanine--tRNA ligase subunit alpha
gene-M8001_RS12980	0.192135	0.566762	0.859035	WP_003250679.1	integration host factor subunit alpha
gene-M8001_RS12985	0.0805907	0.806771	0.945821	WP_003250681.1	MerR family transcriptional regulator
gene-M8001_RS13345	0.236516	0.555397	0.853899	WP_003250754.1	DUF3077 domain-containing protein
gene-M8001_RS13435	0.341803	0.283244	0.659457	WP_003250790.1	bifunctional sugar phosphate isomerase/epimerase/4-hydroxyphenylpyruvate dioxygenase family protein
gene-M8001_RS13505	0.114002	0.723324	0.916962	WP_003250810.1	VOC family protein
gene-M8001_RS13520	1.2037	0.00796995	0.10218	WP_003250813.1	hypothetical protein
gene-M8001_RS13525	1.43151	0.000618106	0.0164433	WP_003250815.1	VOC family protein
gene-M8001_RS13605	-0.373273	0.294513	0.670957	WP_003250846.1	aspartate aminotransferase family protein
gene-M8001_RS13690	-0.214942	0.810394	0.947275	WP_003250862.1	NIPSNAP family protein
gene-M8001_RS20065	-0.415369	0.225851	0.599451	WP_003250915.1	hypothetical protein
gene-M8001_RS20070	-0.0900447	0.763937	0.930491	WP_003250918.1	DUF1883 domain-containing protein
gene-M8001_RS20150	-0.269238	0.347271	0.71708	WP_003250934.1	DUF6434 domain-containing protein
gene-M8001_RS20600	0.656078	0.0363763	0.266216	WP_003251077.1	SCP2 sterol-binding domain-containing protein
gene-M8001_RS20610	1.67981	0.000274771	0.00853425	WP_003251082.1	SDR family oxidoreductase
gene-M8001_RS20615	-0.105195	0.744481	0.924658	WP_003251085.1	class I SAM-dependent methyltransferase
gene-M8001_RS20675	-0.0212483	0.982029	1	WP_003251108.1	MFS transporter
gene-M8001_RS20680	0.158205	0.776282	0.935267	WP_003251109.1	N-carbamoylsarcosine amidohydrolase
gene-M8001_RS20685	0.629638	0.154873	0.523579	WP_003251112.1	maleate isomerase
gene-M8001_RS20705	0.326179	0.246015	0.623911	WP_003251120.1	MarR family winged helix-turn-helix transcriptional regulator
gene-M8001_RS20735	0.340157	0.44909	0.793549	WP_003251131.1	3-oxoacid CoA-transferase subunit B
gene-M8001_RS20940	0.520334	0.189666	0.561999	WP_003251184.1	Bax inhibitor-1/YccA family protein
gene-M8001_RS20950	-0.21934	0.431883	0.7807	WP_003251188.1	sulfurtransferase complex subunit TusD
gene-M8001_RS20960	-0.344407	0.250948	0.627893	WP_003251193.1	sulfurtransferase complex subunit TusB
gene-M8001_RS20990	-0.393191	0.1699	0.542033	WP_003251205.1	fluoride efflux transporter CrcB
gene-M8001_RS21000	-0.240393	0.401167	0.759656	WP_003251209.1	outer membrane lipoprotein chaperone LolA
gene-M8001_RS21010	0.103328	0.711648	0.913051	WP_003251213.1	leucyl/phenylalanyl-tRNA--protein transferase
gene-M8001_RS21015	0.442985	0.171378	0.543948	WP_003251215.1	arginyltransferase
gene-M8001_RS21030	0.383613	0.261124	0.639738	WP_003251220.1	ATP-dependent Clp protease adapter ClpS
gene-M8001_RS21075	-0.29501	0.485482	0.814947	WP_003251237.1	GNAT family N-acetyltransferase
gene-M8001_RS21180	0.0685869	0.820037	0.952572	WP_003251273.1	VOC family protein
gene-M8001_RS21260	0.167877	0.568557	0.859047	WP_003251297.1	endonuclease/exonuclease/phosphatase family protein
gene-M8001_RS21285	0.454848	0.499578	0.823393	WP_003251307.1	hypothetical protein
gene-M8001_RS21295	0.978573	0.0135193	0.141939	WP_003251317.1	isovaleryl-CoA dehydrogenase
gene-M8001_RS21305	-0.359837	0.224359	0.597605	WP_003251320.1	gamma-carboxygeranoyl-CoA hydratase
gene-M8001_RS21375	-0.916424	0.0165223	0.162321	WP_003251351.1	type VI secretion system baseplate subunit TssK
gene-M8001_RS21490	-0.382447	0.273795	0.652611	WP_003251380.1	UvrY/SirA/GacA family response regulator transcription factor
gene-M8001_RS21520	-0.0485356	0.862508	0.966382	WP_003251394.1	PaaI family thioesterase
gene-M8001_RS21530	-0.13661	0.693567	0.906215	WP_003251398.1	transcriptional regulator GcvA
gene-M8001_RS21585	-0.605031	0.050681	0.311488	WP_003251427.1	NADH-quinone oxidoreductase subunit A
gene-M8001_RS21590	-0.50182	0.171493	0.543982	WP_003251429.1	NADH-quinone oxidoreductase subunit B
gene-M8001_RS21600	-0.432996	0.214202	0.587402	WP_003251433.1	NADH-quinone oxidoreductase subunit NuoE
gene-M8001_RS21615	-0.220833	0.573735	0.860345	WP_003251440.1	NADH-quinone oxidoreductase subunit NuoH
gene-M8001_RS21620	-0.216143	0.572847	0.860345	WP_003251442.1	NADH-quinone oxidoreductase subunit NuoI
gene-M8001_RS21625	-0.208031	0.588271	0.866648	WP_003251444.1	NADH-quinone oxidoreductase subunit J
gene-M8001_RS21630	-0.243496	0.517318	0.831853	WP_003251446.1	NADH-quinone oxidoreductase subunit NuoK
gene-M8001_RS21680	0.426115	0.14904	0.512989	WP_003251456.1	class I chromate reductase ChrR
gene-M8001_RS21700	-0.328207	0.272857	0.651637	WP_003251460.1	ribonuclease HI
gene-M8001_RS21705	0.0175481	0.959387	0.993485	WP_003251461.1	methyltransferase domain-containing protein
gene-M8001_RS21780	0.369862	0.27063	0.649165	WP_003251480.1	potassium-transporting ATPase subunit KdpC
gene-M8001_RS21810	0.177647	0.544148	0.846561	WP_003251491.1	alpha/beta hydrolase
gene-M8001_RS21830	0.0857158	0.775049	0.935165	WP_003251499.1	DUF4389 domain-containing protein
gene-M8001_RS21855	-0.680483	0.0846654	0.393342	WP_003251509.1	3-hydroxyacyl-[acyl-carrier-protein] dehydratase FabA
gene-M8001_RS21885	0.0807993	0.857538	0.964777	WP_003251519.1	PaaI family thioesterase
gene-M8001_RS24510	0.493689	0.295224	0.671444	WP_003251579.1	cupin domain-containing protein
gene-M8001_RS24405	-0.138352	0.639295	0.886699	WP_003251626.1	DNA repair protein RadA
gene-M8001_RS24385	0.802423	0.00800147	0.102333	WP_003251633.1	YbdD/YjiX family protein
gene-M8001_RS24315	-0.190314	0.506224	0.826495	WP_003251656.1	flavodoxin
gene-M8001_RS24255	0.976872	0.00150789	0.0319845	WP_003251679.1	YebG family protein
gene-M8001_RS24250	-0.909046	0.0117428	0.129544	WP_003251685.1	phosphate-starvation-inducible PsiE family protein
gene-M8001_RS06590	-0.0247577	0.925873	0.9846	WP_003251712.1	LysR family transcriptional regulator
gene-M8001_RS06600	0.117994	0.711252	0.912768	WP_003251716.1	FUSC family protein
gene-M8001_RS06665	0.598145	0.0694708	0.362498	WP_003251742.1	mannose-1-phosphate guanylyltransferase/mannose-6-phosphate isomerase
gene-M8001_RS06670	0.273011	0.572739	0.860345	WP_003251744.1	alginate O-acetyltransferase AlgF
gene-M8001_RS06695	0.60775	0.189115	0.56132	WP_003251754.1	mannuronan 5-epimerase AlgG
gene-M8001_RS06715	0.219034	0.864624	0.966497	WP_003251762.1	glycosyltransferase family 2 protein
gene-M8001_RS06735	0.962373	0.0245316	0.205553	WP_003251772.1	PhoH family protein
gene-M8001_RS06740	0.372786	0.261311	0.639738	WP_003251775.1	cyclic pyranopterin monophosphate synthase MoaC
gene-M8001_RS06745	0.205138	0.558772	0.855499	WP_003251777.1	molybdopterin converting factor subunit 1
gene-M8001_RS06780	-0.251155	0.518189	0.832591	WP_003251792.1	amino acid ABC transporter ATP-binding protein
gene-M8001_RS06795	-0.170686	0.682457	0.904673	WP_003251799.1	sulfate adenylyltransferase subunit CysD
gene-M8001_RS06800	0.0351059	0.935528	0.987393	WP_003251801.1	sulfate adenylyltransferase subunit CysN
gene-M8001_RS06815	0.246804	0.596052	0.870735	WP_003251803.1	Lrp/AsnC family transcriptional regulator
gene-M8001_RS06855	-0.434299	0.322521	0.698314	WP_003251819.1	50S ribosomal protein L13
gene-M8001_RS06860	-0.331767	0.455115	0.796641	WP_003251821.1	30S ribosomal protein S9
gene-M8001_RS06865	-0.154272	0.657628	0.894363	WP_003251823.1	ubiquinol-cytochrome c reductase iron-sulfur subunit
gene-M8001_RS06885	-0.246388	0.454005	0.796063	WP_003251830.1	ClpXP protease specificity-enhancing factor
gene-M8001_RS06950	-0.497667	0.186781	0.558835	WP_003251852.1	phospho-N-acetylmuramoyl-pentapeptide-transferase
gene-M8001_RS06985	-0.378662	0.339268	0.712157	WP_003251867.1	cell division protein FtsA
gene-M8001_RS06990	-0.0999333	0.798674	0.943368	WP_003251871.1	cell division protein FtsZ
gene-M8001_RS06995	-0.330191	0.382148	0.74731	WP_003251873.1	UDP-3-O-acyl-N-acetylglucosamine deacetylase
gene-M8001_RS07000	0.192522	0.527014	0.834839	WP_003251875.1	DUF721 domain-containing protein
gene-M8001_RS07040	-0.157553	0.608125	0.875046	WP_003251890.1	YajQ family cyclic di-GMP-binding protein
gene-M8001_RS07045	-0.334916	0.291802	0.668696	WP_003251892.1	mechanosensitive ion channel family protein
gene-M8001_RS07080	0.958383	0.00265793	0.048177	WP_003251905.1	co-chaperone GroES
gene-M8001_RS07090	0.125463	0.767915	0.932507	WP_003251912.1	pyruvate kinase
gene-M8001_RS07095	0.614303	0.0537443	0.317862	WP_003251914.1	hypothetical protein
gene-M8001_RS07115	-0.569763	0.0626542	0.342694	WP_003251921.1	formyltetrahydrofolate deformylase
gene-M8001_RS07150	-0.871571	0.0602258	0.33766	WP_003251935.1	inorganic phosphate transporter
gene-M8001_RS07155	0.0525486	0.908315	0.978419	WP_003251937.1	hypothetical protein
gene-M8001_RS07235	0.226878	0.431482	0.7807	WP_003251963.1	oxaloacetate decarboxylase
gene-M8001_RS07415	-0.394206	0.208749	0.582488	WP_003252043.1	succinate dehydrogenase assembly factor 2
gene-M8001_RS07430	-0.344519	0.3667	0.732061	WP_003252049.1	RNA polymerase sigma factor RpoE
gene-M8001_RS07435	-0.403948	0.286447	0.662745	WP_003252050.1	RseA family anti-sigma factor
gene-M8001_RS07455	-0.391982	0.316153	0.691822	WP_003252057.1	signal peptidase I
gene-M8001_RS07460	-0.129444	0.738603	0.922458	WP_003252059.1	ribonuclease III
gene-M8001_RS07485	0.605441	0.0904733	0.407113	WP_003252070.1	heavy metal response regulator transcription factor
gene-M8001_RS07490	1.49876	0.00140146	0.0303437	WP_003252072.1	hypothetical protein
gene-M8001_RS07600	-0.608157	0.116052	0.453941	WP_003252139.1	signal recognition particle protein
gene-M8001_RS07605	-0.378494	0.405996	0.763635	WP_003252142.1	30S ribosomal protein S16
gene-M8001_RS07610	-0.299869	0.522319	0.834211	WP_003252144.1	ribosome maturation factor RimM
gene-M8001_RS07615	-0.117132	0.803204	0.944525	WP_003252146.1	tRNA (guanosine(37)-N1)-methyltransferase TrmD
gene-M8001_RS07620	0.0448603	0.930432	0.985185	WP_003252148.1	50S ribosomal protein L19
gene-M8001_RS07635	-0.488003	0.086466	0.395917	WP_003252154.1	site-specific tyrosine recombinase XerD
gene-M8001_RS07645	-0.150005	0.669523	0.899246	WP_003252157.1	homoserine dehydrogenase
gene-M8001_RS07675	-0.65327	0.0460758	0.295724	WP_003252169.1	YaeQ family protein
gene-M8001_RS07785	0.162996	0.577684	0.862189	WP_003252215.1	flavohemoglobin expression-modulating QEGLA motif protein
gene-M8001_RS07805	-0.218795	0.600322	0.872072	WP_003252223.1	DUF4398 domain-containing protein
gene-M8001_RS07885	0.377321	0.205426	0.578941	WP_003252249.1	YbaY family lipoprotein
gene-M8001_RS07895	-0.384926	0.189615	0.561999	WP_003252255.1	cold-shock protein
gene-M8001_RS07905	-0.512438	0.141044	0.498622	WP_003252259.1	methyltransferase domain-containing protein
gene-M8001_RS07925	0.333143	0.242508	0.618479	WP_003252266.1	SufE family protein
gene-M8001_RS07940	0.144852	0.646676	0.888492	WP_003252272.1	ArsC family reductase
gene-M8001_RS08275	-0.13623	0.687447	0.904673	WP_003252286.1	type I methionyl aminopeptidase
gene-M8001_RS08280	-0.232364	0.594792	0.869849	WP_003252287.1	30S ribosomal protein S2
gene-M8001_RS08290	-0.380023	0.374596	0.739583	WP_003252294.1	UMP kinase
gene-M8001_RS08295	-0.210436	0.609215	0.875725	WP_003252296.1	ribosome recycling factor
gene-M8001_RS08325	-0.27354	0.451461	0.794687	WP_003252311.1	OmpH family outer membrane protein
gene-M8001_RS08330	-0.426492	0.248851	0.62707	WP_003252312.1	UDP-3-O-(3-hydroxymyristoyl)glucosamine N-acyltransferase
gene-M8001_RS08335	-0.446748	0.21636	0.588924	WP_003252314.1	3-hydroxyacyl-ACP dehydratase FabZ
gene-M8001_RS08350	-0.12792	0.781594	0.936828	WP_003252319.1	ribonuclease HII
gene-M8001_RS08360	-0.611803	0.110032	0.4437	WP_003252323.1	acetyl-CoA carboxylase carboxyltransferase subunit alpha
gene-M8001_RS08370	-0.356397	0.328707	0.702947	WP_003252329.1	CTP synthase
gene-M8001_RS08380	-0.460191	0.249791	0.627242	WP_003252333.1	phosphopyruvate hydratase
gene-M8001_RS08405	0.302477	0.324277	0.69974	WP_003252340.1	S-formylglutathione hydrolase
gene-M8001_RS08410	-0.596864	0.0491366	0.308157	WP_003252342.1	2-C-methyl-D-erythritol 2%2C4-cyclodiphosphate synthase
gene-M8001_RS08425	-0.352874	0.241368	0.617556	WP_003252348.1	protein-L-isoaspartate(D-aspartate) O-methyltransferase
gene-M8001_RS08435	-0.143124	0.715224	0.914043	WP_003252351.1	RNA polymerase sigma factor RpoS
gene-M8001_RS08445	-0.150948	0.701346	0.908569	WP_003252355.1	ferredoxin family protein
gene-M8001_RS08465	0.559338	0.163734	0.53431	WP_003252365.1	recombinase RecA
gene-M8001_RS08485	0.0209346	0.964874	0.995405	WP_003252372.1	quorum-sensing-regulated virulence factor family protein
gene-M8001_RS08490	-0.553893	0.065047	0.352091	WP_003252373.1	DTW domain-containing protein
gene-M8001_RS08505	-0.403595	0.154926	0.523579	WP_003252379.1	LysR family transcriptional regulator FinR
gene-M8001_RS08510	-0.0119916	0.967745	0.997014	WP_003252381.1	ferredoxin-NADP reductase
gene-M8001_RS08520	2.45311	0.000209726	0.00695967	WP_003252385.1	YIP1 family protein
gene-M8001_RS08540	-0.300494	0.298527	0.672878	WP_003252400.1	NAD(P)H:quinone oxidoreductase
gene-M8001_RS08605	0.390655	0.177194	0.548698	WP_003252422.1	nucleoside triphosphate pyrophosphohydrolase
gene-M8001_RS08610	0.174635	0.552173	0.852584	WP_003252424.1	DUF2058 domain-containing protein
gene-M8001_RS08630	1.36292	0.0026853	0.048484	WP_003252431.1	hypothetical protein
gene-M8001_RS08645	-0.826602	0.0498602	0.310466	WP_003252437.1	phosphoribosylformylglycinamidine cyclo-ligase
gene-M8001_RS08660	-0.278848	0.395478	0.754802	WP_003252443.1	DnaA regulatory inactivator Hda
gene-M8001_RS08675	0.409566	0.2151	0.58764	WP_003252448.1	cob(I)yrinic acid a%2Cc-diamide adenosyltransferase
gene-M8001_RS08705	0.761358	0.0547181	0.321531	WP_003252463.1	bifunctional adenosylcobinamide kinase/adenosylcobinamide-phosphate guanylyltransferase
gene-M8001_RS08765	0.596574	0.125497	0.472128	WP_003252489.1	hypothetical protein
gene-M8001_RS08820	-0.265235	0.414064	0.769439	WP_003252510.1	recombination-associated protein RdgC
gene-M8001_RS08910	0.24042	0.400464	0.759146	WP_003252539.1	hypothetical protein
gene-M8001_RS08940	-0.557506	0.0870797	0.396494	WP_003252553.1	ABC transporter permease
gene-M8001_RS08950	-0.0918668	0.784644	0.938654	WP_003252558.1	alkaline phosphatase family protein
gene-M8001_RS08960	0.48846	0.160077	0.530512	WP_003252562.1	UTRA domain-containing protein
gene-M8001_RS08970	1.03218	0.00680207	0.0920337	WP_003252566.1	hypothetical protein
gene-M8001_RS08985	-0.267799	0.383249	0.747456	WP_003252572.1	cell division topological specificity factor MinE
gene-M8001_RS08990	-0.574122	0.099467	0.423205	WP_003252574.1	septum site-determining protein MinD
gene-M8001_RS09030	0.68429	0.115525	0.452922	WP_003252589.1	glycine betaine ABC transporter substrate-binding protein
gene-M8001_RS09045	-0.301347	0.393109	0.752768	WP_003252624.1	DUF3309 family protein
gene-M8001_RS09070	-0.859542	0.0217916	0.192159	WP_003252632.1	N-acetylglutaminylglutamine synthetase
gene-M8001_RS09140	-0.165686	0.585219	0.865984	WP_003252656.1	YciK family oxidoreductase
gene-M8001_RS09150	-0.629935	0.0930574	0.412552	WP_003252662.1	bifunctional 3-demethylubiquinone 3-O-methyltransferase/2-octaprenyl-6-hydroxy phenol methylase
gene-M8001_RS09185	0.201422	0.618634	0.878021	WP_003252673.1	30S ribosomal protein S1
gene-M8001_RS09425	2.63685	2.72665e-08	2.96409e-06	WP_003252780.1	SDR family oxidoreductase
gene-M8001_RS09455	-0.348184	0.277383	0.657015	WP_003252789.1	GTP cyclohydrolase I FolE
gene-M8001_RS09470	-0.160507	0.649285	0.889698	WP_003252796.1	cysteine hydrolase
gene-M8001_RS09485	-0.400421	0.318876	0.695607	WP_003252801.1	alpha/beta fold hydrolase
gene-M8001_RS09490	-0.203562	0.553159	0.852584	WP_003252803.1	chorismate synthase
gene-M8001_RS09505	0.169081	0.78979	0.940467	WP_003252809.1	DUF3509 domain-containing protein
gene-M8001_RS09525	0.229822	0.483548	0.813567	WP_003252818.1	PLD nuclease N-terminal domain-containing protein
gene-M8001_RS09625	-0.14894	0.705824	0.909173	WP_003252871.1	elongation factor P
gene-M8001_RS09650	0.568839	0.0786778	0.383325	WP_003252879.1	LysR substrate-binding domain-containing protein
gene-M8001_RS00800	0.218134	0.760227	0.929841	WP_003252914.1	NAD(P) transhydrogenase subunit alpha
gene-M8001_RS00795	0.0529689	0.87459	0.968811	WP_003252919.1	NAD(P)(+) transhydrogenase (Re/Si-specific) subunit beta
gene-M8001_RS00790	-1.46315	3.58988e-05	0.00176556	WP_003252922.1	acetyl-CoA hydrolase/transferase family protein
gene-M8001_RS00785	0.782072	0.258391	0.636885	WP_003252924.1	DUF1127 domain-containing protein
gene-M8001_RS00770	0.128416	0.780826	0.936536	WP_003252932.1	DUF2388 domain-containing protein
gene-M8001_RS00695	0.555031	0.363871	0.730202	WP_003252966.1	DUF1328 domain-containing protein
gene-M8001_RS00655	-0.182173	0.537619	0.842579	WP_003252985.1	endonuclease/exonuclease/phosphatase family protein
gene-M8001_RS00645	0.192097	0.512908	0.830135	WP_003252989.1	cytochrome c4
gene-M8001_RS00640	0.040554	0.886739	0.972512	WP_003252992.1	c-type cytochrome
gene-M8001_RS00620	-0.217001	0.468622	0.805047	WP_003252998.1	homoserine kinase
gene-M8001_RS00610	-0.457054	0.181244	0.552651	WP_003253002.1	zinc uptake transcriptional repressor Zur
gene-M8001_RS00585	-0.359436	0.351431	0.721784	WP_003253013.1	methionine ABC transporter ATP-binding protein
gene-M8001_RS00570	-0.372948	0.20473	0.578941	WP_003253019.1	SCO family protein
gene-M8001_RS00545	1.16358	0.00965911	0.114809	WP_003253030.1	twin transmembrane helix small protein
gene-M8001_RS00535	-0.355458	0.548443	0.849191	WP_003253035.1	cytochrome c oxidase assembly protein
gene-M8001_RS00510	-0.505213	0.166625	0.53746	WP_003253046.1	carbonic anhydrase
gene-M8001_RS00460	1.06205	0.00849382	0.106285	WP_003253070.1	OsmC family protein
gene-M8001_RS00445	0.39521	0.183742	0.554254	WP_003253076.1	dodecin family protein
gene-M8001_RS00370	-0.487325	0.235954	0.612542	WP_003253106.1	hypothetical protein
gene-M8001_RS00355	-0.0883403	0.770239	0.933374	WP_003253111.1	peptide deformylase
gene-M8001_RS00320	-0.206261	0.564801	0.858917	WP_003253126.1	glycine--tRNA ligase subunit alpha
gene-M8001_RS00310	-0.189107	0.563382	0.858816	WP_003253129.1	D-glycero-beta-D-manno-heptose 1%2C7-bisphosphate 7-phosphatase
gene-M8001_RS00065	0.107335	0.796604	0.942682	WP_003253152.1	DNA topoisomerase (ATP-hydrolyzing) subunit B
gene-M8001_RS00060	-0.0300872	0.930124	0.985185	WP_003253154.1	DNA replication/repair protein RecF
gene-M8001_RS00055	-0.319001	0.378349	0.744147	WP_003253156.1	DNA polymerase III subunit beta
gene-M8001_RS00045	-0.883057	0.0386082	0.272543	WP_003253163.1	50S ribosomal protein L34
gene-M8001_RS00040	-0.793379	0.0786673	0.383325	WP_003253166.1	ribonuclease P protein component
gene-M8001_RS00015	-0.127277	0.688623	0.904694	WP_003253179.1	16S rRNA (guanine(527)-N(7))-methyltransferase RsmG
gene-M8001_RS00010	-0.284508	0.418516	0.772551	WP_003253182.1	ParA family protein
gene-M8001_RS00005	-0.254614	0.464903	0.802735	WP_003253185.1	ParB/RepB/Spo0J family partition protein
gene-M8001_RS28465	-0.421787	0.322322	0.698314	WP_003253191.1	F0F1 ATP synthase subunit delta
gene-M8001_RS28455	-0.0549241	0.904121	0.977698	WP_003253195.1	F0F1 ATP synthase subunit gamma
gene-M8001_RS28450	0.135719	0.778386	0.935952	WP_003253197.1	F0F1 ATP synthase subunit beta
gene-M8001_RS28435	-0.136736	0.704249	0.909173	WP_003253204.1	DeoR family transcriptional regulator
gene-M8001_RS28210	0.447081	0.413546	0.769062	WP_003253228.1	aromatic ring-hydroxylating dioxygenase subunit alpha
gene-M8001_RS28190	0.120023	0.763386	0.930472	WP_003253234.1	FAD-binding oxidoreductase
gene-M8001_RS28185	-0.345005	0.574786	0.860922	WP_003253236.1	ethanolamine utilization protein EutQ
gene-M8001_RS28125	0.300611	0.403911	0.761447	WP_003253259.1	DUF3301 domain-containing protein
gene-M8001_RS28115	-0.684285	0.0244925	0.205553	WP_003253263.1	acyl-CoA thioesterase
gene-M8001_RS28090	0.0981714	0.737934	0.922211	WP_003253271.1	glucose-6-phosphate dehydrogenase
gene-M8001_RS28085	-0.220206	0.514304	0.830209	WP_003253273.1	transcriptional regulator HexR
gene-M8001_RS28070	-0.649766	0.176226	0.548698	WP_003253279.1	acetyl-CoA carboxylase biotin carboxylase subunit
gene-M8001_RS28065	-0.26043	0.611196	0.875854	WP_003253282.1	sodium-extruding oxaloacetate decarboxylase subunit alpha
gene-M8001_RS28055	0.723935	0.0395554	0.274834	WP_003253286.1	GNAT family N-acetyltransferase
gene-M8001_RS28015	-0.771404	0.0744734	0.372939	WP_003253304.1	5-(carboxyamino)imidazole ribonucleotide mutase
gene-M8001_RS27990	-0.0714094	0.834332	0.957571	WP_003253317.1	acyl-CoA thioesterase
gene-M8001_RS27965	0.423414	0.150311	0.514986	WP_003253327.1	phosphate ABC transporter ATP-binding protein PstB
gene-M8001_RS27960	0.616456	0.0682944	0.35996	WP_003253329.1	phosphate signaling complex protein PhoU
gene-M8001_RS27935	0.386757	0.204109	0.578767	WP_003253341.1	phosphate regulon transcriptional regulator PhoB
gene-M8001_RS27915	0.238555	0.461291	0.800259	WP_003253349.1	rubredoxin
gene-M8001_RS27905	0.108206	0.745227	0.924658	WP_003253355.1	HU family DNA-binding protein
gene-M8001_RS27885	-0.178297	0.603149	0.873298	WP_003253362.1	hydrogen peroxide-inducible genes activator
gene-M8001_RS27875	-0.443036	0.164876	0.536026	WP_003253367.1	TonB system transport protein ExbD
gene-M8001_RS27845	-0.302325	0.362079	0.728618	WP_003253383.1	DNA-directed RNA polymerase subunit omega
gene-M8001_RS27840	0.296988	0.333725	0.708276	WP_003253385.1	LysR family transcriptional regulator
gene-M8001_RS27810	0.0922128	0.804783	0.944525	WP_003253397.1	ribonuclease PH
gene-M8001_RS27805	0.240606	0.457036	0.797408	WP_003253399.1	DUF4870 domain-containing protein
gene-M8001_RS27800	-0.144374	0.684493	0.904673	WP_003253401.1	exodeoxyribonuclease III
gene-M8001_RS27795	-0.0401069	0.89026	0.974487	WP_003253405.1	orotate phosphoribosyltransferase
gene-M8001_RS00240	0.300192	0.532555	0.838247	WP_003253420.1	heavy metal response regulator transcription factor
gene-M8001_RS00235	0.369498	0.467242	0.804336	WP_003253422.1	OprD family porin
gene-M8001_RS00155	0.733338	0.0591142	0.337112	WP_003253457.1	heavy metal response regulator transcription factor
gene-M8001_RS00125	0.0398478	0.90485	0.977698	WP_003253468.1	hypothetical protein
gene-M8001_RS27755	-0.296339	0.510576	0.828931	WP_003253504.1	50S ribosomal protein L28
gene-M8001_RS27750	-0.327047	0.458408	0.798656	WP_003253507.1	50S ribosomal protein L33
gene-M8001_RS27730	0.349928	0.343431	0.715778	WP_003253511.1	MFS transporter
gene-M8001_RS27715	0.462409	0.268365	0.647901	WP_003253515.1	DUF1127 domain-containing protein
gene-M8001_RS27705	0.421191	0.154026	0.52304	WP_003253518.1	YkgJ family cysteine cluster protein
gene-M8001_RS27700	0.176963	0.661191	0.896062	WP_003253520.1	Lrp/AsnC ligand binding domain-containing protein
gene-M8001_RS27685	0.204862	0.502106	0.82459	WP_003253526.1	cupin domain-containing protein
gene-M8001_RS27665	-0.332387	0.30217	0.677577	WP_003253535.1	xanthine phosphoribosyltransferase
gene-M8001_RS27660	-0.945882	0.011105	0.125583	WP_003253537.1	DNA helicase Rep
gene-M8001_RS27615	0.0465959	1	1	WP_003253552.1	hydrolase
gene-M8001_RS27555	-0.229072	0.926671	0.9846	WP_003253573.1	hydrolase
gene-M8001_RS27500	-0.261798	0.417732	0.772551	WP_003253640.1	accessory factor UbiK family protein
gene-M8001_RS27485	0.22674	0.523413	0.834211	WP_003253643.1	hypothetical protein
gene-M8001_RS27445	0.23424	0.42294	0.774336	WP_003253651.1	DUF1289 domain-containing protein
gene-M8001_RS27440	-0.3932	0.174224	0.546333	WP_003253652.1	nucleoside diphosphate kinase regulator
gene-M8001_RS27400	0.156439	0.64212	0.887996	WP_003253660.1	thioredoxin TrxA
gene-M8001_RS27395	-0.176737	0.630288	0.883211	WP_003253661.1	transcription termination factor Rho
gene-M8001_RS27390	-0.192543	0.611382	0.875854	WP_003253663.1	4-hydroxy-3-polyprenylbenzoate decarboxylase
gene-M8001_RS27370	1.07125	0.0102717	0.119106	WP_003253671.1	flagellar basal body-associated protein FliL
gene-M8001_RS27340	-0.474097	0.169218	0.54038	WP_003253683.1	hypothetical protein
gene-M8001_RS27265	0.246136	0.573321	0.860345	WP_003253711.1	DUF2388 domain-containing protein
gene-M8001_RS27235	0.0431854	0.879235	0.969302	WP_003253723.1	amino-acid N-acetyltransferase
gene-M8001_RS27195	-0.625765	0.0525649	0.314185	WP_003253736.1	ABC transporter permease subunit
gene-M8001_RS17855	0.177768	0.658187	0.894363	WP_003253801.1	hypothetical protein
gene-M8001_RS17905	0.774908	0.0167814	0.163001	WP_003253822.1	DUF1272 domain-containing protein
gene-M8001_RS17975	1.31482	0.000137569	0.0049808	WP_003253847.1	efflux RND transporter periplasmic adaptor subunit
gene-M8001_RS17980	0.997488	0.00189509	0.0378873	WP_003253849.1	efflux RND transporter permease subunit
gene-M8001_RS15040	0.793252	0.0230977	0.200537	WP_003253895.1	hypothetical protein
gene-M8001_RS15030	0.928802	0.0224369	0.196011	WP_003253897.1	hypothetical protein
gene-M8001_RS15020	-0.258654	0.397399	0.757075	WP_003253899.1	EamA family transporter
gene-M8001_RS14985	0.158122	0.592981	0.86915	WP_003253907.1	LysR substrate-binding domain-containing protein
gene-M8001_RS14900	-0.187372	0.620132	0.87883	WP_003253925.1	HupE/UreJ family protein
gene-M8001_RS14895	-0.594351	0.149601	0.514239	WP_003253926.1	urease accessory protein UreE
gene-M8001_RS14880	-1.87305	3.7982e-07	3.47702e-05	WP_003253929.1	urease subunit gamma
gene-M8001_RS14870	0.239589	0.421879	0.774283	WP_003253931.1	tyrosine-type recombinase/integrase
gene-M8001_RS14610	0.187624	0.790706	0.940899	WP_003253953.1	NAD(P)H-dependent oxidoreductase
gene-M8001_RS14605	0.106868	0.714315	0.913255	WP_003253954.1	MerR family transcriptional regulator
gene-M8001_RS14595	-0.0225005	0.888541	0.973218	WP_003253956.1	outer membrane lipoprotein-sorting protein
gene-M8001_RS14380	0.263509	0.569138	0.859047	WP_003253997.1	cupin domain-containing protein
gene-M8001_RS14360	3.17928	6.6278e-11	1.38336e-08	WP_003254001.1	nuclear transport factor 2 family protein
gene-M8001_RS14320	3.22444	2.70359e-12	8.29842e-10	WP_003254009.1	DUF6482 family protein
gene-M8001_RS14315	3.21956	4.72048e-12	1.23157e-09	WP_003254010.1	DUF3833 domain-containing protein
gene-M8001_RS14195	0.552688	0.0701569	0.362813	WP_003254043.1	hypothetical protein
gene-M8001_RS14115	0.223097	0.614172	0.875854	WP_003254071.1	RidA family protein
gene-M8001_RS14105	-1.43949	0.00204254	0.0400675	WP_003254074.1	alpha-E domain-containing protein
gene-M8001_RS13960	-0.0339642	0.841862	0.960738	WP_003254117.1	phosphate ABC transporter ATP-binding protein PstB
gene-M8001_RS21910	0.400467	0.466454	0.804336	WP_003254203.1	succinate--CoA ligase subunit alpha
gene-M8001_RS21915	0.356792	0.512492	0.830006	WP_003254205.1	ADP-forming succinate--CoA ligase subunit beta
gene-M8001_RS21935	0.0991624	0.798993	0.943368	WP_003254212.1	succinate dehydrogenase iron-sulfur subunit
gene-M8001_RS21940	-0.0617806	0.878577	0.968811	WP_003254213.1	succinate dehydrogenase flavoprotein subunit
gene-M8001_RS21945	-0.113884	0.766028	0.931407	WP_003254214.1	succinate dehydrogenase%2C hydrophobic membrane anchor protein
gene-M8001_RS21955	-1.30144	0.00484772	0.0731082	WP_003254218.1	citrate synthase
gene-M8001_RS21975	0.0505254	0.869438	0.967936	WP_003254223.1	PLP-dependent aminotransferase family protein
gene-M8001_RS22000	-0.0115251	0.973028	0.999068	WP_003254232.1	electron transfer flavoprotein subunit beta/FixA family protein
gene-M8001_RS22010	0.49163	0.14842	0.512489	WP_003254235.1	type II toxin-antitoxin system MqsA family antitoxin
gene-M8001_RS22160	0.146027	0.779326	0.936217	WP_003254265.1	(2Fe-2S)-binding protein
gene-M8001_RS22245	-0.272696	0.428416	0.778179	WP_003254278.1	pyrimidine/purine nucleoside phosphorylase
gene-M8001_RS22255	-0.94675	0.0408047	0.279988	WP_003254280.1	cytochrome-c oxidase%2C cbb3-type subunit I
gene-M8001_RS22275	-1.9121	6.32698e-06	0.00045853	WP_003254284.1	cytochrome-c oxidase%2C cbb3-type subunit I
gene-M8001_RS22285	-1.72039	5.2057e-06	0.000393672	WP_003254287.1	CcoQ/FixQ family Cbb3-type cytochrome c oxidase assembly chaperone
gene-M8001_RS22325	0.106998	0.755715	0.92884	WP_003254301.1	Crp/Fnr family transcriptional regulator FnrA
gene-M8001_RS22335	-0.409307	0.200977	0.574474	WP_003254304.1	recombination mediator RecR
gene-M8001_RS22340	0.331405	0.266524	0.646167	WP_003254305.1	YbaB/EbfC family nucleoid-associated protein
gene-M8001_RS22440	0.510885	0.215989	0.588647	WP_003254328.1	hydroxyisourate hydrolase
gene-M8001_RS22455	-0.148824	0.623912	0.880187	WP_003254333.1	ureidoglycolate lyase
gene-M8001_RS22470	-0.166266	0.85457	0.963931	WP_003254337.1	membrane protein
gene-M8001_RS22475	-0.17768	0.684475	0.904673	WP_003254339.1	membrane protein
gene-M8001_RS22510	0.0270441	0.92786	0.984661	WP_003254348.1	glycerate kinase
gene-M8001_RS22515	0.306071	0.358681	0.725706	WP_003254349.1	pyruvate kinase
gene-M8001_RS22550	0.371175	0.407817	0.765207	WP_003254357.1	Lrp/AsnC family transcriptional regulator
gene-M8001_RS22605	-1.32462	8.20875e-05	0.00329487	WP_003254373.1	hypothetical protein
gene-M8001_RS22615	-1.5355	4.49084e-06	0.000349749	WP_003254376.1	cytochrome c-type biogenesis protein CcmH
gene-M8001_RS22630	-0.930739	0.00507	0.0749648	WP_003254379.1	cytochrome c maturation protein CcmE
gene-M8001_RS22635	-1.10693	0.00263939	0.0481551	WP_003254380.1	heme exporter protein CcmD
gene-M8001_RS22645	-0.452342	0.158726	0.528884	WP_003254382.1	heme exporter protein CcmB
gene-M8001_RS22650	-0.365813	0.233419	0.608686	WP_003254385.1	cytochrome c biogenesis heme-transporting ATPase CcmA
gene-M8001_RS22675	0.0921861	0.787481	0.93945	WP_003254393.1	chemotaxis protein CheW
gene-M8001_RS22720	0.267368	0.499959	0.823393	WP_003254406.1	RNA polymerase sigma factor FliA
gene-M8001_RS22725	0.428734	0.324927	0.69974	WP_003254408.1	flagellar synthesis regulator FleN
gene-M8001_RS22795	-0.115162	0.739102	0.922465	WP_003254414.1	flagellar biosynthesis protein FliQ
gene-M8001_RS22800	0.176521	0.582135	0.864336	WP_003254415.1	flagellar type III secretion system pore protein FliP
gene-M8001_RS22815	0.216498	0.492825	0.820274	WP_003254418.1	flagellar motor switch protein FliM
gene-M8001_RS22840	0.957988	0.044377	0.291113	WP_003254426.1	STAS domain-containing protein
gene-M8001_RS22860	0.394181	0.294452	0.670957	WP_003254434.1	flagellar motor switch protein FliG
gene-M8001_RS22870	0.760405	0.0295822	0.23459	WP_003254438.1	flagellar hook-basal body complex protein FliE
gene-M8001_RS22895	0.67735	0.106442	0.437587	WP_003254447.1	flagellar export chaperone FliS
gene-M8001_RS22920	-0.579177	0.0836321	0.392472	WP_003254453.1	ketoacyl-ACP synthase III
gene-M8001_RS22925	0.435117	0.273845	0.652611	WP_003254454.1	flagellar hook-associated protein 3
gene-M8001_RS22940	0.357116	0.393263	0.752768	WP_003254458.1	flagellar basal body P-ring protein FlgI
gene-M8001_RS22945	0.542008	0.202077	0.5754	WP_003254461.1	flagellar basal body L-ring protein FlgH
gene-M8001_RS22960	0.00821774	0.990781	1	WP_003254464.1	hypothetical protein
gene-M8001_RS22970	0.310021	0.460769	0.800259	WP_003254468.1	flagellar hook assembly protein FlgD
gene-M8001_RS22975	0.183934	0.642615	0.887996	WP_003254469.1	flagellar basal body rod protein FlgC
gene-M8001_RS23000	0.868321	0.0193195	0.177397	WP_003254479.1	flagellar biosynthesis anti-sigma factor FlgM
gene-M8001_RS23025	0.343047	0.307406	0.682572	WP_003254485.1	Bkd operon transcriptional regulator BkdR
gene-M8001_RS23455	0.853113	0.0223989	0.196011	WP_003254499.1	Arc family DNA-binding protein
gene-M8001_RS23460	-0.489282	0.177571	0.548698	WP_003254500.1	magnesium transporter
gene-M8001_RS23490	0.138742	0.691457	0.905408	WP_003254503.1	carbon storage regulator CsrA
gene-M8001_RS23495	-0.028758	0.938398	0.988006	WP_003254504.1	aspartate kinase
gene-M8001_RS23510	0.480447	0.10212	0.429726	WP_003254508.1	topoisomerase II
gene-M8001_RS23550	-0.653476	0.0240801	0.203317	WP_003254520.1	ABC transporter permease
gene-M8001_RS23555	-0.650529	0.0267247	0.217211	WP_003254523.1	ABC transporter permease
gene-M8001_RS23560	-0.637029	0.0639791	0.347753	WP_003254524.1	ABC transporter substrate-binding protein
gene-M8001_RS23565	-2.16813	0.000116551	0.00431322	WP_003254525.1	acetate--CoA ligase
gene-M8001_RS23570	1.94826	0.00846439	0.106247	WP_003254526.1	DUF2790 domain-containing protein
gene-M8001_RS23580	1.09315	0.00350219	0.0593325	WP_003254528.1	phenylalanine 4-monooxygenase
gene-M8001_RS23585	0.804077	0.0267914	0.217414	WP_003254532.1	4a-hydroxytetrahydrobiopterin dehydratase
gene-M8001_RS23590	-0.226847	0.433138	0.781236	WP_003254533.1	hypothetical protein
gene-M8001_RS23605	-0.3169	0.290526	0.667305	WP_003254537.1	LysR substrate-binding domain-containing protein
gene-M8001_RS23615	0.462334	0.261053	0.639738	WP_003254539.1	pseudouridine synthase
gene-M8001_RS23645	-0.348662	0.230286	0.603531	WP_003254549.1	YciI family protein
gene-M8001_RS23650	-0.236733	0.423574	0.774336	WP_003254551.1	response regulator transcription factor
gene-M8001_RS23680	2.49481	8.55848e-09	1.03856e-06	WP_003254563.1	DUF962 domain-containing protein
gene-M8001_RS23685	0.484631	0.320299	0.69721	WP_003254566.1	UDP-2%2C3-diacylglucosamine diphosphatase
gene-M8001_RS23745	-0.57471	0.0549271	0.322396	WP_003254585.1	LysR family transcriptional regulator
gene-M8001_RS23840	-0.492961	0.120209	0.460538	WP_003254607.1	carboxylate/amino acid/amine transporter
gene-M8001_RS23845	-0.0495259	0.842717	0.960738	WP_003254608.1	FMN-dependent NADH-azoreductase
gene-M8001_RS23855	-0.317156	0.269919	0.649165	WP_003254610.1	LysR family transcriptional regulator
gene-M8001_RS23880	0.973883	0.0572449	0.330791	WP_003254615.1	putative porin
gene-M8001_RS23920	-0.419315	0.242145	0.617855	WP_003254624.1	MaoC family dehydratase
gene-M8001_RS23945	3.38707	1.88502e-08	2.13827e-06	WP_003254632.1	DUF2790 domain-containing protein
gene-M8001_RS23970	-0.0241807	0.942639	0.988483	WP_003254641.1	hypothetical protein
gene-M8001_RS24000	0.929239	0.0039262	0.0625273	WP_003254651.1	DMT family transporter
gene-M8001_RS24025	0.77029	0.0375047	0.268987	WP_003254658.1	MoxR family ATPase
gene-M8001_RS24085	0.635516	0.0443263	0.291113	WP_003254676.1	YajD family HNH nuclease
gene-M8001_RS24150	0.438307	0.276869	0.656981	WP_003254695.1	GTP 3'%2C8-cyclase MoaA
gene-M8001_RS24165	0.347096	0.385338	0.748303	WP_003254698.1	molybdenum cofactor biosynthesis protein B
gene-M8001_RS06545	-0.184805	0.511741	0.829691	WP_003254716.1	helix-turn-helix domain-containing protein
gene-M8001_RS06525	-0.115094	0.803036	0.944525	WP_003254720.1	YhfL family protein
gene-M8001_RS06505	-0.784331	0.0819657	0.390065	WP_003254727.1	SH3 domain-containing protein
gene-M8001_RS06480	0.300185	0.477638	0.81032	WP_003254733.1	phosphoribosylaminoimidazolesuccinocarboxamide synthase
gene-M8001_RS06465	-0.60624	0.0841269	0.39251	WP_003254739.1	4-hydroxy-tetrahydrodipicolinate synthase
gene-M8001_RS06460	-0.425843	0.159739	0.530227	WP_003254741.1	glycine cleavage system protein R
gene-M8001_RS06450	0.058639	0.823086	0.954202	WP_003254744.1	AI-2E family transporter
gene-M8001_RS06445	-0.31689	0.335812	0.709956	WP_003254745.1	sulfurtransferase TusA family protein
gene-M8001_RS06435	-0.350919	0.273692	0.652611	WP_003254747.1	quinolinate synthase NadA
gene-M8001_RS06400	-0.534446	0.0858518	0.395737	WP_003254753.1	7-carboxy-7-deazaguanine synthase QueE
gene-M8001_RS06395	-0.144189	0.724949	0.917929	WP_003254754.1	tol-pal system protein YbgF
gene-M8001_RS06390	0.129024	0.780878	0.936536	WP_003254755.1	peptidoglycan-associated lipoprotein Pal
gene-M8001_RS06375	-0.200013	0.495323	0.821549	WP_003254760.1	protein TolR
gene-M8001_RS06365	-0.232642	0.452097	0.795093	WP_003254764.1	tol-pal system-associated acyl-CoA thioesterase
gene-M8001_RS06360	-0.081686	0.789655	0.940467	WP_003254766.1	Holliday junction branch migration DNA helicase RuvB
gene-M8001_RS06355	-0.166151	0.578965	0.862661	WP_003254768.1	Holliday junction branch migration protein RuvA
gene-M8001_RS06345	-0.342031	0.318522	0.695418	WP_003254770.1	YebC/PmpR family DNA-binding transcriptional regulator
gene-M8001_RS06230	0.220493	0.533021	0.838247	WP_003254799.1	DUF6502 family protein
gene-M8001_RS06150	-0.183346	0.643618	0.887996	WP_003254821.1	hypothetical protein
gene-M8001_RS06145	-0.0513091	0.89659	0.977698	WP_003254823.1	ribonucleotide-diphosphate reductase subunit beta
gene-M8001_RS06115	-0.0484798	0.88598	0.972512	WP_003254832.1	TRAP transporter small permease
gene-M8001_RS06005	1.11635	0.0071814	0.0943893	WP_003254864.1	hypothetical protein
gene-M8001_RS05950	-0.0175345	0.959334	0.993485	WP_003254879.1	ABC transporter ATP-binding protein
gene-M8001_RS05890	-0.287096	0.490849	0.818291	WP_003254889.1	ATP-dependent DNA helicase DinG
gene-M8001_RS05880	0.315024	0.383721	0.747456	WP_003254892.1	DUF1145 domain-containing protein
gene-M8001_RS05755	-0.211009	0.470039	0.805194	WP_003254918.1	hypothetical protein
gene-M8001_RS05750	-0.441692	0.18065	0.552216	WP_003254920.1	dCTP deaminase
gene-M8001_RS05745	0.0592539	0.886965	0.972512	WP_003254922.1	cold-shock protein
gene-M8001_RS05700	0.415919	0.234913	0.611055	WP_003254939.1	response regulator transcription factor
gene-M8001_RS05690	-0.751928	0.0569331	0.330086	WP_003254941.1	argininosuccinate synthase
gene-M8001_RS05675	0.144518	0.66211	0.896442	WP_003254944.1	ribonuclease T
gene-M8001_RS05670	-0.209034	0.610472	0.875854	WP_003254945.1	peroxiredoxin
gene-M8001_RS05665	0.265196	0.470872	0.805842	WP_003254947.1	bacterioferritin-associated ferredoxin
gene-M8001_RS05660	0.488142	0.17045	0.542321	WP_003254948.1	bacterioferritin
gene-M8001_RS05635	-0.275839	0.368469	0.734124	WP_003254957.1	Cys-tRNA(Pro) deacylase
gene-M8001_RS05630	-0.857514	0.0299162	0.236162	WP_003254959.1	aquaporin
gene-M8001_RS05565	-0.0891412	0.761909	0.929841	WP_003254981.1	transcriptional regulator MetR
gene-M8001_RS05545	0.701095	0.0191342	0.176089	WP_003254987.1	amino acid permease
gene-M8001_RS05535	0.572699	0.145654	0.50775	WP_003254989.1	PadR family transcriptional regulator
gene-M8001_RS05405	-0.531574	0.191619	0.562767	WP_003255025.1	IMP dehydrogenase
gene-M8001_RS05400	0.0955845	0.742758	0.924549	WP_003255027.1	hypothetical protein
gene-M8001_RS05370	-0.633631	0.211127	0.584444	WP_003255037.1	bifunctional 4-hydroxy-2-oxoglutarate aldolase/2-dehydro-3-deoxy-phosphogluconate aldolase
gene-M8001_RS05350	0.969913	0.052381	0.314185	WP_003255044.1	D-hexose-6-phosphate mutarotase
gene-M8001_RS05340	1.11225	0.0790898	0.384256	WP_003255047.1	sn-glycerol-3-phosphate ABC transporter ATP-binding protein UgpC
gene-M8001_RS05330	1.21603	0.0446161	0.291746	WP_003255050.1	sugar ABC transporter permease
gene-M8001_RS05300	-0.254664	0.565753	0.858917	WP_003255057.1	phosphogluconate dehydratase
gene-M8001_RS05290	0.336784	0.4444	0.788215	WP_003255059.1	sigma-70 family RNA polymerase sigma factor
gene-M8001_RS05265	-0.0801778	0.84455	0.96121	WP_003255067.1	arginine-ornithine antiporter
gene-M8001_RS05235	-0.188541	0.539654	0.843807	WP_003255078.1	sigma-54-dependent transcriptional regulator
gene-M8001_RS05190	1.73369	6.19654e-05	0.00267098	WP_003255089.1	aminomethyl-transferring glycine dehydrogenase
gene-M8001_RS05170	-0.267514	0.342977	0.715686	WP_003255094.1	RDD family protein
gene-M8001_RS05130	-0.295035	0.382248	0.74731	WP_003255106.1	HU family DNA-binding protein
gene-M8001_RS05080	-0.399002	0.299373	0.673911	WP_003255119.1	UDP-N-acetylglucosamine 1-carboxyvinyltransferase
gene-M8001_RS05075	-0.479236	0.174434	0.546633	WP_003255121.1	BolA family transcriptional regulator
gene-M8001_RS05030	-0.308263	0.372816	0.737889	WP_003255131.1	lipopolysaccharide transport periplasmic protein LptA
gene-M8001_RS05020	-0.367705	0.266016	0.645352	WP_003255133.1	RNA polymerase factor sigma-54
gene-M8001_RS05015	0.651932	0.0789888	0.384122	WP_003255135.1	ribosome-associated translation inhibitor RaiA
gene-M8001_RS05010	0.379282	0.304853	0.680603	WP_003255137.1	PTS IIA-like nitrogen regulatory protein PtsN
gene-M8001_RS04965	-0.60078	0.0822291	0.390065	WP_003255152.1	ribosome-associated protein
gene-M8001_RS04935	-0.555529	0.0878614	0.398661	WP_003255161.1	rod shape-determining protein MreD
gene-M8001_RS04925	-0.930574	0.0190407	0.175849	WP_003255163.1	rod shape-determining protein MreB
gene-M8001_RS04920	-0.310076	0.315732	0.691822	WP_003255165.1	Asp-tRNA(Asn)/Glu-tRNA(Gln) amidotransferase subunit GatC
gene-M8001_RS04895	-0.369923	0.262655	0.642538	WP_003255172.1	amino acid permease
gene-M8001_RS04880	0.0216397	0.941409	0.988375	WP_003255175.1	GNAT family N-acetyltransferase
gene-M8001_RS04865	1.42868	0.00257521	0.0473149	WP_003255178.1	ArsR family transcriptional regulator
gene-M8001_RS04840	0.116009	0.794619	0.941918	WP_003255185.1	LysE/ArgO family amino acid transporter
gene-M8001_RS04835	0.143813	0.73378	0.921669	WP_003255187.1	superoxide dismutase [Fe]
gene-M8001_RS04765	-0.185449	0.532516	0.838247	WP_003255215.1	two-component system response regulator ColR
gene-M8001_RS04750	-0.430199	0.38029	0.745437	WP_003255232.1	fumarate hydratase
gene-M8001_RS04705	0.265595	0.362865	0.729363	WP_003255244.1	response regulator transcription factor
gene-M8001_RS04695	-0.259027	0.392913	0.752768	WP_003255248.1	SIMPL domain-containing protein
gene-M8001_RS04670	-0.108204	0.730071	0.919979	WP_003255257.1	ABC transporter permease subunit
gene-M8001_RS03155	1.5174	1.12637e-05	0.000716753	WP_003255276.1	CoA-acylating methylmalonate-semialdehyde dehydrogenase
gene-M8001_RS03145	0.587906	0.160001	0.530512	WP_003255278.1	LysR family transcriptional regulator
gene-M8001_RS03115	0.960857	0.00508383	0.0749648	WP_003255284.1	hypothetical protein
gene-M8001_RS03110	-0.0456413	0.864493	0.966497	WP_003255285.1	multidrug effflux MFS transporter
gene-M8001_RS03060	0.150611	0.622618	0.879486	WP_003255298.1	pyrophosphatase
gene-M8001_RS02995	0.437502	0.211354	0.584444	WP_003255318.1	translation initiation factor Sui1
gene-M8001_RS02955	-0.844002	0.0670222	0.356495	WP_003255333.1	acetyl-CoA carboxylase biotin carboxylase subunit
gene-M8001_RS02910	-0.123252	0.764721	0.930656	WP_003255347.1	YceK/YidQ family lipoprotein
gene-M8001_RS02905	-0.107498	0.712044	0.913065	WP_003255348.1	flavin prenyltransferase UbiX
gene-M8001_RS02885	0.806197	0.0518595	0.313834	WP_003255355.1	ethanolamine permease
gene-M8001_RS02870	0.549629	0.0800087	0.386919	WP_003255360.1	GNAT family N-acetyltransferase
gene-M8001_RS02865	-0.0394196	0.90399	0.977698	WP_003255361.1	DedA family protein
gene-M8001_RS02855	-1.9167	9.44438e-07	8.21346e-05	WP_003255365.1	inorganic diphosphatase
gene-M8001_RS02810	-0.43663	0.183684	0.554254	WP_003255380.1	exodeoxyribonuclease VII small subunit
gene-M8001_RS02775	-0.285504	0.331764	0.706879	WP_003255389.1	GTP cyclohydrolase II
gene-M8001_RS02755	0.0367029	0.921049	0.981825	WP_003255393.1	transcription antitermination factor NusB
gene-M8001_RS02750	0.100658	0.780841	0.936536	WP_003255395.1	6%2C7-dimethyl-8-ribityllumazine synthase
gene-M8001_RS02745	0.120037	0.748592	0.925848	WP_003255398.1	bifunctional 3%2C4-dihydroxy-2-butanone-4-phosphate synthase/GTP cyclohydrolase II
gene-M8001_RS02740	-0.0335041	0.911068	0.978833	WP_003255399.1	riboflavin synthase
gene-M8001_RS02730	-0.64062	0.0420754	0.28439	WP_003255402.1	transcriptional regulator NrdR
gene-M8001_RS02665	-0.449192	0.177839	0.54909	WP_003255419.1	sugar nucleotide-binding protein
gene-M8001_RS02645	0.545964	0.124626	0.47055	WP_003255426.1	helix-turn-helix transcriptional regulator
gene-M8001_RS02605	0.144683	0.685138	0.904673	WP_003255436.1	formate dehydrogenase subunit beta
gene-M8001_RS02580	0.253846	0.469182	0.805062	WP_003255446.1	single-stranded DNA-binding protein
gene-M8001_RS02565	0.242431	0.477225	0.810071	WP_003255449.1	bacterioferritin
gene-M8001_RS02555	0.404385	0.41031	0.767108	WP_003255451.1	50S ribosomal protein L17
gene-M8001_RS02550	0.226452	0.645361	0.888492	WP_003255452.1	DNA-directed RNA polymerase subunit alpha
gene-M8001_RS02545	0.200877	0.682737	0.904673	WP_003255453.1	30S ribosomal protein S4
gene-M8001_RS02540	0.120781	0.800208	0.943368	WP_003255454.1	30S ribosomal protein S11
gene-M8001_RS02535	0.151557	0.744281	0.924658	WP_003255457.1	30S ribosomal protein S13
gene-M8001_RS02520	0.0680766	0.880536	0.970151	WP_003255461.1	50S ribosomal protein L15
gene-M8001_RS02515	-0.0307049	0.945454	0.989645	WP_003255463.1	50S ribosomal protein L30
gene-M8001_RS02510	-0.00723574	0.987291	1	WP_003255465.1	30S ribosomal protein S5
gene-M8001_RS02505	-0.0956499	0.839138	0.960645	WP_003255467.1	50S ribosomal protein L18
gene-M8001_RS02500	-0.179294	0.695153	0.907054	WP_003255469.1	50S ribosomal protein L6
gene-M8001_RS02495	-0.122636	0.780926	0.936536	WP_003255471.1	30S ribosomal protein S8
gene-M8001_RS02490	0.969037	0.0599475	0.33766	WP_003255472.1	30S ribosomal protein S14
gene-M8001_RS02485	0.861843	0.108149	0.439761	WP_003255474.1	50S ribosomal protein L5
gene-M8001_RS02480	0.829685	0.104514	0.434532	WP_003255476.1	50S ribosomal protein L24
gene-M8001_RS02470	0.740974	0.13961	0.495656	WP_003255478.1	30S ribosomal protein S17
gene-M8001_RS02460	0.67597	0.168699	0.539713	WP_003255479.1	50S ribosomal protein L16
gene-M8001_RS02455	0.595297	0.216253	0.588924	WP_003255481.1	30S ribosomal protein S3
gene-M8001_RS02445	0.290559	0.531734	0.837486	WP_003255482.1	30S ribosomal protein S19
gene-M8001_RS02440	0.188148	0.686752	0.904673	WP_003255483.1	50S ribosomal protein L2
gene-M8001_RS02435	0.111326	0.812213	0.948017	WP_003255484.1	50S ribosomal protein L23
gene-M8001_RS02430	0.00255249	0.995945	1	WP_003255485.1	50S ribosomal protein L4
gene-M8001_RS02425	-0.0511736	0.914451	0.979398	WP_003255486.1	50S ribosomal protein L3
gene-M8001_RS02350	-0.86191	0.070818	0.36397	WP_003255489.1	elongation factor Tu
gene-M8001_RS02410	0.238557	0.589235	0.866648	WP_003255490.1	elongation factor G
gene-M8001_RS02400	-0.032735	0.939002	0.988313	WP_003255492.1	30S ribosomal protein S12
gene-M8001_RS02390	0.438098	0.381282	0.74598	WP_003255495.1	DNA-directed RNA polymerase subunit beta
gene-M8001_RS02385	0.41069	0.461426	0.800259	WP_003255496.1	50S ribosomal protein L7/L12
gene-M8001_RS02380	0.348952	0.542729	0.845975	WP_003255497.1	50S ribosomal protein L10
gene-M8001_RS02375	0.155847	0.760474	0.929841	WP_003255499.1	50S ribosomal protein L1
gene-M8001_RS02370	0.0453313	0.929406	0.985099	WP_003255500.1	50S ribosomal protein L11
gene-M8001_RS02365	-0.449623	0.221852	0.594807	WP_003255501.1	transcription termination/antitermination protein NusG
gene-M8001_RS02295	-0.524844	0.123733	0.468874	WP_003255509.1	peptidoglycan DD-metalloendopeptidase family protein
gene-M8001_RS02285	0.846219	0.00396637	0.0625273	WP_003255511.1	iron-sulfur cluster insertion protein ErpA
gene-M8001_RS02260	0.040845	0.933715	0.98606	WP_003255518.1	histidine triad nucleotide-binding protein
gene-M8001_RS02220	0.0120808	0.974451	0.999694	WP_003255531.1	aminodeoxychorismate/anthranilate synthase component II
gene-M8001_RS02200	-0.368131	0.34776	0.717521	WP_003255539.1	ribulose-phosphate 3-epimerase
gene-M8001_RS02195	0.787622	0.0158074	0.156812	WP_003255542.1	ABC transporter permease
gene-M8001_RS02180	1.49577	0.0171685	0.165286	WP_003255547.1	ABC transporter ATP-binding protein
gene-M8001_RS02135	-0.160642	0.654204	0.892221	WP_003255557.1	4-hydroxythreonine-4-phosphate dehydrogenase PdxA
gene-M8001_RS02130	0.0122813	0.978663	1	WP_003255558.1	16S rRNA (adenine(1518)-N(6)/adenine(1519)-N(6))-dimethyltransferase RsmA
gene-M8001_RS02125	0.565513	0.0600338	0.33766	WP_003255559.1	Co2+/Mg2+ efflux protein ApaG
gene-M8001_RS02110	1.18007	0.007811	0.101003	WP_003255563.1	PrkA family serine protein kinase
gene-M8001_RS02105	-0.0118201	0.977982	1	WP_003255564.1	YeaH/YhbH family protein
gene-M8001_RS02070	-0.532029	0.213226	0.586821	WP_003255575.1	30S ribosomal protein S21
gene-M8001_RS02060	-0.129093	0.737169	0.921994	WP_003255578.1	RNA polymerase sigma factor RpoD
gene-M8001_RS02040	0.0663362	0.851543	0.963377	WP_003255582.1	serine acetyltransferase
gene-M8001_RS02005	-1.36136	0.00755649	0.0983286	WP_003255592.1	pyrroloquinoline-quinone synthase PqqC
gene-M8001_RS01840	0.0561613	0.868619	0.967792	WP_003255640.1	LPS kinase
gene-M8001_RS01820	-0.208164	0.509128	0.828127	WP_003255648.1	lipopolysaccharide heptosyltransferase I
gene-M8001_RS01800	0.210041	0.692631	0.905575	WP_003255652.1	dihydrolipoyllysine-residue acetyltransferase
gene-M8001_RS01750	0.367763	0.281819	0.65943	WP_003255673.1	formaldehyde dehydrogenase%2C glutathione-independent
gene-M8001_RS01745	0.189325	0.516896	0.831431	WP_003255675.1	formyltetrahydrofolate deformylase
gene-M8001_RS01740	-0.0803979	0.783326	0.93767	WP_003255677.1	sarcosine oxidase subunit gamma family protein
gene-M8001_RS01725	0.30452	0.506037	0.826448	WP_003255680.1	sarcosine oxidase subunit beta family protein
gene-M8001_RS01720	0.632811	0.127566	0.47518	WP_003255681.1	serine hydroxymethyltransferase
gene-M8001_RS01705	-0.502217	0.223537	0.596857	WP_003255684.1	cell division protein ZapA
gene-M8001_RS01700	-0.280027	0.457213	0.797408	WP_003255686.1	hypothetical protein
gene-M8001_RS01660	0.187206	0.717226	0.91519	WP_003255697.1	dimethylglycine demethylation protein DgcA
gene-M8001_RS01655	-0.14578	0.927818	0.984661	WP_003255698.1	DUF5943 domain-containing protein
gene-M8001_RS01650	0.918454	0.0524658	0.314185	WP_003255700.1	dipeptidase
gene-M8001_RS01600	1.1548	0.00899885	0.110225	WP_003255717.1	hypothetical protein
gene-M8001_RS01570	-0.189517	0.545168	0.846662	WP_003255729.1	imidazole glycerol phosphate synthase subunit HisF
gene-M8001_RS01565	-0.256882	0.4423	0.787698	WP_003255731.1	1-(5-phosphoribosyl)-5-[(5-phosphoribosylamino)methylideneamino]imidazole-4-carboxamide isomerase
gene-M8001_RS01550	-0.406573	0.223621	0.596857	WP_003255736.1	imidazoleglycerol-phosphate dehydratase HisB
gene-M8001_RS01530	0.0990466	0.777541	0.935919	WP_003255742.1	oxidative damage protection protein
gene-M8001_RS01415	0.268363	0.567753	0.859035	WP_003255784.1	OprD family porin
gene-M8001_RS01370	-0.0480893	0.874173	0.968811	WP_003255794.1	ADP compounds hydrolase NudE
gene-M8001_RS01335	-0.618328	0.163386	0.53431	WP_003255806.1	phosphoenolpyruvate carboxykinase
gene-M8001_RS01320	0.306806	0.408465	0.765207	WP_003255812.1	S4 domain-containing protein
gene-M8001_RS01310	-0.236092	0.443185	0.788215	WP_003255817.1	30S ribosomal protein S6--L-glutamate ligase
gene-M8001_RS01305	-0.165764	0.62092	0.879192	WP_003255819.1	ATP-binding protein
gene-M8001_RS01300	-0.156014	0.646274	0.888492	WP_003255821.1	two-component system response regulator OmpR
gene-M8001_RS01275	0.813785	0.310516	0.686557	WP_003255829.1	molybdopterin-binding protein
gene-M8001_RS01260	1.245	0.0126393	0.135425	WP_003255833.1	FMNH2-dependent alkanesulfonate monooxygenase
gene-M8001_RS01250	-0.30835	0.387969	0.749295	WP_003255835.1	NADPH-dependent FMN reductase
gene-M8001_RS01245	0.570564	0.064414	0.349389	WP_003255836.1	peroxiredoxin
gene-M8001_RS01235	0.392604	0.334209	0.708276	WP_003255840.1	taurine ABC transporter substrate-binding protein
gene-M8001_RS01210	0.206438	0.499585	0.823393	WP_003255846.1	serine O-acetyltransferase
gene-M8001_RS01200	-0.0334247	0.91439	0.979398	WP_003255849.1	cystine ABC transporter permease
gene-M8001_RS01140	0.246576	0.468583	0.805047	WP_003255866.1	4-aminobutyrate--2-oxoglutarate transaminase
gene-M8001_RS01075	0.64417	0.165822	0.536384	WP_003255871.1	hypothetical protein
gene-M8001_RS01020	0.419389	0.303053	0.67781	WP_003255887.1	Rsd/AlgQ family anti-sigma factor
gene-M8001_RS00995	-0.0325168	0.911301	0.978833	WP_003255895.1	hydroxymethylbilane synthase
gene-M8001_RS00970	1.07918	0.00142031	0.0304987	WP_003255900.1	TIGR02647 family protein
gene-M8001_RS00950	-0.725274	0.182274	0.552967	WP_003255905.1	DUF1656 domain-containing protein
gene-M8001_RS00930	-0.615911	0.0395278	0.274834	WP_003255912.1	WYL domain-containing protein
gene-M8001_RS00905	-0.0608667	0.83439	0.957571	WP_003255921.1	hypothetical protein
gene-M8001_RS00895	0.258974	0.404346	0.761688	WP_003256004.1	type I secretion system permease/ATPase
gene-M8001_RS18955	-0.609159	0.114106	0.450077	WP_003256021.1	OsmC domain/YcaO domain-containing protein
gene-M8001_RS18960	0.972698	0.00255255	0.0470643	WP_003256023.1	(2Fe-2S)-binding protein
gene-M8001_RS19075	0.47484	0.353301	0.723328	WP_003256068.1	amino acid synthesis family protein
gene-M8001_RS19095	0.184142	0.561519	0.857729	WP_003256073.1	carboxymuconolactone decarboxylase family protein
gene-M8001_RS19125	1.28246	0.0313921	0.243394	WP_003256079.1	Lrp/AsnC family transcriptional regulator
gene-M8001_RS19165	0.350754	0.308691	0.684539	WP_003256095.1	nucleotide 5'-monophosphate nucleosidase PpnN
gene-M8001_RS19615	-0.0415516	0.899757	0.977698	WP_003256147.1	GntR family transcriptional regulator
gene-M8001_RS19710	-0.379276	0.198624	0.570717	WP_003256176.1	response regulator
gene-M8001_RS19760	0.0925189	0.76987	0.933143	WP_003256190.1	hypothetical protein
gene-M8001_RS19985	1.09004	0.0206983	0.187832	WP_003256222.1	MbtH family protein
gene-M8001_RS12110	-0.364766	0.306377	0.681799	WP_003259400.1	ATP-dependent Clp endopeptidase proteolytic subunit ClpP
gene-M8001_RS09195	0.32756	0.24168	0.617574	WP_003260859.1	lipopolysaccharide assembly protein LapA domain-containing protein
gene-M8001_RS00115	0.976204	0.00265906	0.048177	WP_003298409.1	hypothetical protein
gene-M8001_RS00120	1.11604	0.00394751	0.0625273	WP_003298411.1	hypothetical protein
gene-M8001_RS00130	0.757462	0.218501	0.591848	WP_003298414.1	phosphoethanolamine--lipid A transferase
gene-M8001_RS16390	0.712715	0.0154726	0.155534	WP_004374214.1	translesion DNA synthesis-associated protein ImuA
gene-M8001_RS16415	1.05168	0.00410013	0.0642476	WP_004374230.1	CoA transferase subunit A
gene-M8001_RS16435	0.388441	0.426058	0.776041	WP_004374238.1	hypothetical protein
gene-M8001_RS16575	0.205496	0.464067	0.802087	WP_004374302.1	LysR family transcriptional regulator
gene-M8001_RS16625	1.52825	0.000157083	0.00550105	WP_004374325.1	benzoate 1%2C2-dioxygenase large subunit
gene-M8001_RS17060	0.645191	0.0685724	0.360696	WP_004374444.1	MgtC/SapB family protein
gene-M8001_RS17065	-0.573483	0.0701392	0.362813	WP_004374446.1	sterol desaturase family protein
gene-M8001_RS17090	-0.401545	0.518255	0.832591	WP_004374456.1	stress-induced protein
gene-M8001_RS17200	-0.340307	0.500064	0.823393	WP_004374494.1	hypothetical protein
gene-M8001_RS17225	0.16785	1	1	WP_004374508.1	DUF485 domain-containing protein
gene-M8001_RS17660	-0.0405326	0.902552	0.977698	WP_004374903.1	Lrp/AsnC family transcriptional regulator
gene-M8001_RS17680	-0.184	0.523413	0.834211	WP_004374921.1	LysR family transcriptional regulator
gene-M8001_RS18140	0.215231	0.65754	0.894363	WP_004375838.1	quinohemoprotein amine dehydrogenase subunit gamma
gene-M8001_RS02245	-0.127715	0.691139	0.905408	WP_004376171.1	OsmC family protein
gene-M8001_RS12470	0.852393	0.00636415	0.0878522	WP_004573790.1	DUF2970 domain-containing protein
gene-M8001_RS12320	0.353409	0.229799	0.602861	WP_004573881.1	patatin-like phospholipase family protein
gene-M8001_RS23365	0.366333	0.287945	0.664821	WP_004573968.1	IS630 family transposase
gene-M8001_RS13965	-0.0984144	0.740465	0.923657	WP_004574211.1	hypothetical protein
gene-M8001_RS13950	-0.0333836	0.912492	0.979087	WP_004574212.1	phosphate ABC transporter permease subunit PstC
gene-M8001_RS13050	0.294538	0.498769	0.823393	WP_004574290.1	antibiotic biosynthesis monooxygenase
gene-M8001_RS07935	0.222435	0.528257	0.835408	WP_004574732.1	2%2C3%2C4%2C5-tetrahydropyridine-2%2C6-dicarboxylate N-succinyltransferase
gene-M8001_RS07910	-0.697271	0.0537892	0.317862	WP_004574734.1	succinyl-diaminopimelate desuccinylase
gene-M8001_RS10440	-0.62704	0.0828326	0.391079	WP_004574892.1	acetyl-CoA carboxylase%2C carboxyltransferase subunit beta
gene-M8001_RS06920	-0.395352	0.20653	0.579551	WP_004575120.1	division/cell wall cluster transcriptional repressor MraZ
gene-M8001_RS28120	0.102472	0.725364	0.918008	WP_004575195.1	pyridoxal kinase PdxY
gene-M8001_RS27925	-0.283151	0.359303	0.726402	WP_004575206.1	4-hydroxybenzoate octaprenyltransferase
gene-M8001_RS27785	-0.178998	0.589201	0.866648	WP_004575216.1	acetylglutamate kinase
gene-M8001_RS00490	-0.0123774	0.969887	0.997019	WP_004575263.1	gamma carbonic anhydrase family protein
gene-M8001_RS18590	0.0777113	0.810702	0.947423	WP_004575310.1	DHA2 family efflux MFS transporter permease subunit
gene-M8001_RS13310	-0.461653	0.807881	0.945821	WP_004575389.1	hypothetical protein
gene-M8001_RS13380	1.1033	0.0033371	0.0570918	WP_004575400.1	amino acid permease
gene-M8001_RS13415	-0.261427	0.447899	0.79198	WP_004575404.1	YebC/PmpR family DNA-binding transcriptional regulator
gene-M8001_RS13565	-0.0890472	0.746734	0.925525	WP_004575417.1	DUF2986 domain-containing protein
gene-M8001_RS07820	-2.2231	6.24436e-09	8.35463e-07	WP_004575467.1	adenylate kinase
gene-M8001_RS26860	-0.264828	0.389263	0.750562	WP_004575476.1	insulinase family protein
gene-M8001_RS26815	-0.186704	0.580441	0.863539	WP_004575478.1	tRNA (guanosine(46)-N7)-methyltransferase TrmB
gene-M8001_RS26725	0.0474656	0.912406	0.979087	WP_004575488.1	malate dehydrogenase
gene-M8001_RS05160	-0.540771	0.110513	0.444798	WP_004575655.1	LPS export ABC transporter permease LptF
gene-M8001_RS03650	0.192988	0.560089	0.856847	WP_004575710.1	AAA family ATPase
gene-M8001_RS03385	-0.146662	0.618721	0.878021	WP_004575721.1	dephospho-CoA kinase
gene-M8001_RS06340	-0.283325	0.481406	0.811887	WP_004575741.1	aspartate--tRNA ligase
gene-M8001_RS22985	0.539632	0.107694	0.439365	WP_004575768.1	protein-glutamate O-methyltransferase CheR
gene-M8001_RS24665	-0.0318967	0.926795	0.9846	WP_004575787.1	DNA/RNA nuclease SfsA
gene-M8001_RS09060	-0.480084	0.103647	0.432663	WP_004575803.1	YheU family protein
gene-M8001_RS09055	2.13552	0.00016075	0.00559194	WP_004575804.1	carbon storage regulator CsrA
gene-M8001_RS27450	0.0961829	0.729408	0.919561	WP_004575827.1	iron donor protein CyaY
gene-M8001_RS27290	-0.317512	0.311718	0.688047	WP_004575832.1	extracellular solute-binding protein
gene-M8001_RS27120	-0.0593348	0.811661	0.948017	WP_004575846.1	sugar O-acetyltransferase
gene-M8001_RS04160	0.333003	0.248939	0.62707	WP_004575870.1	glutathione peroxidase
gene-M8001_RS01450	0.522894	0.1571	0.527849	WP_004575922.1	transcriptional regulator
gene-M8001_RS09890	-0.247948	0.398791	0.758343	WP_004575950.1	low molecular weight phosphotyrosine protein phosphatase
gene-M8001_RS28330	1.82705	0.000139363	0.0049808	WP_004575963.1	heavy-metal-associated domain-containing protein
gene-M8001_RS24455	-0.440866	0.136995	0.490287	WP_004575991.1	tRNA (uridine(54)-C5)-methyltransferase TrmA
gene-M8001_RS25080	0.0798133	0.835083	0.957571	WP_004576004.1	histone deacetylase
gene-M8001_RS25025	0.00968857	0.957586	0.993485	WP_004576152.1	TetR/AcrR family transcriptional regulator
gene-M8001_RS25020	0.0915895	0.783279	0.93767	WP_004576153.1	NADH:flavin oxidoreductase
gene-M8001_RS25010	-0.110673	0.791191	0.940899	WP_004576155.1	amino acid ABC transporter ATP-binding protein
gene-M8001_RS25000	-0.603086	0.0703063	0.363145	WP_004576157.1	amino acid ABC transporter permease
gene-M8001_RS06245	-0.457281	0.11415	0.450077	WP_004576169.1	30S ribosomal protein S12 methylthiotransferase RimO
gene-M8001_RS02085	-0.0439661	0.883068	0.971407	WP_004576188.1	dihydroneopterin aldolase
gene-M8001_RS02120	0.369126	0.214398	0.587402	WP_004576191.1	symmetrical bis(5'-nucleosyl)-tetraphosphatase
gene-M8001_RS16455	0.947038	0.021786	0.192159	WP_004576287.1	CpsD/CapB family tyrosine-protein kinase
gene-M8001_RS16425	0.509734	0.194657	0.567517	WP_004576289.1	TIGR00366 family protein
gene-M8001_RS04550	0.117145	0.762099	0.929841	WP_004576298.1	outer membrane protein assembly factor BamB
gene-M8001_RS04465	-0.396108	0.165659	0.536384	WP_004576300.1	tRNA (cytosine(32)/uridine(32)-2'-O)-methyltransferase TrmJ
gene-M8001_RS04395	-0.281447	0.328135	0.702486	WP_004576350.1	ABC transporter permease subunit
gene-M8001_RS01315	-0.0667688	0.937181	0.987393	WP_004576370.1	ATP-dependent zinc protease
gene-M8001_RS14080	-1.25032	0.0307075	0.240506	WP_004576476.1	iron-containing alcohol dehydrogenase
gene-M8001_RS26105	-0.066486	0.837999	0.959552	WP_004576614.1	MliC family protein
gene-M8001_RS16160	-0.683128	0.0865405	0.395917	WP_004576638.1	type VI secretion system lipoprotein TssJ
gene-M8001_RS15115	0.70794	0.0347459	0.257533	WP_004576713.1	GNAT family N-acetyltransferase
gene-M8001_RS26355	-0.474428	0.128658	0.476464	WP_004576729.1	bifunctional demethylmenaquinone methyltransferase/2-methoxy-6-polyprenyl-1%2C4-benzoquinol methylase UbiE
gene-M8001_RS23540	-0.425851	0.165815	0.536384	WP_004576734.1	transcriptional regulator ArgR
gene-M8001_RS26585	-0.310706	0.324732	0.69974	WP_004576741.1	S41 family peptidase
gene-M8001_RS11490	0.138181	0.646429	0.888492	WP_004576768.1	agmatinase
gene-M8001_RS06060	-0.580526	0.157607	0.528531	WP_004576806.1	acetolactate synthase large subunit
gene-M8001_RS17675	-1.00378	0.00417114	0.0647768	WP_004576806.1	acetolactate synthase large subunit
gene-M8001_RS06175	0.890756	0.0130907	0.138555	WP_004576834.1	dienelactone hydrolase family protein
gene-M8001_RS08385	-0.334474	0.246961	0.62438	WP_004576849.1	cell division protein FtsB
gene-M8001_RS25340	-0.1618	0.636277	0.885563	WP_004576852.1	LrgB family protein
gene-M8001_RS25320	-0.394255	0.250163	0.627755	WP_004576854.1	glutamate-5-semialdehyde dehydrogenase
gene-M8001_RS25095	-0.141408	0.639139	0.886699	WP_004576856.1	drug/metabolite exporter YedA
gene-M8001_RS23785	0.877922	0.0387928	0.272543	WP_004576871.1	BrnA antitoxin family protein
gene-M8001_RS25190	-0.363288	0.247327	0.624966	WP_004576914.1	sel1 repeat family protein
gene-M8001_RS25560	-0.161842	0.81211	0.948017	WP_004576962.1	bacterioferritin
gene-M8001_RS25595	-0.826788	0.0178602	0.16883	WP_004576969.1	ABC transporter ATP-binding protein
gene-M8001_RS03090	-0.0856472	0.793599	0.941564	WP_004576995.1	Cu(I)-responsive transcriptional regulator
gene-M8001_RS03020	0.169216	0.589652	0.866648	WP_004577004.1	hypothetical protein
gene-M8001_RS09465	-0.00669714	0.977017	0.999694	WP_004577080.1	hypothetical protein
gene-M8001_RS22580	0.133564	0.633904	0.884315	WP_004577113.1	GFA family protein
gene-M8001_RS26465	0.692427	0.0434148	0.28785	WP_004577162.1	urocanate hydratase
gene-M8001_RS15100	0.994011	0.00782011	0.101003	WP_004577197.1	sigma-70 family RNA polymerase sigma factor
gene-M8001_RS24390	0.555835	0.111859	0.446034	WP_004577217.1	carbon starvation protein A
gene-M8001_RS20630	0.800552	0.0882153	0.399572	WP_004577263.1	hypothetical protein
gene-M8001_RS20700	0.324642	0.449453	0.793654	WP_004577272.1	2%2C5-dihydroxypyridine 5%2C6-dioxygenase
gene-M8001_RS03205	-0.229733	0.454348	0.796063	WP_004577288.1	murein biosynthesis integral membrane protein MurJ
gene-M8001_RS25945	-0.431006	0.199551	0.57212	WP_004577390.1	multidrug efflux SMR transporter
gene-M8001_RS10755	0.0505465	0.878287	0.968811	WP_004577437.1	DUF3144 domain-containing protein
gene-M8001_RS18330	-0.191965	0.545439	0.846662	WP_004577524.1	RidA family protein
gene-M8001_RS18335	-0.372353	0.297703	0.671881	WP_004577525.1	U32 family peptidase
gene-M8001_RS08905	0.240877	0.421118	0.774003	WP_004577645.1	helix-turn-helix transcriptional regulator
gene-M8001_RS22830	0.440221	0.333925	0.708276	WP_004577674.1	Hpt domain-containing protein
gene-M8001_RS21950	-0.0971372	0.803289	0.944525	WP_008091902.1	succinate dehydrogenase%2C cytochrome b556 subunit
gene-M8001_RS03360	-0.0679704	0.857126	0.964577	WP_008091951.1	DUF3094 domain-containing protein
gene-M8001_RS05965	-0.317977	0.395533	0.754802	WP_008097482.1	high-affinity branched-chain amino acid ABC transporter permease LivH
gene-M8001_RS00195	-0.131499	0.922238	0.98229	WP_009395904.1	OprO/OprP family phosphate-selective porin
gene-M8001_RS24465	0.263093	0.36496	0.730761	WP_009682255.1	protocatechuate 3%2C4-dioxygenase subunit beta
gene-M8001_RS23760	0.824662	0.0713691	0.36397	WP_009683677.1	hypothetical protein
gene-M8001_RS22330	-0.0263545	0.92836	0.984875	WP_009683910.1	adenine phosphoribosyltransferase
gene-M8001_RS27855	0.113634	0.763932	0.930491	WP_009684531.1	RidA family protein
gene-M8001_RS05920	0.292169	0.317777	0.694467	WP_009684613.1	glycine zipper 2TM domain-containing protein
gene-M8001_RS04665	-0.236074	0.412915	0.768947	WP_009685150.1	ABC transporter permease subunit
gene-M8001_RS25310	-0.214878	0.5552	0.853899	WP_009685825.1	ribosome silencing factor
gene-M8001_RS13010	0.983422	0.014372	0.147334	WP_010487132.1	glutathione S-transferase
gene-M8001_RS13085	0.500581	0.107808	0.43948	WP_010487163.1	NAD-dependent succinate-semialdehyde dehydrogenase
gene-M8001_RS13100	0.666152	0.164134	0.534947	WP_010487168.1	DUF1330 domain-containing protein
gene-M8001_RS00025	0.0977387	0.755975	0.92884	WP_010951424.1	tRNA uridine-5-carboxymethylaminomethyl(34) synthesis GTPase MnmE
gene-M8001_RS00030	-0.453904	0.355482	0.723791	WP_010951425.1	membrane protein insertase YidC
gene-M8001_RS00035	-0.710787	0.114201	0.450077	WP_010951426.1	membrane protein insertion efficiency factor YidD
gene-M8001_RS00050	-0.408892	0.241436	0.617556	WP_010951427.1	chromosomal replication initiator protein DnaA
gene-M8001_RS00080	0.243987	0.514866	0.830209	WP_010951429.1	TniB family NTP-binding protein
gene-M8001_RS00085	0.127158	0.661309	0.896062	WP_010951430.1	TniQ family protein
gene-M8001_RS00090	0.178771	0.546738	0.848062	WP_010951431.1	DNA binding protein
gene-M8001_RS00095	-0.174454	0.556947	0.855379	WP_010951432.1	TIGR04255 family protein
gene-M8001_RS00110	0.06408	0.799666	0.943368	WP_010951435.1	hypothetical protein
gene-M8001_RS00140	0.0700827	0.825565	0.955286	WP_010951438.1	cation diffusion facilitator family transporter
gene-M8001_RS00160	0.305554	0.37885	0.744576	WP_010951441.1	heavy metal sensor histidine kinase
gene-M8001_RS00175	-0.252399	0.531008	0.836739	WP_010951444.1	phospholipid carrier-dependent glycosyltransferase
gene-M8001_RS00190	1.23845	0.0167813	0.163001	WP_010951447.1	LysR family transcriptional regulator
gene-M8001_RS00200	0.0865451	0.831421	0.956767	WP_010951450.1	hypothetical protein
gene-M8001_RS00205	0.844762	0.119098	0.45796	WP_010951451.1	hypothetical protein
gene-M8001_RS00210	-0.00140812	1	1	WP_010951452.1	heavy metal translocating P-type ATPase
gene-M8001_RS00220	0.168348	0.664284	0.897523	WP_010951454.1	CusA/CzcA family heavy metal efflux RND transporter
gene-M8001_RS00225	0.291667	0.702578	0.908569	WP_010951455.1	efflux RND transporter periplasmic adaptor subunit
gene-M8001_RS00265	0.4657	0.181449	0.552651	WP_010951459.1	RcnB family protein
gene-M8001_RS00270	-0.49082	0.124615	0.47055	WP_010951460.1	sigma-54-dependent Fis family transcriptional regulator
gene-M8001_RS00275	0.60292	0.13126	0.480606	WP_010951461.1	MBL fold metallo-hydrolase
gene-M8001_RS00280	0.419	0.191759	0.562767	WP_010951462.1	NAD(P)/FAD-dependent oxidoreductase
gene-M8001_RS00290	0.175908	0.603749	0.873645	WP_010951464.1	LysR family transcriptional regulator
gene-M8001_RS00300	0.72013	0.0621449	0.342694	WP_010951466.1	MFS transporter
gene-M8001_RS00305	-0.28738	0.360656	0.727817	WP_010951467.1	1-acyl-sn-glycerol-3-phosphate acyltransferase
gene-M8001_RS00315	-0.0286906	0.940531	0.988375	WP_010951468.1	glycine--tRNA ligase subunit beta
gene-M8001_RS00325	-0.220089	0.43572	0.781813	WP_010951469.1	DNA-3-methyladenine glycosylase I
gene-M8001_RS00330	0.0529061	0.855715	0.964552	WP_010951470.1	lysophospholipid acyltransferase
gene-M8001_RS00335	0.0615675	0.831234	0.956767	WP_010951471.1	tetratricopeptide repeat protein
gene-M8001_RS00340	-0.0292609	0.932606	0.985866	WP_010951472.1	Trk system potassium transporter TrkA
gene-M8001_RS00345	-0.431133	0.209742	0.584277	WP_010951473.1	16S rRNA (cytosine(967)-C(5))-methyltransferase RsmB
gene-M8001_RS00350	-0.355098	0.282432	0.659457	WP_010951474.1	methionyl-tRNA formyltransferase
gene-M8001_RS00360	0.400626	0.258329	0.636885	WP_010951475.1	DNA-processing protein DprA
gene-M8001_RS00365	-0.193035	0.514146	0.830209	WP_010951476.1	L-threonylcarbamoyladenylate synthase
gene-M8001_RS00380	0.24365	0.425328	0.77573	WP_010951478.1	NADPH:quinone reductase
gene-M8001_RS00385	-0.559955	0.11283	0.447036	WP_010951479.1	oxygen-dependent coproporphyrinogen oxidase
gene-M8001_RS00390	-0.112833	0.743855	0.924658	WP_010951480.1	shikimate dehydrogenase
gene-M8001_RS00395	0.135353	0.675732	0.901322	WP_010951481.1	SulP family inorganic anion transporter
gene-M8001_RS00405	0.185076	0.605011	0.874333	WP_010951483.1	choline-sulfatase
gene-M8001_RS00410	0.809418	0.018783	0.174693	WP_010951485.1	LysR family transcriptional regulator
gene-M8001_RS00415	0.102824	0.849179	0.963055	WP_010951486.1	NAD(P)H-binding protein
gene-M8001_RS00425	-0.0895661	0.858865	0.965442	WP_010951488.1	tryptophan synthase subunit alpha
gene-M8001_RS00430	-0.0885442	0.872853	0.968811	WP_010951489.1	tryptophan synthase subunit beta
gene-M8001_RS00435	0.602432	0.0440382	0.289774	WP_010951490.1	LysR family transcriptional regulator
gene-M8001_RS00455	0.72405	0.0464793	0.296678	WP_010951493.1	LLM class flavin-dependent oxidoreductase
gene-M8001_RS00470	0.739275	0.0785522	0.383325	WP_010951495.1	lipoprotein
gene-M8001_RS00475	-0.469602	0.229556	0.60283	WP_010951496.1	lipoprotein
gene-M8001_RS00485	0.167304	0.630999	0.883211	WP_010951498.1	HAD family hydrolase
gene-M8001_RS00500	0.0526017	0.894227	0.976569	WP_010951500.1	YheV family putative metal-binding protein
gene-M8001_RS00505	1.31967	3.72194e-05	0.00178175	WP_010951502.1	PA0069 family radical SAM protein
gene-M8001_RS00525	1.36191	0.0062897	0.0874492	WP_010951505.1	cytochrome c oxidase subunit II
gene-M8001_RS00530	0.10786	0.850231	0.963298	WP_010951506.1	cytochrome c oxidase subunit I
gene-M8001_RS00540	-0.413316	0.478973	0.810497	WP_010951507.1	cytochrome c oxidase subunit 3
gene-M8001_RS00555	-0.837748	0.084439	0.393267	WP_010951509.1	hypothetical protein
gene-M8001_RS00560	-0.638826	0.211063	0.584444	WP_010951510.1	COX15/CtaA family protein
gene-M8001_RS00565	-0.512046	0.271619	0.649844	WP_010951511.1	heme o synthase
gene-M8001_RS00575	0.0411318	0.908699	0.978419	WP_010951512.1	MetQ/NlpA family ABC transporter substrate-binding protein
gene-M8001_RS00580	-0.211702	0.577309	0.862189	WP_010951513.1	ABC transporter permease
gene-M8001_RS00590	-0.0654344	0.853525	0.963377	WP_010951514.1	catalase HPII
gene-M8001_RS00595	-1.32005	9.18e-06	0.000603944	WP_010951515.1	lipoprotein
gene-M8001_RS00600	-0.368648	0.252369	0.629175	WP_010951516.1	zinc ABC transporter permease subunit ZnuB
gene-M8001_RS00605	-0.348115	0.283347	0.659457	WP_010951517.1	zinc ABC transporter ATP-binding protein ZnuC
gene-M8001_RS00615	-0.196792	0.530798	0.836739	WP_010951519.1	zinc ABC transporter substrate-binding protein
gene-M8001_RS00625	-0.117579	0.713305	0.913255	WP_010951520.1	DUF2782 domain-containing protein
gene-M8001_RS00630	0.0255732	0.942346	0.988375	WP_010951521.1	DNA polymerase I
gene-M8001_RS00635	-0.0599487	0.842462	0.960738	WP_010951522.1	ribosome biogenesis GTP-binding protein YihA/YsxC
gene-M8001_RS00650	-0.0268839	0.931828	0.985866	WP_010951523.1	thiol:disulfide interchange protein DsbA
gene-M8001_RS00660	-0.284226	0.337721	0.711835	WP_010951524.1	diguanylate cyclase
gene-M8001_RS00665	-0.0447675	0.883608	0.971407	WP_010951525.1	N-acetylmuramoyl-L-alanine amidase
gene-M8001_RS00675	-0.366722	0.229078	0.602365	WP_010951527.1	ATP-binding protein
gene-M8001_RS00680	0.116216	0.704867	0.909173	WP_010951528.1	sigma-54-dependent response regulator transcription factor AlgB
gene-M8001_RS00685	0.0946986	0.879564	0.969302	WP_010951529.1	BON domain-containing protein
gene-M8001_RS00700	0.22606	0.484703	0.814289	WP_010951530.1	inhibitor of vertebrate lysozyme family protein
gene-M8001_RS00705	-2.40051	4.26587e-05	0.00198744	WP_010951531.1	glutamate/aspartate:proton symporter GltP
gene-M8001_RS00710	-0.109113	0.716063	0.914457	WP_010951532.1	spore maturation protein
gene-M8001_RS00715	-0.18094	0.525075	0.834211	WP_010951533.1	ABC-type transport auxiliary lipoprotein family protein
gene-M8001_RS00720	-0.316148	0.284112	0.660155	WP_010951534.1	MCE family protein
gene-M8001_RS00725	-0.303348	0.277572	0.657138	WP_010951535.1	ATP-binding cassette domain-containing protein
gene-M8001_RS00730	-0.0109184	0.992065	1	WP_010951536.1	ABC transporter permease
gene-M8001_RS00735	0.0143569	0.956475	0.993485	WP_010951537.1	DUF2914 domain-containing protein
gene-M8001_RS00740	0.469302	0.145772	0.50775	WP_010951538.1	insulinase family protein
gene-M8001_RS00745	0.641951	0.0712325	0.36397	WP_010951539.1	Na/Pi cotransporter family protein
gene-M8001_RS00755	0.163905	0.635171	0.884798	WP_010951541.1	CitMHS family transporter
gene-M8001_RS00765	-0.476406	0.150172	0.514956	WP_010951543.1	DUF4105 domain-containing protein
gene-M8001_RS00775	-0.168225	0.592335	0.868447	WP_010951544.1	DUF2388 domain-containing protein
gene-M8001_RS00810	0.543611	0.0970347	0.416388	WP_010951546.1	LysR family transcriptional regulator
gene-M8001_RS00815	0.907274	0.00571723	0.0817329	WP_010951547.1	acyl-CoA dehydrogenase
gene-M8001_RS00820	0.538357	0.102634	0.429953	WP_010951548.1	CoA transferase
gene-M8001_RS00865	-0.251527	0.474905	0.809276	WP_010951550.1	FecR family protein
gene-M8001_RS00875	-0.131535	0.633633	0.884315	WP_010951552.1	GntR family transcriptional regulator
gene-M8001_RS00885	0.0636629	0.824187	0.954849	WP_010951554.1	EAL domain-containing protein
gene-M8001_RS00910	0.014038	1	1	WP_010951557.1	TauD/TfdA family dioxygenase
gene-M8001_RS00915	-0.0129055	0.957244	0.993485	WP_010951558.1	ABC transporter substrate-binding protein
gene-M8001_RS00920	0.409323	0.269516	0.648978	WP_010951559.1	ABC transporter ATP-binding protein
gene-M8001_RS00925	0.322504	0.451207	0.794687	WP_010951560.1	ABC transporter permease
gene-M8001_RS00940	-0.260977	0.413427	0.769062	WP_010951563.1	winged helix DNA-binding protein
gene-M8001_RS00945	-0.806741	0.012639	0.135425	WP_010951564.1	FUSC family protein
gene-M8001_RS00955	-0.366832	0.23945	0.6174	WP_010951565.1	HlyD family secretion protein
gene-M8001_RS00960	-0.288282	0.334205	0.708276	WP_010951566.1	TolC family protein
gene-M8001_RS00975	0.317538	0.284279	0.660155	WP_010951568.1	hypothetical protein
gene-M8001_RS00980	0.207301	0.474306	0.808648	WP_010951569.1	glutathione S-transferase
gene-M8001_RS00990	1.16248	0.000610564	0.0163381	WP_010951571.1	LytTR family DNA-binding domain-containing protein
gene-M8001_RS01000	-0.197666	0.488336	0.816222	WP_010951572.1	uroporphyrinogen-III synthase
gene-M8001_RS01010	-0.131725	0.68193	0.904673	WP_010951574.1	heme biosynthesis protein HemY
gene-M8001_RS01015	0.353509	0.295853	0.671444	WP_010951575.1	disulfide bond formation protein B
gene-M8001_RS01030	0.159111	0.677333	0.903039	WP_010951578.1	AlgP family protein
gene-M8001_RS01035	0.395062	0.215573	0.588009	WP_010951579.1	TIGR02444 family protein
gene-M8001_RS01040	-0.537999	0.154584	0.523579	WP_010951580.1	ATP-binding cassette domain-containing protein
gene-M8001_RS01045	-0.475923	0.137147	0.490495	WP_010951581.1	mechanosensitive ion channel family protein
gene-M8001_RS01050	0.257546	0.44422	0.788215	WP_010951582.1	LysE family transporter
gene-M8001_RS01060	0.758582	0.0754268	0.375275	WP_010951584.1	nodulation protein NfeD
gene-M8001_RS01080	0.380123	0.204542	0.578941	WP_010951586.1	CBS domain-containing protein
gene-M8001_RS01085	0.194979	0.536675	0.841612	WP_010951587.1	dipeptidase
gene-M8001_RS01095	0.819777	0.0418814	0.283446	WP_010951588.1	GntR family transcriptional regulator
gene-M8001_RS01100	0.62029	0.05282	0.314667	WP_010951589.1	fumarate reductase/succinate dehydrogenase flavoprotein subunit
gene-M8001_RS01105	0.399958	0.356489	0.723791	WP_010951590.1	ferredoxin family protein
gene-M8001_RS01110	0.752546	0.117372	0.456031	WP_010951591.1	ABC transporter substrate-binding protein
gene-M8001_RS01115	0.722291	0.0710244	0.36397	WP_010951592.1	ABC transporter permease
gene-M8001_RS01120	-0.316683	0.409948	0.766706	WP_010951593.1	ABC transporter ATP-binding protein
gene-M8001_RS01125	0.174064	0.735369	0.921961	WP_010951594.1	HEAT repeat domain-containing protein
gene-M8001_RS01130	-0.178393	0.74506	0.924658	WP_010951595.1	DUF971 domain-containing protein
gene-M8001_RS01135	0.171386	0.628235	0.882879	WP_010951596.1	NADP-dependent succinate-semialdehyde dehydrogenase
gene-M8001_RS01145	0.836943	0.0373568	0.268879	WP_010951597.1	response regulator
gene-M8001_RS01155	-0.0236676	0.937082	0.987393	WP_010951599.1	delta-9 fatty acid desaturase DesA
gene-M8001_RS01160	-0.300446	0.328222	0.702486	WP_010951600.1	EAL domain-containing protein
gene-M8001_RS01165	0.430834	0.291501	0.668358	WP_010951601.1	ABC transporter permease
gene-M8001_RS01170	0.417136	0.420017	0.773276	WP_010951602.1	ATP-binding cassette domain-containing protein
gene-M8001_RS01180	0.908124	0.197944	0.570391	WP_010951604.1	LLM class flavin-dependent oxidoreductase
gene-M8001_RS01190	0.208089	0.611877	0.875854	WP_010951606.1	SfnB family sulfur acquisition oxidoreductase
gene-M8001_RS01195	-0.405048	0.170151	0.542033	WP_010951607.1	L-cystine ABC transporter ATP-binding protein YecC
gene-M8001_RS01205	0.276661	0.353182	0.723328	WP_010951608.1	cystine ABC transporter substrate-binding protein
gene-M8001_RS01215	-0.0653654	0.826003	0.955286	WP_010951610.1	choline transporter BetT
gene-M8001_RS01220	0.481423	0.315638	0.691822	WP_010951611.1	taurine dioxygenase
gene-M8001_RS01225	0.453117	0.470185	0.805194	WP_010951612.1	taurine ABC transporter permease TauC
gene-M8001_RS01230	0.717203	0.0747281	0.373411	WP_010951613.1	taurine ABC transporter ATP-binding subunit
gene-M8001_RS01240	-0.173582	0.742454	0.924549	WP_010951614.1	OprD family porin
gene-M8001_RS01255	0.45137	0.195481	0.567984	WP_010951615.1	sulfonate ABC transporter substrate-binding protein
gene-M8001_RS01265	2.36984	0.000248186	0.00789656	WP_010951616.1	aliphatic sulfonate ABC transporter permease SsuC
gene-M8001_RS01270	0.648226	0.208183	0.58153	WP_010951617.1	aliphatic sulfonates ABC transporter ATP-binding protein
gene-M8001_RS01280	-0.182296	0.579546	0.862788	WP_010951618.1	TetR/AcrR family transcriptional regulator
gene-M8001_RS01290	-0.0772545	0.80766	0.945821	WP_010951620.1	PaaI family thioesterase
gene-M8001_RS01325	0.171621	0.571633	0.860345	WP_010951623.1	phosphatase PAP2 family protein
gene-M8001_RS01330	0.22102	0.482746	0.812967	WP_010951624.1	Hsp33 family molecular chaperone HslO
gene-M8001_RS01340	-0.127124	0.707377	0.909979	WP_010951625.1	thioesterase family protein
gene-M8001_RS01345	0.629459	0.0616396	0.341802	WP_010951626.1	glycine zipper domain-containing protein
gene-M8001_RS01350	-0.338181	0.283118	0.659457	WP_010951627.1	FdhF/YdeP family oxidoreductase
gene-M8001_RS01355	0.232919	0.54021	0.843957	WP_010951628.1	formate dehydrogenase accessory sulfurtransferase FdhD
gene-M8001_RS01360	0.966592	0.00505399	0.0749648	WP_010951629.1	peptidoglycan-binding protein LysM
gene-M8001_RS01365	-0.152043	0.581034	0.863539	WP_010951630.1	GMP/IMP nucleotidase
gene-M8001_RS01380	-0.198908	0.493076	0.820431	WP_010951632.1	YiiD C-terminal domain-containing protein
gene-M8001_RS01385	-0.218365	0.449767	0.793939	WP_010951633.1	sigma-54 dependent transcriptional regulator
gene-M8001_RS01390	-0.260541	0.372426	0.737889	WP_010951634.1	ATP-binding protein
gene-M8001_RS01395	0.911386	0.0183988	0.172361	WP_010951635.1	dTDP-4-dehydrorhamnose 3%2C5-epimerase
gene-M8001_RS01400	0.494661	0.116455	0.454391	WP_010951636.1	agmatine deiminase
gene-M8001_RS01410	0.327673	0.379876	0.74504	WP_010951637.1	TonB-dependent siderophore receptor
gene-M8001_RS01420	-0.120371	0.723335	0.916962	WP_010951638.1	FMN-binding glutamate synthase family protein
gene-M8001_RS01425	-0.0663826	1	1	WP_010951639.1	ATP-binding protein
gene-M8001_RS01430	0.309688	0.360448	0.727817	WP_010951640.1	response regulator
gene-M8001_RS01435	0.874382	0.056042	0.327466	WP_010951641.1	TonB-dependent siderophore receptor
gene-M8001_RS01460	0.565324	0.333355	0.708261	WP_010951644.1	type II toxin-antitoxin system RelE/ParE family toxin
gene-M8001_RS01465	0.746862	0.135055	0.486348	WP_010951645.1	helix-turn-helix domain-containing protein
gene-M8001_RS01475	-0.374203	0.358516	0.725655	WP_010951646.1	hypothetical protein
gene-M8001_RS01485	0.283558	0.355048	0.723687	WP_010951648.1	methyltransferase
gene-M8001_RS01490	-0.246653	0.381263	0.74598	WP_010951649.1	ABC transporter permease
gene-M8001_RS01495	-0.221252	0.461716	0.800259	WP_010951650.1	ABC transporter permease
gene-M8001_RS01500	0.106479	0.771967	0.93436	WP_010951651.1	ABC transporter substrate-binding protein
gene-M8001_RS01505	0.0382249	0.901077	0.977698	WP_010951652.1	ABC transporter ATP-binding protein
gene-M8001_RS01510	0.737541	0.0823086	0.390065	WP_010951653.1	GABA permease
gene-M8001_RS01535	0.638899	0.0397379	0.275368	WP_010951654.1	A/G-specific adenine glycosylase
gene-M8001_RS01540	0.744582	0.0209458	0.18942	WP_010951655.1	AsmA family protein
gene-M8001_RS01545	-1.35895	6.2449e-05	0.00267098	WP_010951656.1	OFA family MFS transporter
gene-M8001_RS01555	-0.435236	0.18425	0.555004	WP_010951658.1	imidazole glycerol phosphate synthase subunit HisH
gene-M8001_RS01560	-0.65662	0.0239237	0.202904	WP_010951659.1	DUF2164 domain-containing protein
gene-M8001_RS01575	0.13191	0.660785	0.896043	WP_010951660.1	choline ABC transporter ATP-binding protein
gene-M8001_RS01585	0.306989	0.305142	0.680732	WP_010951661.1	choline ABC transporter substrate-binding protein
gene-M8001_RS01590	1.26683	0.00362647	0.0604566	WP_010951662.1	L-serine ammonia-lyase
gene-M8001_RS01595	0.146684	0.741719	0.924359	WP_010951663.1	GlxA family transcriptional regulator
gene-M8001_RS01610	0.464539	0.268811	0.648477	WP_010951666.1	thioesterase family protein
gene-M8001_RS01615	0.103645	0.860706	0.966382	WP_010951667.1	L-carnitine dehydrogenase
gene-M8001_RS01620	0.482506	0.218089	0.591848	WP_010951668.1	3-keto-5-aminohexanoate cleavage protein
gene-M8001_RS01665	-0.195983	0.543497	0.846052	WP_010951673.1	dimethylglycine demethylation protein DgcB
gene-M8001_RS01675	0.711941	0.0806855	0.389118	WP_010951675.1	electron transfer flavoprotein subunit beta
gene-M8001_RS01680	-0.576502	0.21355	0.587094	WP_010951676.1	RHS repeat-associated core domain-containing protein
gene-M8001_RS01685	0.569895	0.146562	0.508281	WP_010951677.1	glycine-betaine demethylase subunit GbcA
gene-M8001_RS01695	0.12316	0.809742	0.946937	WP_010951679.1	methyl-accepting chemotaxis protein
gene-M8001_RS01710	-0.262735	0.434731	0.781813	WP_010951680.1	methyl-accepting chemotaxis protein McpH
gene-M8001_RS01715	0.456053	0.127937	0.475639	WP_010951681.1	low specificity L-threonine aldolase
gene-M8001_RS01730	0.607166	0.134883	0.486165	WP_010951682.1	sarcosine oxidase subunit delta
gene-M8001_RS01735	0.106407	0.743588	0.924658	WP_010951683.1	sarcosine oxidase subunit alpha
gene-M8001_RS01755	0.407718	0.503843	0.825448	WP_010951684.1	hypothetical protein
gene-M8001_RS01770	-0.111717	0.687316	0.904673	WP_010951687.1	acyltransferase
gene-M8001_RS01775	-0.31544	0.412253	0.767988	WP_010951688.1	ATP-dependent zinc protease
gene-M8001_RS01780	0.30321	0.358375	0.72565	WP_010951689.1	IS110 family transposase
gene-M8001_RS01785	-0.0976479	0.739507	0.922704	WP_010951690.1	glutathione S-transferase
gene-M8001_RS01790	-0.0526487	0.853103	0.963377	WP_010951691.1	peptide-methionine (S)-S-oxide reductase MsrA
gene-M8001_RS01795	0.263791	0.389333	0.750562	WP_010951692.1	EAL domain-containing protein
gene-M8001_RS01805	-0.205464	0.687788	0.904683	WP_010951693.1	pyruvate dehydrogenase (acetyl-transferring)%2C homodimeric type
gene-M8001_RS01810	0.189637	0.567477	0.859035	WP_010951694.1	bifunctional [glutamate--ammonia ligase]-adenylyl-L-tyrosine phosphorylase/[glutamate--ammonia-ligase] adenylyltransferase
gene-M8001_RS01815	-0.159538	0.630142	0.883211	WP_010951695.1	lipopolysaccharide heptosyltransferase II
gene-M8001_RS01825	-0.200347	0.554096	0.853043	WP_010951696.1	glycosyltransferase family 4 protein
gene-M8001_RS01830	0.0113016	0.976029	0.999694	WP_010951697.1	lipopolysaccharide core heptose(I) kinase RfaP
gene-M8001_RS01835	0.0491037	0.887997	0.973039	WP_010951698.1	LPS kinase
gene-M8001_RS01845	0.0132707	0.972888	0.999068	WP_010951699.1	LPS kinase
gene-M8001_RS01850	0.194989	0.670135	0.899373	WP_010951700.1	hypothetical protein
gene-M8001_RS01860	0.496116	0.229063	0.602365	WP_010951701.1	PepSY domain-containing protein
gene-M8001_RS01865	0.550946	0.256143	0.634403	WP_010951702.1	TonB-dependent siderophore receptor
gene-M8001_RS01870	-0.670302	0.0464874	0.296678	WP_010951703.1	FecR family protein
gene-M8001_RS01875	-0.403478	0.315132	0.691531	WP_010951704.1	RNA polymerase sigma factor
gene-M8001_RS01880	-1.85483	3.95312e-08	4.12548e-06	WP_010951705.1	3'-5' exonuclease
gene-M8001_RS01885	-1.28165	5.7407e-05	0.00251722	WP_010951706.1	DUF294 nucleotidyltransferase-like domain-containing protein
gene-M8001_RS01895	-0.315963	0.338365	0.711835	WP_010951708.1	malate synthase G
gene-M8001_RS01900	1.12663	0.00701067	0.0935592	WP_010951709.1	glycine cleavage system protein R
gene-M8001_RS01905	0.0237141	0.958708	0.993485	WP_010951710.1	EamA family transporter RarD
gene-M8001_RS01915	0.32216	0.296998	0.671739	WP_010951712.1	TOBE domain-containing protein
gene-M8001_RS01920	0.468032	0.293565	0.670676	WP_010951713.1	ComF family protein
gene-M8001_RS01925	-0.108333	0.785892	0.938976	WP_010951714.1	biotin synthase BioB
gene-M8001_RS01930	-0.245745	0.523028	0.834211	WP_010951715.1	8-amino-7-oxononanoate synthase
gene-M8001_RS01935	-0.221954	0.505553	0.826448	WP_010951716.1	alpha/beta fold hydrolase
gene-M8001_RS01940	-0.275128	0.398102	0.75786	WP_010951717.1	malonyl-ACP O-methyltransferase BioC
gene-M8001_RS01945	0.170827	0.557906	0.855499	WP_010951718.1	dethiobiotin synthase
gene-M8001_RS01955	1.51353	0.000820359	0.0206794	WP_010951720.1	phenylacyl-CoA dehydrogenase
gene-M8001_RS01965	1.52271	2.53539e-05	0.00130987	WP_010951722.1	acyl-CoA dehydrogenase C-terminal domain-containing protein
gene-M8001_RS01970	0.571761	0.0956183	0.414946	WP_010951723.1	LysR family transcriptional regulator
gene-M8001_RS01975	1.21574	0.00343686	0.0584154	WP_010951724.1	aminotransferase class III-fold pyridoxal phosphate-dependent enzyme
gene-M8001_RS01990	-1.74545	0.00100244	0.0242047	WP_010951726.1	S9 family peptidase
gene-M8001_RS01995	-1.50055	0.00378996	0.0616075	WP_010951727.1	pyrroloquinoline quinone biosynthesis protein PqqE
gene-M8001_RS02000	-1.24504	0.00669899	0.0915061	WP_010951728.1	pyrroloquinoline quinone biosynthesis peptide chaperone PqqD
gene-M8001_RS02010	-1.04902	0.0115199	0.127896	WP_010951729.1	pyrroloquinoline quinone biosynthesis protein PqqB
gene-M8001_RS02020	-0.00620194	0.978757	1	WP_010951730.1	pyrroloquinoline quinone biosynthesis protein PqqF
gene-M8001_RS02025	0.0572099	0.847194	0.962639	WP_010951731.1	carbon-nitrogen hydrolase family protein
gene-M8001_RS02030	0.612749	0.0416595	0.283415	WP_010951732.1	FAD-dependent oxidoreductase
gene-M8001_RS02035	-0.191203	0.608407	0.875046	WP_010951733.1	Lrp/AsnC family transcriptional regulator
gene-M8001_RS02055	0.155528	0.62756	0.882406	WP_010951734.1	bifunctional diguanylate cyclase/phosphodiesterase
gene-M8001_RS02065	-0.117067	0.722482	0.916962	WP_010951735.1	DNA primase
gene-M8001_RS02075	-0.711836	0.0374622	0.268987	WP_010951736.1	tRNA (adenosine(37)-N6)-threonylcarbamoyltransferase complex transferase subunit TsaD
gene-M8001_RS02080	-0.00224529	0.975816	0.999694	WP_010951737.1	glycerol-3-phosphate 1-O-acyltransferase PlsY
gene-M8001_RS02090	0.0578988	0.845529	0.962014	WP_010951738.1	2-amino-4-hydroxy-6-hydroxymethyldihydropteridine diphosphokinase
gene-M8001_RS02095	0.0958566	0.755829	0.92884	WP_010951739.1	CCA tRNA nucleotidyltransferase
gene-M8001_RS02100	-0.25602	0.536405	0.841612	WP_010951740.1	SpoVR family protein
gene-M8001_RS02115	0.484226	0.0987452	0.421302	WP_010951742.1	thiosulfate sulfurtransferase GlpE
gene-M8001_RS02150	0.0405433	0.905069	0.977698	WP_010951744.1	phosphotransferase
gene-M8001_RS02155	0.280693	0.352172	0.722056	WP_010951745.1	nucleotidyltransferase family protein
gene-M8001_RS02160	0.11887	0.686844	0.904673	WP_010951746.1	TerB family tellurite resistance protein
gene-M8001_RS02165	-0.0328139	0.897883	0.977698	WP_010951747.1	alpha/beta hydrolase family protein
gene-M8001_RS02170	0.289381	0.345559	0.716301	WP_010951748.1	sensor histidine kinase
gene-M8001_RS02185	1.03034	0.0432139	0.286883	WP_010951750.1	ABC transporter substrate-binding protein
gene-M8001_RS02190	0.848852	0.0607637	0.338383	WP_010951751.1	ABC transporter permease
gene-M8001_RS02205	-0.357802	0.338235	0.711835	WP_010951753.1	phosphoglycolate phosphatase
gene-M8001_RS02210	-0.154253	0.663443	0.897131	WP_010951754.1	anthranilate synthase component I
gene-M8001_RS02215	-0.294194	0.346822	0.71708	WP_010951755.1	autotransporter domain-containing SGNH/GDSL hydrolase family protein
gene-M8001_RS02225	0.11481	0.728417	0.919257	WP_010951756.1	anthranilate phosphoribosyltransferase
gene-M8001_RS02230	0.279022	0.384444	0.74791	WP_010951757.1	indole-3-glycerol phosphate synthase TrpC
gene-M8001_RS02235	-0.337793	0.289895	0.667297	WP_010951758.1	lipoate--protein ligase family protein
gene-M8001_RS02240	-0.0590557	0.826274	0.955286	WP_010951759.1	cAMP-activated global transcriptional regulator CRP
gene-M8001_RS02250	-0.104575	0.714432	0.913255	WP_010951760.1	DUF2157 domain-containing protein
gene-M8001_RS02255	0.0528227	0.884279	0.971436	WP_010951761.1	2-polyprenyl-3-methyl-6-methoxy-1%2C4-benzoquinone monooxygenase
gene-M8001_RS02265	-0.129796	0.705831	0.909173	WP_010951762.1	SDR family oxidoreductase
gene-M8001_RS02270	0.339441	0.230879	0.604478	WP_010951763.1	nitronate monooxygenase family protein
gene-M8001_RS02275	0.197865	0.574742	0.860922	WP_010951764.1	protoporphyrinogen oxidase HemJ
gene-M8001_RS02280	0.183877	0.572816	0.860345	WP_010951765.1	N-acetyl-gamma-glutamyl-phosphate reductase
gene-M8001_RS02290	-0.619681	0.0459028	0.295152	WP_010951767.1	anhydro-N-acetylmuramic acid kinase
gene-M8001_RS02300	-0.495633	0.180285	0.5517	WP_010951769.1	tyrosine--tRNA ligase
gene-M8001_RS02320	-0.579416	0.0675242	0.357707	WP_010951770.1	bifunctional biotin--[acetyl-CoA-carboxylase] ligase/biotin operon repressor BirA
gene-M8001_RS02325	-0.437625	0.143674	0.504504	WP_010951771.1	pantothenate kinase
gene-M8001_RS02360	-0.57178	0.117229	0.456031	WP_010951773.1	preprotein translocase subunit SecE
gene-M8001_RS02395	0.677761	0.170113	0.542033	WP_010951774.1	DNA-directed RNA polymerase subunit beta'
gene-M8001_RS02415	0.467288	0.312786	0.689091	WP_010951775.1	elongation factor Tu
gene-M8001_RS02525	0.207628	0.645106	0.888492	WP_010951776.1	preprotein translocase subunit SecY
gene-M8001_RS02560	-0.0100338	0.969166	0.997019	WP_010951777.1	catalase
gene-M8001_RS02570	-0.199882	0.556717	0.855379	WP_010951778.1	excinuclease ABC subunit UvrA
gene-M8001_RS02575	0.0114151	0.973519	0.999374	WP_010951779.1	MFS transporter
gene-M8001_RS02595	1.33758	0.000108709	0.00417092	WP_010951782.1	SDR family NAD(P)-dependent oxidoreductase
gene-M8001_RS02610	-0.0452806	0.908791	0.978419	WP_010951783.1	formate dehydrogenase subunit gamma
gene-M8001_RS02620	0.79192	0.0137519	0.142376	WP_010951785.1	L-seryl-tRNA(Sec) selenium transferase
gene-M8001_RS02625	0.101992	0.758318	0.929186	WP_010951786.1	selenocysteine-specific translation elongation factor
gene-M8001_RS02640	-0.642975	0.0602809	0.33766	WP_010951788.1	alanine:cation symporter family protein
gene-M8001_RS02670	-0.462989	0.124299	0.470469	WP_010951790.1	NAD-dependent epimerase/dehydratase family protein
gene-M8001_RS02675	0.214584	0.586058	0.866182	WP_010951791.1	helix-turn-helix transcriptional regulator
gene-M8001_RS02680	0.336937	0.315758	0.691822	WP_010951792.1	MFS transporter
gene-M8001_RS02685	-1.5312	0.0380651	0.270604	WP_010951793.1	outer membrane beta-barrel protein
gene-M8001_RS02695	-0.514759	0.1342	0.485011	WP_010951795.1	ABC transporter permease
gene-M8001_RS02700	-0.963598	0.00191007	0.0378964	WP_010951796.1	ABC transporter ATP-binding protein
gene-M8001_RS02705	-0.574307	0.0504546	0.310829	WP_010951797.1	DUF2796 domain-containing protein
gene-M8001_RS02710	-0.151033	0.692631	0.905575	WP_010951798.1	hypothetical protein
gene-M8001_RS02715	0.233398	0.414366	0.769726	WP_010951799.1	thioredoxin
gene-M8001_RS02760	-0.518552	0.163546	0.53431	WP_010951802.1	thiamine-phosphate kinase
gene-M8001_RS02765	-0.557431	0.0899953	0.405873	WP_010951803.1	phosphatidylglycerophosphatase A
gene-M8001_RS02770	-0.296532	0.356712	0.723791	WP_010951804.1	transporter substrate-binding domain-containing protein
gene-M8001_RS02780	-0.301837	0.29607	0.671444	WP_010951805.1	hypothetical protein
gene-M8001_RS02785	-0.32895	0.278338	0.657138	WP_010951806.1	cobalamin-binding protein
gene-M8001_RS02800	-0.628306	0.0822142	0.390065	WP_010951809.1	1-deoxy-D-xylulose-5-phosphate synthase
gene-M8001_RS02805	-0.49854	0.109868	0.443462	WP_010951810.1	(2E%2C6E)-farnesyl diphosphate synthase
gene-M8001_RS02815	0.133447	0.692271	0.905558	WP_010951811.1	3%2C4-dihydroxy-2-butanone-4-phosphate synthase
gene-M8001_RS02825	-0.32764	0.386411	0.749143	WP_010951813.1	alpha/beta hydrolase
gene-M8001_RS02830	0.217529	0.5337	0.839062	WP_010951814.1	sensor histidine kinase
gene-M8001_RS02835	0.0428601	0.931401	0.985811	WP_010951815.1	response regulator transcription factor
gene-M8001_RS02840	0.422462	0.235787	0.612412	WP_010951816.1	TonB-dependent siderophore receptor
gene-M8001_RS02845	1.49586	0.00129737	0.0286851	WP_010951817.1	hemerythrin domain-containing protein
gene-M8001_RS02860	-0.187756	0.545474	0.846662	WP_010951819.1	zinc-dependent peptidase
gene-M8001_RS02875	0.479473	0.136939	0.490287	WP_010951820.1	ethanolamine ammonia-lyase subunit EutC
gene-M8001_RS02880	0.546349	0.162398	0.532985	WP_010951821.1	ethanolamine ammonia-lyase subunit EutB
gene-M8001_RS02890	0.626854	0.106115	0.437322	WP_010951822.1	aldehyde dehydrogenase
gene-M8001_RS02900	-0.0733586	0.826678	0.955286	WP_010951824.1	UDP-N-acetylmuramate:L-alanyl-gamma-D-glutamyl-meso-diaminopimelate ligase
gene-M8001_RS02915	1.08086	0.00376687	0.0616075	WP_010951825.1	oxidoreductase
gene-M8001_RS02930	-1.271	0.00630188	0.0874492	WP_010951828.1	acetoin dehydrogenase dihydrolipoyllysine-residue acetyltransferase subunit
gene-M8001_RS02935	-1.15335	0.0162766	0.160855	WP_010951829.1	alpha-ketoacid dehydrogenase subunit beta
gene-M8001_RS02940	-0.695291	0.0757099	0.375303	WP_010951830.1	thiamine pyrophosphate-dependent dehydrogenase E1 component subunit alpha
gene-M8001_RS02945	-0.11123	0.792929	0.941452	WP_010951831.1	NAD(+)/NADH kinase
gene-M8001_RS02950	0.413491	0.327141	0.701645	WP_010951832.1	sigma-54-dependent Fis family transcriptional regulator
gene-M8001_RS02960	-1.00613	0.0424509	0.285273	WP_010951833.1	acetyl-CoA carboxylase biotin carboxyl carrier protein
gene-M8001_RS02965	-1.1959	0.00470247	0.0715181	WP_010951834.1	type II 3-dehydroquinate dehydratase
gene-M8001_RS02970	-0.455856	0.154778	0.523579	WP_010951835.1	protein-disulfide reductase DsbD
gene-M8001_RS02975	0.0727238	0.804782	0.944525	WP_010951836.1	methyl-accepting chemotaxis protein
gene-M8001_RS02980	-0.266693	0.418112	0.772551	WP_010951837.1	diguanylate cyclase
gene-M8001_RS02990	0.10133	0.728042	0.919257	WP_010951839.1	NUDIX hydrolase
gene-M8001_RS03000	0.0643312	0.84784	0.962639	WP_010951840.1	arginine decarboxylase
gene-M8001_RS03005	0.360473	0.392969	0.752768	WP_010951841.1	transposase
gene-M8001_RS03010	-0.315737	0.343117	0.715686	WP_010951842.1	MATE family efflux transporter
gene-M8001_RS03015	-0.251307	0.479985	0.810538	WP_010951843.1	alpha-2-macroglobulin family protein
gene-M8001_RS03025	-0.133551	0.67932	0.903744	WP_010951845.1	peptidoglycan glycosyltransferase PbpC
gene-M8001_RS03035	0.848987	0.0123913	0.134145	WP_010951847.1	response regulator transcription factor
gene-M8001_RS03040	0.905454	0.0132541	0.14	WP_010951848.1	A24 family peptidase
gene-M8001_RS03045	0.712601	0.0501159	0.310829	WP_010951849.1	DUF4136 domain-containing protein
gene-M8001_RS03055	0.130937	0.683288	0.904673	WP_010951851.1	methyltransferase domain-containing protein
gene-M8001_RS03065	0.0160437	0.962869	0.995216	WP_010951853.1	MaoC/PaaZ C-terminal domain-containing protein
gene-M8001_RS03075	0.565295	0.0692462	0.361688	WP_010951855.1	acetyl-CoA C-acetyltransferase
gene-M8001_RS03080	0.316073	0.291387	0.668358	WP_010951856.1	helix-turn-helix transcriptional regulator
gene-M8001_RS03085	0.867775	0.0178413	0.16883	WP_010951857.1	methyl-accepting chemotaxis protein
gene-M8001_RS03095	0.950245	0.00154993	0.032611	WP_010951858.1	heavy metal translocating P-type ATPase
gene-M8001_RS03100	-0.00741085	1	1	WP_010951859.1	hypothetical protein
gene-M8001_RS03105	2.37155	4.08137e-10	6.86986e-08	WP_010951860.1	cation transporter
gene-M8001_RS03120	0.288972	0.362193	0.728618	WP_010951861.1	ArsR family transcriptional regulator
gene-M8001_RS03125	0.0548303	0.86436	0.966497	WP_010951862.1	adenosine deaminase
gene-M8001_RS03130	0.369368	0.269406	0.648978	WP_010951863.1	SDR family oxidoreductase
gene-M8001_RS03135	-0.0635352	0.898512	0.977698	WP_010951864.1	IMPACT family protein
gene-M8001_RS03150	1.78533	0.000204828	0.00685123	WP_010951866.1	aspartate aminotransferase family protein
gene-M8001_RS03195	0.153504	0.616985	0.87699	WP_010951867.1	MlaD family protein
gene-M8001_RS03210	-0.195602	0.518574	0.832614	WP_010951868.1	bifunctional riboflavin kinase/FAD synthetase
gene-M8001_RS03215	0.0266383	0.946348	0.98985	WP_010951869.1	isoleucine--tRNA ligase
gene-M8001_RS03225	0.174637	0.618275	0.878021	WP_010951871.1	FKBP-type peptidyl-prolyl cis-trans isomerase
gene-M8001_RS03230	0.207561	0.602162	0.872948	WP_010951872.1	4-hydroxy-3-methylbut-2-enyl diphosphate reductase
gene-M8001_RS03235	0.477175	0.468937	0.805047	WP_010951873.1	GspH/FimT family pseudopilin
gene-M8001_RS03245	0.424126	0.22777	0.602365	WP_010951875.1	prepilin-type N-terminal cleavage/methylation domain-containing protein
gene-M8001_RS03250	0.490219	0.16329	0.53431	WP_010951876.1	hypothetical protein
gene-M8001_RS03255	-0.47785	0.112558	0.446298	WP_010951877.1	prepilin-type N-terminal cleavage/methylation domain-containing protein
gene-M8001_RS03260	0.0321798	0.904818	0.977698	WP_010951878.1	glycine oxidase ThiO
gene-M8001_RS03265	-0.170417	0.626926	0.882303	WP_010951879.1	amidase
gene-M8001_RS03270	-0.358675	0.370187	0.735574	WP_010951880.1	Zn-dependent hydrolase
gene-M8001_RS03275	-0.00658895	0.976604	0.999694	WP_010951881.1	ABC transporter ATP-binding protein
gene-M8001_RS03280	-0.29779	0.48365	0.813567	WP_010951882.1	ABC transporter ATP-binding protein
gene-M8001_RS03295	0.260123	0.489187	0.816564	WP_010951883.1	ABC transporter substrate-binding protein
gene-M8001_RS03300	0.11713	0.733603	0.921669	WP_010951884.1	FCD domain-containing protein
gene-M8001_RS03320	-0.297131	0.392614	0.752768	WP_010951886.1	peptidoglycan editing factor PgeF
gene-M8001_RS03325	1.01055	0.0111727	0.125645	WP_010951887.1	ATP-dependent chaperone ClpB
gene-M8001_RS03380	-0.187288	0.545057	0.846662	WP_010951889.1	DNA gyrase inhibitor YacG
gene-M8001_RS03390	0.220213	0.479142	0.810497	WP_010951890.1	A24 family peptidase
gene-M8001_RS03395	0.908241	0.00988197	0.116562	WP_010951891.1	type II secretion system F family protein
gene-M8001_RS03400	-0.0308172	0.942958	0.988611	WP_010951892.1	pilin
gene-M8001_RS03415	-0.169944	0.667522	0.898651	WP_010951894.1	cold shock domain-containing protein
gene-M8001_RS03425	0.34471	0.312438	0.689054	WP_010951895.1	IS66-like element ISPpu15 family transposase
gene-M8001_RS21110	-0.346663	0.51405	0.830209	WP_010951895.1	IS66-like element ISPpu15 family transposase
gene-M8001_RS24980	-0.108217	0.79919	0.943368	WP_010951895.1	IS66-like element ISPpu15 family transposase
gene-M8001_RS21105	-0.340332	0.485563	0.814947	WP_010951896.1	IS66 family insertion sequence element accessory protein TnpB
gene-M8001_RS03440	-0.0899418	0.759198	0.929608	WP_010951897.1	DUF4276 family protein
gene-M8001_RS03445	0.0926539	0.779713	0.936373	WP_010951898.1	ATP-binding protein
gene-M8001_RS03450	0.483926	0.165406	0.536384	WP_010951899.1	helix-turn-helix domain-containing protein
gene-M8001_RS03460	0.604582	0.176592	0.548698	WP_010951900.1	YitT family protein
gene-M8001_RS03465	-0.0864189	0.86376	0.966497	WP_010951901.1	hypothetical protein
gene-M8001_RS03475	0.0336646	0.959381	0.993485	WP_010951904.1	PAAR domain-containing protein
gene-M8001_RS03480	-0.323955	0.333674	0.708276	WP_010951905.1	hypothetical protein
gene-M8001_RS03485	-0.274387	0.455844	0.797391	WP_010951906.1	GFA family protein
gene-M8001_RS03490	-0.291531	0.377283	0.742891	WP_010951907.1	NUDIX domain-containing protein
gene-M8001_RS03500	0.307608	0.321408	0.697632	WP_010951909.1	GNAT family N-acetyltransferase
gene-M8001_RS03510	0.283167	0.609909	0.875854	WP_010951910.1	gluconate:H+ symporter
gene-M8001_RS03530	-0.185683	0.623196	0.880064	WP_010951914.1	amino acid ABC transporter permease
gene-M8001_RS03545	0.115105	0.775912	0.935165	WP_010951917.1	cystathionine gamma-synthase family protein
gene-M8001_RS03550	0.245711	0.552138	0.852584	WP_010951918.1	amino acid permease
gene-M8001_RS03555	0.0861782	0.771312	0.934023	WP_010951919.1	LysR substrate-binding domain-containing protein
gene-M8001_RS03560	0.311551	0.344377	0.71593	WP_010951920.1	threonine synthase
gene-M8001_RS03565	0.191547	0.634691	0.884798	WP_010951921.1	Lrp/AsnC family transcriptional regulator
gene-M8001_RS03570	0.603621	0.166759	0.53746	WP_010951922.1	homoserine dehydrogenase
gene-M8001_RS03575	0.724252	0.0312071	0.242503	WP_010951923.1	aldehyde dehydrogenase family protein
gene-M8001_RS03585	0.536657	0.140945	0.498622	WP_010951925.1	sigma-70 family RNA polymerase sigma factor
gene-M8001_RS03590	-0.0139229	0.969517	0.997019	WP_010951926.1	FecR family protein
gene-M8001_RS03595	0.313455	0.307326	0.682572	WP_010951927.1	TonB-dependent receptor
gene-M8001_RS03600	-0.600401	0.125153	0.471515	WP_010951928.1	bile acid:sodium symporter
gene-M8001_RS03610	-0.355805	0.293368	0.670629	WP_010951929.1	EAL domain-containing protein
gene-M8001_RS03620	0.159359	0.663524	0.897131	WP_010951931.1	energy-dependent translational throttle protein EttA
gene-M8001_RS03630	0.497523	0.182835	0.553063	WP_010951933.1	GreA/GreB family elongation factor
gene-M8001_RS03655	0.400829	0.195119	0.567981	WP_010951936.1	hypothetical protein
gene-M8001_RS03675	0.00398534	0.992255	1	WP_010951938.1	hypothetical protein
gene-M8001_RS03680	-0.0808928	0.827811	0.955286	WP_010951939.1	zinc ribbon domain-containing protein YjdM
gene-M8001_RS03685	-0.768627	0.0435015	0.288059	WP_010951940.1	polyprenyl synthetase family protein
gene-M8001_RS03710	0.197096	0.494022	0.820957	WP_010951941.1	CreA family protein
gene-M8001_RS03715	0.0715556	0.858934	0.965442	WP_010951942.1	Mks condensin complex protein MksF
gene-M8001_RS03735	-0.471451	0.096774	0.416006	WP_010951945.1	ribosomal protein S18-alanine N-acetyltransferase
gene-M8001_RS03745	0.309934	0.423674	0.774336	WP_010951946.1	LysR substrate-binding domain-containing protein
gene-M8001_RS03750	-0.000657381	1	1	WP_010951947.1	LysE family transporter
gene-M8001_RS03765	-0.0479572	0.866692	0.967746	WP_010951949.1	MFS transporter
gene-M8001_RS03775	0.287695	0.524533	0.834211	WP_010951950.1	MFS transporter
gene-M8001_RS03785	-0.144118	0.669258	0.899246	WP_010951952.1	sigma-70 family RNA polymerase sigma factor
gene-M8001_RS03790	0.335578	0.280963	0.658695	WP_010951953.1	DNA-3-methyladenine glycosylase
gene-M8001_RS03795	0.0548704	0.894215	0.976569	WP_010951954.1	bifunctional DNA-binding transcriptional regulator/O6-methylguanine-DNA methyltransferase Ada
gene-M8001_RS03805	0.114855	0.747778	0.925727	WP_010951956.1	aldehyde dehydrogenase family protein
gene-M8001_RS03810	0.719929	0.0933519	0.413317	WP_010951957.1	cytosine permease
gene-M8001_RS03820	1.11194	0.0012089	0.0274768	WP_010951959.1	hydrolase
gene-M8001_RS03825	1.00102	0.00547974	0.079647	WP_010951960.1	polyphosphate kinase 2
gene-M8001_RS03830	0.654967	0.0824914	0.390245	WP_010951961.1	monovalent cation:proton antiporter-2 (CPA2) family protein
gene-M8001_RS03835	0.171918	0.635162	0.884798	WP_010951962.1	AI-2E family transporter
gene-M8001_RS03840	-0.195512	0.650921	0.89077	WP_010951963.1	TolC family protein
gene-M8001_RS03845	-0.659337	0.156036	0.526302	WP_010951964.1	HlyD family secretion protein
gene-M8001_RS03850	-0.0141623	1	1	WP_010951965.1	DUF2955 domain-containing protein
gene-M8001_RS03855	0.618171	0.0761096	0.375369	WP_010951966.1	sulfate permease
gene-M8001_RS03885	-0.582823	0.09207	0.410484	WP_010951968.1	4-(cytidine 5'-diphospho)-2-C-methyl-D-erythritol kinase
gene-M8001_RS03890	-0.542658	0.0582661	0.334102	WP_010951969.1	lipoprotein insertase outer membrane protein LolB
gene-M8001_RS03895	-0.214402	0.496206	0.821708	WP_010951970.1	tetratricopeptide repeat protein
gene-M8001_RS03905	-0.140204	0.671987	0.89941	WP_010951971.1	phosphocholine cytidylyltransferase family protein
gene-M8001_RS03910	-0.878065	0.00989592	0.116562	WP_010951972.1	type 1 glutamine amidotransferase
gene-M8001_RS03915	-0.243388	0.462396	0.800259	WP_010951973.1	PEP-utilizing enzyme
gene-M8001_RS03920	-0.272468	0.367586	0.732645	WP_010951974.1	phosphoenolpyruvate synthase
gene-M8001_RS03925	-0.047769	0.908282	0.978419	WP_010951975.1	ATP-grasp domain-containing protein
gene-M8001_RS03935	-0.306353	0.293768	0.670838	WP_010951977.1	glutamyl-tRNA reductase
gene-M8001_RS03940	-0.426447	0.183788	0.554254	WP_010951978.1	peptide chain release factor 1
gene-M8001_RS03945	-0.246781	0.421821	0.774283	WP_010951979.1	peptide chain release factor N(5)-glutamine methyltransferase
gene-M8001_RS03950	-0.268483	0.364269	0.730202	WP_010951980.1	molybdopterin-synthase adenylyltransferase MoeB
gene-M8001_RS03955	-0.147828	0.624779	0.880869	WP_010951981.1	glutamate racemase
gene-M8001_RS03965	1.88975	4.95001e-06	0.00037984	WP_010951983.1	SDR family oxidoreductase
gene-M8001_RS03970	2.34864	5.46011e-09	7.49759e-07	WP_010951984.1	deoxyribodipyrimidine photo-lyase
gene-M8001_RS03975	3.28886	1.42766e-13	4.96634e-11	WP_010951985.1	MerR family transcriptional regulator
gene-M8001_RS03980	3.16991	1.67235e-09	2.64434e-07	WP_010951986.1	DUF523 and DUF1722 domain-containing protein
gene-M8001_RS03985	2.28003	3.48766e-08	3.714e-06	WP_010951987.1	NAD(P)/FAD-dependent oxidoreductase
gene-M8001_RS03990	2.1013	1.2324e-08	1.42904e-06	WP_010951988.1	TIGR01777 family oxidoreductase
gene-M8001_RS03995	1.2436	2.71073e-05	0.00137075	WP_010951989.1	ferrochelatase
gene-M8001_RS04010	-0.0809596	0.772422	0.93436	WP_010951990.1	hypoxanthine-guanine phosphoribosyltransferase
gene-M8001_RS04015	-0.180961	0.597421	0.871627	WP_010951991.1	WbuC family cupin fold metalloprotein
gene-M8001_RS04030	-0.686136	0.0577451	0.332944	WP_010951993.1	malate dehydrogenase (quinone)
gene-M8001_RS04040	0.114366	0.704403	0.909173	WP_010951995.1	YajG family lipoprotein
gene-M8001_RS04060	1.24974	0.00246953	0.0461864	WP_010951999.1	CPXCG motif-containing cysteine-rich protein
gene-M8001_RS04070	-0.0178387	0.960136	0.993485	WP_010952000.1	SOS response-associated peptidase
gene-M8001_RS04085	-0.644221	0.0391882	0.274476	WP_010952002.1	class I SAM-dependent methyltransferase
gene-M8001_RS04090	0.108012	0.721827	0.916962	WP_010952003.1	2-hydroxyacid dehydrogenase
gene-M8001_RS04095	0.996884	0.00749776	0.0978083	WP_010952004.1	fatty acid--CoA ligase
gene-M8001_RS04100	0.453551	0.211132	0.584444	WP_010952006.1	DUF1302 domain-containing protein
gene-M8001_RS04105	-0.203297	0.566483	0.859035	WP_010952007.1	DUF1329 domain-containing protein
gene-M8001_RS04110	0.868521	0.0469467	0.298378	WP_010952008.1	LuxR C-terminal-related transcriptional regulator
gene-M8001_RS04120	0.46166	0.173594	0.545342	WP_010952009.1	HAMP domain-containing histidine kinase
gene-M8001_RS04130	0.274806	0.403971	0.761447	WP_010952011.1	type II toxin-antitoxin system ChpB family toxin
gene-M8001_RS04135	0.469711	0.161978	0.532912	WP_010952012.1	MBL fold metallo-hydrolase
gene-M8001_RS04145	-0.0154873	0.955852	0.993485	WP_010952014.1	phosphate acetyltransferase
gene-M8001_RS04150	0.0998524	0.73577	0.921961	WP_010952015.1	DUF3565 domain-containing protein
gene-M8001_RS04165	0.421362	0.211516	0.584581	WP_010952016.1	glycosyltransferase family 1 protein
gene-M8001_RS04180	0.45421	0.562464	0.858311	WP_010952020.1	DUF1851 domain-containing protein
gene-M8001_RS04190	-0.157575	0.590023	0.866648	WP_010952022.1	sulfate transporter CysZ
gene-M8001_RS04200	-0.428975	0.179806	0.551081	WP_010952023.1	carboxylating nicotinate-nucleotide diphosphorylase
gene-M8001_RS04210	0.272371	0.379944	0.74504	WP_010952025.1	1%2C6-anhydro-N-acetylmuramyl-L-alanine amidase AmpD
gene-M8001_RS04215	0.219226	0.458862	0.799179	WP_010952026.1	regulatory signaling modulator protein AmpE
gene-M8001_RS04220	-0.0347399	0.931961	0.985866	WP_010952027.1	TatD family hydrolase
gene-M8001_RS04225	-0.100863	0.725142	0.917951	WP_010952028.1	catabolite repressor/activator
gene-M8001_RS04230	-0.113414	0.759631	0.929805	WP_010952029.1	phosphoenolpyruvate--protein phosphotransferase
gene-M8001_RS04235	-0.0444539	0.901518	0.977698	WP_010952030.1	1-phosphofructokinase
gene-M8001_RS04240	-0.108715	0.769706	0.933143	WP_010952031.1	PTS fructose-like transporter subunit IIB
gene-M8001_RS04255	-0.319361	0.290218	0.667305	WP_010952034.1	sensor domain-containing diguanylate cyclase
gene-M8001_RS04260	-0.259792	0.470058	0.805194	WP_010952035.1	OprD family porin
gene-M8001_RS04280	1.02913	0.0113428	0.126738	WP_010952038.1	chemotaxis protein
gene-M8001_RS04285	-0.514149	0.111165	0.445435	WP_010952039.1	HlyD family type I secretion periplasmic adaptor subunit
gene-M8001_RS04290	-0.516067	0.136969	0.490287	WP_010952040.1	type I secretion system permease/ATPase
gene-M8001_RS04295	-0.148301	0.719287	0.916094	WP_010952041.1	TolC family outer membrane protein
gene-M8001_RS04300	0.340688	0.497792	0.823029	WP_010952042.1	Ig-like domain-containing protein
gene-M8001_RS04305	-0.505107	0.138618	0.493727	WP_010952043.1	nitric oxide reductase transcriptional regulator NorR
gene-M8001_RS04310	0.612321	0.0373586	0.268879	WP_010952044.1	NO-inducible flavohemoprotein
gene-M8001_RS04325	0.643677	0.2053	0.578941	WP_010952047.1	cytochrome o ubiquinol oxidase subunit I
gene-M8001_RS04330	0.986325	0.0276414	0.223057	WP_010952048.1	cytochrome o ubiquinol oxidase subunit III
gene-M8001_RS04345	-0.78009	0.0621218	0.342694	WP_010952049.1	alanine transaminase
gene-M8001_RS04375	-0.162231	0.583261	0.864586	WP_010952052.1	tRNA 2-selenouridine(34) synthase MnmH
gene-M8001_RS04380	-0.139927	0.64787	0.889049	WP_010952053.1	selenide%2C water dikinase SelD
gene-M8001_RS04385	-0.0703171	0.799947	0.943368	WP_010952054.1	putative selenate ABC transporter substrate-binding protein
gene-M8001_RS04390	-0.0206033	0.947539	0.98985	WP_010952055.1	ATP-binding cassette domain-containing protein
gene-M8001_RS04400	-0.278493	0.352796	0.723052	WP_010952056.1	phosphonate ABC transporter%2C permease protein PhnE
gene-M8001_RS04415	0.287705	0.392337	0.752768	WP_010952058.1	GNAT family N-acetyltransferase
gene-M8001_RS04430	-0.495968	0.228408	0.602365	WP_010952060.1	tRNA preQ1(34) S-adenosylmethionine ribosyltransferase-isomerase QueA
gene-M8001_RS04445	-0.303157	0.486259	0.815108	WP_010952061.1	protein translocase subunit SecD
gene-M8001_RS04450	0.0282952	0.94728	0.98985	WP_010952062.1	protein translocase subunit SecF
gene-M8001_RS04455	0.422171	0.201253	0.574474	WP_010952063.1	glycine zipper 2TM domain-containing protein
gene-M8001_RS04470	-0.343527	0.241659	0.617574	WP_010952064.1	serine O-acetyltransferase
gene-M8001_RS04495	0.222051	0.510212	0.828931	WP_010952065.1	co-chaperone HscB
gene-M8001_RS04500	0.275888	0.42872	0.778179	WP_010952066.1	Fe-S protein assembly chaperone HscA
gene-M8001_RS04520	-0.318213	0.398636	0.758323	WP_010952067.1	23S rRNA (adenine(2503)-C(2))-methyltransferase RlmN
gene-M8001_RS04530	-0.286112	0.394165	0.753431	WP_010952069.1	DUF4115 domain-containing protein
gene-M8001_RS04535	-0.287324	0.400583	0.759146	WP_010952070.1	flavodoxin-dependent (E)-4-hydroxy-3-methylbut-2-enyl-diphosphate synthase
gene-M8001_RS04555	0.230838	0.566836	0.859035	WP_010952071.1	ribosome biogenesis GTPase Der
gene-M8001_RS04565	-0.155689	0.587884	0.866648	WP_010952072.1	amidohydrolase
gene-M8001_RS04585	-0.251794	0.477156	0.810071	WP_010952075.1	sel1 repeat family protein
gene-M8001_RS04605	0.513225	0.0994371	0.423205	WP_010952078.1	TonB-dependent siderophore receptor
gene-M8001_RS04610	0.496487	0.407939	0.765207	WP_010952079.1	ABC transporter ATP-binding protein
gene-M8001_RS04615	0.243226	0.705837	0.909173	WP_010952080.1	ABC transporter permease
gene-M8001_RS04635	0.641703	0.0377824	0.269329	WP_010952083.1	polyamine ABC transporter substrate-binding protein
gene-M8001_RS04640	0.548556	0.160333	0.530512	WP_010952084.1	cupin domain-containing protein
gene-M8001_RS04650	-0.0696843	0.847344	0.962639	WP_010952086.1	nuclear transport factor 2 family protein
gene-M8001_RS04655	-0.12265	0.666999	0.898651	WP_010952088.1	ABC transporter ATP-binding protein
gene-M8001_RS04660	-0.192187	0.511338	0.829653	WP_010952089.1	ABC transporter ATP-binding protein
gene-M8001_RS04680	-0.785787	0.0714348	0.36397	WP_010952091.1	OprD family porin
gene-M8001_RS04685	-0.392732	0.188817	0.561208	WP_010952092.1	ABC transporter substrate-binding protein
gene-M8001_RS04690	0.516951	0.15849	0.528884	WP_010952093.1	ABC transporter substrate-binding protein
gene-M8001_RS04715	-0.346538	0.491943	0.819591	WP_010952096.1	hypothetical protein
gene-M8001_RS04720	-0.26832	0.354496	0.723687	WP_010952097.1	YceI family protein
gene-M8001_RS04725	-0.273911	0.347252	0.71708	WP_010952098.1	phosphatidylserine/phosphatidylglycerophosphate/cardiolipin synthase family protein
gene-M8001_RS04735	0.233741	0.58906	0.866648	WP_010952100.1	nuclear transport factor 2 family protein
gene-M8001_RS04740	0.301962	0.327338	0.701645	WP_010952101.1	GNAT family N-acetyltransferase
gene-M8001_RS04745	0.257259	0.399415	0.7587	WP_010952102.1	carbon-nitrogen hydrolase family protein
gene-M8001_RS04755	0.0173911	0.94782	0.989937	WP_010952104.1	iron-sulfur-binding ferredoxin reductase
gene-M8001_RS04760	-0.558742	0.209363	0.583576	WP_010952105.1	phosphatase PAP2 family protein
gene-M8001_RS04775	-1.56779	3.62045e-05	0.00176556	WP_010952107.1	class I SAM-dependent methyltransferase
gene-M8001_RS04785	-0.420605	0.194331	0.567443	WP_010952109.1	hypothetical protein
gene-M8001_RS04790	-0.0493808	0.90867	0.978419	WP_010952110.1	multidrug efflux RND transporter permease subunit
gene-M8001_RS04800	-0.459414	0.161225	0.53245	WP_010952112.1	DUF1513 domain-containing protein
gene-M8001_RS04805	-0.605283	0.0504005	0.310829	WP_010952113.1	hypothetical protein
gene-M8001_RS04810	-0.796176	0.0146099	0.149479	WP_010952114.1	c-type cytochrome
gene-M8001_RS04825	-0.110387	0.760488	0.929841	WP_010952117.1	peptidase
gene-M8001_RS04845	0.59494	0.0733053	0.369572	WP_010952120.1	LysR family transcriptional regulator ArgP
gene-M8001_RS04850	-0.158144	0.607413	0.875046	WP_010952121.1	NAD(P)-dependent oxidoreductase
gene-M8001_RS04860	0.635197	0.111614	0.446034	WP_010952123.1	alkene reductase
gene-M8001_RS04870	0.246447	0.466531	0.804336	WP_010952124.1	ACP phosphodiesterase
gene-M8001_RS04875	0.278054	0.536335	0.841612	WP_010952125.1	1-acyl-sn-glycerol-3-phosphate acyltransferase
gene-M8001_RS04885	0.518833	0.118727	0.457548	WP_010952126.1	hypothetical protein
gene-M8001_RS04900	-0.417816	0.183189	0.553811	WP_010952128.1	calcium/sodium antiporter
gene-M8001_RS04905	-0.403495	0.168942	0.540158	WP_010952129.1	septal ring lytic transglycosylase RlpA family protein
gene-M8001_RS04910	-0.118257	0.744734	0.924658	WP_010952130.1	Asp-tRNA(Asn)/Glu-tRNA(Gln) amidotransferase subunit GatB
gene-M8001_RS04915	-0.270834	0.457234	0.797408	WP_010952131.1	Asp-tRNA(Asn)/Glu-tRNA(Gln) amidotransferase subunit GatA
gene-M8001_RS04940	-0.37763	0.238476	0.616024	WP_010952134.1	Maf-like protein
gene-M8001_RS04945	-0.10459	0.752941	0.92884	WP_010952135.1	ribonuclease G
gene-M8001_RS04950	0.22487	0.51487	0.830209	WP_010952136.1	TIGR02099 family protein
gene-M8001_RS04955	0.46141	0.110558	0.444798	WP_010952137.1	carbon-nitrogen hydrolase family protein
gene-M8001_RS04960	0.394325	0.237404	0.61482	WP_010952138.1	metalloprotease TldD
gene-M8001_RS04985	-0.139668	0.693989	0.906215	WP_010952141.1	hypothetical protein
gene-M8001_RS05000	-0.437123	0.145477	0.50775	WP_010952144.1	HPr family phosphocarrier protein
gene-M8001_RS05005	-0.0163848	0.964883	0.995405	WP_010952145.1	RNase adapter RapZ
gene-M8001_RS05025	-0.43304	0.210267	0.584444	WP_010952146.1	LPS export ABC transporter ATP-binding protein
gene-M8001_RS05035	-0.417118	0.163691	0.53431	WP_010952147.1	LPS export ABC transporter periplasmic protein LptC
gene-M8001_RS05040	-0.416665	0.174796	0.546924	WP_010952148.1	HAD family hydrolase
gene-M8001_RS05045	-0.428523	0.228769	0.602365	WP_010952149.1	KpsF/GutQ family sugar-phosphate isomerase
gene-M8001_RS05050	-0.718264	0.0607155	0.338383	WP_010952150.1	ATP-binding cassette domain-containing protein
gene-M8001_RS05060	-0.310819	0.317979	0.694522	WP_010952152.1	outer membrane lipid asymmetry maintenance protein MlaD
gene-M8001_RS05065	-0.0780455	0.818526	0.951639	WP_010952153.1	ABC transporter substrate-binding protein
gene-M8001_RS05070	0.0157912	0.95565	0.993485	WP_010952154.1	STAS domain-containing protein
gene-M8001_RS05085	-0.429238	0.239482	0.6174	WP_010952155.1	ATP phosphoribosyltransferase
gene-M8001_RS05090	0.0856713	0.818757	0.951639	WP_010952156.1	histidinol dehydrogenase
gene-M8001_RS05095	0.396408	0.270811	0.649165	WP_010952157.1	histidinol-phosphate transaminase
gene-M8001_RS05105	0.19981	0.636424	0.885563	WP_010952159.1	FadR family transcriptional regulator
gene-M8001_RS05115	0.0907073	0.778465	0.935952	WP_010952161.1	nuclear transport factor 2 family protein
gene-M8001_RS05120	0.0401435	0.878521	0.968811	WP_010952162.1	GIY-YIG nuclease family protein
gene-M8001_RS05125	-0.282445	0.324269	0.69974	WP_010952163.1	nucleoid-associated protein YejK
gene-M8001_RS05135	-0.306011	0.428477	0.778179	WP_010952165.1	23S rRNA (adenine(1618)-N(6))-methyltransferase RlmF
gene-M8001_RS05140	-0.33401	0.364671	0.730461	WP_010952166.1	valine--tRNA ligase
gene-M8001_RS05145	0.065102	0.807723	0.945821	WP_010952167.1	hypothetical protein
gene-M8001_RS05150	-0.330603	0.297506	0.671739	WP_010952168.1	DNA polymerase III subunit chi
gene-M8001_RS05155	0.0614592	0.8559	0.964552	WP_010952169.1	leucyl aminopeptidase
gene-M8001_RS05165	-0.315806	0.337752	0.711835	WP_010952171.1	LPS export ABC transporter permease LptG
gene-M8001_RS05180	0.868272	0.00606969	0.085831	WP_010952173.1	glycine cleavage system aminomethyltransferase GcvT
gene-M8001_RS05185	1.05606	0.00275206	0.0495181	WP_010952174.1	L-serine ammonia-lyase
gene-M8001_RS05195	1.69972	0.00132135	0.029084	WP_010952175.1	glycine cleavage system protein GcvH
gene-M8001_RS05205	0.885929	0.0556648	0.325992	WP_010952177.1	DNA-binding domain-containing protein
gene-M8001_RS05210	1.38094	0.00118785	0.0274768	WP_010952178.1	DUF692 domain-containing protein
gene-M8001_RS05215	1.31323	0.0264346	0.215862	WP_010952179.1	DUF2282 domain-containing protein
gene-M8001_RS05220	0.374224	0.270921	0.649165	WP_010952180.1	sigma-70 family RNA polymerase sigma factor
gene-M8001_RS05225	0.187466	0.650365	0.89071	WP_010952181.1	DUF1109 domain-containing protein
gene-M8001_RS05230	-0.0424736	0.976159	0.999694	WP_010952182.1	sodium/glutamate symporter
gene-M8001_RS05245	-0.0915827	0.813927	0.948359	WP_010952184.1	carbamate kinase
gene-M8001_RS05250	-0.0340491	0.932731	0.985866	WP_010952185.1	ornithine carbamoyltransferase
gene-M8001_RS05255	-0.0475387	0.904789	0.977698	WP_010952186.1	arginine deiminase
gene-M8001_RS05260	-0.114294	0.730923	0.919979	WP_010952187.1	arginine-ornithine antiporter
gene-M8001_RS05270	-0.0974918	0.861301	0.966382	WP_010952188.1	YbaN family protein
gene-M8001_RS05275	0.179251	0.534073	0.839142	WP_010952189.1	biliverdin-producing heme oxygenase
gene-M8001_RS05295	0.0801543	0.867784	0.967746	WP_010952192.1	type I glyceraldehyde-3-phosphate dehydrogenase
gene-M8001_RS05305	-0.240652	0.587944	0.866648	WP_010952193.1	glucokinase
gene-M8001_RS05310	-0.282679	0.515181	0.830209	WP_010952194.1	two-component system response regulator GltR
gene-M8001_RS05315	-0.595637	0.193946	0.567271	WP_010952195.1	ATP-binding protein
gene-M8001_RS05320	0.0162747	0.966579	0.996443	WP_010952196.1	AGE family epimerase/isomerase
gene-M8001_RS05325	1.4561	0.00502003	0.0748414	WP_010952197.1	ABC transporter substrate-binding protein
gene-M8001_RS05335	0.92201	0.133106	0.483904	WP_010952198.1	carbohydrate ABC transporter permease
gene-M8001_RS05345	1.0896	0.0917786	0.410484	WP_010952199.1	carbohydrate porin
gene-M8001_RS05360	-1.30094	0.00394469	0.0625273	WP_010952201.1	glucose-6-phosphate dehydrogenase
gene-M8001_RS05375	0.976373	0.00915634	0.111275	WP_010952204.1	2-isopropylmalate synthase
gene-M8001_RS05380	-0.306588	0.283696	0.659975	WP_010952205.1	M23 family metallopeptidase
gene-M8001_RS05385	-0.160204	0.578716	0.862661	WP_010952206.1	exodeoxyribonuclease VII large subunit
gene-M8001_RS05390	0.472789	0.181659	0.552651	WP_010952207.1	LysR substrate-binding domain-containing protein
gene-M8001_RS05395	0.624901	0.12514	0.471515	WP_010952208.1	sulfite exporter TauE/SafE family protein
gene-M8001_RS05410	-0.319788	0.428546	0.778179	WP_010952209.1	glutamine-hydrolyzing GMP synthase
gene-M8001_RS05435	-0.185528	0.648197	0.889049	WP_010952214.1	phosphoribosylformylglycinamidine synthase
gene-M8001_RS05440	-0.0209302	0.954441	0.993395	WP_010952215.1	YqfO family protein
gene-M8001_RS05445	0.476734	0.366732	0.732061	WP_010952216.1	twin-arginine translocase subunit TatC
gene-M8001_RS05460	0.830925	0.0851856	0.394409	WP_010952217.1	type II secretion system minor pseudopilin GspK
gene-M8001_RS05465	-0.0833991	0.864275	0.966497	WP_010952218.1	PhoX family phosphatase
gene-M8001_RS05490	0.768897	0.428908	0.778179	WP_010952223.1	type II secretion system inner membrane protein GspF
gene-M8001_RS05500	0.780575	0.222997	0.596412	WP_010952225.1	type II secretion system minor pseudopilin GspH
gene-M8001_RS05520	0.692113	0.428071	0.778179	WP_010952229.1	type II secretion system protein GspM
gene-M8001_RS05530	0.909719	0.00759229	0.0985487	WP_010952231.1	siderophore-interacting protein
gene-M8001_RS05540	0.990833	0.00708922	0.0936495	WP_010952232.1	transglycosylase domain-containing protein
gene-M8001_RS05550	0.169139	0.567824	0.859035	WP_010952233.1	FMN-binding glutamate synthase family protein
gene-M8001_RS05555	0.608473	0.124558	0.47055	WP_010952234.1	DEAD/DEAH box helicase
gene-M8001_RS05560	-0.45413	0.186025	0.55786	WP_010952235.1	NUDIX domain-containing protein
gene-M8001_RS05575	-1.32187	0.000493045	0.0138318	WP_010952237.1	GlpM family protein
gene-M8001_RS05580	-1.43301	0.000294139	0.00897553	WP_010952238.1	sigma-54 dependent transcriptional regulator
gene-M8001_RS05595	-2.77008	7.54845e-12	1.87561e-09	WP_010952241.1	ABC transporter permease subunit
gene-M8001_RS05600	-2.65596	6.79718e-09	8.7066e-07	WP_010952242.1	amino acid ABC transporter permease
gene-M8001_RS05610	0.320122	0.334019	0.708276	WP_010952244.1	leucine-rich repeat domain-containing protein
gene-M8001_RS05620	-0.564518	0.0592628	0.337223	WP_010952246.1	DNA-binding transcriptional repressor GlpR
gene-M8001_RS05625	-0.487509	0.22394	0.597096	WP_010952247.1	glycerol kinase GlpK
gene-M8001_RS05640	-0.633752	0.0666816	0.355235	WP_010952248.1	ABC transporter ATP-binding protein
gene-M8001_RS05645	-0.691908	0.0304745	0.239482	WP_010952249.1	ornithine carbamoyltransferase
gene-M8001_RS05650	2.51841	3.68518e-07	3.4338e-05	WP_010952250.1	molybdopterin-dependent oxidoreductase
gene-M8001_RS05655	0.231598	0.553248	0.852584	WP_010952251.1	Grx4 family monothiol glutaredoxin
gene-M8001_RS05680	0.0138554	0.971209	0.997594	WP_010952253.1	dihydroorotase
gene-M8001_RS05695	1.08716	0.0191242	0.176089	WP_010952255.1	hypothetical protein
gene-M8001_RS05705	-0.0311455	0.907789	0.978419	WP_010952256.1	hypothetical protein
gene-M8001_RS05710	-0.304281	0.353834	0.723687	WP_010952257.1	endonuclease III
gene-M8001_RS05720	-0.100497	0.745888	0.925	WP_010952259.1	RnfABCDGE type electron transport complex subunit G
gene-M8001_RS05725	0.0177239	0.949685	0.990893	WP_010952260.1	RnfABCDGE type electron transport complex subunit D
gene-M8001_RS05730	-0.178032	0.525813	0.834211	WP_010952261.1	electron transporter RnfA
gene-M8001_RS05735	-0.33562	0.343167	0.715686	WP_010952262.1	methionine--tRNA ligase
gene-M8001_RS05740	-0.0629753	0.836598	0.95879	WP_010952263.1	iron-sulfur cluster carrier protein ApbC
gene-M8001_RS05760	0.762048	0.0422603	0.285203	WP_010952265.1	ligase-associated DNA damage response endonuclease PdeM
gene-M8001_RS05765	0.483603	0.169972	0.542033	WP_010952266.1	ligase-associated DNA damage response DEXH box helicase
gene-M8001_RS05770	0.467624	0.133356	0.483904	WP_010952267.1	M14 family metallopeptidase
gene-M8001_RS05775	0.0636714	0.894596	0.976569	WP_010952268.1	ATP-dependent DNA ligase
gene-M8001_RS05780	-0.0239614	0.883373	0.971407	WP_010952269.1	ligase-associated DNA damage response exonuclease
gene-M8001_RS05785	-0.148116	0.604326	0.874192	WP_010952271.1	penicillin acylase family protein
gene-M8001_RS05790	0.222221	0.468788	0.805047	WP_010952272.1	PLP-dependent aminotransferase family protein
gene-M8001_RS05800	0.182	0.615339	0.876081	WP_010952274.1	alanyl-tRNA editing protein
gene-M8001_RS05805	0.103856	0.778775	0.936108	WP_010952275.1	MFS transporter
gene-M8001_RS05810	0.164527	0.652645	0.891248	WP_010952276.1	pyridoxal-phosphate dependent enzyme
gene-M8001_RS05815	0.297067	0.336788	0.711194	WP_010952277.1	SEC-C metal-binding domain-containing protein
gene-M8001_RS05835	0.398684	0.316149	0.691822	WP_010952279.1	recombinase family protein
gene-M8001_RS05845	1.86808	0.00132656	0.029084	WP_010952280.1	hypothetical protein
gene-M8001_RS05855	-0.100266	0.739139	0.922465	WP_010952281.1	recombinase family protein
gene-M8001_RS05865	0.428457	0.195903	0.568648	WP_010952283.1	DUF6231 family protein
gene-M8001_RS05870	0.70773	0.0957397	0.414946	WP_010952284.1	OmpA family protein
gene-M8001_RS05885	-0.0943326	0.806019	0.945337	WP_010952286.1	CopD family protein
gene-M8001_RS05900	-0.796662	0.0288341	0.229354	WP_010952288.1	EstA family serine hydrolase
gene-M8001_RS05910	-0.362909	0.228635	0.602365	WP_010952290.1	pyridoxamine 5'-phosphate oxidase
gene-M8001_RS05925	0.181512	0.600146	0.872072	WP_010952292.1	Na+/H+ antiporter NhaA
gene-M8001_RS05935	-0.203569	0.563557	0.858831	WP_010952294.1	NAD(P)/FAD-dependent oxidoreductase
gene-M8001_RS05945	-0.263696	0.429077	0.778215	WP_010952296.1	hypothetical protein
gene-M8001_RS05955	-0.0787052	0.819515	0.952177	WP_010952297.1	high-affinity branched-chain amino acid ABC transporter ATP-binding protein LivG
gene-M8001_RS05960	-0.134611	0.716073	0.914457	WP_010952298.1	high-affinity branched-chain amino acid ABC transporter permease LivM
gene-M8001_RS05970	-0.302506	0.444511	0.788215	WP_010952299.1	branched-chain amino acid ABC transporter substrate-binding protein
gene-M8001_RS05980	-0.495582	0.0854394	0.394883	WP_010952301.1	NAD(P)-dependent oxidoreductase
gene-M8001_RS05985	0.891967	0.0298727	0.236162	WP_010952302.1	EAL domain-containing protein
gene-M8001_RS05990	-0.136458	0.707648	0.909979	WP_010952303.1	RNA polymerase-associated protein RapA
gene-M8001_RS05995	0.392683	0.246115	0.623911	WP_010952304.1	hypothetical protein
gene-M8001_RS06000	0.97919	0.0183849	0.172361	WP_010952305.1	hypothetical protein
gene-M8001_RS06010	0.263774	0.349666	0.720315	WP_010952307.1	FUSC family protein
gene-M8001_RS06015	-0.299098	0.653064	0.891264	WP_010952308.1	DUF1656 domain-containing protein
gene-M8001_RS06020	0.0808822	0.791782	0.940906	WP_010952309.1	HlyD family secretion protein
gene-M8001_RS06030	1.76701	2.28642e-05	0.0012174	WP_010952311.1	EAL domain-containing protein
gene-M8001_RS06035	2.46689	3.15876e-11	7.16627e-09	WP_010952312.1	diguanylate cyclase
gene-M8001_RS06040	0.199399	0.60516	0.874333	WP_010952313.1	formate/nitrite transporter family protein
gene-M8001_RS06070	0.247065	0.519778	0.833221	WP_010952314.1	hypothetical protein
gene-M8001_RS06075	0.414481	0.215083	0.58764	WP_010952315.1	asparaginase
gene-M8001_RS06085	0.268754	0.424002	0.774394	WP_010952317.1	glutathione S-transferase
gene-M8001_RS06090	0.467099	0.192579	0.56422	WP_010952318.1	pyridoxamine 5'-phosphate oxidase family protein
gene-M8001_RS06095	0.221752	0.492413	0.820024	WP_010952319.1	LysR family transcriptional regulator
gene-M8001_RS06100	-0.0965545	0.81799	0.951506	WP_010952320.1	aldose 1-epimerase
gene-M8001_RS06105	-0.00859839	0.970332	0.997084	WP_010952321.1	DMT family transporter
gene-M8001_RS06110	-0.303451	0.297411	0.671739	WP_010952322.1	TRAP transporter large permease
gene-M8001_RS06120	-0.147885	0.634002	0.884315	WP_010952323.1	TRAP transporter substrate-binding protein
gene-M8001_RS06125	0.120358	0.695405	0.907155	WP_010952324.1	SMP-30/gluconolactonase/LRE family protein
gene-M8001_RS06130	0.117618	0.762287	0.929841	WP_010952325.1	NAD(P)-dependent oxidoreductase
gene-M8001_RS06135	0.597265	0.231011	0.604522	WP_010952327.1	OprD family porin
gene-M8001_RS06140	2.04249	0.00950847	0.113277	WP_010952328.1	hypothetical protein
gene-M8001_RS06155	-0.152144	0.719606	0.916187	WP_010952332.1	ribonucleoside-diphosphate reductase subunit alpha
gene-M8001_RS06160	0.225672	0.479346	0.810497	WP_010952334.1	response regulator transcription factor
gene-M8001_RS06165	0.289307	0.343716	0.71593	WP_010952335.1	ATP-binding protein
gene-M8001_RS06170	0.155924	0.6161	0.876473	WP_010952336.1	4'-phosphopantetheinyl transferase superfamily protein
gene-M8001_RS06180	-0.55921	0.160238	0.530512	WP_010952338.1	outer membrane beta-barrel protein
gene-M8001_RS06185	0.0508216	0.855553	0.964552	WP_010952339.1	response regulator
gene-M8001_RS06190	0.138176	0.684676	0.904673	WP_010952340.1	ATP-binding protein
gene-M8001_RS06195	1.46952	0.000141304	0.00501583	WP_010952341.1	dicarboxylate/amino acid:cation symporter
gene-M8001_RS06205	0.10365	0.744242	0.924658	WP_010952343.1	DUF1456 family protein
gene-M8001_RS06210	-0.0971832	0.742667	0.924549	WP_010952344.1	rRNA pseudouridine synthase
gene-M8001_RS06235	0.222485	0.569189	0.859047	WP_010952348.1	DUF5666 domain-containing protein
gene-M8001_RS06260	-0.038805	0.900479	0.977698	WP_010952353.1	potassium transporter Kup
gene-M8001_RS06265	0.16173	0.587967	0.866648	WP_010952354.1	virulence factor family protein
gene-M8001_RS06270	0.501996	0.110866	0.445176	WP_010952355.1	bifunctional lysylphosphatidylglycerol flippase/synthetase MprF
gene-M8001_RS06300	-0.659778	0.0964763	0.416006	WP_010952358.1	proline--tRNA ligase
gene-M8001_RS06305	-0.681204	0.178674	0.550331	WP_010952359.1	OprD family porin
gene-M8001_RS06310	-0.440925	0.184712	0.555521	WP_010952360.1	HIT domain-containing protein
gene-M8001_RS06315	-0.464614	0.154153	0.52304	WP_010952361.1	SlyX family protein
gene-M8001_RS06325	0.228736	0.435711	0.781813	WP_010952363.1	DNA starvation/stationary phase protection protein
gene-M8001_RS06335	-0.689741	0.0236786	0.202218	WP_010952365.1	zinc ribbon domain-containing protein
gene-M8001_RS06350	-0.62595	0.0463055	0.296678	WP_010952366.1	crossover junction endodeoxyribonuclease RuvC
gene-M8001_RS06370	-0.17324	0.587193	0.866648	WP_010952367.1	protein TolQ
gene-M8001_RS06380	-0.287523	0.332893	0.708126	WP_010952368.1	cell envelope integrity protein TolA
gene-M8001_RS06405	0.126977	0.670566	0.89941	WP_010952369.1	7-cyano-7-deazaguanine synthase QueC
gene-M8001_RS06415	0.103621	0.718455	0.915482	WP_010952370.1	cation transporter
gene-M8001_RS06420	0.303167	0.507025	0.826756	WP_010952371.1	methyl-accepting chemotaxis protein McpU
gene-M8001_RS06425	0.223337	0.567933	0.859035	WP_010952372.1	APC family permease
gene-M8001_RS06430	0.0287292	0.926371	0.9846	WP_010952373.1	YdgA family protein
gene-M8001_RS06440	-0.0160393	0.962387	0.995191	WP_010952374.1	M48 family metalloprotease
gene-M8001_RS06455	-0.280653	0.341689	0.714888	WP_010952375.1	peroxiredoxin
gene-M8001_RS06470	-0.434802	0.241211	0.617556	WP_010952376.1	outer membrane protein assembly factor BamC
gene-M8001_RS06475	-0.366008	0.281665	0.659368	WP_010952377.1	MBL fold metallo-hydrolase
gene-M8001_RS06490	0.592689	0.524388	0.834211	WP_010952378.1	putative addiction module antidote protein
gene-M8001_RS06510	-0.237219	0.616118	0.876473	WP_010952383.1	hypothetical protein
gene-M8001_RS06535	0.277573	0.426368	0.776041	WP_010952387.1	malate dehydrogenase (quinone)
gene-M8001_RS06550	0.395315	0.220823	0.594061	WP_010952388.1	xenobiotic reductase XenA
gene-M8001_RS06555	0.18099	0.675449	0.901322	WP_010952389.1	FAD-binding oxidoreductase
gene-M8001_RS06560	0.495322	0.172875	0.545342	WP_010952390.1	aldehyde dehydrogenase (NADP(+))
gene-M8001_RS06565	0.946822	0.0219142	0.192831	WP_010952391.1	dihydrodipicolinate synthase family protein
gene-M8001_RS06570	-0.111471	0.646095	0.888492	WP_010952392.1	4-hydroxyproline epimerase
gene-M8001_RS06575	0.260628	0.699076	0.908498	WP_010952393.1	APC family permease
gene-M8001_RS06585	-0.340081	0.225857	0.599451	WP_010952394.1	D-glycerate dehydrogenase
gene-M8001_RS06595	0.603404	0.0959889	0.414971	WP_010952395.1	efflux transporter outer membrane subunit
gene-M8001_RS06610	0.0936309	0.599482	0.872072	WP_010952396.1	HlyD family secretion protein
gene-M8001_RS06615	-0.49386	0.129001	0.47671	WP_010952397.1	type II toxin-antitoxin system YhaV family toxin
gene-M8001_RS06625	0.505802	0.386599	0.749143	WP_010952399.1	universal stress protein
gene-M8001_RS06630	0.108812	0.710342	0.912048	WP_010952400.1	LysR family transcriptional regulator
gene-M8001_RS06635	0.427931	0.235143	0.611348	WP_010952401.1	MFS transporter
gene-M8001_RS06645	0.358343	0.301093	0.676392	WP_010952403.1	efflux transporter outer membrane subunit
gene-M8001_RS06650	0.160007	0.658517	0.894363	WP_010952404.1	SDR family oxidoreductase
gene-M8001_RS06655	0.378554	0.278039	0.657138	WP_010952405.1	hypothetical protein
gene-M8001_RS06680	-0.694087	0.179857	0.551081	WP_010952409.1	MBOAT family protein
gene-M8001_RS06690	0.408288	0.323537	0.69919	WP_010952411.1	alginate O-acetyltransferase
gene-M8001_RS06700	1.04698	0.0285524	0.227808	WP_010952413.1	alginate export family protein
gene-M8001_RS06710	0.377696	0.626093	0.88153	WP_010952415.1	PilZ domain-containing protein
gene-M8001_RS06720	0.253987	1	1	WP_010952417.1	UDP-glucose/GDP-mannose dehydrogenase family protein
gene-M8001_RS06725	-0.623903	0.0465088	0.296678	WP_010952418.1	peroxide stress protein YaaA
gene-M8001_RS06750	0.507809	0.101811	0.429119	WP_010952421.1	molybdopterin synthase catalytic subunit MoaE
gene-M8001_RS06755	-0.479562	0.151821	0.518369	WP_010952422.1	ATP-dependent RNA helicase RhlB
gene-M8001_RS06760	-0.583286	0.0455559	0.293888	WP_010952423.1	alpha/beta fold hydrolase
gene-M8001_RS06765	-0.576557	0.133271	0.483904	WP_010952424.1	amino acid ABC transporter substrate-binding protein
gene-M8001_RS06770	-0.703712	0.0603435	0.33766	WP_010952425.1	amino acid ABC transporter permease
gene-M8001_RS06775	-0.472502	0.20701	0.579849	WP_010952426.1	amino acid ABC transporter permease
gene-M8001_RS06790	-0.0729286	0.798758	0.943368	WP_010952428.1	Nif3-like dinuclear metal center hexameric protein
gene-M8001_RS06805	1.10797	0.011491	0.127847	WP_010952429.1	bacteriocin immunity protein
gene-M8001_RS06820	1.10627	0.00549622	0.0796647	WP_010952431.1	methionine gamma-lyase
gene-M8001_RS06825	-0.045563	0.857947	0.965029	WP_010952432.1	DUF1043 family protein
gene-M8001_RS06830	-0.176497	0.565542	0.858917	WP_010952433.1	alpha/beta fold hydrolase
gene-M8001_RS06835	-0.19753	0.502378	0.824602	WP_010952434.1	tryptophan--tRNA ligase
gene-M8001_RS06840	-1.15915	0.0018456	0.0370398	WP_010952435.1	cell division protein ZapE
gene-M8001_RS06845	-0.423455	0.153368	0.521351	WP_010952436.1	GlxA family transcriptional regulator
gene-M8001_RS06850	0.437814	0.194862	0.567721	WP_010952437.1	NADP(H)-dependent aldo-keto reductase
gene-M8001_RS06870	-0.29431	0.389273	0.750562	WP_010952438.1	cytochrome bc complex cytochrome b subunit
gene-M8001_RS06875	-0.241758	0.463605	0.80161	WP_010952439.1	cytochrome c1
gene-M8001_RS06880	-0.227321	0.477993	0.81032	WP_010952440.1	glutathione S-transferase N-terminal domain-containing protein
gene-M8001_RS06890	-0.186562	0.560872	0.857418	WP_010952442.1	BON domain-containing protein
gene-M8001_RS06905	-0.311608	0.419292	0.772551	WP_010952444.1	penicillin-binding protein activator
gene-M8001_RS06930	-0.382982	0.196171	0.568963	WP_010952448.1	cell division protein FtsL
gene-M8001_RS06945	-0.400127	0.246948	0.62438	WP_010952451.1	UDP-N-acetylmuramoyl-tripeptide--D-alanyl-D-alanine ligase
gene-M8001_RS06965	-0.397222	0.286846	0.663165	WP_010952454.1	undecaprenyldiphospho-muramoylpentapeptide beta-N-acetylglucosaminyltransferase
gene-M8001_RS06970	-0.250364	0.553191	0.852584	WP_010952455.1	UDP-N-acetylmuramate--L-alanine ligase
gene-M8001_RS06975	-0.125947	0.754033	0.92884	WP_010952456.1	D-alanine--D-alanine ligase
gene-M8001_RS06980	-0.360923	0.312769	0.689091	WP_010952457.1	cell division protein FtsQ/DivIB
gene-M8001_RS07005	-0.130854	0.712534	0.913065	WP_010952460.1	preprotein translocase subunit SecA
gene-M8001_RS07010	-0.439339	0.237835	0.61482	WP_010952461.1	bifunctional glutamate N-acetyltransferase/amino-acid acetyltransferase ArgJ
gene-M8001_RS07015	-0.27357	0.41172	0.767596	WP_010952462.1	glutathione S-transferase family protein
gene-M8001_RS07020	-0.0971362	0.766818	0.931508	WP_010952463.1	Nudix family hydrolase
gene-M8001_RS07025	0.0124616	0.981192	1	WP_010952464.1	cob(I)yrinic acid a%2Cc-diamide adenosyltransferase
gene-M8001_RS07030	0.0325623	0.909083	0.978419	WP_010952465.1	ATP-binding protein
gene-M8001_RS07035	0.229359	0.43591	0.781813	WP_010952466.1	putative 2-dehydropantoate 2-reductase
gene-M8001_RS07050	0.269538	0.451098	0.794687	WP_010952468.1	MFS transporter
gene-M8001_RS07055	-0.464125	0.150204	0.514956	WP_010952469.1	AmpG family muropeptide MFS transporter
gene-M8001_RS07060	0.409471	0.263602	0.643346	WP_010952470.1	MGMT family protein
gene-M8001_RS07075	0.956294	0.0108768	0.12419	WP_010952473.1	membrane protein FxsA
gene-M8001_RS07085	0.879758	0.0172473	0.165424	WP_010952474.1	chaperonin GroEL
gene-M8001_RS07105	0.357146	0.273788	0.652611	WP_010952477.1	exodeoxyribonuclease I
gene-M8001_RS07110	-0.813901	0.0528265	0.314667	WP_010952478.1	DNA binding protein
gene-M8001_RS07125	0.418712	0.317432	0.694199	WP_010952479.1	flippase-like domain-containing protein
gene-M8001_RS07135	0.49773	0.18269	0.553063	WP_010952481.1	glycosyltransferase family 1 protein
gene-M8001_RS07140	0.963007	0.00642724	0.0882561	WP_010952482.1	methyl-accepting chemotaxis protein
gene-M8001_RS07145	0.757587	0.0450329	0.292995	WP_010952483.1	DUF853 family protein
gene-M8001_RS07165	0.386779	0.216732	0.589629	WP_010952484.1	MFS transporter
gene-M8001_RS07180	0.532867	0.127084	0.47458	WP_010952486.1	MFS family transporter
gene-M8001_RS07185	0.326517	0.338729	0.711835	WP_010952487.1	3-carboxy-cis%2Ccis-muconate cycloisomerase
gene-M8001_RS07190	0.391175	0.252558	0.629345	WP_010952488.1	3-oxoadipate enol-lactonase
gene-M8001_RS07195	0.468366	0.202536	0.57593	WP_010952489.1	4-carboxymuconolactone decarboxylase
gene-M8001_RS07200	2.23146	1.56447e-05	0.000877784	WP_010952490.1	DUF962 domain-containing protein
gene-M8001_RS07205	0.248407	0.43167	0.7807	WP_010952491.1	OprD family porin
gene-M8001_RS07210	0.210281	0.500932	0.824233	WP_010952492.1	adeC/adeK/oprM family multidrug efflux complex outer membrane factor
gene-M8001_RS07215	0.0950555	0.787749	0.93945	WP_010952493.1	multidrug efflux RND transporter permease subunit TtgB
gene-M8001_RS07220	0.199347	0.575263	0.860922	WP_010952494.1	toluene efflux RND transporter periplasmic adaptor subunit TtgA
gene-M8001_RS07225	0.624526	0.153103	0.520788	WP_010952495.1	efflux transport transcriptional regulator TtgR
gene-M8001_RS07230	-0.300651	0.288384	0.665246	WP_010952496.1	MFS transporter
gene-M8001_RS07240	-0.0338326	0.912664	0.979087	WP_010952499.1	LysR family transcriptional regulator
gene-M8001_RS07245	0.889291	0.00402922	0.0633267	WP_010952500.1	NAD(P)-dependent oxidoreductase
gene-M8001_RS07250	0.869343	0.0214427	0.190609	WP_010952501.1	LysR substrate-binding domain-containing protein
gene-M8001_RS07255	0.909535	0.0138332	0.142845	WP_010952502.1	5-guanidino-2-oxopentanoate decarboxylase
gene-M8001_RS07260	0.122231	0.661859	0.896442	WP_010952503.1	AraC family transcriptional regulator
gene-M8001_RS07265	0.455639	0.152255	0.51926	WP_010952504.1	antibiotic biosynthesis monooxygenase
gene-M8001_RS07270	0.0286088	0.904485	0.977698	WP_010952505.1	hypothetical protein
gene-M8001_RS07275	0.218942	0.454095	0.796063	WP_010952506.1	flavin reductase family protein
gene-M8001_RS07285	0.220098	0.545511	0.846662	WP_010952508.1	MFS transporter
gene-M8001_RS07290	0.0273605	0.932775	0.985866	WP_010952509.1	sigma-54 dependent transcriptional regulator
gene-M8001_RS07295	-0.271658	0.364168	0.730202	WP_010952510.1	ATP-binding protein
gene-M8001_RS07300	-0.364999	0.25085	0.627893	WP_010952511.1	beta-glucosidase BglX
gene-M8001_RS07305	-0.0600688	0.875587	0.968811	WP_010952512.1	TPM domain-containing protein
gene-M8001_RS07315	-0.288862	0.387542	0.749295	WP_010952514.1	DUF4917 family protein
gene-M8001_RS07320	-0.0924174	0.791571	0.940899	WP_010952515.1	SulP family inorganic anion transporter
gene-M8001_RS07330	0.292064	0.332474	0.707813	WP_010952516.1	(R)-3-hydroxydecanoyl-ACP:CoA transacylase
gene-M8001_RS07345	-0.106381	0.712329	0.913065	WP_010952518.1	diguanylate cyclase
gene-M8001_RS07355	1.15385	0.00483844	0.0731082	WP_010952519.1	enoyl-CoA hydratase/isomerase family protein
gene-M8001_RS07360	-0.354889	0.278513	0.657138	WP_010952520.1	uracil-DNA glycosylase
gene-M8001_RS07365	0.367909	0.365668	0.730858	WP_010952521.1	bifunctional metallophosphatase/5'-nucleotidase
gene-M8001_RS07370	0.000882892	1	1	WP_010952522.1	AbrB family transcriptional regulator
gene-M8001_RS07375	0.335117	0.282871	0.659457	WP_010952523.1	tripartite tricarboxylate transporter permease
gene-M8001_RS07385	-0.108414	0.75082	0.927285	WP_010952525.1	tripartite tricarboxylate transporter substrate binding protein
gene-M8001_RS07390	1.23353	0.0104522	0.120396	WP_010952526.1	OprD family porin
gene-M8001_RS07395	0.238278	0.439439	0.784602	WP_010952527.1	response regulator
gene-M8001_RS07410	-0.321002	0.326034	0.700415	WP_010952530.1	folate-binding protein YgfZ
gene-M8001_RS07420	-0.60487	0.0567182	0.329572	WP_010952531.1	hypothetical protein
gene-M8001_RS07425	-0.425755	0.158592	0.528884	WP_010952532.1	L-aspartate oxidase
gene-M8001_RS07440	-0.307148	0.42654	0.776041	WP_010952533.1	MucB/RseB C-terminal domain-containing protein
gene-M8001_RS07450	-0.629812	0.102019	0.429649	WP_010952535.1	translation elongation factor 4
gene-M8001_RS07470	0.181926	0.668672	0.899028	WP_010952537.1	DNA repair protein RecO
gene-M8001_RS07475	-0.0188896	0.950452	0.991297	WP_010952538.1	pyridoxine 5'-phosphate synthase
gene-M8001_RS07480	0.0425763	0.936003	0.987393	WP_010952539.1	heavy metal sensor histidine kinase
gene-M8001_RS07495	-0.677704	0.0366325	0.26734	WP_010952540.1	tRNA 5-methoxyuridine(34)/uridine 5-oxyacetic acid(34) synthase CmoB
gene-M8001_RS07500	-0.610287	0.0884995	0.400512	WP_010952541.1	carboxy-S-adenosyl-L-methionine synthase CmoA
gene-M8001_RS07510	0.592936	0.0803639	0.388277	WP_010952543.1	endopeptidase La
gene-M8001_RS07515	0.0585244	0.865622	0.967405	WP_010952544.1	glucose/quinate/shikimate family membrane-bound PQQ-dependent dehydrogenase
gene-M8001_RS07520	0.698554	0.0807475	0.389118	WP_010952545.1	carbohydrate porin
gene-M8001_RS07525	-0.530932	0.197123	0.569505	WP_010952546.1	TonB-dependent receptor
gene-M8001_RS07535	0.0828632	0.754547	0.92884	WP_010952548.1	Pr6Pr family membrane protein
gene-M8001_RS07540	0.202776	0.502991	0.824732	WP_010952549.1	hemagglutinin repeat-containing protein
gene-M8001_RS07550	-0.243884	0.399226	0.7587	WP_010952551.1	L%2CD-transpeptidase family protein
gene-M8001_RS07555	0.0621386	0.85336	0.963377	WP_010952552.1	NUDIX hydrolase
gene-M8001_RS07560	0.0858917	0.778293	0.935952	WP_010952553.1	CoA pyrophosphatase
gene-M8001_RS07565	0.195667	0.528216	0.835408	WP_010952554.1	gamma carbonic anhydrase family protein
gene-M8001_RS07575	-0.135316	0.713416	0.913255	WP_010952556.1	VUT family protein
gene-M8001_RS07580	0.0338833	0.924977	0.984202	WP_010952557.1	formate-dependent phosphoribosylglycinamide formyltransferase
gene-M8001_RS07585	-0.445811	0.121405	0.463418	WP_010952558.1	MHS family MFS transporter
gene-M8001_RS07590	-0.44155	0.151719	0.518369	WP_010952559.1	CNNM domain-containing protein
gene-M8001_RS07625	-0.22989	0.591082	0.867342	WP_010952562.1	acyl-CoA thioesterase
gene-M8001_RS07630	0.793522	0.0371952	0.268444	WP_010952563.1	sodium:proton antiporter
gene-M8001_RS07650	0.0119745	0.976891	0.999694	WP_010952565.1	threonine synthase
gene-M8001_RS07665	-0.549652	0.062455	0.342694	WP_010952568.1	TIGR02285 family protein
gene-M8001_RS07670	-0.131775	0.66487	0.897849	WP_010952569.1	CoA transferase
gene-M8001_RS07680	-0.492398	0.194543	0.567517	WP_010952570.1	single-stranded-DNA-specific exonuclease RecJ
gene-M8001_RS07685	1.18733	0.00520951	0.0765725	WP_010952571.1	NADH:flavin oxidoreductase/NADH oxidase
gene-M8001_RS07690	-0.176534	0.55436	0.853043	WP_010952572.1	type II toxin-antitoxin system HicB family antitoxin
gene-M8001_RS07695	-0.154093	0.622289	0.87947	WP_010952573.1	type II toxin-antitoxin system HicA family toxin
gene-M8001_RS07700	-0.385482	0.211912	0.585057	WP_010952574.1	gamma-aminobutyraldehyde dehydrogenase
gene-M8001_RS07705	-0.418849	0.197836	0.570391	WP_010952575.1	ABC transporter permease
gene-M8001_RS07710	-0.309372	0.443836	0.788215	WP_010952576.1	ABC transporter permease
gene-M8001_RS07715	0.29557	0.365709	0.730858	WP_010952577.1	ABC transporter ATP-binding protein
gene-M8001_RS07725	0.528663	0.193219	0.56578	WP_010952580.1	tellurite resistance TerB family protein
gene-M8001_RS07730	0.111647	0.732372	0.920847	WP_010952581.1	methyl-accepting chemotaxis protein
gene-M8001_RS07735	-0.305922	0.304441	0.680039	WP_010952582.1	chemotaxis protein CheW
gene-M8001_RS07740	-0.723365	0.0133063	0.140267	WP_010952583.1	tetratricopeptide repeat protein
gene-M8001_RS07750	-0.46993	0.17352	0.545342	WP_010952585.1	hybrid sensor histidine kinase/response regulator
gene-M8001_RS07755	-0.0753761	0.814119	0.948359	WP_010952586.1	Wsp signal transduction system protein-glutamate methylesterase WspF
gene-M8001_RS07770	-0.186751	0.679873	0.904072	WP_010952588.1	lysine--tRNA ligase
gene-M8001_RS07780	0.325451	0.267666	0.647294	WP_010952590.1	lipoprotein
gene-M8001_RS07790	-0.186782	0.524601	0.834211	WP_010952592.1	alpha/beta hydrolase
gene-M8001_RS07795	-0.267148	0.444119	0.788215	WP_010952593.1	hypothetical protein
gene-M8001_RS07800	-0.316054	0.445013	0.788215	WP_010952594.1	OmpA family protein
gene-M8001_RS07815	0.239901	0.478035	0.81032	WP_010952597.1	phosphoenolpyruvate carboxylase
gene-M8001_RS07825	-1.09443	0.000841629	0.0211136	WP_010952598.1	tRNA (adenosine(37)-N6)-threonylcarbamoyltransferase complex dimerization subunit type 1 TsaB
gene-M8001_RS07835	-0.0408932	0.906928	0.978419	WP_010952600.1	DUF72 domain-containing protein
gene-M8001_RS07840	0.350927	0.237631	0.61482	WP_010952601.1	isocitrate lyase/phosphoenolpyruvate mutase family protein
gene-M8001_RS07845	0.179791	0.565407	0.858917	WP_010952602.1	extensin family protein
gene-M8001_RS07850	0.833577	0.0334989	0.251507	WP_010952603.1	hypothetical protein
gene-M8001_RS07855	0.136962	0.641054	0.887038	WP_010952604.1	class I SAM-dependent methyltransferase
gene-M8001_RS07860	0.11317	0.786021	0.938976	WP_010952605.1	RHS repeat-associated core domain-containing protein
gene-M8001_RS07865	-0.0542088	0.851964	0.963377	WP_010952606.1	TetR/AcrR family transcriptional regulator
gene-M8001_RS07870	-0.396689	0.250886	0.627893	WP_010952607.1	efflux RND transporter periplasmic adaptor subunit
gene-M8001_RS07875	-1.01182	0.00624952	0.0874492	WP_010952608.1	efflux RND transporter permease subunit
gene-M8001_RS07880	0.128162	0.695943	0.907471	WP_010952609.1	DUF4197 domain-containing protein
gene-M8001_RS07890	-0.0375722	0.89657	0.977698	WP_010952610.1	glycerol-3-phosphate 1-O-acyltransferase PlsB
gene-M8001_RS07900	-0.424109	0.180376	0.5517	WP_010952612.1	hypothetical protein
gene-M8001_RS07915	-0.139332	0.648471	0.889049	WP_010952613.1	glycosyltransferase
gene-M8001_RS07930	0.235739	0.418857	0.772551	WP_010952615.1	cysteine desulfurase
gene-M8001_RS08265	-0.157985	0.658266	0.894363	WP_010952672.1	succinyldiaminopimelate transaminase
gene-M8001_RS08270	-0.309536	0.373116	0.738028	WP_010952673.1	[protein-PII] uridylyltransferase
gene-M8001_RS08285	-0.196864	0.647067	0.888525	WP_010952674.1	translation elongation factor Ts
gene-M8001_RS08300	-0.123922	0.764786	0.930656	WP_010952675.1	polyprenyl diphosphate synthase
gene-M8001_RS08305	-0.0899751	0.81339	0.948228	WP_010952676.1	phosphatidate cytidylyltransferase
gene-M8001_RS08320	-0.463447	0.21409	0.587402	WP_010952679.1	outer membrane protein assembly factor BamA
gene-M8001_RS08340	-0.456572	0.256953	0.634839	WP_010952681.1	acyl-ACP--UDP-N-acetylglucosamine O-acyltransferase
gene-M8001_RS08345	-0.397223	0.366513	0.732061	WP_010952682.1	lipid-A-disaccharide synthase
gene-M8001_RS08355	-0.179832	0.630618	0.883211	WP_010952683.1	DNA polymerase III subunit alpha
gene-M8001_RS08365	-0.132296	0.661314	0.896062	WP_010952684.1	tRNA lysidine(34) synthetase TilS
gene-M8001_RS08375	-0.25685	0.485324	0.814947	WP_010952685.1	3-deoxy-8-phosphooctulonate synthase
gene-M8001_RS08390	-0.13079	0.655165	0.892598	WP_010952686.1	2-C-methyl-D-erythritol 4-phosphate cytidylyltransferase
gene-M8001_RS08395	0.17358	0.563936	0.858917	WP_010952687.1	LysR substrate-binding domain-containing protein
gene-M8001_RS08415	-0.496404	0.111058	0.445427	WP_010952689.1	tRNA pseudouridine(13) synthase TruD
gene-M8001_RS08420	-0.458866	0.137935	0.492301	WP_010952690.1	5'/3'-nucleotidase SurE
gene-M8001_RS08450	-0.40328	0.271305	0.649391	WP_010952693.1	DNA mismatch repair protein MutS
gene-M8001_RS08460	0.308257	0.279705	0.657138	WP_010952695.1	CinA family protein
gene-M8001_RS08470	0.628579	0.0863478	0.395917	WP_010952696.1	recombination regulator RecX
gene-M8001_RS08475	1.01206	0.00119668	0.0274768	WP_010952697.1	LOG family protein
gene-M8001_RS08495	-0.0645076	0.831177	0.956767	WP_010952699.1	response regulator transcription factor
gene-M8001_RS08500	-0.700021	0.0446779	0.291776	WP_010952700.1	diacylglycerol kinase
gene-M8001_RS08515	0.238248	0.423393	0.774336	WP_010952701.1	SprT family zinc-dependent metalloprotease
gene-M8001_RS08525	-0.880895	0.0154419	0.155534	WP_010952702.1	tRNA 2-thiocytidine(32) synthetase TtcA
gene-M8001_RS08530	-0.703105	0.0355256	0.261456	WP_010952703.1	DNA-3-methyladenine glycosylase I
gene-M8001_RS08535	-0.122511	0.679317	0.903744	WP_010952704.1	DUF2069 domain-containing protein
gene-M8001_RS08545	-0.467712	0.118573	0.457292	WP_010952705.1	arsenate reductase (glutaredoxin)
gene-M8001_RS08550	0.221021	0.450717	0.794687	WP_010952706.1	peroxiredoxin family protein
gene-M8001_RS08560	-0.538359	0.081985	0.390065	WP_010952708.1	hypothetical protein
gene-M8001_RS08570	-0.0277294	0.92844	0.984875	WP_010952710.1	response regulator
gene-M8001_RS08580	0.378215	0.327422	0.701645	WP_010952712.1	sensor histidine kinase
gene-M8001_RS08590	-0.0658966	0.8613	0.966382	WP_010952713.1	cysteine synthase CysM
gene-M8001_RS08595	-0.194066	0.589974	0.866648	WP_010952714.1	23S rRNA (uracil(1939)-C(5))-methyltransferase RlmD
gene-M8001_RS08600	0.159804	0.642819	0.887996	WP_010952715.1	GTP diphosphokinase
gene-M8001_RS08615	0.365124	0.382605	0.74745	WP_010952716.1	hypothetical protein
gene-M8001_RS08625	0.252114	0.558409	0.855499	WP_010952718.1	GMC family oxidoreductase
gene-M8001_RS08635	-0.588842	0.0596628	0.337549	WP_010952720.1	DUF3108 domain-containing protein
gene-M8001_RS08640	-0.732098	0.0502834	0.310829	WP_010952721.1	phosphoribosylglycinamide formyltransferase
gene-M8001_RS08650	0.122632	0.678958	0.903744	WP_010952722.1	DUF2066 domain-containing protein
gene-M8001_RS08655	0.206315	0.494347	0.820975	WP_010952723.1	AI-2E family transporter
gene-M8001_RS08670	-0.030897	0.959471	0.993485	WP_010952725.1	C40 family peptidase
gene-M8001_RS08680	0.860664	0.0118023	0.129925	WP_010952727.1	cobyrinate a%2Cc-diamide synthase
gene-M8001_RS08685	0.729983	0.0369397	0.268083	WP_010952728.1	5%2C6-dimethylbenzimidazole synthase
gene-M8001_RS08695	0.736977	0.0309346	0.241281	WP_010952730.1	threonine-phosphate decarboxylase CobD
gene-M8001_RS08700	0.684985	0.0502591	0.310829	WP_010952731.1	cobyric acid synthase
gene-M8001_RS08710	0.841982	0.0343036	0.255693	WP_010952732.1	nicotinate-nucleotide--dimethylbenzimidazole phosphoribosyltransferase
gene-M8001_RS08715	0.89804	0.0212603	0.189635	WP_010952733.1	alpha-ribazole phosphatase family protein
gene-M8001_RS08730	0.018426	1	1	WP_010952736.1	MarR family winged helix-turn-helix transcriptional regulator
gene-M8001_RS08740	0.271559	0.621977	0.87947	WP_010952738.1	hypothetical protein
gene-M8001_RS08755	0.0951734	0.794118	0.941855	WP_010952741.1	LysR family transcriptional regulator
gene-M8001_RS08760	-0.172129	0.657358	0.894363	WP_010952742.1	outer membrane protein transport protein
gene-M8001_RS08770	0.257969	0.59648	0.870735	WP_010952743.1	hypothetical protein
gene-M8001_RS08785	-0.206524	0.539874	0.843807	WP_010952747.1	hybrid sensor histidine kinase/response regulator
gene-M8001_RS08790	-0.0642392	0.842597	0.960738	WP_010952748.1	MFS transporter
gene-M8001_RS08800	0.310461	0.364402	0.730202	WP_010952750.1	MFS transporter
gene-M8001_RS08815	-0.22088	0.452631	0.795399	WP_010952753.1	quaternary ammonium compound efflux SMR transporter SugE
gene-M8001_RS08850	-0.999611	0.0367646	0.267556	WP_010952756.1	nitrite reductase large subunit NirB
gene-M8001_RS08855	-0.407629	0.338931	0.711974	WP_010952757.1	nitrite reductase small subunit NirD
gene-M8001_RS08860	0.993378	0.0172741	0.165424	WP_010952758.1	2-hydroxyacid dehydrogenase
gene-M8001_RS08865	0.415299	0.387857	0.749295	WP_010952759.1	SDR family oxidoreductase
gene-M8001_RS08870	1.01386	0.0211253	0.189441	WP_010952760.1	fumarylacetoacetate hydrolase family protein
gene-M8001_RS08875	1.11376	0.019984	0.182301	WP_010952761.1	MFS transporter
gene-M8001_RS08880	0.282288	0.469768	0.805194	WP_010952762.1	AraC family transcriptional regulator
gene-M8001_RS08890	0.184251	0.537713	0.842579	WP_010952764.1	pca operon transcription factor PcaQ
gene-M8001_RS08895	-0.26747	0.382899	0.747456	WP_010952765.1	FKBP-type peptidyl-prolyl cis-trans isomerase
gene-M8001_RS08900	0.0179365	0.960166	0.993485	WP_010952766.1	DUF1232 domain-containing protein
gene-M8001_RS08925	0.153	0.606235	0.874333	WP_010952769.1	NAD(P)H-quinone oxidoreductase
gene-M8001_RS08930	-0.129635	0.750607	0.927241	WP_010952770.1	HAD-IB family hydrolase
gene-M8001_RS08935	-0.668913	0.0393457	0.274834	WP_010952771.1	ABC transporter ATP-binding protein
gene-M8001_RS08945	-0.372034	0.29263	0.669417	WP_010952772.1	ABC transporter permease subunit
gene-M8001_RS08955	0.109361	0.773143	0.934722	WP_010952774.1	extracellular solute-binding protein
gene-M8001_RS08975	-0.337928	0.277246	0.657015	WP_010952777.1	M18 family aminopeptidase
gene-M8001_RS09000	-0.632029	0.0848045	0.393342	WP_010952779.1	lipid A biosynthesis lauroyl acyltransferase
gene-M8001_RS09005	-0.500323	0.125302	0.471735	WP_010952780.1	patatin-like phospholipase family protein
[truncated: 3,219 more rows]
