# Supplementary material for: Pseudomonas putida as saviour for troubled Synechococcus elongatus in a synthetic co-culture – Interaction studies based on a multi-OMICs approach
Source: Research Square preprint supplement (doi:10.21203/rs.3.rs-3234880/v1), 2023-08-08
Supplement: Supplementary file 5 [file coculture_vs_selongatus_foldchanges_27032023.xlsx]

## Sheet: coculture_VS_selongatus foldcha
gene_id	log2_foldChange	p_value	adj_p_value	gene_name	gene_product
gene-H6G84_RS00005	0.660138	0.000833041	0.00160209	WP_011243845.1	zinc ABC transporter substrate-binding protein
gene-H6G84_RS00010	0.65317	0.000240777	0.000501587	WP_011378521.1	metal ABC transporter ATP-binding protein
gene-H6G84_RS00015	0.225571	0.206092	0.25361	WP_011243847.1	metal ABC transporter permease
gene-H6G84_RS00020	-0.512299	0.00332548	0.00580389	WP_011243848.1	DUF1825 family protein
gene-H6G84_RS00025	0.35273	0.0181564	0.0278426	WP_011243849.1	penicillin-binding protein
gene-H6G84_RS00030	-0.189329	0.225292	0.274219	WP_199290622.1	tyrosine--tRNA ligase
gene-H6G84_RS00035	0.51071	0.00106389	0.00202096	WP_011243851.1	orotidine-5'-phosphate decarboxylase
gene-H6G84_RS00040	-0.011273	0.941843	0.951073	WP_011243852.1	hypothetical protein
gene-H6G84_RS00045	0.591307	6.53627e-05	0.000147769	WP_199290621.1	thiamine-phosphate kinase
gene-H6G84_RS00050	0.291486	0.0707726	0.0969324	WP_011378520.1	photosystem II protein PsbQ
gene-H6G84_RS00055	0.46508	0.00409584	0.00707463	WP_011243855.1	elongation factor P
gene-H6G84_RS00060	0.614271	4.94038e-05	0.00011351	WP_199290620.1	acetyl-CoA carboxylase biotin carboxyl carrier protein
gene-H6G84_RS00065	0.175023	0.237581	0.287349	WP_011243857.1	SMC family ATPase
gene-H6G84_RS00070	0.125148	0.425095	0.479911	WP_011378519.1	methionine gamma-lyase family protein
gene-H6G84_RS00075	1.16726	5.46094e-10	2.22712e-09	WP_011243859.1	fatty acid desaturase
gene-H6G84_RS00080	-0.410462	0.0449538	0.0638215	WP_199290619.1	GNAT family N-acetyltransferase
gene-H6G84_RS00085	0.740619	1.02459e-06	2.8863e-06	WP_011243861.1	50S ribosomal protein L9
gene-H6G84_RS00090	-0.311329	0.117065	0.151287	WP_011243862.1	cysteine desulfurase
gene-H6G84_RS00095	-0.372585	0.0214677	0.0323464	WP_011378517.1	bidirectional hydrogenase complex protein HoxU
gene-H6G84_RS00100	-0.69605	7.60341e-05	0.000170172	WP_011243864.1	oxidoreductase
gene-H6G84_RS00105	-0.614362	6.23273e-05	0.000141504	WP_011378516.1	Ni/Fe hydrogenase subunit alpha
gene-H6G84_RS00110	-1.01664	1.0182e-08	3.64674e-08	WP_011243866.1	hydrogenase maturation protease
gene-H6G84_RS00115	-0.599578	0.000411025	0.000829168	WP_199290553.1	hydrogenase maturation nickel metallochaperone HypA
gene-H6G84_RS00120	0.0847733	0.592707	0.641043	WP_011243868.1	hydrogenase nickel incorporation protein HypB
gene-H6G84_RS00125	-1.44336	4.79e-21	5.0721e-20	WP_011243869.1	carbamoyltransferase HypF
gene-H6G84_RS00130	-0.34978	0.0853427	0.114891	WP_011243870.1	HypC/HybG/HupF family hydrogenase formation chaperone
gene-H6G84_RS00135	0.449338	0.0135063	0.0212094	WP_011243871.1	ATP-binding protein
gene-H6G84_RS00140	-1.07777	0.0596	0.0827297	WP_011378515.1	hypothetical protein
gene-H6G84_RS00145	-0.095901	0.512851	0.566101	WP_011243872.1	3-isopropylmalate dehydratase small subunit
gene-H6G84_RS00150	-1.42804	5.59572e-17	4.43519e-16	WP_011243873.1	hypothetical protein
gene-H6G84_RS00155	0.634985	0.000123856	0.00026889	WP_011243874.1	GDSL-type esterase/lipase family protein
gene-H6G84_RS00160	-2.12868	2.72522e-30	1e-28	WP_011243875.1	pyridoxal phosphate-dependent aminotransferase
gene-H6G84_RS00165	-0.0436461	1	1	WP_011243876.1	glyoxalase/bleomycin resistance/dioxygenase family protein
gene-H6G84_RS00170	0.376523	0.00872049	0.0142452	WP_011243877.1	uracil-DNA glycosylase
gene-H6G84_RS00175	-0.0650434	0.695224	0.733848	WP_011243878.1	c-type cytochrome
gene-H6G84_RS00180	-1.93199	1.26219e-06	3.50767e-06	NA	NA
gene-H6G84_RS00185	-2.53441	6.31316e-21	6.63253e-20	NA	NA
gene-H6G84_RS00190	-1.49474	1.65989e-22	1.9941e-21	WP_039755904.1	50S ribosomal protein L19
gene-H6G84_RS00195	-0.93125	0.000119179	0.000259157	WP_011243880.1	cupredoxin domain-containing protein
gene-H6G84_RS00200	-1.32	3.92684e-19	3.65278e-18	WP_011378513.1	thylakoid membrane photosystem I accumulation factor
gene-H6G84_RS00205	-0.0242902	0.883409	0.899526	WP_011243882.1	ATP-dependent Clp protease proteolytic subunit
gene-H6G84_RS00210	0.24378	0.140308	0.179677	WP_011243883.1	ATP-dependent Clp protease proteolytic subunit
gene-H6G84_RS00215	0.0760036	0.635068	0.681084	WP_011378512.1	DnaJ domain-containing protein
gene-H6G84_RS00220	-1.73579	1.68145e-21	1.85132e-20	WP_155814000.1	diguanylate cyclase
gene-H6G84_RS00225	-1.05831	5.41937e-10	2.21995e-09	WP_011378510.1	sensor domain-containing diguanylate cyclase
gene-H6G84_RS00230	-0.968392	9.69457e-10	3.8591e-09	WP_011243887.1	hypothetical protein
gene-H6G84_RS00235	0.880864	1.69813e-08	5.97021e-08	WP_011378509.1	alpha/beta fold hydrolase
gene-H6G84_RS00240	1.62026	1.49687e-18	1.32785e-17	WP_011243889.1	translation elongation factor Ts
gene-H6G84_RS00245	1.33026	2.89384e-14	1.8156e-13	WP_011378508.1	30S ribosomal protein S2
gene-H6G84_RS00250	-0.285082	0.097817	0.129281	WP_011378507.1	DUF4278 domain-containing protein
gene-H6G84_RS00255	-0.139105	0.496662	0.550887	WP_011378506.1	lecithin retinol acyltransferase family protein
gene-H6G84_RS00260	-0.159016	0.268356	0.320234	WP_011243892.1	alpha/beta hydrolase
gene-H6G84_RS00265	0.275204	0.0924101	0.12274	WP_011243893.1	ATP-dependent protease ATP-binding subunit ClpX
gene-H6G84_RS00270	0.649617	4.8618e-05	0.0001118	WP_011243894.1	ATP-dependent Clp endopeptidase proteolytic subunit ClpP
gene-H6G84_RS00275	-0.810273	2.94947e-05	7.01121e-05	WP_011378504.1	trigger factor
gene-H6G84_RS00280	-1.71128	3.31679e-14	2.06165e-13	WP_011378503.1	hypothetical protein
gene-H6G84_RS00285	-0.136522	0.396681	0.451627	WP_011378502.1	NAD(P)H-dependent glycerol-3-phosphate dehydrogenase
gene-H6G84_RS00290	-0.108711	0.429387	0.483331	WP_011378501.1	PhoH family protein
gene-H6G84_RS00295	-0.475085	0.00169527	0.00310858	WP_011378500.1	LOG family protein
gene-H6G84_RS00300	-0.792967	5.9254e-07	1.7311e-06	WP_011378499.1	EAL domain-containing protein
gene-H6G84_RS00305	0.105993	0.498962	0.552591	WP_011378498.1	glycogen synthase GlgA
gene-H6G84_RS00310	0.152876	0.365952	0.420586	WP_011243900.1	hypothetical protein
gene-H6G84_RS00315	-0.603344	0.00400285	0.00692295	WP_011378497.1	hypothetical protein
gene-H6G84_RS00320	-2.60019	1.02092e-08	3.65158e-08	NA	NA
gene-H6G84_RS00325	0.453998	0.00343289	0.00598743	WP_011243901.1	ATP-dependent helicase
gene-H6G84_RS00330	-2.07833	1.95004e-45	1.13569e-43	WP_011243902.1	ornithine carbamoyltransferase
gene-H6G84_RS00335	-1.00185	1.82414e-10	7.88206e-10	WP_242021676.1	BtpA/SgcQ family protein
gene-H6G84_RS00340	0.712608	4.80702e-05	0.000110731	WP_011378495.1	30S ribosomal protein S12 methylthiotransferase RimO
gene-H6G84_RS00345	1.27873	3.6169e-17	2.92739e-16	WP_011378494.1	SRPBCC family protein
gene-H6G84_RS00350	-1.33092	2.46053e-14	1.55466e-13	WP_011243906.1	translation initiation factor IF-1
gene-H6G84_RS00355	1.65863	2.8e-27	4.94e-26	WP_011243907.1	HAD family hydrolase
gene-H6G84_RS00360	2.41078	2.13943e-59	3.18418e-57	WP_011243908.1	NAD(P)/FAD-dependent oxidoreductase
gene-H6G84_RS00370	-0.220419	0.217189	0.265564	WP_011243910.1	phosphoadenylyl-sulfate reductase
gene-H6G84_RS00375	-1.70087	3.05852e-10	1.28631e-09	WP_011243911.1	class I SAM-dependent methyltransferase
gene-H6G84_RS00380	-0.72349	0.00289468	0.00511196	WP_011243912.1	hypothetical protein
gene-H6G84_RS00385	-4.58527	3.40911e-68	9.133e-66	WP_011378491.1	protochlorophyllide reductase
gene-H6G84_RS00390	-3.04561	6.8817e-20	6.77797e-19	WP_199290617.1	hypothetical protein
gene-H6G84_RS00395	-0.454585	0.020363	0.0308381	WP_011243915.1	3-deoxy-7-phosphoheptulonate synthase
gene-H6G84_RS00400	-1.35663	1.45135e-19	1.38863e-18	WP_011243916.1	hypothetical protein
gene-H6G84_RS00405	-1.03374	6.56878e-07	1.90041e-06	WP_011243917.1	SPFH domain-containing protein
gene-H6G84_RS00410	-0.747135	0.00010371	0.000227924	WP_011243918.1	SPFH domain-containing protein
gene-H6G84_RS00415	-0.574495	0.000979247	0.00186719	WP_011243919.1	nucleoside-diphosphate kinase
gene-H6G84_RS00420	-0.28364	0.0840907	0.113319	WP_011243920.1	ABC transporter substrate-binding protein
gene-H6G84_RS00425	-0.0462401	0.757279	0.791862	WP_011243921.1	branched-chain amino acid ABC transporter permease
gene-H6G84_RS00430	0.486222	0.00115047	0.00217509	WP_011243922.1	branched-chain amino acid ABC transporter permease
gene-H6G84_RS00435	0.138582	0.453089	0.506816	WP_011243923.1	ABC transporter ATP-binding protein
gene-H6G84_RS00440	0.290329	0.0955093	0.126543	WP_011243924.1	ABC transporter ATP-binding protein
gene-H6G84_RS00445	0.112158	0.476217	0.530252	WP_011243925.1	DNA topoisomerase (ATP-hydrolyzing) subunit B
gene-H6G84_RS00450	-2.0477	1.43833e-20	1.48204e-19	WP_011378489.1	tRNA (adenosine(37)-N6)-dimethylallyltransferase MiaA
gene-H6G84_RS00460	0.414815	0.0045488	0.00779171	WP_011243928.1	hypothetical protein
gene-H6G84_RS00465	0.0410475	0.789736	0.821632	WP_011243929.1	NAD(P)H-quinone oxidoreductase subunit O
gene-H6G84_RS00470	-1.3471	4.27465e-15	2.88458e-14	WP_011378487.1	hypothetical protein
gene-H6G84_RS00475	-2.04296	6.07645e-20	6.00694e-19	WP_011378486.1	hypothetical protein
gene-H6G84_RS00480	-1.35792	5.4361e-14	3.30234e-13	WP_011243931.1	hypothetical protein
gene-H6G84_RS00485	1.1757	3.45262e-13	1.95965e-12	WP_011243932.1	hypothetical protein
gene-H6G84_RS00490	-0.0836407	0.651695	0.696406	WP_231621377.1	2OG-Fe(II) oxygenase
gene-H6G84_RS00500	-0.210509	0.223169	0.272254	WP_011243936.1	photosystem II reaction center protein Psb28
gene-H6G84_RS00505	-0.735904	1.80184e-05	4.4164e-05	WP_234910003.1	TIGR01777 family oxidoreductase
gene-H6G84_RS00510	-1.52084	1.801e-25	2.7882e-24	WP_039755541.1	hypothetical protein
gene-H6G84_RS00520	0.402272	0.00795754	0.0130547	WP_011243940.1	hypothetical protein
gene-H6G84_RS00525	-0.521911	0.0017144	0.00314151	WP_011243941.1	SpoIIE family protein phosphatase
gene-H6G84_RS00530	0.157013	0.368051	0.422817	WP_011243942.1	signal recognition particle-docking protein FtsY
gene-H6G84_RS00535	0.0701756	0.70472	0.742654	WP_011243943.1	transcription antitermination factor NusB
gene-H6G84_RS00540	0.936447	7.80991e-10	3.13215e-09	WP_011378480.1	DUF502 domain-containing protein
gene-H6G84_RS00545	-0.267514	0.144773	0.184689	WP_011243945.1	HpsJ family protein
gene-H6G84_RS00550	0.0545568	0.80653	0.836556	WP_011378479.1	molecular chaperone DnaK
gene-H6G84_RS00555	-0.245403	0.102905	0.135205	WP_011243947.1	shikimate dehydrogenase
gene-H6G84_RS00560	0.398791	0.0750754	0.102303	WP_199290614.1	response regulator transcription factor
gene-H6G84_RS00565	-0.0746915	0.636309	0.682141	WP_011378477.1	hypothetical protein
gene-H6G84_RS00570	-0.176124	0.282677	0.334843	WP_011243950.1	N-acetylmannosamine-6-phosphate 2-epimerase
gene-H6G84_RS00575	0.986058	2.35905e-09	9.06729e-09	WP_011378476.1	methionine adenosyltransferase
gene-H6G84_RS00585	-1.29757	9.7245e-15	6.38528e-14	WP_011378474.1	agmatine deiminase family protein
gene-H6G84_RS00590	0.165786	0.27878	0.330758	WP_231621397.1	DNA (cytosine-5-)-methyltransferase
gene-H6G84_RS00595	-1.09241	1.52302e-13	8.94774e-13	WP_011243955.1	hypothetical protein
gene-H6G84_RS00600	-2.13306	1.48639e-17	1.23283e-16	NA	NA
gene-H6G84_RS00605	-1.13904	5.25887e-11	2.40829e-10	WP_011378473.1	competence protein ComEC family protein
gene-H6G84_RS00610	-0.110948	0.457355	0.510522	WP_234910002.1	glycine--tRNA ligase subunit alpha
gene-H6G84_RS00615	-0.163147	0.314882	0.36805	WP_011243958.1	DUF4335 domain-containing protein
gene-H6G84_RS00620	-0.920269	6.08569e-11	2.77271e-10	WP_234701761.1	DUF3038 domain-containing protein
gene-H6G84_RS00625	0.0165679	0.917162	0.928866	WP_011378471.1	adenine phosphoribosyltransferase
gene-H6G84_RS00630	-0.0647876	0.63813	0.68382	WP_199290551.1	type IV pilus assembly protein PilM
gene-H6G84_RS00635	-0.630259	3.57889e-05	8.37367e-05	WP_242016327.1	PilN domain-containing protein
gene-H6G84_RS00640	-0.615585	0.000100548	0.000221286	WP_011378469.1	hypothetical protein
gene-H6G84_RS00645	-0.758792	2.95641e-06	7.94406e-06	WP_011378468.1	AMIN domain-containing protein
gene-H6G84_RS00650	-1.89451	9.08447e-22	1.03124e-20	WP_011378467.1	peroxiredoxin
gene-H6G84_RS00655	-0.556709	0.000653301	0.00127845	WP_234910000.1	GTPase HflX
gene-H6G84_RS00660	-0.0409025	0.817466	0.844904	WP_011243969.1	hypothetical protein
gene-H6G84_RS00665	0.558888	0.00090409	0.00173128	WP_011243970.1	type I methionyl aminopeptidase
gene-H6G84_RS00670	-0.415779	0.0185057	0.0283134	WP_011243971.1	PstS family phosphate ABC transporter substrate-binding protein
gene-H6G84_RS00675	0.293274	0.071278	0.0975062	WP_011243972.1	PstS family phosphate ABC transporter substrate-binding protein
gene-H6G84_RS00680	0.353712	0.01017	0.0164306	WP_011378465.1	phosphate ABC transporter permease subunit PstC
gene-H6G84_RS00685	0.71508	6.71923e-06	1.72918e-05	WP_011243974.1	phosphate ABC transporter permease PstA
gene-H6G84_RS00690	0.397832	0.0132102	0.0208545	WP_011378464.1	phosphate ABC transporter ATP-binding protein PstB
gene-H6G84_RS00695	0.593883	0.00167445	0.00307672	WP_011378463.1	polyribonucleotide nucleotidyltransferase
gene-H6G84_RS00700	0.481172	0.0012548	0.00234913	WP_011243977.1	fatty acid desaturase
gene-H6G84_RS00705	-0.917536	0.0154858	0.0240223	NA	NA
gene-H6G84_RS00710	0.578838	8.77455e-05	0.000193952	WP_011243978.1	chemotaxis protein CheA
gene-H6G84_RS00715	0.35109	0.0308267	0.0452271	WP_234909999.1	isoleucine--tRNA ligase
gene-H6G84_RS00720	1.05617	1.80714e-13	1.05018e-12	WP_011243980.1	peptide-methionine (S)-S-oxide reductase MsrA
gene-H6G84_RS00725	-1.24026	3.78501e-14	2.33641e-13	WP_234909998.1	class I SAM-dependent methyltransferase
gene-H6G84_RS00730	-0.977842	6.55298e-09	2.40815e-08	WP_011243982.1	acetolactate synthase small subunit
gene-H6G84_RS00735	0.417451	0.00398815	0.00690644	WP_011378462.1	alpha/beta fold hydrolase
gene-H6G84_RS00740	0.614997	0.0018155	0.00331543	WP_011378461.1	Uma2 family endonuclease
gene-H6G84_RS00745	-1.18916	6.13957e-11	2.78306e-10	WP_011378460.1	hypothetical protein
gene-H6G84_RS00750	-0.607501	0.000323918	0.000663439	WP_011243986.1	SAM-dependent methyltransferase
gene-H6G84_RS00755	0.268634	0.0535929	0.0748569	WP_199290609.1	MotA/TolQ/ExbB proton channel family protein
gene-H6G84_RS00760	0.658851	7.79772e-05	0.00017365	WP_011243988.1	biopolymer transporter ExbD
gene-H6G84_RS00765	0.215375	0.235049	0.284802	WP_011378458.1	sulfurtransferase
gene-H6G84_RS00770	0.555634	0.0199425	0.0303034	WP_011243990.1	cytochrome b6-f complex subunit PetM
gene-H6G84_RS00775	1.865	7.64544e-31	1.73578e-29	WP_011378457.1	NmrA family NAD(P)-binding protein
gene-H6G84_RS00780	-1.22769	3.78648e-13	2.14008e-12	WP_011378456.1	DUF975 family protein
gene-H6G84_RS00790	0.360526	0.0152055	0.0236285	WP_011243994.1	hypothetical protein
gene-H6G84_RS00795	0.295244	0.0757018	0.103104	WP_011243995.1	FTR1 family protein
gene-H6G84_RS00800	0.30677	0.0854002	0.114892	WP_242021677.1	serine O-acetyltransferase
gene-H6G84_RS00805	-0.602971	0.0129259	0.0204539	WP_011243997.1	hypothetical protein
gene-H6G84_RS00810	-0.042801	0.881216	0.897976	WP_011243998.1	LysR family transcriptional regulator
gene-H6G84_RS00815	1.00636	2.89041e-11	1.36328e-10	WP_011243999.1	sugar ABC transporter substrate-binding protein
gene-H6G84_RS00820	2.88151	1.09679e-33	2.96799e-32	WP_011244000.1	response regulator
gene-H6G84_RS00825	0.152747	0.278553	0.330636	WP_011244001.1	lysine--tRNA ligase
gene-H6G84_RS00830	2.17974	1.50939e-35	4.54343e-34	WP_011244002.1	class I SAM-dependent methyltransferase
gene-H6G84_RS00835	-0.347537	0.0132315	0.0208679	WP_011378453.1	SPFH domain-containing protein
gene-H6G84_RS00840	1.61976	8.82087e-18	7.38472e-17	WP_011244004.1	PH domain-containing protein
gene-H6G84_RS00845	1.87173	2e-28	3.3e-27	WP_011244005.1	adenosine deaminase
gene-H6G84_RS00850	-0.749197	0.000113636	0.000247907	WP_011378451.1	adenylosuccinate synthase
gene-H6G84_RS00855	1.33004	1.66073e-15	1.15862e-14	WP_011378450.1	RidA family protein
gene-H6G84_RS00860	0.834188	1.80363e-07	5.612e-07	WP_011244008.1	AhpC/TSA family protein
gene-H6G84_RS00865	0.0186686	0.895283	0.910232	WP_011244009.1	glycine oxidase ThiO
gene-H6G84_RS00870	-0.530817	0.0390331	0.0561297	WP_011378448.1	DNA-binding protein
gene-H6G84_RS00875	-1.3027	0.000359517	0.000731874	NA	NA
gene-H6G84_RS00880	-1.74854	6.0354e-24	8.12504e-23	WP_011378447.1	ComF family protein
gene-H6G84_RS00885	-1.23281	6.15925e-17	4.86744e-16	WP_011244012.1	DUF2470 domain-containing protein
gene-H6G84_RS00890	-0.0300316	0.876765	0.89412	WP_231621378.1	agmatine deiminase family protein
gene-H6G84_RS00895	-0.262533	0.184102	0.228549	WP_011244014.1	Hsp20/alpha crystallin family protein
gene-H6G84_RS00900	-1.03361	7.85005e-13	4.33614e-12	WP_199290607.1	F420-0:Gamma-glutamyl ligase
gene-H6G84_RS00905	0.527844	0.000803434	0.00154849	WP_011378445.1	N-acetyltransferase
gene-H6G84_RS00910	0.276398	0.086205	0.115703	WP_011378444.1	Holliday junction resolvase RuvX
gene-H6G84_RS00915	-0.661366	0.000107943	0.000236451	WP_011244018.1	DUF3727 domain-containing protein
gene-H6G84_RS00920	-0.731856	5.75243e-05	0.000131379	WP_011244019.1	YqeG family HAD IIIA-type phosphatase
gene-H6G84_RS00925	-0.139955	0.435474	0.48936	WP_011244020.1	hypothetical protein
gene-H6G84_RS00930	0.536114	7.64561e-05	0.000170973	WP_011244021.1	sodium:proton antiporter
gene-H6G84_RS00940	-1.24016	2.58127e-16	1.94795e-15	WP_011378443.1	AAA family ATPase
gene-H6G84_RS00945	-0.654814	0.00537836	0.00908489	WP_234909997.1	SDR family oxidoreductase
gene-H6G84_RS00950	0.323774	0.0493274	0.0694419	WP_039755558.1	hydantoinase B/oxoprolinase family protein
gene-H6G84_RS00955	-1.26877	3.4972e-13	1.98076e-12	WP_242021678.1	J domain-containing protein
gene-H6G84_RS00960	-2.13763	5.56708e-18	4.7802e-17	WP_011244027.1	cupin domain-containing protein
gene-H6G84_RS00965	-0.657035	0.00168839	0.00309808	WP_231621380.1	c-type cytochrome
gene-H6G84_RS00975	-1.54031	2.66365e-10	1.13268e-09	WP_011244030.1	dihydroorotate dehydrogenase-like protein
gene-H6G84_RS00980	-2.54333	2.60856e-23	3.32778e-22	WP_011378437.1	pyruvate:ferredoxin (flavodoxin) oxidoreductase
gene-H6G84_RS00985	0.100227	0.547686	0.599367	WP_190528512.1	PIN/TRAM domain-containing protein
gene-H6G84_RS00990	0.0311578	0.833584	0.858252	WP_011244033.1	radical SAM family heme chaperone HemW
gene-H6G84_RS00995	-1.07127	1.04597e-09	4.15132e-09	WP_011244034.1	3-methyl-2-oxobutanoate hydroxymethyltransferase
gene-H6G84_RS01000	-0.437973	0.0840135	0.113319	NA	NA
gene-H6G84_RS01005	0.436216	0.0304923	0.0447856	WP_011244035.1	hypothetical protein
gene-H6G84_RS01010	-0.0133514	0.966094	0.972069	WP_199290606.1	bifunctional hydroxymethylpyrimidine kinase/phosphomethylpyrimidine kinase
gene-H6G84_RS01015	-0.272316	0.0435953	0.0620243	WP_011244037.1	cell division protein FtsZ
gene-H6G84_RS01020	-0.013045	0.983528	0.98732	WP_011378434.1	FtsQ-type POTRA domain-containing protein
gene-H6G84_RS01025	0.650806	6.33586e-05	0.000143602	WP_011244039.1	hypothetical protein
gene-H6G84_RS01030	0.78732	9.44698e-08	3.04188e-07	WP_199290605.1	D-alanine--D-alanine ligase
gene-H6G84_RS01035	-0.202151	0.171473	0.214562	WP_011244041.1	tRNA (N6-isopentenyl adenosine(37)-C2)-methylthiotransferase MiaB
gene-H6G84_RS01040	-0.692296	0.000456177	0.000912695	WP_199290604.1	dipeptide epimerase
gene-H6G84_RS01045	-0.624443	0.000897397	0.00171969	WP_011378433.1	DUF1611 domain-containing protein
gene-H6G84_RS01050	-0.235213	0.156795	0.198325	WP_011244044.1	acyl-ACP--UDP-N-acetylglucosamine O-acyltransferase
gene-H6G84_RS01055	0.116585	0.560796	0.611466	WP_011378432.1	hypothetical protein
gene-H6G84_RS01060	0.196616	0.263382	0.314578	WP_011378431.1	efflux RND transporter permease subunit
gene-H6G84_RS01065	0.163033	0.266455	0.318107	WP_011244046.1	efflux RND transporter periplasmic adaptor subunit
gene-H6G84_RS01070	-1.45117	8.58845e-05	0.000190152	NA	NA
gene-H6G84_RS01075	-1.72652	2.4584e-24	3.39481e-23	WP_011378430.1	DUF4359 domain-containing protein
gene-H6G84_RS01080	-1.36996	8.41376e-16	6.07858e-15	WP_011378429.1	Nif11-like leader peptide family natural product precursor
gene-H6G84_RS01085	-0.536565	0.000329524	0.000673889	WP_011378428.1	peptide chain release factor 3
gene-H6G84_RS01090	0.991361	4.79189e-10	1.97196e-09	WP_011244049.1	DUF1802 family protein
gene-H6G84_RS01095	0.154583	0.352398	0.407104	WP_011244050.1	hypothetical protein
gene-H6G84_RS01100	2.25225	2.63247e-43	1.28225e-41	WP_011378426.1	solanesyl diphosphate synthase
gene-H6G84_RS01105	-0.578091	0.000160541	0.000342068	WP_011244052.1	glutamate racemase
gene-H6G84_RS01110	-0.0808155	0.570741	0.620794	WP_011378425.1	N-acetylmuramoyl-L-alanine amidase
gene-H6G84_RS01115	0.0979753	0.647782	0.693054	WP_011378424.1	cation:proton antiporter
gene-H6G84_RS01120	0.613145	0.000107887	0.000236451	WP_011244055.1	carbon-nitrogen hydrolase family protein
gene-H6G84_RS01125	0.739897	6.46774e-07	1.87523e-06	WP_231621381.1	family 10 glycosylhydrolase
gene-H6G84_RS01130	-0.0361347	0.867803	0.885993	WP_011378422.1	Crp/Fnr family transcriptional regulator
gene-H6G84_RS01135	0.168132	0.334958	0.389645	WP_011244058.1	phasin family protein
gene-H6G84_RS01145	-2.25414	2.06598e-44	1.06438e-42	WP_199290602.1	lipoyl(octanoyl) transferase LipB
gene-H6G84_RS01150	-4.79146	1.1174e-79	7.4838e-77	WP_011378421.1	ribosome-associated translation inhibitor RaiA
gene-H6G84_RS01155	0.636248	8.77448e-05	0.000193952	WP_011378420.1	nickel pincer cofactor biosynthesis protein LarC
gene-H6G84_RS01160	-0.958949	6.07289e-11	2.7716e-10	WP_011244063.1	L-threonylcarbamoyladenylate synthase
gene-H6G84_RS01165	-0.990361	2.03544e-07	6.31128e-07	WP_011244064.1	type IV pilus twitching motility protein PilT
gene-H6G84_RS01175	0.632834	1.66301e-05	4.09862e-05	WP_049749354.1	hypothetical protein
gene-H6G84_RS01180	-0.469315	0.00227417	0.0041042	WP_011244067.1	TIGR01548 family HAD-type hydrolase
gene-H6G84_RS01185	-0.356657	0.054815	0.0764841	WP_039755568.1	30S ribosomal protein PSRP-3
gene-H6G84_RS01190	-0.482983	0.00106442	0.00202096	WP_011378416.1	HEAT repeat domain-containing protein
gene-H6G84_RS01195	-1.66707	7.759e-20	7.61406e-19	WP_011244070.1	photosystem I reaction center subunit VIII
gene-H6G84_RS01200	-1.60908	4.23559e-16	3.13457e-15	WP_011378415.1	photosystem I reaction center protein subunit XI
gene-H6G84_RS01205	0.862484	2.54099e-08	8.72734e-08	WP_011378414.1	CbiQ family ECF transporter T component
gene-H6G84_RS01210	0.113061	0.511764	0.565432	WP_011244073.1	ribosome biogenesis GTPase Der
gene-H6G84_RS01215	1.11361	3.44413e-09	1.30322e-08	WP_011378413.1	bifunctional ADP-heptose synthase
gene-H6G84_RS01220	0.317127	0.131794	0.169585	WP_011378412.1	hypothetical protein
gene-H6G84_RS01225	0.0361218	0.812561	0.841458	WP_011378411.1	peptidoglycan recognition protein family protein
gene-H6G84_RS01230	-0.950524	8.52575e-09	3.08239e-08	WP_011378410.1	hypothetical protein
gene-H6G84_RS01235	-0.865561	1.6723e-06	4.59968e-06	WP_011378409.1	class 1 fructose-bisphosphatase
gene-H6G84_RS01240	-0.000907415	0.996991	0.998481	WP_011244078.1	glucose-6-phosphate dehydrogenase
gene-H6G84_RS01245	0.269838	0.169435	0.212322	WP_011244079.1	glucose-6-phosphate dehydrogenase assembly protein OpcA
gene-H6G84_RS01250	1.29185	7.54963e-12	3.83785e-11	WP_011244080.1	cytochrome b6-f complex subunit IV
gene-H6G84_RS01255	1.65805	7.68491e-16	5.59453e-15	WP_011244081.1	cytochrome b6
gene-H6G84_RS01260	0.836975	4.63485e-09	1.72695e-08	WP_011378408.1	S41 family peptidase
gene-H6G84_RS01265	1.40715	5.43855e-20	5.41631e-19	WP_199290600.1	HD domain-containing protein
gene-H6G84_RS01270	-0.565625	0.00058981	0.00116184	WP_011244084.1	tetratricopeptide repeat protein
gene-H6G84_RS01275	0.0454943	0.854737	0.875656	WP_011244085.1	phosphate-starvation-inducible PsiE family protein
gene-H6G84_RS01280	-0.494398	0.00180565	0.00329968	WP_011244086.1	SIMPL domain-containing protein
gene-H6G84_RS01285	-0.346909	0.0224516	0.033734	WP_011244087.1	HEAT repeat domain-containing protein
gene-H6G84_RS01295	0.925796	6.72074e-11	3.04136e-10	WP_234909996.1	glutaredoxin
gene-H6G84_RS01300	-1.35118	2.01085e-11	9.68898e-11	WP_011378405.1	Asp-tRNA(Asn)/Glu-tRNA(Gln) amidotransferase subunit GatC
gene-H6G84_RS01305	-1.41431	1.02657e-18	9.25988e-18	WP_011244091.1	photosystem I assembly protein Ycf3
gene-H6G84_RS01310	-1.19317	6.05148e-08	1.98675e-07	WP_011244092.1	DUF3288 family protein
gene-H6G84_RS01315	-0.529387	0.0190038	0.0289675	WP_231621382.1	HigA family addiction module antitoxin
gene-H6G84_RS01320	-0.095275	0.610508	0.65764	WP_011244094.1	hypothetical protein
gene-H6G84_RS01325	-0.127209	0.40025	0.45493	WP_011378404.1	cation-translocating P-type ATPase
gene-H6G84_RS01330	0.706467	6.26067e-05	0.000142018	WP_011244096.1	ATP synthase F1 subunit epsilon
gene-H6G84_RS01335	0.672368	0.000529667	0.00104644	WP_011244097.1	F0F1 ATP synthase subunit beta
gene-H6G84_RS01340	0.521469	0.0164643	0.0253785	WP_011244098.1	co-chaperone GroES
gene-H6G84_RS01345	0.644013	0.0118922	0.0189638	WP_011244099.1	chaperonin GroEL
gene-H6G84_RS01355	-1.23408	1.85973e-16	1.41139e-15	WP_011378402.1	hypothetical protein
gene-H6G84_RS01360	-1.41948	3.8418e-10	1.59713e-09	NA	NA
gene-H6G84_RS01365	-0.477824	0.00304565	0.00536444	WP_011378401.1	pyridoxal-dependent decarboxylase
gene-H6G84_RS01370	1.26292	6.55933e-13	3.63819e-12	WP_011378400.1	peroxiredoxin
gene-H6G84_RS01375	-0.667627	8.88474e-06	2.25828e-05	WP_199290599.1	glycine cleavage system aminomethyltransferase GcvT
gene-H6G84_RS01380	-1.84868	4.42706e-19	4.10384e-18	WP_011244105.1	hypothetical protein
gene-H6G84_RS01385	-1.86737	1.7047e-31	4.15172e-30	WP_155813915.1	J domain-containing protein
gene-H6G84_RS01390	0.227063	0.132936	0.17089	WP_011244106.1	response regulator transcription factor
gene-H6G84_RS01400	-0.564904	0.00304311	0.00536349	WP_011378397.1	dihydropteroate synthase
gene-H6G84_RS01410	-2.25501	5.9461e-24	8.04522e-23	WP_011378396.1	hypothetical protein
gene-H6G84_RS01415	-0.931266	1.02216e-06	2.8825e-06	WP_011244110.1	PAM68 family protein
gene-H6G84_RS01420	-1.19124	8.80647e-12	4.43469e-11	WP_011244111.1	30S ribosomal protein S15
gene-H6G84_RS01425	-1.06881	3.51217e-06	9.39971e-06	WP_011244112.1	Holliday junction branch migration protein RuvA
gene-H6G84_RS01430	-0.955442	2.2689e-05	5.46126e-05	WP_011378395.1	transaldolase
gene-H6G84_RS01435	-1.2402	4.07009e-08	1.37327e-07	WP_011378394.1	type III glutamate--ammonia ligase
gene-H6G84_RS01440	-1.09105	4.66984e-08	1.56186e-07	WP_011378393.1	hypothetical protein
gene-H6G84_RS01445	-1.52061	1.07077e-20	1.11619e-19	WP_011378392.1	hypothetical protein
gene-H6G84_RS01450	0.610137	0.000193243	0.000406357	WP_011244117.1	hypothetical protein
gene-H6G84_RS01455	1.31231	3.06331e-13	1.74981e-12	WP_011378391.1	hypothetical protein
gene-H6G84_RS01460	-1.37867	3.98669e-23	5.0379e-22	WP_011244119.1	KpsF/GutQ family sugar-phosphate isomerase
gene-H6G84_RS01465	-0.983862	2.37982e-08	8.22651e-08	WP_011244120.1	3-deoxy-manno-octulosonate cytidylyltransferase
gene-H6G84_RS01470	0.462001	0.00158507	0.00292452	WP_011378390.1	3-deoxy-8-phosphooctulonate synthase
gene-H6G84_RS01475	0.747676	4.82097e-07	1.41772e-06	WP_011244122.1	HAD-IIIA family hydrolase
gene-H6G84_RS01480	0.961656	1.06283e-10	4.7063e-10	WP_011244123.1	hypothetical protein
gene-H6G84_RS01485	-0.665465	0.000744587	0.00144547	WP_199290547.1	hypothetical protein
gene-H6G84_RS01490	0.607244	0.000347993	0.000710575	WP_199290546.1	iron-containing alcohol dehydrogenase family protein
gene-H6G84_RS01495	0.440258	0.00239636	0.00429996	WP_011378388.1	alpha/beta hydrolase
gene-H6G84_RS01500	-0.185237	0.316296	0.369541	WP_011378387.1	DUF554 domain-containing protein
gene-H6G84_RS01505	-0.571619	0.000177595	0.000374922	WP_011378386.1	ATP-binding protein
gene-H6G84_RS01510	0.162679	0.300496	0.353703	WP_231621383.1	hypothetical protein
gene-H6G84_RS01515	-0.0115473	0.955366	0.96257	WP_011244130.1	tetratricopeptide repeat protein
gene-H6G84_RS01520	0.709653	0.000106118	0.000232874	WP_011378385.1	ammonium transporter
gene-H6G84_RS01525	-0.127496	0.397584	0.452149	WP_011244132.1	WYL domain-containing protein
gene-H6G84_RS01530	-1.48031	2.64341e-09	1.00735e-08	WP_041674898.1	hypothetical protein
gene-H6G84_RS01535	0.644595	0.00568859	0.00956669	WP_234909995.1	hypothetical protein
gene-H6G84_RS01540	-1.64538	3.2983e-09	1.25158e-08	NA	NA
gene-H6G84_RS01545	-0.247832	0.0880135	0.117541	WP_011244135.1	magnesium chelatase ATPase subunit D
gene-H6G84_RS01550	0.721419	3.59145e-06	9.58317e-06	WP_011244136.1	PD-(D/E)XK nuclease family protein
gene-H6G84_RS01555	-0.355001	0.248112	0.298738	WP_234909994.1	2-amino-4-hydroxy-6-hydroxymethyldihydropteridine diphosphokinase
gene-H6G84_RS01560	0.236093	0.121448	0.156648	WP_011244138.1	NUDIX hydrolase
gene-H6G84_RS01565	1.11693	4.63266e-13	2.59642e-12	WP_011244139.1	peptidase M42
gene-H6G84_RS01570	0.732143	9.20256e-07	2.60885e-06	WP_011244140.1	DUF2232 domain-containing protein
gene-H6G84_RS01575	0.955151	8.44977e-08	2.73063e-07	WP_011244141.1	TIGR00303 family protein
gene-H6G84_RS01580	-1.89089	1.54804e-23	2.00347e-22	WP_011378383.1	hypothetical protein
gene-H6G84_RS01585	0.408601	0.0196926	0.0299583	WP_011378382.1	extracellular solute-binding protein
gene-H6G84_RS01590	0.710216	1.88873e-06	5.16318e-06	WP_199290542.1	glutamate-5-semialdehyde dehydrogenase
gene-H6G84_RS01595	0.257614	0.114243	0.148428	WP_011244144.1	response regulator transcription factor
gene-H6G84_RS01600	1.2787	1.27878e-16	9.81621e-16	WP_011378381.1	histidine--tRNA ligase
gene-H6G84_RS01605	-0.17209	0.244067	0.294265	WP_011378380.1	hypothetical protein
gene-H6G84_RS01610	0.37697	0.0215983	0.032525	WP_011244147.1	divalent-cation tolerance protein CutA
gene-H6G84_RS01615	-0.276814	0.132206	0.170034	WP_155813916.1	hypothetical protein
gene-H6G84_RS01620	0.0172927	0.912936	0.926773	WP_011244148.1	hypothetical protein
gene-H6G84_RS01625	1.20686	2.9227e-17	2.39447e-16	WP_011244149.1	ribosome maturation factor RimM
gene-H6G84_RS01630	0.642945	7.48889e-06	1.91438e-05	WP_011244150.1	valine--pyruvate transaminase
gene-H6G84_RS01635	0.166267	0.276501	0.328636	WP_011378378.1	NAD(P)H dehydrogenase subunit NdhS
gene-H6G84_RS01640	-0.355017	0.0156768	0.0242764	WP_231621384.1	alpha/beta hydrolase
gene-H6G84_RS01645	-0.858045	1.14262e-09	4.52824e-09	WP_011244153.1	AbrB family transcriptional regulator
gene-H6G84_RS01650	-2.03598	2.61263e-30	1e-28	WP_011378377.1	DUF3370 family protein
gene-H6G84_RS01655	-0.718203	1.42809e-06	3.94826e-06	WP_199290598.1	glutamate--cysteine ligase
gene-H6G84_RS01660	-0.132923	0.380366	0.435656	WP_011244156.1	phosphoenolpyruvate carboxylase
gene-H6G84_RS01665	-2.26941	8.43521e-17	6.56917e-16	WP_039755578.1	hypothetical protein
gene-H6G84_RS01670	-1.72917	1.04283e-08	3.72497e-08	NA	NA
gene-H6G84_RS01675	-0.587002	0.000730629	0.00142043	WP_011378373.1	DNA replication/repair protein RecF
gene-H6G84_RS01680	-0.448527	0.0505744	0.0708994	WP_039755580.1	hypothetical protein
gene-H6G84_RS01685	1.12132	5.64381e-10	2.29088e-09	WP_011378372.1	adenosylmethionine decarboxylase
gene-H6G84_RS01690	-0.2511	0.114449	0.148613	WP_011244160.1	HU family DNA-binding protein
gene-H6G84_RS01695	-4.16502	8.08955e-54	7.73996e-52	WP_039755581.1	hypothetical protein
gene-H6G84_RS01700	0.527763	0.000266073	0.000551283	WP_011378371.1	DNA mismatch repair protein MutS
gene-H6G84_RS01705	1.46902	2.58922e-22	3.04234e-21	WP_242021679.1	glycosyltransferase family 39 protein
gene-H6G84_RS01710	-0.581619	6.66505e-05	0.000150427	WP_011244163.1	photosystem II reaction center protein PsbZ
gene-H6G84_RS01715	-0.865522	3.51197e-08	1.19096e-07	WP_011244164.1	6%2C7-dimethyl-8-ribityllumazine synthase
gene-H6G84_RS01720	-2.0845	2.50566e-16	1.89623e-15	NA	NA
gene-H6G84_RS01725	-2.20603	1.24418e-40	4.97484e-39	WP_011378369.1	glutamate-5-semialdehyde dehydrogenase
gene-H6G84_RS01735	0.223615	0.135441	0.173944	WP_011244168.1	GNAT family N-acetyltransferase
gene-H6G84_RS01740	-0.543802	0.00023729	0.00049548	WP_231621385.1	diheme cytochrome c
gene-H6G84_RS01745	-0.599733	0.000147537	0.000316202	WP_011378368.1	MFS transporter
gene-H6G84_RS01750	-1.42439	1.04416e-11	5.21098e-11	WP_011244171.1	cobalamin biosynthesis protein
gene-H6G84_RS01755	0.301381	0.0410289	0.058716	WP_011244172.1	ABC transporter ATP-binding protein
gene-H6G84_RS01760	0.676284	1.21434e-05	3.05179e-05	WP_011244173.1	tRNA (guanosine(37)-N1)-methyltransferase TrmD
gene-H6G84_RS01765	0.494446	0.00187389	0.0034174	WP_011244174.1	NAD(P)H-quinone oxidoreductase subunit N
gene-H6G84_RS01770	0.996705	2.77673e-08	9.48835e-08	WP_199290596.1	50S ribosomal protein L3
gene-H6G84_RS01775	1.80224	1.00612e-16	7.79015e-16	WP_011244176.1	50S ribosomal protein L4
gene-H6G84_RS01780	1.59495	2.92013e-14	1.82781e-13	WP_199290541.1	50S ribosomal protein L23
gene-H6G84_RS01785	1.19881	1.30769e-07	4.12154e-07	WP_011378366.1	50S ribosomal protein L2
gene-H6G84_RS01790	0.926776	8.0389e-06	2.05302e-05	WP_011244179.1	30S ribosomal protein S19
gene-H6G84_RS01795	0.6698	0.000237799	0.000496106	WP_011244180.1	50S ribosomal protein L22
gene-H6G84_RS01805	0.298272	0.130174	0.167662	WP_011244182.1	50S ribosomal protein L16
gene-H6G84_RS01810	0.259469	0.159829	0.201498	WP_011244183.1	50S ribosomal protein L29
gene-H6G84_RS01815	0.250015	0.183512	0.227923	WP_011244184.1	30S ribosomal protein S17
gene-H6G84_RS01820	0.412402	0.0276349	0.0408576	WP_011244185.1	50S ribosomal protein L14
gene-H6G84_RS01825	0.337242	0.0675167	0.092996	WP_011244186.1	50S ribosomal protein L24
gene-H6G84_RS01830	0.300235	0.124352	0.160318	WP_011244187.1	50S ribosomal protein L5
gene-H6G84_RS01835	0.284736	0.114131	0.148354	WP_011244188.1	30S ribosomal protein S8
gene-H6G84_RS01845	0.304571	0.108943	0.142092	WP_011244190.1	50S ribosomal protein L18
gene-H6G84_RS01850	0.278331	0.137433	0.176333	WP_011244191.1	30S ribosomal protein S5
gene-H6G84_RS01855	-0.0244551	0.888255	0.903773	WP_011244192.1	50S ribosomal protein L15
gene-H6G84_RS01860	0.555761	0.00238018	0.00427379	WP_011244193.1	preprotein translocase subunit SecY
gene-H6G84_RS01865	0.650238	0.000306935	0.000631067	WP_199290595.1	adenylate kinase
gene-H6G84_RS01870	0.325211	0.0854289	0.114892	WP_011244195.1	50S ribosomal protein L36
gene-H6G84_RS01875	0.82651	2.72615e-06	7.34744e-06	WP_199290594.1	30S ribosomal protein S13
gene-H6G84_RS01880	1.21034	3.59853e-10	1.50397e-09	WP_011244197.1	30S ribosomal protein S11
gene-H6G84_RS01890	1.40244	5.88588e-14	3.56749e-13	WP_011244199.1	50S ribosomal protein L17
gene-H6G84_RS01895	0.965967	5.20402e-08	1.72896e-07	WP_011378365.1	tRNA pseudouridine(38-40) synthase TruA
gene-H6G84_RS01900	1.12965	7.03502e-10	2.83411e-09	WP_011244201.1	50S ribosomal protein L13
gene-H6G84_RS01905	1.13854	7.00354e-11	3.15867e-10	WP_011244202.1	30S ribosomal protein S9
gene-H6G84_RS01910	0.938736	1.42064e-09	5.59689e-09	WP_011244203.1	50S ribosomal protein L31
gene-H6G84_RS01915	0.122623	0.397635	0.452149	WP_011244204.1	peptide chain release factor 1
gene-H6G84_RS01920	-0.540607	0.00459726	0.00784963	WP_011244205.1	HNH endonuclease
gene-H6G84_RS01930	-3.09615	6.05455e-22	6.96143e-21	NA	NA
gene-H6G84_RS01935	-2.84229	6.17383e-38	2.14801e-36	WP_011378363.1	cupin domain-containing protein
gene-H6G84_RS01940	0.061642	0.697513	0.735684	WP_011378362.1	trans-splicing intein-formed DNA polymerase III subunit alpha N-terminal partner DnaE-N
gene-H6G84_RS01945	0.74316	3.22214e-05	7.6188e-05	WP_011244209.1	DNA double-strand break repair nuclease NurA
gene-H6G84_RS01950	0.183882	0.275637	0.327755	WP_011378361.1	glutamate 5-kinase
gene-H6G84_RS01955	-0.567461	0.00268172	0.00477363	WP_011378360.1	FecR family protein
gene-H6G84_RS01960	-0.543561	0.00510027	0.00865333	WP_011378359.1	adenylate/guanylate cyclase domain-containing protein
gene-H6G84_RS01965	-0.197521	0.414871	0.469602	WP_234909992.1	DUF3307 domain-containing protein
gene-H6G84_RS01970	-0.356557	0.0437002	0.0621406	WP_199290540.1	HD family phosphohydrolase
gene-H6G84_RS01975	0.363212	0.0126383	0.0200462	WP_011378357.1	sensor domain-containing diguanylate cyclase
gene-H6G84_RS01980	-1.08477	6.8047e-07	1.9623e-06	WP_011244216.1	sulfite exporter TauE/SafE family protein
gene-H6G84_RS01985	-0.0885796	0.549006	0.600566	WP_011244217.1	peptide-methionine (R)-S-oxide reductase MsrB
gene-H6G84_RS01990	-0.840592	0.00114265	0.00216184	WP_155813919.1	hypothetical protein
gene-H6G84_RS01995	-1.76474	2.3815e-24	3.30567e-23	WP_011244218.1	isochorismate synthase
gene-H6G84_RS02000	-1.23189	4.25725e-13	2.39604e-12	WP_011244219.1	hypothetical protein
gene-H6G84_RS02005	-0.538561	0.0154553	0.0239888	WP_011378355.1	cation:proton antiporter
gene-H6G84_RS02010	-2.29846	3e-28	5.3e-27	WP_199290539.1	hypothetical protein
gene-H6G84_RS02015	-0.783178	1.28775e-07	4.06825e-07	WP_011244222.1	class II glutamine amidotransferase
gene-H6G84_RS02020	-0.0907752	0.569325	0.619757	WP_081429506.1	ribonuclease HI
gene-H6G84_RS02025	-0.46355	0.0487443	0.0686934	WP_011378353.1	hypothetical protein
gene-H6G84_RS02030	0.807614	2.70632e-07	8.29545e-07	WP_011378352.1	site-2 protease family protein
gene-H6G84_RS02035	0.742062	1.13299e-06	3.17497e-06	WP_011244225.1	peroxiredoxin
gene-H6G84_RS02040	0.281395	0.0702931	0.096473	WP_231621387.1	lipid kinase
gene-H6G84_RS02045	1.00969	1.11331e-11	5.53352e-11	WP_011244227.1	phage holin family protein
gene-H6G84_RS02050	0.00612332	0.983634	0.98732	WP_039755585.1	branched-chain amino acid ABC transporter permease
gene-H6G84_RS02055	0.353987	0.031524	0.0461238	WP_011244229.1	FAD-binding oxidoreductase
gene-H6G84_RS02060	-0.862729	3.84021e-05	8.96161e-05	WP_231621388.1	Fe(3+) ABC transporter substrate-binding protein
gene-H6G84_RS02065	-2.50913	1.61143e-13	9.42582e-13	WP_011244231.1	Crp/Fnr family transcriptional regulator
gene-H6G84_RS02070	-3.04077	1.5331e-24	2.19642e-23	WP_011244232.1	(2Fe-2S) ferredoxin domain-containing protein
gene-H6G84_RS02075	-3.06948	1.87464e-32	4.783e-31	WP_011244233.1	hypothetical protein
gene-H6G84_RS02080	-0.215072	0.225273	0.274219	WP_011244234.1	DNA starvation/stationary phase protection protein
gene-H6G84_RS02085	-1.19498	0.0061317	0.0102796	WP_234909990.1	transcriptional repressor
gene-H6G84_RS02090	-2.37592	3.24879e-21	3.45377e-20	WP_231621389.1	hypothetical protein
gene-H6G84_RS02095	0.400383	0.00743437	0.0122564	WP_011378349.1	DNA helicase PcrA
gene-H6G84_RS02110	0.840959	0.000113299	0.000247374	WP_011244240.1	hypothetical protein
gene-H6G84_RS02115	2.51673	1.4e-27	2.57e-26	WP_011244241.1	Rieske 2Fe-2S domain-containing protein
gene-H6G84_RS02120	0.164269	0.420759	0.475618	WP_011378348.1	hypothetical protein
gene-H6G84_RS02125	-1.18042	9.68752e-06	2.45301e-05	WP_039755588.1	hypothetical protein
gene-H6G84_RS02130	-0.595269	0.00657244	0.0109432	WP_155813921.1	hypothetical protein
gene-H6G84_RS02135	-1.08164	1.71276e-09	6.67902e-09	WP_242021680.1	class I SAM-dependent methyltransferase
gene-H6G84_RS02140	-0.862208	1.24619e-07	3.95092e-07	WP_011378346.1	alanine--glyoxylate aminotransferase family protein
gene-H6G84_RS02145	-0.161748	0.310808	0.36424	WP_011244245.1	alpha/beta hydrolase
gene-H6G84_RS02150	-0.800527	2.7898e-06	7.51144e-06	WP_011244246.1	allophycocyanin subunit beta
gene-H6G84_RS02155	0.207237	0.282419	0.334779	WP_011378345.1	type I glutamate--ammonia ligase
gene-H6G84_RS02160	-0.235732	0.14063	0.180004	WP_039755593.1	hypothetical protein
gene-H6G84_RS02165	0.304925	0.0790262	0.107141	WP_011378343.1	hypothetical protein
gene-H6G84_RS02170	-1.49664	1.04453e-11	5.21098e-11	WP_196794057.1	hypothetical protein
gene-H6G84_RS02175	-3.60724	6.26831e-69	1.86587e-66	WP_199290589.1	HlyD family efflux transporter periplasmic adaptor subunit
gene-H6G84_RS02180	-2.29747	2.639e-25	4.063e-24	WP_011378340.1	glycosyltransferase
gene-H6G84_RS02185	1.06414	6.12207e-11	2.77983e-10	WP_011244252.1	linear amide C-N hydrolase
gene-H6G84_RS02190	1.71588	2.1627e-24	3.04941e-23	WP_011244253.1	ABC transporter permease
gene-H6G84_RS02195	1.08236	8.41175e-14	5.0078e-13	WP_011244254.1	ABC transporter ATP-binding protein
gene-H6G84_RS02200	0.185037	0.248694	0.299305	WP_011244255.1	PIN domain-containing protein
gene-H6G84_RS02205	0.619061	0.000403157	0.000814523	WP_162010013.1	hypothetical protein
gene-H6G84_RS02210	-0.746447	1.06845e-05	2.69781e-05	WP_011378338.1	carbon-nitrogen hydrolase
gene-H6G84_RS02215	-0.856908	4.1936e-05	9.72696e-05	WP_011378337.1	thermonuclease family protein
gene-H6G84_RS02220	0.382925	0.0252058	0.0375355	WP_199290588.1	tryptophan synthase subunit beta
gene-H6G84_RS02225	0.118783	0.488274	0.542774	WP_011378336.1	translation initiation factor
gene-H6G84_RS02230	0.454326	0.00544507	0.00918598	WP_011244260.1	hypothetical protein
gene-H6G84_RS02235	-0.907804	0.0173792	0.026758	WP_011244261.1	cupin domain-containing protein
gene-H6G84_RS02245	-0.685706	0.00706871	0.0116895	WP_011244262.1	cytidine deaminase
gene-H6G84_RS02250	-0.227587	0.341691	0.396788	WP_011244263.1	glutathione S-transferase family protein
gene-H6G84_RS02260	-0.879287	1.4326e-06	3.95664e-06	WP_011378335.1	type II toxin-antitoxin system HicA family toxin
gene-H6G84_RS02265	0.44617	0.0274785	0.0406712	WP_039755600.1	hypothetical protein
gene-H6G84_RS02270	1.38868	6.52888e-13	3.62881e-12	WP_011244265.1	magnesium chelatase subunit H
gene-H6G84_RS02275	0.47438	0.000699694	0.00136425	WP_011378334.1	4-hydroxy-tetrahydrodipicolinate reductase
gene-H6G84_RS02280	0.620695	3.29595e-05	7.77276e-05	WP_011244267.1	hypothetical protein
gene-H6G84_RS02285	0.378582	0.0214018	0.0322654	WP_199290586.1	N-acetylmuramoyl-L-alanine amidase
gene-H6G84_RS02290	0.403868	0.0116252	0.0185818	WP_011244269.1	hypothetical protein
gene-H6G84_RS02295	0.720507	6.84755e-07	1.97254e-06	WP_011378332.1	phosphoglucosamine mutase
gene-H6G84_RS02300	1.01177	4.70665e-07	1.39173e-06	WP_049749333.1	hypothetical protein
gene-H6G84_RS02305	0.0184864	0.893441	0.908705	WP_011378331.1	transglycosylase SLT domain-containing protein
gene-H6G84_RS02310	0.471845	0.00443676	0.00762906	WP_011244272.1	hypothetical protein
gene-H6G84_RS02315	0.418621	0.0130379	0.0206068	WP_011244273.1	4Fe-4S binding protein
gene-H6G84_RS02320	1.0129	1.49479e-10	6.51145e-10	WP_011244274.1	thioredoxin family protein
gene-H6G84_RS02325	2.30191	1.16552e-40	4.73094e-39	WP_011378330.1	NblA/ycf18 family protein
gene-H6G84_RS02330	1.11709	2.06174e-07	6.3707e-07	WP_011244276.1	hypothetical protein
gene-H6G84_RS02335	-0.339242	0.0262088	0.0388994	WP_011244277.1	hypothetical protein
gene-H6G84_RS02340	1.00307	1.10142e-07	3.52112e-07	WP_011378329.1	histone deacetylase
gene-H6G84_RS02345	1.09259	3.92612e-15	2.6628e-14	WP_011378328.1	anthranilate phosphoribosyltransferase
gene-H6G84_RS02350	-0.211924	0.160209	0.201882	WP_011378327.1	glutamine-hydrolyzing carbamoyl-phosphate synthase small subunit
gene-H6G84_RS02355	-0.595036	0.00310016	0.00545327	WP_011244281.1	STAS domain-containing protein
gene-H6G84_RS02360	-0.64228	0.00277176	0.00491107	WP_011378326.1	ribonuclease III
gene-H6G84_RS02365	2.51604	2.47868e-45	1.38341e-43	WP_011378325.1	23S rRNA (guanosine(2251)-2'-O)-methyltransferase RlmB
gene-H6G84_RS02370	2.01425	9.55798e-43	4.33997e-41	WP_011244284.1	DUF1816 domain-containing protein
gene-H6G84_RS02375	-0.507591	0.000365791	0.000742953	WP_011378324.1	Asp-tRNA(Asn)/Glu-tRNA(Gln) amidotransferase subunit GatA
gene-H6G84_RS02380	-0.0594836	0.692105	0.731998	WP_011378323.1	alpha/beta fold hydrolase
gene-H6G84_RS02385	-1.48677	9.25573e-16	6.66562e-15	WP_011244287.1	GNAT family N-acetyltransferase
gene-H6G84_RS02390	-2.20575	8.30089e-09	3.01738e-08	NA	NA
gene-H6G84_RS02395	-0.824136	7.57906e-08	2.46412e-07	WP_011378322.1	two component system sensor histidine kinase SasA
gene-H6G84_RS02400	1.11308	6.30927e-12	3.24425e-11	WP_199290584.1	ribose-phosphate pyrophosphokinase
gene-H6G84_RS02405	0.398426	0.0122833	0.019541	WP_011244290.1	AAA family ATPase
gene-H6G84_RS02410	-0.115503	0.45934	0.512311	WP_011378320.1	ROK family protein
gene-H6G84_RS02415	0.389454	0.0116318	0.0185818	WP_199290538.1	methionyl-tRNA formyltransferase
gene-H6G84_RS02420	0.707935	1.737e-06	4.75809e-06	WP_011378319.1	ABC transporter ATP-binding protein/permease
gene-H6G84_RS02425	-2.79422	1.39781e-44	7.34262e-43	WP_011378318.1	hypothetical protein
gene-H6G84_RS02430	0.733663	0.00488673	0.00830978	WP_011378317.1	ABC transporter substrate-binding protein
gene-H6G84_RS02435	0.235332	0.323666	0.377	WP_011244297.1	ABC transporter permease
gene-H6G84_RS02440	-0.183628	0.314373	0.367776	WP_011244298.1	ABC transporter ATP-binding protein
gene-H6G84_RS02445	-0.452733	0.0112762	0.0180893	WP_011244299.1	cyanase
gene-H6G84_RS02450	-0.403144	0.0175836	0.0270106	WP_011244300.1	DUF3291 domain-containing protein
gene-H6G84_RS02455	0.506442	0.0155922	0.0241593	WP_011244301.1	2Fe-2S iron-sulfur cluster-binding protein
gene-H6G84_RS02460	-0.112943	0.489664	0.544093	WP_011244302.1	glucose-1-phosphate thymidylyltransferase RfbA
gene-H6G84_RS02465	-0.124323	0.437069	0.490535	WP_011244303.1	dTDP-glucose 4%2C6-dehydratase
gene-H6G84_RS02470	0.0257796	0.93194	0.941783	WP_011244304.1	dTDP-4-dehydrorhamnose reductase
gene-H6G84_RS02475	-0.575503	0.0279183	0.0412539	WP_011244305.1	dTDP-4-dehydrorhamnose 3%2C5-epimerase
gene-H6G84_RS02480	-1.45761	8.35388e-09	3.02433e-08	WP_011378316.1	DUF1853 family protein
gene-H6G84_RS02485	-1.86712	7.628e-25	1.12902e-23	WP_011378315.1	diguanylate cyclase
gene-H6G84_RS02490	-1.17094	5.8224e-08	1.9186e-07	WP_011244308.1	hypothetical protein
gene-H6G84_RS02495	0.0521079	0.837974	0.861117	WP_011244309.1	fasciclin domain-containing protein
gene-H6G84_RS02500	-0.301736	0.0691962	0.0951625	WP_011378314.1	CO2 hydration protein
gene-H6G84_RS02505	0.413053	0.077309	0.105186	WP_011378313.1	proton-translocating NADH-quinone oxidoreductase subunit NdhD3
gene-H6G84_RS02510	0.829984	0.000199501	0.000418859	WP_011378312.1	NAD(P)H-quinone oxidoreductase subunit F
gene-H6G84_RS02515	0.112214	0.427549	0.481667	WP_011378311.1	homoserine dehydrogenase
gene-H6G84_RS02520	0.49249	0.0103266	0.0166556	WP_011244314.1	vitamin K epoxide reductase family protein
gene-H6G84_RS02525	2.50443	8.46481e-43	3.90987e-41	WP_011378310.1	hypothetical protein
gene-H6G84_RS02530	0.431451	0.0014561	0.00270145	WP_011378309.1	imidazole glycerol phosphate synthase subunit HisF
gene-H6G84_RS02535	-0.251689	0.182082	0.226461	WP_011244317.1	DUF2862 domain-containing protein
gene-H6G84_RS02540	0.337949	0.0321651	0.0470105	WP_011244318.1	ArsA family ATPase
gene-H6G84_RS02545	1.55682	4.38891e-15	2.95425e-14	WP_231621399.1	chlorophyll synthase ChlG
gene-H6G84_RS02550	-0.988521	2.58311e-08	8.86061e-08	WP_011244320.1	MarC family protein
gene-H6G84_RS02555	-1.08121	0.000119314	0.000259239	WP_011244321.1	elongation factor G
gene-H6G84_RS02560	-0.340234	0.0323628	0.0472222	WP_011378307.1	glycosyltransferase
gene-H6G84_RS02565	0.0919887	0.654882	0.698141	WP_011244323.1	phosphoketolase family protein
gene-H6G84_RS02570	-1.60839	3.67658e-22	4.30111e-21	WP_011378306.1	acetate/propionate family kinase
gene-H6G84_RS02575	-0.68171	7.54481e-05	0.000169207	WP_011378305.1	histidine phosphatase family protein
gene-H6G84_RS02580	0.894457	1.30463e-09	5.15504e-09	WP_011244326.1	DUF393 domain-containing protein
gene-H6G84_RS02585	0.737102	1.21767e-06	3.39099e-06	WP_011378304.1	small ribosomal subunit biogenesis GTPase RsgA
gene-H6G84_RS02590	0.586469	0.000227445	0.000475293	WP_011244328.1	sulfurtransferase TusA family protein
gene-H6G84_RS02595	0.443894	0.00255135	0.00455065	WP_011244329.1	molecular chaperone DnaJ
gene-H6G84_RS02600	0.309258	0.0296996	0.0436691	WP_011378303.1	molecular chaperone DnaK
gene-H6G84_RS02605	-0.220178	0.152385	0.193296	WP_011378302.1	nucleotide exchange factor GrpE
gene-H6G84_RS02610	-0.122663	0.403916	0.458125	WP_011378301.1	type II/IV secretion system protein
gene-H6G84_RS02615	0.148811	0.345207	0.400175	WP_011378300.1	type IV pilus twitching motility protein PilT
gene-H6G84_RS02620	0.289836	0.0859886	0.115528	WP_011378299.1	type II secretion system F family protein
gene-H6G84_RS02625	-0.299991	0.0321833	0.0470115	WP_011244335.1	hypothetical protein
gene-H6G84_RS02630	-0.360027	0.0133931	0.0210935	WP_011378298.1	NAD(P)/FAD-dependent oxidoreductase
gene-H6G84_RS02635	-0.965054	1.02292e-09	4.06589e-09	WP_011244337.1	tRNA dihydrouridine(20/20a) synthase DusA
gene-H6G84_RS02640	-0.616919	0.00187819	0.0034229	WP_011378297.1	hypothetical protein
gene-H6G84_RS02645	-0.253728	0.071126	0.0973666	WP_011244339.1	phenylalanine--tRNA ligase subunit alpha
gene-H6G84_RS02650	0.140774	0.333481	0.388096	WP_011244340.1	5'/3'-nucleotidase SurE
gene-H6G84_RS02655	0.709248	5.88785e-07	1.722e-06	WP_199290583.1	lycopene cyclase family protein
gene-H6G84_RS02660	-1.18671	5.52391e-12	2.85686e-11	WP_011244342.1	PipX family protein
gene-H6G84_RS02665	-1.12986	3.4113e-10	1.43019e-09	WP_011244343.1	YggS family pyridoxal phosphate-dependent enzyme
gene-H6G84_RS02670	-0.439981	0.00703586	0.0116424	WP_199290582.1	cell division protein SepF
gene-H6G84_RS02675	0.13934	0.364318	0.418888	WP_011378294.1	pyrroline-5-carboxylate reductase
gene-H6G84_RS02680	-1.93166	6.51888e-37	2.12977e-35	WP_011244346.1	glycerol-3-phosphate 1-O-acyltransferase PlsY
gene-H6G84_RS02685	-2.47921	4.97379e-43	2.37943e-41	WP_011244347.1	DUF2949 domain-containing protein
gene-H6G84_RS02690	0.424235	0.00191638	0.00349014	WP_011244348.1	FAD-dependent hydroxylase
gene-H6G84_RS02695	1.22452	4.83996e-17	3.88212e-16	WP_011378292.1	class I SAM-dependent methyltransferase
gene-H6G84_RS02700	0.865698	4.29492e-09	1.607e-08	WP_011378291.1	S9 family peptidase
gene-H6G84_RS02705	-0.623924	3.34307e-05	7.8631e-05	WP_011244351.1	ABC transporter permease
gene-H6G84_RS02710	-0.305763	0.0486191	0.0685529	WP_011244352.1	TM0106 family RecB-like putative nuclease
gene-H6G84_RS02715	-0.93022	7.25224e-11	3.2544e-10	WP_126147644.1	hypothetical protein
gene-H6G84_RS02720	-1.90023	2.64952e-21	2.86212e-20	WP_011244354.1	photosystem I core protein PsaA
gene-H6G84_RS02725	-1.99428	1.78289e-21	1.94954e-20	WP_011244355.1	photosystem I core protein PsaB
gene-H6G84_RS02730	-0.374433	0.00657908	0.0109474	WP_011244356.1	aminomethyl-transferring glycine dehydrogenase
gene-H6G84_RS02735	-1.35061	2.34335e-09	9.01989e-09	WP_011244357.1	glycine cleavage system protein GcvH
gene-H6G84_RS02740	-0.00495186	0.971931	0.97667	WP_011378289.1	chromosome segregation protein SMC
gene-H6G84_RS02745	-0.239296	0.115944	0.150055	WP_011244359.1	PRC-barrel domain-containing protein
gene-H6G84_RS02750	2.48618	2.51899e-56	3.21351e-54	WP_011244360.1	adenosylmethionine decarboxylase
gene-H6G84_RS02755	1.95517	7e-28	1.23e-26	WP_011244361.1	hypothetical protein
gene-H6G84_RS02765	-0.406047	0.10235	0.134542	WP_011244364.1	DNA/RNA nuclease SfsA
gene-H6G84_RS02770	-0.318701	0.0779909	0.10606	WP_011378287.1	hypothetical protein
gene-H6G84_RS02775	-1.24163	7.75966e-15	5.13287e-14	WP_011244366.1	XRE family transcriptional regulator
gene-H6G84_RS02780	-0.655835	2.01537e-05	4.89942e-05	WP_011244367.1	hypothetical protein
gene-H6G84_RS02785	0.300966	0.0655581	0.0906244	WP_011378286.1	aromatic ring-hydroxylating dioxygenase subunit alpha
gene-H6G84_RS02790	0.349789	0.0394937	0.0566704	WP_011378285.1	aromatic ring-hydroxylating dioxygenase subunit alpha
gene-H6G84_RS02795	0.96871	4.80093e-08	1.6037e-07	WP_011378284.1	glycosyltransferase
gene-H6G84_RS02800	0.420948	0.037166	0.0537332	WP_011378283.1	hypothetical protein
gene-H6G84_RS02805	-0.090616	0.60117	0.648624	WP_011378282.1	tetracycline resistance MFS efflux pump
gene-H6G84_RS02810	0.662026	2.3051e-05	5.54341e-05	WP_011378281.1	phycobiliprotein lyase
gene-H6G84_RS02815	-1.27921	6.10867e-11	2.77846e-10	WP_199290537.1	phycobilisome rod-core linker polypeptide
gene-H6G84_RS02820	-0.77285	1.7176e-05	4.22539e-05	WP_011244376.1	glucose-6-phosphate isomerase
gene-H6G84_RS02825	-0.153035	0.347436	0.402239	WP_173282579.1	glycosyltransferase family 4 protein
gene-H6G84_RS02830	-0.0854578	0.57658	0.626636	WP_199290580.1	glycosyltransferase
gene-H6G84_RS02835	-0.570324	0.000299258	0.000617176	WP_011244379.1	undecaprenyl-phosphate glucose phosphotransferase
gene-H6G84_RS02840	-0.452592	0.00271053	0.00480784	WP_011244380.1	glycosyltransferase
gene-H6G84_RS02845	-0.555919	0.00137492	0.00255971	WP_011244381.1	DUF72 domain-containing protein
gene-H6G84_RS02850	-0.264326	0.117798	0.15216	WP_011244382.1	ribosome maturation factor RimP
gene-H6G84_RS02855	1.94754	8.8363e-24	1.17773e-22	WP_011378280.1	transcription termination factor NusA
gene-H6G84_RS02860	1.85836	6.78641e-32	1.69914e-30	WP_011244384.1	YlxR family protein
gene-H6G84_RS02865	0.835594	8.50172e-07	2.42041e-06	WP_011378279.1	translation initiation factor IF-2
gene-H6G84_RS02870	0.934293	1.48092e-10	6.46155e-10	WP_011244386.1	low-complexity tail membrane protein
gene-H6G84_RS02880	-1.4065	9.78872e-07	2.76916e-06	NA	NA
gene-H6G84_RS02885	0.0978772	0.519427	0.571711	WP_011244388.1	YggT family protein
gene-H6G84_RS02890	-0.729424	2.04792e-07	6.34262e-07	WP_011244389.1	photosystem II reaction center X protein
gene-H6G84_RS02895	0.222388	0.180225	0.224256	WP_011378278.1	Ycf66 family protein
gene-H6G84_RS02900	0.205246	0.199858	0.246851	WP_242021681.1	biopolymer transporter Tol
gene-H6G84_RS02905	0.950749	4.4185e-09	1.64863e-08	WP_011244392.1	PD40 domain-containing protein
gene-H6G84_RS02910	-0.0584437	0.694432	0.733722	WP_231621391.1	SpoIID/LytB domain-containing protein
gene-H6G84_RS02920	-0.954603	3.37761e-07	1.02708e-06	WP_039755617.1	photosystem II cytochrome c-550
gene-H6G84_RS02925	0.523534	0.000303091	0.000624121	WP_011378275.1	SMC family ATPase
gene-H6G84_RS02930	0.401405	0.0114628	0.0183451	WP_011378274.1	flavin reductase family protein
gene-H6G84_RS02935	-0.666025	6.27363e-06	1.62387e-05	WP_011244398.1	pantetheine-phosphate adenylyltransferase
gene-H6G84_RS02940	-0.56754	5.46321e-05	0.000125094	WP_242021682.1	hypothetical protein
gene-H6G84_RS02945	-0.184934	0.251543	0.302461	WP_011244400.1	anti-sigma factor
gene-H6G84_RS02950	-0.464477	0.00889479	0.0145034	WP_011244401.1	sigma-70 family RNA polymerase sigma factor
gene-H6G84_RS02955	0.291198	0.0969279	0.128232	WP_231621392.1	CHRD domain-containing protein
gene-H6G84_RS02960	-0.76397	7.55883e-07	2.16675e-06	WP_011378272.1	hypothetical protein
gene-H6G84_RS02965	0.94367	7.9676e-05	0.000176992	WP_155813927.1	hypothetical protein
gene-H6G84_RS02970	0.0571918	0.711383	0.748544	WP_011378271.1	septum site-determining protein MinC
gene-H6G84_RS02975	-0.302684	0.049269	0.0693963	WP_011378270.1	transglycosylase domain-containing protein
gene-H6G84_RS02985	-0.832484	0.000514353	0.0010207	WP_231621393.1	GAF domain-containing protein
gene-H6G84_RS02990	3.08401	1.6e-27	2.92e-26	WP_011244409.1	high light inducible protein
gene-H6G84_RS02995	1.33309	4.47337e-19	4.13247e-18	WP_011244410.1	hypothetical protein
gene-H6G84_RS03000	-0.0153392	0.917424	0.928866	WP_011244411.1	bifunctional phosphoribosyl-AMP cyclohydrolase/phosphoribosyl-ATP diphosphatase HisIE
gene-H6G84_RS03005	-0.254004	0.280049	0.332116	WP_011244412.1	acireductone synthase
gene-H6G84_RS03010	-0.082626	0.739399	0.774347	WP_011244413.1	methylthioribulose 1-phosphate dehydratase
gene-H6G84_RS03015	-1.48704	1.3582e-19	1.30417e-18	WP_011244414.1	S-methyl-5-thioribose-1-phosphate isomerase
gene-H6G84_RS03020	-1.69095	2.95e-26	4.901e-25	WP_011244415.1	large conductance mechanosensitive channel protein MscL
gene-H6G84_RS03025	-1.76698	2.31819e-18	2.03621e-17	WP_199290577.1	TMEM165/GDT1 family protein
gene-H6G84_RS03030	-0.965165	2.322e-09	8.95058e-09	WP_011244417.1	cation diffusion facilitator family transporter
gene-H6G84_RS03035	-0.490025	0.00448663	0.00770493	WP_011244418.1	hypothetical protein
gene-H6G84_RS03040	-4.07843	2.71183e-60	4.27352e-58	WP_011378268.1	hypothetical protein
gene-H6G84_RS03045	-0.460079	0.00488847	0.00830978	WP_011378267.1	insulinase family protein
gene-H6G84_RS03050	-0.299256	0.0372729	0.0538588	WP_011244421.1	fructosamine kinase family protein
gene-H6G84_RS03055	-0.122202	0.391768	0.446236	WP_011244422.1	phytoene synthase
gene-H6G84_RS03060	1.40442	4.9042e-16	3.61938e-15	WP_011378266.1	15-cis-phytoene desaturase
gene-H6G84_RS03065	0.572627	0.00137762	0.00256295	WP_011244424.1	NAD(P)H-quinone oxidoreductase subunit M
gene-H6G84_RS03070	0.224303	0.15469	0.19594	WP_011378265.1	hypothetical protein
gene-H6G84_RS03075	-0.209842	0.138917	0.178151	WP_011378264.1	LysR family transcriptional regulator
gene-H6G84_RS03080	0.335386	0.0460214	0.065199	WP_011378263.1	hypothetical protein
gene-H6G84_RS03085	0.0553003	0.749132	0.783649	WP_011244428.1	thioredoxin family protein
gene-H6G84_RS03090	1.08725	5.20818e-08	1.72896e-07	WP_011378262.1	NAD(P)H-quinone oxidoreductase subunit 5
gene-H6G84_RS03095	-2.0015	1.68616e-21	1.85132e-20	WP_011244430.1	photosynthetic/respiratory NAD(P)H-quinone oxidoreductase subunit D1
gene-H6G84_RS03100	-1.1792	2.48872e-09	9.5111e-09	WP_011244431.1	LapA family protein
gene-H6G84_RS03105	-0.853451	3.33888e-05	7.86016e-05	WP_011378261.1	segregation/condensation protein A
gene-H6G84_RS03110	-0.567739	4.64317e-05	0.000107326	WP_011244433.1	NDP-sugar synthase
gene-H6G84_RS03115	0.140927	0.322388	0.375752	WP_011244434.1	tetratricopeptide repeat protein
gene-H6G84_RS03125	-1.39834	7.41038e-16	5.42416e-15	WP_011244436.1	AbrB family transcriptional regulator
gene-H6G84_RS03130	-0.257403	0.10159	0.133674	WP_011378258.1	TIGR03279 family radical SAM protein
gene-H6G84_RS03135	0.309602	0.0471857	0.0667073	WP_011378257.1	undecaprenyl-diphosphate phosphatase
gene-H6G84_RS03140	0.336662	0.108341	0.141514	WP_011244439.1	chlororespiratory reduction protein 7
gene-H6G84_RS03145	-0.661767	6.15822e-06	1.59863e-05	WP_011378256.1	Ppx/GppA family phosphatase
gene-H6G84_RS03150	0.284782	0.0707111	0.0968977	WP_039755627.1	4-hydroxybenzoate solanesyltransferase
gene-H6G84_RS03155	-0.383681	0.0113295	0.018153	WP_199290536.1	LD-carboxypeptidase
gene-H6G84_RS03160	-0.277038	0.344082	0.399218	WP_011244443.1	photosystem II protein Y
gene-H6G84_RS03165	-0.111668	0.553949	0.605232	WP_011244444.1	gamma carbonic anhydrase family protein
gene-H6G84_RS03170	-1.02729	1.92699e-08	6.73065e-08	WP_011378254.1	TIGR02652 family protein
gene-H6G84_RS03175	-0.380256	0.0129519	0.0204829	WP_011378253.1	proline--tRNA ligase
gene-H6G84_RS03180	0.140439	0.376354	0.431246	WP_011244447.1	helix-turn-helix transcriptional regulator
gene-H6G84_RS03185	-0.168785	0.286007	0.338284	WP_231621394.1	cyclic nucleotide-binding domain-containing protein
gene-H6G84_RS03190	-0.209382	0.162291	0.204217	WP_011244449.1	acetyl-CoA carboxylase%2C carboxyltransferase subunit beta
gene-H6G84_RS03195	-0.299921	0.0820141	0.1108	WP_011378252.1	hypothetical protein
gene-H6G84_RS03200	0.737632	2.4265e-07	7.46337e-07	WP_190528513.1	CTP synthase
gene-H6G84_RS03205	0.916567	4.97807e-06	1.30876e-05	WP_011244451.1	6-carboxytetrahydropterin synthase
gene-H6G84_RS03210	-0.821673	4.07024e-06	1.07962e-05	WP_011378250.1	hypothetical protein
gene-H6G84_RS03215	-0.798499	2.02802e-05	4.92126e-05	NA	NA
gene-H6G84_RS03220	-0.813739	6.40879e-06	1.65623e-05	WP_011244453.1	hypothetical protein
gene-H6G84_RS03225	-0.97292	6.39346e-08	2.09646e-07	WP_011244454.1	hypothetical protein
gene-H6G84_RS03230	-0.966403	3.7904e-07	1.14224e-06	WP_011378249.1	DUF3181 family protein
gene-H6G84_RS03235	-0.0608048	0.714635	0.751081	WP_011244456.1	2TM domain-containing protein
gene-H6G84_RS03240	0.676114	1.17618e-06	3.28724e-06	WP_234909972.1	Ig-like domain-containing protein
gene-H6G84_RS03245	-1.36178	1.5745e-11	7.69726e-11	WP_011244458.1	hypothetical protein
gene-H6G84_RS03250	0.480737	0.00116103	0.00219042	WP_011244459.1	excinuclease ABC subunit UvrC
gene-H6G84_RS03255	-0.387633	0.0155341	0.0240833	WP_011244460.1	pyruvate dehydrogenase (acetyl-transferring) E1 component subunit alpha
gene-H6G84_RS03265	0.184466	0.343563	0.398789	WP_011244462.1	peroxiredoxin
gene-H6G84_RS03270	-1.3351	4.70527e-14	2.87795e-13	WP_011378248.1	MnmC family methyltransferase
gene-H6G84_RS03275	-0.359498	0.0915663	0.121922	WP_011244464.1	organoarsenical effux MFS transporter ArsJ
gene-H6G84_RS03280	0.127039	0.693343	0.733017	WP_011378247.1	ArsJ-associated glyceraldehyde-3-phosphate dehydrogenase
gene-H6G84_RS03285	0.878559	3.23604e-05	7.64493e-05	WP_011378246.1	ACR3 family arsenite efflux transporter
gene-H6G84_RS03290	0.953787	4.57736e-10	1.8924e-09	WP_011378245.1	peptide-methionine (S)-S-oxide reductase MsrA
gene-H6G84_RS03295	0.549964	0.000260062	0.000539664	WP_011378244.1	hypothetical protein
gene-H6G84_RS03300	0.987213	1.77811e-11	8.62964e-11	WP_011244469.1	A24 family peptidase
gene-H6G84_RS03305	0.630448	4.01063e-05	9.3349e-05	WP_234909965.1	D-alanyl-D-alanine carboxypeptidase/D-alanyl-D-alanine-endopeptidase
gene-H6G84_RS03315	0.255395	0.0869944	0.116519	WP_011244472.1	DUF4330 domain-containing protein
gene-H6G84_RS03320	0.94094	1.01463e-11	5.09027e-11	WP_011244473.1	serine/threonine protein phosphatase
gene-H6G84_RS03325	1.40263	9.97736e-22	1.12782e-20	WP_011244474.1	DUF1995 family protein
gene-H6G84_RS03330	1.76781	9.53177e-23	1.16601e-21	WP_011244475.1	cysteine desulfurase
gene-H6G84_RS03335	1.24685	6.3701e-13	3.54792e-12	WP_011244476.1	hypothetical protein
gene-H6G84_RS03340	0.599221	6.71714e-05	0.000151348	WP_011244477.1	diaminopimelate epimerase
gene-H6G84_RS03350	1.12466	4.43816e-13	2.49263e-12	WP_011378242.1	M23 family metallopeptidase
gene-H6G84_RS03355	0.855319	9.35478e-09	3.36395e-08	WP_011378241.1	late competence development ComFB family protein
gene-H6G84_RS03360	1.09338	1.32858e-09	5.24194e-09	WP_011244481.1	sigma-70 family RNA polymerase sigma factor
gene-H6G84_RS03365	0.882225	2.32087e-07	7.14668e-07	WP_199290535.1	hypothetical protein
gene-H6G84_RS03370	-0.967236	0.000326803	0.000668835	WP_011244483.1	gamma-glutamylcyclotransferase
gene-H6G84_RS03375	1.10041	2.74201e-11	1.29785e-10	WP_011378240.1	leucine--tRNA ligase
gene-H6G84_RS03380	-0.495539	0.000864303	0.00165864	WP_011244485.1	helix-turn-helix domain-containing protein
gene-H6G84_RS03385	1.15311	4.75573e-14	2.90219e-13	WP_011378239.1	glycosyltransferase family 4 protein
gene-H6G84_RS03390	0.373316	0.01147	0.0183451	WP_190528534.1	EamA family transporter
gene-H6G84_RS03395	0.677663	1.59802e-06	4.39991e-06	WP_011244488.1	signal peptide peptidase SppA
gene-H6G84_RS03405	-1.84453	2.21903e-21	2.40679e-20	WP_011244490.1	hypothetical protein
gene-H6G84_RS03410	-2.57353	1.23185e-47	7.85742e-46	WP_011244491.1	hypothetical protein
gene-H6G84_RS03415	-3.4168	2.55276e-32	6.45175e-31	WP_011244492.1	photosystem I reaction center subunit XII
gene-H6G84_RS03420	-0.130047	0.40052	0.455044	WP_011244493.1	phosphate signaling complex protein PhoU
gene-H6G84_RS03425	0.604955	0.000242457	0.000504303	WP_011378237.1	ribonuclease R
gene-H6G84_RS03430	1.37258	2.98833e-21	3.20229e-20	WP_199290572.1	UbiX family flavin prenyltransferase
gene-H6G84_RS03435	1.49539	1.98113e-23	2.53944e-22	WP_011244496.1	hypothetical protein
gene-H6G84_RS03440	-0.0478001	0.768469	0.801997	WP_011244497.1	DUF2996 domain-containing protein
gene-H6G84_RS03445	0.160616	0.452513	0.506384	WP_011244498.1	magnesium-protoporphyrin IX monomethyl ester (oxidative) cyclase
gene-H6G84_RS03450	-0.719877	5.46286e-06	1.42502e-05	WP_011244499.1	peptidylprolyl isomerase
gene-H6G84_RS03455	0.64131	7.26044e-05	0.000163177	WP_011378236.1	peptidase domain-containing ABC transporter
gene-H6G84_RS03460	0.401459	0.0108018	0.0173594	WP_011244501.1	HlyD family secretion protein
gene-H6G84_RS03465	0.661101	1.21822e-05	3.05583e-05	WP_011244502.1	class I SAM-dependent methyltransferase
gene-H6G84_RS03470	0.441678	0.00664522	0.0110506	WP_011244503.1	glycosyltransferase family 4 protein
gene-H6G84_RS03475	0.428796	0.0100635	0.0162705	WP_011378235.1	glycosyltransferase family 4 protein
gene-H6G84_RS03480	-0.921586	1.06856e-08	3.81183e-08	WP_011244505.1	dCTP deaminase
gene-H6G84_RS03485	-0.0112541	0.946285	0.95412	WP_011378234.1	cupin domain-containing protein
gene-H6G84_RS03490	0.418559	0.018807	0.0287088	WP_011244507.1	3-isopropylmalate dehydratase large subunit
gene-H6G84_RS03495	1.0124	4.69857e-10	1.93654e-09	WP_199290571.1	TIGR04168 family protein
gene-H6G84_RS03500	0.925641	7.97258e-10	3.19261e-09	WP_011244509.1	bifunctional ornithine acetyltransferase/N-acetylglutamate synthase
gene-H6G84_RS03505	-0.344193	0.024641	0.0368378	WP_011244510.1	2OG-Fe(II) oxygenase
gene-H6G84_RS03510	0.199681	0.179987	0.224095	WP_011378232.1	branched-chain amino acid ABC transporter permease
gene-H6G84_RS03515	-0.267205	0.119686	0.15445	WP_011378231.1	ABC transporter ATP-binding protein
gene-H6G84_RS03520	-0.199769	0.239429	0.289323	WP_011244513.1	rhodanese-related sulfurtransferase
gene-H6G84_RS03525	-0.407533	0.0045641	0.00780793	WP_011244514.1	NYN domain-containing protein
gene-H6G84_RS03530	-1.84772	1.14885e-23	1.50135e-22	WP_011244515.1	hypothetical protein
gene-H6G84_RS03535	1.28932	1.31926e-15	9.27634e-15	WP_011244516.1	glycoside hydrolase family 57 protein
gene-H6G84_RS03540	0.545781	0.000797953	0.00154125	WP_011244517.1	methyltransferase domain-containing protein
gene-H6G84_RS03545	1.25825	2.5224e-13	1.45011e-12	WP_011244518.1	glycosyltransferase family 4 protein
gene-H6G84_RS03550	1.0366	1.13073e-11	5.60966e-11	WP_011378230.1	single-stranded-DNA-specific exonuclease RecJ
gene-H6G84_RS03555	0.875741	3.35186e-08	1.1381e-07	WP_011244520.1	HAD-IA family hydrolase
gene-H6G84_RS03560	0.552835	0.000364948	0.000741802	WP_011244521.1	adenylyltransferase/cytidyltransferase family protein
gene-H6G84_RS03565	0.0913972	0.534585	0.586949	WP_011244522.1	GUN4 domain-containing protein
gene-H6G84_RS03570	-0.525818	0.00269814	0.00479331	WP_011244523.1	photosystem II complex extrinsic protein PsbU
gene-H6G84_RS03575	-0.0539662	0.757937	0.792241	WP_011378229.1	L-aspartate oxidase
gene-H6G84_RS03580	-0.072631	0.725513	0.761022	WP_011378228.1	DUF896 domain-containing protein
gene-H6G84_RS03585	0.676934	5.7889e-06	1.50714e-05	WP_242021683.1	AAA family ATPase
gene-H6G84_RS03590	0.198248	0.218278	0.266773	WP_011244526.1	DUF58 domain-containing protein
gene-H6G84_RS03595	0.99727	1.63186e-10	7.07405e-10	WP_011244527.1	DUF3488 and transglutaminase-like domain-containing protein
gene-H6G84_RS03600	0.457403	0.00559828	0.00942843	WP_011244528.1	hypothetical protein
gene-H6G84_RS03605	0.934682	8.36924e-08	2.71115e-07	WP_199290570.1	TldD/PmbA family protein
gene-H6G84_RS03610	0.167867	0.271889	0.323873	WP_011244530.1	tRNA (cytidine(34)-2'-O)-methyltransferase
gene-H6G84_RS03615	1.10237	1.83897e-13	1.06637e-12	WP_011244531.1	response regulator transcription factor
gene-H6G84_RS03620	0.859977	7.60021e-07	2.17532e-06	WP_011244532.1	ATP-binding protein
gene-H6G84_RS03625	0.648979	0.000315764	0.000647727	WP_011244533.1	hypothetical protein
gene-H6G84_RS03630	2.32376	9.14996e-38	3.14266e-36	WP_011244534.1	efflux RND transporter periplasmic adaptor subunit
gene-H6G84_RS03635	1.91347	2.20844e-22	2.60634e-21	WP_011244535.1	efflux RND transporter permease subunit
gene-H6G84_RS03640	2.27527	1.681e-25	2.6337e-24	WP_011244536.1	hypothetical protein
gene-H6G84_RS03645	0.914489	1.425e-05	3.54463e-05	WP_011378226.1	deoxyribodipyrimidine photo-lyase
gene-H6G84_RS03650	-1.48076	4.48438e-14	2.74912e-13	WP_199290569.1	DUF1824 family protein
gene-H6G84_RS03655	-0.753118	8.73195e-07	2.48069e-06	WP_199290568.1	NAD(+) kinase
gene-H6G84_RS03660	-0.294599	0.0784547	0.106582	WP_039755639.1	hypothetical protein
gene-H6G84_RS03665	0.21204	0.172297	0.215492	WP_011378224.1	L-threonylcarbamoyladenylate synthase
gene-H6G84_RS03670	0.602634	2.57652e-05	6.16294e-05	WP_011378223.1	peptide chain release factor N(5)-glutamine methyltransferase
gene-H6G84_RS03675	0.899126	1.1043e-07	3.52612e-07	WP_011244542.1	hypothetical protein
gene-H6G84_RS03680	0.0854629	0.661122	0.703114	WP_231621396.1	ABC transporter substrate-binding protein
gene-H6G84_RS03685	-0.148311	0.312362	0.365742	WP_011244544.1	response regulator transcription factor
gene-H6G84_RS03690	-0.94178	3.10138e-09	1.17853e-08	WP_011244545.1	EAL domain-containing protein
gene-H6G84_RS03695	-2.16786	7.58263e-21	7.9351e-20	WP_011244546.1	heme oxygenase (biliverdin-producing)
gene-H6G84_RS03700	0.0381249	0.836325	0.860413	WP_011378221.1	NAD(P)-dependent oxidoreductase
gene-H6G84_RS03705	-0.342906	0.158783	0.200556	WP_011378220.1	nucleoside deaminase
gene-H6G84_RS03710	0.106548	0.579965	0.629549	WP_011378219.1	cobyrinate a%2Cc-diamide synthase
gene-H6G84_RS03715	-0.0892057	0.580709	0.630101	WP_011378218.1	precorrin-3B C(17)-methyltransferase
gene-H6G84_RS03720	-0.36093	0.0314138	0.0459878	WP_011244551.1	precorrin-2 C(20)-methyltransferase
gene-H6G84_RS03725	-0.622187	0.000981912	0.00187094	WP_011244552.1	precorrin-8X methylmutase
gene-H6G84_RS03730	-2.38762	2.42077e-40	9.53712e-39	WP_011244553.1	precorrin-3B synthase
gene-H6G84_RS03735	-0.0833942	0.662724	0.704538	WP_011244554.1	bifunctional cobalt-precorrin-7 (C(5))-methyltransferase/cobalt-precorrin-6B (C(15))-methyltransferase
gene-H6G84_RS03740	-3.11873	1.89523e-30	4.19613e-29	WP_011244555.1	RNA polymerase sigma factor SigC
gene-H6G84_RS03745	-2.09929	1.69413e-13	9.88795e-13	WP_039755643.1	hypothetical protein
gene-H6G84_RS03750	-0.289688	0.0906482	0.120759	WP_011244556.1	aspartate-semialdehyde dehydrogenase
gene-H6G84_RS03755	0.00128516	0.992812	0.99504	WP_011244557.1	4-hydroxy-tetrahydrodipicolinate synthase
gene-H6G84_RS03760	1.21892	1.31056e-11	6.46592e-11	WP_011378217.1	ribonuclease J
gene-H6G84_RS03765	-3.46956	7.84407e-66	1.75119e-63	WP_011244559.1	hypothetical protein
gene-H6G84_RS03770	-0.521438	0.000372179	0.000753642	WP_011244560.1	preQ(1) synthase
gene-H6G84_RS03775	-0.194663	0.23046	0.279874	WP_011378216.1	DUF362 domain-containing protein
gene-H6G84_RS03780	0.266998	0.156116	0.197653	WP_011378215.1	RNA-guided endonuclease TnpB family protein
gene-H6G84_RS03785	-0.313883	0.0346837	0.0504166	WP_011378214.1	UDP-N-acetylmuramoyl-tripeptide--D-alanyl-D-alanine ligase
gene-H6G84_RS03790	1.63518	7.2358e-18	6.11505e-17	WP_242021684.1	pentapeptide repeat-containing protein
gene-H6G84_RS03795	-0.213153	0.247557	0.298242	WP_011244565.1	hypothetical protein
gene-H6G84_RS03800	-3.98638	6.80961e-55	7.60122e-53	WP_011244566.1	ferredoxin:protochlorophyllide reductase (ATP-dependent) subunit B
gene-H6G84_RS03805	-1.14818	5.51387e-08	1.82592e-07	WP_242021685.1	DUF2605 domain-containing protein
gene-H6G84_RS03810	0.468439	0.00352361	0.00613768	WP_242021686.1	DUF2973 domain-containing protein
gene-H6G84_RS03815	-0.551888	0.000300832	0.000619945	WP_011378211.1	rhomboid family intramembrane serine protease
gene-H6G84_RS03820	-1.75272	9.12433e-23	1.12129e-21	WP_011244570.1	hypothetical protein
gene-H6G84_RS03825	-2.10081	2.49874e-29	5e-28	WP_011244571.1	ParA family protein
gene-H6G84_RS03830	0.576315	0.00053226	0.00105079	WP_011244572.1	CAAD domain-containing protein
gene-H6G84_RS03835	-0.113263	0.517305	0.570078	WP_199290533.1	GuaB3 family IMP dehydrogenase-related protein
gene-H6G84_RS03840	-1.17085	1.0374e-12	5.70675e-12	WP_011244574.1	thioredoxin
gene-H6G84_RS03845	-0.212224	0.136113	0.174723	WP_011244575.1	1-(5-phosphoribosyl)-5-[(5-phosphoribosylamino)methylideneamino]imidazole-4-carboxamide isomerase
gene-H6G84_RS03850	-0.393789	0.00644837	0.0107701	WP_011244576.1	TIGR02450 family Trp-rich protein
gene-H6G84_RS03855	-0.196563	0.204416	0.251784	WP_011378210.1	hypothetical protein
gene-H6G84_RS03860	-0.227941	0.149187	0.189868	WP_011244578.1	NAD-dependent epimerase/dehydratase family protein
gene-H6G84_RS03865	0.929422	5.34288e-09	1.97701e-08	WP_011244579.1	CDP-diacylglycerol--glycerol-3-phosphate 3-phosphatidyltransferase
gene-H6G84_RS03870	-0.328819	0.0292944	0.0431444	WP_011244580.1	CBS domain-containing protein
gene-H6G84_RS03875	-0.550605	0.000248956	0.000517419	WP_011378209.1	HEAT repeat domain-containing protein
gene-H6G84_RS03880	0.965402	1.20093e-07	3.81196e-07	WP_173282536.1	hypothetical protein
gene-H6G84_RS03885	1.01872	1.62114e-07	5.05593e-07	WP_011244583.1	tetratricopeptide repeat protein
gene-H6G84_RS03890	1.01812	1.83633e-08	6.42235e-08	WP_011378207.1	Bax inhibitor-1 family protein
gene-H6G84_RS03895	-0.190506	0.385139	0.44037	WP_231621282.1	dihydrofolate reductase family protein
gene-H6G84_RS03900	1.68202	4.82475e-13	2.69844e-12	WP_011244586.1	hypothetical protein
gene-H6G84_RS03905	-1.39021	6.17548e-19	5.6658e-18	WP_011378206.1	response regulator
gene-H6G84_RS03910	0.194353	0.1731	0.216395	WP_011378205.1	Cache 3/Cache 2 fusion domain-containing protein
gene-H6G84_RS03915	0.491584	0.00123875	0.00232218	WP_234909960.1	response regulator
gene-H6G84_RS03920	0.310818	0.0579416	0.080553	WP_162010031.1	cyclic nucleotide-binding domain-containing protein
gene-H6G84_RS03925	-0.371115	0.0967716	0.128088	WP_011244591.1	molecular chaperone HtpG
gene-H6G84_RS03930	0.30795	0.0383408	0.0553331	WP_152034137.1	hypothetical protein
gene-H6G84_RS03935	-0.360197	0.0271721	0.0402622	WP_011378201.1	PAS domain S-box protein
gene-H6G84_RS03940	0.540773	0.000293687	0.000606622	WP_011378200.1	diflavin flavoprotein
gene-H6G84_RS03945	0.536902	0.00166574	0.00306492	WP_011378199.1	diflavin flavoprotein
gene-H6G84_RS03950	-1.24773	7.26586e-08	2.36803e-07	WP_011378198.1	pantothenate kinase
gene-H6G84_RS03955	0.358072	0.0700047	0.0961757	WP_011244596.1	NUDIX hydrolase
gene-H6G84_RS03960	0.0664768	0.713792	0.750692	WP_011244597.1	thioredoxin-dependent thiol peroxidase
gene-H6G84_RS03965	-0.694734	0.0103835	0.0167272	WP_011244598.1	4'-phosphopantetheinyl transferase superfamily protein
gene-H6G84_RS03970	-1.29006	1.18609e-14	7.71243e-14	WP_011378197.1	hypothetical protein
gene-H6G84_RS03975	0.237155	0.105108	0.137627	WP_011244600.1	transcriptional repressor
gene-H6G84_RS03980	-0.0722298	0.643615	0.688872	WP_011244601.1	DUF3685 domain-containing protein
gene-H6G84_RS03985	2.26567	1.82915e-41	7.65673e-40	WP_011244602.1	alpha/beta fold hydrolase
gene-H6G84_RS03990	1.10583	2.7591e-10	1.16587e-09	WP_011244603.1	Spy/CpxP family protein refolding chaperone
gene-H6G84_RS03995	0.819279	4.63147e-08	1.55141e-07	WP_011378195.1	hydrogenase expression/formation protein HypE
gene-H6G84_RS04000	-1.16341	9.35723e-07	2.6499e-06	WP_234909951.1	hypothetical protein
gene-H6G84_RS04005	-0.0135121	0.939284	0.948847	WP_011378194.1	hypothetical protein
gene-H6G84_RS04010	0.333447	0.0449873	0.0638255	WP_011244607.1	YciI family protein
gene-H6G84_RS04015	0.254373	0.0884682	0.118031	WP_011244608.1	SsrA-binding protein SmpB
gene-H6G84_RS04020	0.429773	0.0185431	0.0283544	WP_011378193.1	LL-diaminopimelate aminotransferase
gene-H6G84_RS04025	-1.17485	4.71922e-07	1.39391e-06	WP_011378192.1	thioredoxin
gene-H6G84_RS04030	-1.59474	7.35469e-17	5.79506e-16	WP_011244611.1	porphobilinogen synthase
gene-H6G84_RS04035	2.56452	4.91907e-34	1.35858e-32	WP_011244612.1	PQQ-dependent sugar dehydrogenase
gene-H6G84_RS04040	-0.754363	3.42906e-05	8.05122e-05	WP_011378191.1	Dam family site-specific DNA-(adenine-N6)-methyltransferase
gene-H6G84_RS04045	-0.0611246	0.69834	0.736267	WP_011244614.1	DnaJ domain-containing protein
gene-H6G84_RS04050	-0.302889	0.0608946	0.0843955	WP_011244615.1	translocation/assembly module TamB
gene-H6G84_RS04055	0.0802247	0.571449	0.621312	WP_011244616.1	SUF system NifU family Fe-S cluster assembly protein
gene-H6G84_RS04060	0.46963	0.000612966	0.0012048	WP_011244617.1	Ycf51 family protein
gene-H6G84_RS04065	0.691381	1.24546e-05	3.1154e-05	WP_011244618.1	DUF4332 domain-containing protein
gene-H6G84_RS04070	-3.03976	2.48375e-46	1.51226e-44	WP_039755650.1	RNA polymerase sigma factor SigF
gene-H6G84_RS04075	1.2652	3.43993e-19	3.211e-18	WP_011244620.1	UPF0182 family protein
gene-H6G84_RS04080	-0.197803	0.307612	0.360997	WP_011244621.1	threonine synthase
gene-H6G84_RS04085	0.608461	0.0103832	0.0167272	WP_011244622.1	MoaD/ThiS family protein
gene-H6G84_RS04090	-0.405153	0.00712359	0.0117585	WP_011244623.1	DNA mismatch repair endonuclease MutL
gene-H6G84_RS04095	1.53905	7.61071e-19	6.91156e-18	WP_011378188.1	DNA repair protein RecN
gene-H6G84_RS04100	2.37383	2.1328e-24	3.02318e-23	WP_011378187.1	AarF/ABC1/UbiB kinase family protein
gene-H6G84_RS04105	-2.50818	4.80098e-45	2.57237e-43	WP_011244626.1	hypothetical protein
gene-H6G84_RS04110	-1.99799	6.40934e-30	1e-28	WP_011378186.1	hypothetical protein
gene-H6G84_RS04115	-0.333027	0.0273638	0.0405238	WP_011244627.1	PhoH family protein
gene-H6G84_RS04125	-0.215566	0.178464	0.222478	WP_011378185.1	KH domain-containing protein
gene-H6G84_RS04130	-0.315028	0.0501589	0.0703907	WP_011244630.1	30S ribosomal protein S16
gene-H6G84_RS04135	-0.186723	0.226315	0.27512	WP_039755651.1	signal recognition particle protein
gene-H6G84_RS04140	-0.505115	0.0945484	0.125332	WP_011378183.1	hypothetical protein
gene-H6G84_RS04145	0.326727	0.0636937	0.0881381	WP_011244633.1	hypothetical protein
gene-H6G84_RS04150	0.296747	0.0991682	0.130937	WP_011378182.1	hypothetical protein
gene-H6G84_RS04155	1.04576	3.84527e-10	1.59713e-09	WP_039755653.1	cytochrome ubiquinol oxidase subunit I
gene-H6G84_RS04160	1.15946	1.34309e-14	8.64938e-14	WP_199290806.1	cytochrome d ubiquinol oxidase subunit II
gene-H6G84_RS04165	0.330849	0.032907	0.0479862	WP_011378179.1	hypothetical protein
gene-H6G84_RS04170	0.755126	0.000183036	0.000385801	WP_126147814.1	MSMEG_0570 family nitrogen starvation response protein
gene-H6G84_RS04175	0.931492	1.19846e-10	5.27205e-10	WP_011244639.1	inositol monophosphatase family protein
gene-H6G84_RS04180	1.10335	8.46919e-12	4.28094e-11	WP_011378178.1	BCD family MFS transporter
gene-H6G84_RS04185	0.900029	2.45679e-08	8.45983e-08	WP_231621284.1	TolC family protein
gene-H6G84_RS04190	0.768746	5.10287e-07	1.49897e-06	WP_011378176.1	alanine dehydrogenase
gene-H6G84_RS04195	0.585565	4.67829e-05	0.000108044	WP_011244643.1	chlorophyll a/b-binding protein
gene-H6G84_RS04200	0.338874	0.0202423	0.0306725	WP_231621400.1	23S rRNA (adenine(2503)-C(2))-methyltransferase RlmN
gene-H6G84_RS04205	-3.35984	1.65021e-49	1.22803e-47	WP_155813930.1	hypothetical protein
gene-H6G84_RS04210	-2.11856	2.11876e-22	2.51157e-21	WP_011244645.1	hypothetical protein
gene-H6G84_RS04215	0.0754572	0.653471	0.697748	WP_039755658.1	Na+:solute symporter
gene-H6G84_RS04220	-0.0674147	0.686032	0.726434	WP_011244647.1	hypothetical protein
gene-H6G84_RS04225	-0.131016	0.416633	0.471351	WP_199290561.1	GNAT family N-acetyltransferase
gene-H6G84_RS04230	-0.66731	1.02745e-05	2.59917e-05	WP_011244649.1	HEAT repeat domain-containing protein
gene-H6G84_RS04235	0.344479	0.0207244	0.0313499	WP_011244650.1	DUF2997 domain-containing protein
gene-H6G84_RS04240	0.528643	0.000457123	0.000913905	WP_011378170.1	DUF1257 domain-containing protein
gene-H6G84_RS04245	0.331464	0.0213055	0.0321563	WP_011244652.1	ferredoxin
gene-H6G84_RS04250	0.294074	0.0499346	0.0701494	WP_234909959.1	class I SAM-dependent methyltransferase
gene-H6G84_RS04255	0.26429	0.0580365	0.080643	WP_011244654.1	aldo/keto reductase
gene-H6G84_RS04260	0.585476	0.000895518	0.00171732	WP_011378168.1	circadian expression RNA polymerase sigma factor SigA2
gene-H6G84_RS04265	-0.131691	0.407454	0.461552	WP_011378167.1	HPP family protein
gene-H6G84_RS04275	0.261159	0.116262	0.150322	WP_011244658.1	NAD(P)H-quinone oxidoreductase subunit H
gene-H6G84_RS04285	0.180989	0.202418	0.249667	WP_011244660.1	UDP-N-acetylmuramate--L-alanine ligase
gene-H6G84_RS04290	0.581131	0.000734502	0.00142693	WP_199290558.1	UDP-N-acetylmuramate dehydrogenase
gene-H6G84_RS04295	1.51275	1.67495e-18	1.48092e-17	WP_011378165.1	heavy metal-responsive transcriptional regulator
gene-H6G84_RS04300	1.38829	3.3089e-17	2.68623e-16	WP_011244663.1	SufS family cysteine desulfurase
gene-H6G84_RS04305	1.32409	1.42157e-15	9.94357e-15	WP_011378164.1	Fe-S cluster assembly protein SufD
gene-H6G84_RS04310	1.11773	6.54102e-12	3.35055e-11	WP_199290557.1	Fe-S cluster assembly ATPase SufC
gene-H6G84_RS04315	0.493294	0.0095822	0.0155674	WP_011244666.1	Fe-S cluster assembly protein SufB
gene-H6G84_RS04320	0.590511	0.00532715	0.00902113	WP_011244667.1	ferredoxin--nitrite reductase
gene-H6G84_RS04325	-0.0306697	0.852927	0.87447	WP_011244668.1	iron-sulfur cluster biosynthesis transcriptional regulator SufR
gene-H6G84_RS04330	0.109421	0.492088	0.546202	WP_011244669.1	hypothetical protein
gene-H6G84_RS04335	-0.0354305	0.856277	0.876898	WP_011244670.1	phosphoribosyltransferase
gene-H6G84_RS04340	-0.503283	0.00207253	0.00376427	WP_011244671.1	thioredoxin family protein
gene-H6G84_RS04345	-0.939729	4.57814e-07	1.35974e-06	WP_011378162.1	sensor histidine kinase
gene-H6G84_RS04350	-0.979349	6.20934e-06	1.60878e-05	WP_011378161.1	hypothetical protein
gene-H6G84_RS04355	-0.238117	0.213203	0.261405	WP_011378160.1	biotin transporter BioY
gene-H6G84_RS04360	-1.03969	5.58034e-09	2.05919e-08	WP_231621401.1	signal peptidase II
gene-H6G84_RS04365	-0.183963	0.257279	0.308594	WP_011244676.1	PLP-dependent aminotransferase family protein
gene-H6G84_RS04370	-3.69835	1.52867e-41	6.50048e-40	WP_011244677.1	hypothetical protein
gene-H6G84_RS04375	0.889654	2.55513e-09	9.75097e-09	WP_011378159.1	NAD(P)/FAD-dependent oxidoreductase
gene-H6G84_RS04380	-1.5082	3.09203e-19	2.89634e-18	WP_011244679.1	sulfate ABC transporter substrate-binding protein
gene-H6G84_RS04385	1.4124	8.79003e-23	1.08518e-21	WP_011244680.1	HEAT repeat domain-containing protein
gene-H6G84_RS04390	3.16136	2.3253e-24	3.26151e-23	WP_039755663.1	hypothetical protein
gene-H6G84_RS04395	-0.835903	6.41101e-06	1.65623e-05	WP_199290556.1	hypothetical protein
gene-H6G84_RS04400	-0.425443	0.00440791	0.00758432	WP_011378158.1	NADP-dependent isocitrate dehydrogenase
gene-H6G84_RS04405	-1.50139	1.49881e-19	1.42894e-18	WP_011378157.1	FAD-binding oxidoreductase
gene-H6G84_RS04415	-0.839865	2.97952e-07	9.10163e-07	WP_011378155.1	EAL domain-containing protein
gene-H6G84_RS04420	-0.425424	0.00710331	0.0117323	WP_011244686.1	uracil phosphoribosyltransferase
gene-H6G84_RS04425	1.13358	5.4618e-10	2.22712e-09	WP_011378154.1	alpha/beta fold hydrolase
gene-H6G84_RS04430	1.59803	5.27379e-16	3.87082e-15	WP_011378153.1	fatty acid desaturase family protein
gene-H6G84_RS04435	0.323168	0.0919506	0.122312	WP_011244689.1	DUF1818 family protein
gene-H6G84_RS04440	-0.205904	0.207203	0.254514	WP_199290555.1	hypothetical protein
gene-H6G84_RS04445	-0.500856	0.00179389	0.00328044	WP_011244691.1	DNA-directed RNA polymerase subunit omega
gene-H6G84_RS04450	-1.06458	3.27633e-11	1.52914e-10	WP_011378152.1	GTP-binding protein
gene-H6G84_RS04455	-0.647217	4.06465e-05	9.45242e-05	WP_011378151.1	M3 family metallopeptidase
gene-H6G84_RS04460	-0.6973	0.000624243	0.00122516	WP_234909957.1	hypothetical protein
gene-H6G84_RS04465	-1.51441	8.674e-25	1.26862e-23	WP_011244695.1	DUF3769 domain-containing protein
gene-H6G84_RS04470	-1.58955	5.98877e-08	1.96858e-07	WP_011244696.1	photosystem II reaction center protein I
gene-H6G84_RS04475	-0.0155493	0.943655	0.952185	WP_011244697.1	hypothetical protein
gene-H6G84_RS04480	0.0215067	0.875966	0.893986	WP_011378150.1	alpha-mannosidase
gene-H6G84_RS04485	0.205465	0.272721	0.32472	WP_011378149.1	hypothetical protein
gene-H6G84_RS04490	0.229823	0.168041	0.210957	WP_234909955.1	TIGR04376 family protein
gene-H6G84_RS04495	0.446118	0.0442566	0.0628983	WP_011244700.1	GDP-L-fucose synthase
gene-H6G84_RS04500	1.0764	2.69032e-10	1.14221e-09	WP_011378148.1	MATE family efflux transporter
gene-H6G84_RS04505	-0.448105	0.0570985	0.0794634	WP_011244702.1	helix-turn-helix transcriptional regulator
gene-H6G84_RS04510	-0.190318	0.456573	0.509863	WP_011244703.1	CDGSH iron-sulfur domain-containing protein
gene-H6G84_RS04515	0.870593	8.35044e-09	3.02433e-08	WP_011378147.1	pirin-like bicupin family protein
gene-H6G84_RS04520	-0.537424	0.000675816	0.00132058	WP_011378146.1	CsgG/HfaB family protein
gene-H6G84_RS04525	0.760349	6.86953e-06	1.76617e-05	WP_011378145.1	DNA topoisomerase 4 subunit A
gene-H6G84_RS04530	-0.865825	5.34495e-05	0.00012249	WP_011244707.1	response regulator
gene-H6G84_RS04535	-0.585091	0.0160154	0.0247436	WP_011244708.1	restriction endonuclease
gene-H6G84_RS04540	0.0184792	0.926196	0.936543	WP_011378144.1	YeeE/YedE family protein
gene-H6G84_RS04545	-0.813658	0.000159334	0.000340124	WP_155813991.1	hypothetical protein
gene-H6G84_RS04550	-2.37384	1.45189e-34	4.18237e-33	WP_011244711.1	sulfurtransferase
gene-H6G84_RS04555	0.90074	0.00107398	0.00203766	WP_011244712.1	sulfate ABC transporter permease subunit CysW
gene-H6G84_RS04560	-0.400771	0.109533	0.142793	WP_011378142.1	sulfate ABC transporter permease subunit CysT
gene-H6G84_RS04565	-1.16184	1.31168e-07	4.12926e-07	WP_011244714.1	sulfate ABC transporter substrate-binding protein
gene-H6G84_RS04570	-0.0791357	0.633721	0.680449	WP_011244715.1	sulfate ABC transporter permease subunit CysW
gene-H6G84_RS04575	-0.947864	4.07886e-11	1.88726e-10	WP_011244716.1	Crp/Fnr family transcriptional regulator
gene-H6G84_RS04580	-0.927744	2.84952e-05	6.7917e-05	WP_011378141.1	hypothetical protein
gene-H6G84_RS04585	-2.14998	1.42321e-20	1.47212e-19	WP_011378140.1	sulfate ABC transporter permease subunit CysT
gene-H6G84_RS04590	-3.47854	1.1029e-51	9.84892e-50	WP_011378139.1	sulfate ABC transporter substrate-binding protein
gene-H6G84_RS04600	-0.75906	8.16189e-07	2.32862e-06	WP_011244721.1	photosystem II reaction center protein Psb28
gene-H6G84_RS04605	1.73232	4.36477e-31	9.99421e-30	WP_231621287.1	photosystem II protein PsbQ
gene-H6G84_RS04610	2.03383	1.50073e-34	4.27709e-33	WP_011244723.1	FAD-binding oxidoreductase
gene-H6G84_RS04615	0.787502	2.28723e-06	6.22711e-06	WP_011244724.1	hypothetical protein
gene-H6G84_RS04620	0.278499	0.0870307	0.116519	WP_011244725.1	2TM domain-containing protein
gene-H6G84_RS04625	0.30109	0.0484607	0.0683656	WP_011244726.1	hypothetical protein
gene-H6G84_RS04630	0.361155	0.0126082	0.0200103	WP_011244727.1	cofactor assembly of complex C subunit B
gene-H6G84_RS04635	-0.760366	1.62388e-07	5.05858e-07	WP_011244728.1	D-alanyl-D-alanine carboxypeptidase family protein
gene-H6G84_RS04640	0.0721689	0.718216	0.754549	WP_190528538.1	K(+)-transporting ATPase subunit C
gene-H6G84_RS04645	0.321099	0.226463	0.275145	WP_011378136.1	potassium-transporting ATPase subunit F
gene-H6G84_RS04650	0.428566	0.00789583	0.0129614	WP_011244730.1	potassium-transporting ATPase subunit KdpB
gene-H6G84_RS04655	-0.50068	0.0178543	0.0274107	WP_196794074.1	potassium-transporting ATPase subunit KdpA
gene-H6G84_RS04660	-0.575946	0.000518277	0.00102773	WP_011244732.1	UDP-N-acetylmuramoyl-L-alanine--D-glutamate ligase
gene-H6G84_RS04665	-0.218299	0.187011	0.232053	WP_011244733.1	neutral zinc metallopeptidase
gene-H6G84_RS04670	0.815839	7.54731e-08	2.45677e-07	WP_011378135.1	Gfo/Idh/MocA family oxidoreductase
gene-H6G84_RS04675	0.241407	0.225019	0.274136	WP_011378134.1	hypothetical protein
gene-H6G84_RS04680	-0.816122	0.000627956	0.00123065	WP_155813933.1	hypothetical protein
gene-H6G84_RS04685	-0.13463	0.345661	0.400357	WP_011244736.1	cysteine--tRNA ligase
gene-H6G84_RS04690	-1.43632	7.28104e-07	2.09291e-06	WP_011244737.1	hypothetical protein
gene-H6G84_RS04695	0.326208	0.0812592	0.109835	WP_011378132.1	ion transporter
gene-H6G84_RS04700	0.370989	0.0193327	0.0294275	WP_011244739.1	NAD(P)H-dependent oxidoreductase
gene-H6G84_RS04705	0.762409	0.000147536	0.000316202	WP_011378131.1	DUF2214 family protein
gene-H6G84_RS04710	-2.08291	2.3747e-24	3.30567e-23	WP_011378130.1	hypothetical protein
gene-H6G84_RS04715	-5.27242	2.55694e-50	2.14063e-48	WP_011244741.1	catalase/peroxidase HPI
gene-H6G84_RS04720	-4.63132	8.04474e-23	9.97771e-22	WP_011378129.1	hypothetical protein
gene-H6G84_RS04725	-2.89061	4.83823e-11	2.22326e-10	WP_011244742.1	hypothetical protein
gene-H6G84_RS04730	-1.55962	1.07654e-13	6.38067e-13	WP_011378128.1	glycerol dehydrogenase
gene-H6G84_RS04735	0.743397	2.7767e-07	8.50145e-07	WP_011378127.1	B12-binding domain-containing radical SAM protein
gene-H6G84_RS04740	0.803237	5.58723e-08	1.84792e-07	WP_011378126.1	WecB/TagA/CpsF family glycosyltransferase
gene-H6G84_RS04745	0.18069	0.195968	0.242158	WP_011378125.1	glycoside hydrolase family 15 protein
gene-H6G84_RS04750	1.02695	4.98535e-11	2.28694e-10	WP_011244747.1	rubredoxin
gene-H6G84_RS04755	1.07048	1.74347e-14	1.11474e-13	WP_011244748.1	transcriptional repressor
gene-H6G84_RS04760	-1.19426	2.38516e-13	1.37416e-12	WP_011378124.1	alpha/beta hydrolase
gene-H6G84_RS04765	-2.14592	7.58329e-34	2.07302e-32	WP_011244750.1	hypothetical protein
gene-H6G84_RS04770	0.211557	0.140702	0.18001	WP_011244751.1	ribonuclease III
gene-H6G84_RS04775	-0.0716864	0.729401	0.764202	NA	NA
gene-H6G84_RS04780	-0.174655	0.231411	0.280892	WP_011378123.1	hypothetical protein
gene-H6G84_RS04785	-0.315345	0.0377517	0.0545212	WP_011244753.1	diguanylate cyclase
gene-H6G84_RS04790	1.84026	1.56003e-32	4.01857e-31	WP_011244754.1	TIGR00341 family protein
gene-H6G84_RS04795	0.395473	0.0250342	0.0373468	WP_011378122.1	hypothetical protein
gene-H6G84_RS04800	0.58587	0.000720365	0.0014015	WP_011378121.1	NYN domain-containing protein
gene-H6G84_RS04805	-0.166193	0.298923	0.352006	WP_199290529.1	energy-coupling factor ABC transporter ATP-binding protein
gene-H6G84_RS04810	0.712626	5.98532e-06	1.55677e-05	WP_011378120.1	hypothetical protein
gene-H6G84_RS04820	0.178431	0.390967	0.445513	WP_011377633.1	metallophosphoesterase
gene-H6G84_RS04825	1.67732	9.13588e-19	8.26858e-18	WP_011377632.1	trypsin-like peptidase domain-containing protein
gene-H6G84_RS04830	0.715655	7.37751e-06	1.88952e-05	WP_231621405.1	ribose-5-phosphate isomerase RpiA
gene-H6G84_RS04835	-0.194059	0.159073	0.200827	WP_234910052.1	magnesium chelatase ATPase subunit I
gene-H6G84_RS04840	-0.396501	0.0541749	0.0756303	WP_011243253.1	alpha/beta fold hydrolase
gene-H6G84_RS04845	-0.654512	9.81949e-05	0.000216336	WP_011243254.1	hypothetical protein
gene-H6G84_RS04850	-0.0926329	0.514807	0.567793	WP_011377631.1	penicillin-binding protein 2
gene-H6G84_RS04855	-0.292461	0.0368486	0.053332	WP_011243256.1	glycosyltransferase
gene-H6G84_RS04860	-0.260925	0.0945127	0.125332	WP_199290774.1	NAD-dependent epimerase/dehydratase family protein
gene-H6G84_RS04865	-1.12333	3.4425e-14	2.1299e-13	WP_011243258.1	ssl1498 family light-harvesting-like protein
gene-H6G84_RS04870	-0.574184	0.000414533	0.000834988	WP_039755858.1	thiazole synthase
gene-H6G84_RS04875	0.73591	6.03647e-07	1.7578e-06	WP_231621344.1	hypothetical protein
gene-H6G84_RS04880	-0.709097	0.00023796	0.000496106	WP_011243261.1	DUF3598 family protein
gene-H6G84_RS04885	-1.82718	1.3341e-16	1.01825e-15	WP_011377629.1	hypothetical protein
gene-H6G84_RS04890	-2.95509	3.97056e-14	2.44532e-13	NA	NA
gene-H6G84_RS04895	-2.05693	3.2e-26	5.293e-25	WP_011377628.1	VOC family protein
gene-H6G84_RS04900	-1.06643	2.99122e-08	1.01823e-07	WP_011243263.1	MFS transporter
gene-H6G84_RS04905	0.626028	7.48774e-06	1.91438e-05	WP_199290775.1	trans-splicing intein-formed DNA polymerase III subunit alpha C-terminal partner DnaE-C
gene-H6G84_RS04910	-1.78122	3.5e-27	6.28e-26	WP_011243265.1	RpoD/SigA family RNA polymerase sigma factor
gene-H6G84_RS04915	-1.08047	6.20764e-12	3.19813e-11	WP_199290776.1	cytosine deaminase
gene-H6G84_RS04920	0.446098	0.00228011	0.00411065	WP_011377626.1	FAD-binding oxidoreductase
gene-H6G84_RS04925	-0.73882	1.65569e-05	4.08434e-05	WP_199290777.1	HAD-IIB family hydrolase
gene-H6G84_RS04935	0.291862	0.0605842	0.0840523	WP_011243270.1	DevA family ABC transporter ATP-binding protein
gene-H6G84_RS04940	0.664526	0.000117798	0.000256362	WP_011243271.1	excinuclease ABC subunit UvrB
gene-H6G84_RS04945	1.17667	8.18927e-12	4.14727e-11	WP_011243272.1	DUF3531 family protein
gene-H6G84_RS04950	1.22075	5.34767e-17	4.27654e-16	WP_011377624.1	tetratricopeptide repeat protein
gene-H6G84_RS04955	0.378661	0.0142986	0.0223358	WP_011377623.1	energy-coupling factor ABC transporter ATP-binding protein
gene-H6G84_RS04960	1.4782	6.303e-24	8.44284e-23	WP_011243275.1	Hsp33 family molecular chaperone HslO
gene-H6G84_RS04965	0.503279	0.00057375	0.00113103	WP_011243276.1	CPP1-like family protein
gene-H6G84_RS04970	-0.614482	0.00175096	0.0032063	WP_011377622.1	hypothetical protein
gene-H6G84_RS04975	-1.72765	4.068e-25	6.1569e-24	WP_011243277.1	response regulator transcription factor
gene-H6G84_RS04980	-1.11321	3.81014e-06	1.01465e-05	WP_011243278.1	M48 family metallopeptidase
gene-H6G84_RS04985	-1.16524	8.41789e-16	6.07858e-15	WP_011243279.1	redox-regulated ATPase YchF
gene-H6G84_RS04990	0.0828309	0.593359	0.641489	WP_011377621.1	efflux RND transporter periplasmic adaptor subunit
gene-H6G84_RS04995	-0.115092	0.429228	0.483331	WP_011243281.1	UDP-N-acetylglucosamine 2-epimerase (non-hydrolyzing)
gene-H6G84_RS05000	-2.05088	1.2588e-24	1.82282e-23	WP_011377620.1	hypothetical protein
gene-H6G84_RS05005	0.0895396	0.566079	0.616725	WP_011377619.1	DUF6464 family protein
gene-H6G84_RS05010	0.445445	0.00754646	0.0124107	WP_011377618.1	TerC family protein
gene-H6G84_RS05015	0.470762	0.00115852	0.00218725	WP_011243285.1	hypothetical protein
gene-H6G84_RS05020	0.671659	0.00645249	0.0107702	WP_011243286.1	hypothetical protein
gene-H6G84_RS05025	-0.357291	0.0137778	0.0215852	WP_011243287.1	cation:proton antiporter
gene-H6G84_RS05030	0.416717	0.0282784	0.0417399	WP_011243288.1	hypothetical protein
gene-H6G84_RS05035	0.654614	0.0027117	0.00480784	WP_011377617.1	YciI family protein
gene-H6G84_RS05040	0.227846	0.257583	0.308754	WP_011377616.1	NAD(P)H-dependent oxidoreductase
gene-H6G84_RS05045	1.13791	2.16715e-15	1.5002e-14	WP_011377615.1	lipoyl synthase
gene-H6G84_RS05055	0.717134	7.48221e-05	0.00016802	WP_011243292.1	hypothetical protein
gene-H6G84_RS05060	0.660605	0.00252266	0.00450547	WP_231621346.1	PIN domain-containing protein
gene-H6G84_RS05065	0.209204	0.287616	0.340037	WP_011243294.1	CPBP family glutamic-type intramembrane protease
gene-H6G84_RS05070	0.796989	2.11294e-05	5.10882e-05	WP_011243295.1	transketolase
gene-H6G84_RS05075	1.02606	5.02461e-09	1.86698e-08	WP_011243296.1	beta-ketoacyl-ACP synthase II
gene-H6G84_RS05080	-0.225447	0.189675	0.234924	WP_011243297.1	acyl carrier protein
gene-H6G84_RS05085	-1.22259	1.56599e-12	8.45823e-12	WP_011243298.1	photosystem I iron-sulfur center protein PsaC
gene-H6G84_RS05090	0.660223	1.11061e-05	2.80163e-05	WP_011243299.1	glutamine--fructose-6-phosphate transaminase (isomerizing)
gene-H6G84_RS05095	1.3264	1.42772e-13	8.40631e-13	WP_011243300.1	DUF433 domain-containing protein
gene-H6G84_RS05100	0.87925	5.0523e-06	1.32697e-05	WP_011243301.1	DUF5615 family PIN-like protein
gene-H6G84_RS05105	0.401724	0.0124363	0.0197666	WP_199290779.1	tetratricopeptide repeat protein
gene-H6G84_RS05110	1.5729	1.46618e-22	1.76932e-21	WP_011377613.1	tRNA epoxyqueuosine(34) reductase QueG
gene-H6G84_RS05115	1.68279	4.13769e-33	1.09751e-31	WP_070105207.1	6-phosphogluconolactonase
gene-H6G84_RS05120	-0.0986308	0.560689	0.611466	WP_011377612.1	lipopolysaccharide biosynthesis proteins LPS
gene-H6G84_RS05125	-0.501586	0.00166201	0.00306015	WP_011377611.1	hypothetical protein
gene-H6G84_RS05130	0.318279	0.236516	0.28619	WP_011377610.1	sugar ABC transporter permease
gene-H6G84_RS05135	-1.29656	5.4735e-19	5.03901e-18	WP_011243308.1	3-dehydroquinate synthase
gene-H6G84_RS05140	-0.168736	0.307636	0.360997	WP_011377609.1	ester cyclase
gene-H6G84_RS05145	-0.541899	0.000242329	0.000504303	WP_199290781.1	MAPEG family protein
gene-H6G84_RS05150	-2.8512	2.08665e-54	2.07042e-52	WP_155813895.1	hypothetical protein
gene-H6G84_RS05155	0.0797877	0.685872	0.726434	WP_011243311.1	pentapeptide repeat-containing protein
gene-H6G84_RS05160	-0.458117	0.0111712	0.0179315	WP_011243312.1	hypothetical protein
gene-H6G84_RS05165	0.343013	0.0410166	0.058716	WP_011377607.1	hypothetical protein
gene-H6G84_RS05170	0.180921	0.304166	0.357238	WP_011243314.1	AI-2E family transporter
gene-H6G84_RS05175	0.435969	0.00245686	0.00439674	WP_011243315.1	single-stranded-DNA-specific exonuclease RecJ
gene-H6G84_RS05180	-0.275954	0.114497	0.148613	WP_011243316.1	S41 family peptidase
gene-H6G84_RS05185	-0.171712	0.282723	0.334843	WP_011377606.1	DUF309 domain-containing protein
gene-H6G84_RS05190	0.174775	0.368971	0.42351	WP_011377605.1	hypothetical protein
gene-H6G84_RS05195	-0.0947458	0.561691	0.612193	WP_011377604.1	LPS export ABC transporter ATP-binding protein
gene-H6G84_RS05200	0.134468	0.389619	0.444355	WP_231621348.1	LptF/LptG family permease
gene-H6G84_RS05205	0.698645	1.14219e-05	2.87858e-05	WP_011243321.1	c-type cytochrome biogenesis protein CcsB
gene-H6G84_RS05210	0.0940196	0.506245	0.559963	WP_011243322.1	HAD-IB family phosphatase
gene-H6G84_RS05215	0.0456833	0.763557	0.797182	WP_011377603.1	hypothetical protein
gene-H6G84_RS05220	0.488101	0.00162533	0.00299674	WP_011243324.1	geranylgeranyl reductase family protein
gene-H6G84_RS05225	0.173676	0.2409	0.29097	WP_199290782.1	ribosome recycling factor
gene-H6G84_RS05230	0.418901	0.0112875	0.0180965	WP_039755415.1	UMP kinase
gene-H6G84_RS05240	0.110155	0.435743	0.489458	WP_011243328.1	glutamyl-tRNA reductase
gene-H6G84_RS05245	0.106037	0.490217	0.544482	WP_011243329.1	TIGR03792 family protein
gene-H6G84_RS05250	0.166793	0.319434	0.373044	WP_011243330.1	GNAT family N-acetyltransferase
gene-H6G84_RS05255	0.666648	8.337e-06	2.1251e-05	WP_011243331.1	SDR family oxidoreductase
gene-H6G84_RS05260	0.0762137	0.63302	0.679977	WP_011243332.1	hypothetical protein
gene-H6G84_RS05265	-0.592376	0.00152944	0.00282772	WP_011377602.1	hydroxyneurosporene-O-methyltransferase
gene-H6G84_RS05270	-1.88928	8.69217e-18	7.29979e-17	WP_011243334.1	mannose-1-phosphate guanyltransferase
gene-H6G84_RS05275	0.804631	2.38174e-06	6.46472e-06	WP_011243335.1	hypothetical protein
gene-H6G84_RS05280	0.582095	4.4575e-05	0.000103212	WP_011243336.1	class I SAM-dependent methyltransferase
gene-H6G84_RS05285	0.420224	0.00434969	0.00749377	WP_011377601.1	DUF2384 domain-containing protein
gene-H6G84_RS05295	-0.8822	2.31134e-08	8.0001e-08	WP_011377600.1	polyphosphate:AMP phosphotransferase
gene-H6G84_RS05300	0.0258447	0.878258	0.895302	WP_234910054.1	bifunctional riboflavin kinase/FAD synthetase
gene-H6G84_RS05305	-1.85596	1.95146e-31	4.62652e-30	WP_011377599.1	hypothetical protein
gene-H6G84_RS05310	-0.202929	0.175826	0.219598	WP_231621349.1	diguanylate cyclase
gene-H6G84_RS05315	1.74329	1.03736e-30	2.33538e-29	WP_011243342.1	aldehyde dehydrogenase family protein
gene-H6G84_RS05320	0.585027	0.000106136	0.000232874	WP_011243343.1	dihydroorotase
gene-H6G84_RS05325	-0.543069	0.000717628	0.0013982	WP_011243344.1	signal peptidase I
gene-H6G84_RS05330	0.439869	0.0148084	0.0230515	WP_011243345.1	dihydroorotase
gene-H6G84_RS05335	0.649419	0.000627535	0.00123065	WP_011377597.1	histidine phosphatase family protein
gene-H6G84_RS05340	0.079805	0.597972	0.645694	WP_231621350.1	CPBP family intramembrane metalloprotease
gene-H6G84_RS05345	0.512753	0.000408976	0.000825658	WP_011243348.1	hypothetical protein
gene-H6G84_RS05350	0.801969	8.83531e-07	2.50739e-06	WP_011243349.1	penicillin-binding protein 2
gene-H6G84_RS05355	-0.965745	1.79677e-11	8.68873e-11	WP_011377595.1	DUF1036 domain-containing protein
gene-H6G84_RS05360	-1.00909	2.52854e-10	1.08037e-09	WP_011377594.1	ATP-binding protein
gene-H6G84_RS05365	0.502069	0.000765713	0.00148219	WP_011377593.1	translation elongation factor 4
gene-H6G84_RS05370	1.20364	9.91904e-15	6.49709e-14	WP_011243353.1	signal peptidase I
gene-H6G84_RS05375	-0.255975	0.101757	0.133827	WP_011243354.1	YggT family protein
gene-H6G84_RS05380	0.530656	0.0217863	0.0327712	WP_011377592.1	ATP-dependent Clp protease adaptor ClpS2
gene-H6G84_RS05385	-0.833496	2.41712e-08	8.34469e-08	WP_011243356.1	cytochrome b6-f complex subunit PetN
gene-H6G84_RS05390	-0.333292	0.0192426	0.0293069	WP_011377590.1	hypothetical protein
gene-H6G84_RS05395	1.3086	5.2423e-12	2.72702e-11	WP_011377589.1	alkene reductase
gene-H6G84_RS05400	0.558514	0.00233909	0.00420848	WP_011243358.1	exodeoxyribonuclease VII small subunit
gene-H6G84_RS05405	-0.408932	0.00665795	0.0110649	WP_234910055.1	carbohydrate ABC transporter permease
gene-H6G84_RS05410	-0.127174	0.464742	0.51812	WP_011377588.1	hypothetical protein
gene-H6G84_RS05415	0.0369963	0.828311	0.854465	WP_011243361.1	2%2C3-bisphosphoglycerate-independent phosphoglycerate mutase
gene-H6G84_RS05420	-0.107863	0.455813	0.509226	WP_011243362.1	preprotein translocase subunit SecG
gene-H6G84_RS05425	-0.167314	0.260539	0.311878	WP_199290772.1	matrixin family metalloprotease
gene-H6G84_RS05430	1.28366	1.47765e-14	9.4931e-14	WP_231621351.1	glycosyltransferase
gene-H6G84_RS05435	0.270322	0.150633	0.191526	WP_011243365.1	DUF4079 domain-containing protein
gene-H6G84_RS05440	0.331255	0.038774	0.0558471	WP_011243366.1	YbaB/EbfC family nucleoid-associated protein
gene-H6G84_RS05445	1.10048	4.63281e-08	1.55141e-07	WP_011377586.1	low molecular weight phosphotyrosine protein phosphatase
gene-H6G84_RS05450	0.28759	0.0965254	0.127826	WP_011243368.1	DUF924 domain-containing protein
gene-H6G84_RS05455	0.0417673	0.807226	0.836903	WP_011243369.1	hypothetical protein
gene-H6G84_RS05460	-0.234747	0.339599	0.39453	WP_011243370.1	GNAT family N-acetyltransferase
gene-H6G84_RS05465	0.994608	2.70644e-12	1.44596e-11	WP_011243371.1	S-(hydroxymethyl)glutathione dehydrogenase/class III alcohol dehydrogenase
gene-H6G84_RS05470	0.807171	3.64873e-07	1.1016e-06	WP_011243372.1	S-formylglutathione hydrolase
gene-H6G84_RS05475	-0.682354	0.000521139	0.00103209	WP_011243373.1	hypothetical protein
gene-H6G84_RS05480	-1.39901	3.2542e-14	2.02744e-13	WP_006195022.1	photosystem II reaction center protein K
gene-H6G84_RS05485	-0.269345	0.116048	0.150118	WP_011377585.1	tRNA guanosine(34) transglycosylase Tgt
gene-H6G84_RS05490	0.773578	0.000570415	0.00112529	WP_011243375.1	adenosylcobinamide-GDP ribazoletransferase
gene-H6G84_RS05495	-0.51227	0.00405894	0.00701542	WP_011377584.1	GAF domain-containing sensor histidine kinase
gene-H6G84_RS05500	-0.889712	4.2588e-07	1.27053e-06	WP_242016352.1	DUF3155 domain-containing protein
gene-H6G84_RS05505	0.447096	0.00307371	0.00541029	WP_231621352.1	esterase
gene-H6G84_RS05510	1.01415	2.95167e-10	1.24528e-09	WP_011243379.1	NifU family protein
gene-H6G84_RS05515	0.429188	0.0137979	0.0216041	WP_199290785.1	serine--tRNA ligase
gene-H6G84_RS05520	1.07276	1.56946e-10	6.81456e-10	WP_011243381.1	RIP metalloprotease RseP
gene-H6G84_RS05525	0.666223	2.39438e-05	5.73751e-05	WP_234910051.1	endonuclease III
gene-H6G84_RS05530	-0.49438	0.00866771	0.0141763	WP_011243383.1	30S ribosomal protein S14
gene-H6G84_RS05535	0.203794	0.188023	0.232985	WP_011243384.1	ABC transporter permease
gene-H6G84_RS05540	0.700931	0.000306926	0.000631067	WP_011243385.1	TrbI/VirB10 family protein
gene-H6G84_RS05545	0.966131	5.78164e-06	1.50671e-05	WP_011243386.1	S-layer homology domain-containing protein
gene-H6G84_RS05550	-1.41294	2.61838e-10	1.11646e-09	WP_011377582.1	ammonium transporter
gene-H6G84_RS05555	0.268618	0.148045	0.188593	WP_049749323.1	5-(carboxyamino)imidazole ribonucleotide mutase
gene-H6G84_RS05560	-0.470373	0.00447015	0.00768155	WP_039755439.1	N-acetylglucosamine-6-phosphate deacetylase
gene-H6G84_RS05565	-0.342183	0.021756	0.032744	WP_011243390.1	magnesium protoporphyrin IX methyltransferase
gene-H6G84_RS05570	1.26001	6.97224e-07	2.0063e-06	WP_011377580.1	hypothetical protein
gene-H6G84_RS05575	1.29455	2.47241e-09	9.4758e-09	WP_011377579.1	glutathione peroxidase
gene-H6G84_RS05585	1.15941	5.36691e-09	1.98317e-08	WP_011243392.1	hypothetical protein
gene-H6G84_RS05590	1.83234	8.75774e-35	2.55022e-33	WP_011243393.1	TIGR03943 family protein
gene-H6G84_RS05595	1.25235	2.37564e-17	1.95226e-16	WP_011243394.1	permease
gene-H6G84_RS05600	-1.96507	2.39393e-09	9.18818e-09	NA	NA
gene-H6G84_RS05605	-3.03195	3.50781e-45	1.91784e-43	WP_011377578.1	hypothetical protein
gene-H6G84_RS05610	1.22079	1.03224e-15	7.37434e-15	WP_011243396.1	M15 family metallopeptidase
gene-H6G84_RS05615	1.01712	5.40715e-12	2.80189e-11	WP_011377577.1	NAD(P)/FAD-dependent oxidoreductase
gene-H6G84_RS05620	0.332467	0.065688	0.0907571	WP_011377576.1	1-deoxy-D-xylulose-5-phosphate synthase
gene-H6G84_RS05625	0.662933	9.09966e-05	0.000200973	WP_011377575.1	hypothetical protein
gene-H6G84_RS05630	0.289934	0.0323311	0.0472017	WP_011243400.1	citramalate synthase
gene-H6G84_RS05635	0.287194	0.0419905	0.059996	WP_011243401.1	heme ABC exporter ATP-binding protein CcmA
gene-H6G84_RS05640	-0.351752	0.0388785	0.0559375	WP_011243402.1	SMC-Scp complex subunit ScpB
gene-H6G84_RS05645	0.258791	0.283682	0.335831	WP_011243403.1	DUF760 domain-containing protein
gene-H6G84_RS05650	0.308214	0.206482	0.253862	WP_011243404.1	photosystem II q(b) protein
gene-H6G84_RS05655	-0.536997	0.0004792	0.000957329	WP_011243405.1	hypothetical protein
gene-H6G84_RS05660	-1.46311	1.10795e-12	6.06994e-12	WP_011243406.1	hypothetical protein
gene-H6G84_RS05665	-1.77209	3.29374e-29	7e-28	WP_011377574.1	MAPEG family protein
gene-H6G84_RS05670	-1.37339	3.97785e-20	3.99126e-19	WP_011377573.1	peptide ligase PGM1-related protein
gene-H6G84_RS05675	-1.11983	4.94594e-12	2.58288e-11	WP_011243409.1	biotin synthase BioB
gene-H6G84_RS05680	0.686304	0.000176316	0.000372517	WP_011243410.1	DUF1257 domain-containing protein
gene-H6G84_RS05685	1.79254	4.273e-25	6.395e-24	WP_011243411.1	AAA family ATPase
gene-H6G84_RS05690	2.05464	1.7e-27	3.09e-26	WP_011377572.1	hypothetical protein
gene-H6G84_RS05695	-2.81018	1.06965e-54	1.14624e-52	WP_011243413.1	pentapeptide repeat-containing protein
gene-H6G84_RS05700	-1.47446	2.36162e-17	1.94671e-16	WP_011377571.1	homocysteine biosynthesis protein
gene-H6G84_RS05705	1.27864	7.91608e-16	5.7472e-15	WP_011243415.1	NAD(P)H-quinone oxidoreductase subunit L
gene-H6G84_RS05710	1.23031	6.97324e-18	5.91181e-17	WP_011243416.1	DUF3007 family protein
gene-H6G84_RS05715	1.00022	2.80842e-11	1.32694e-10	WP_011243417.1	tryptophan synthase subunit alpha
gene-H6G84_RS05720	0.524811	0.0124661	0.0197965	WP_011243418.1	BrnT family toxin
gene-H6G84_RS05725	0.870268	0.000226595	0.000473885	WP_011377569.1	ribbon-helix-helix protein%2C CopG family
gene-H6G84_RS05730	0.983918	1.73678e-06	4.75809e-06	WP_011377568.1	phosphoribosylanthranilate isomerase
gene-H6G84_RS05735	-2.39072	7.68061e-37	2.47908e-35	WP_011243420.1	photosystem I reaction center subunit PsaK
gene-H6G84_RS05740	0.55642	0.000368662	0.000747649	WP_011243421.1	DUF4168 domain-containing protein
gene-H6G84_RS05745	0.650904	3.50076e-05	8.21239e-05	WP_011377567.1	DNA polymerase III subunit delta
gene-H6G84_RS05750	0.313085	0.0388433	0.0559169	WP_155813972.1	peptide chain release factor 2
gene-H6G84_RS05755	0.529239	0.00287137	0.00507414	WP_011243424.1	DUF3285 domain-containing protein
gene-H6G84_RS05760	0.188065	0.294997	0.347688	WP_199290725.1	rRNA maturation RNase YbeY
gene-H6G84_RS05765	-0.756511	1.43935e-05	3.577e-05	WP_231621354.1	diacylglycerol kinase family protein
gene-H6G84_RS05770	-0.223951	0.11557	0.149699	WP_199290724.1	aminodeoxychorismate/anthranilate synthase component II
gene-H6G84_RS05775	0.0378428	0.793454	0.82486	WP_242021694.1	MBL fold metallo-hydrolase
gene-H6G84_RS05780	1.31345	6.52253e-12	3.34748e-11	WP_011243429.1	DUF4079 domain-containing protein
gene-H6G84_RS05785	0.916647	2.97292e-10	1.25227e-09	WP_011377565.1	glycoside hydrolase 100 family protein
gene-H6G84_RS05790	0.64866	7.70284e-05	0.000171823	WP_011377564.1	bifunctional phosphoribosylaminoimidazolecarboxamide formyltransferase/IMP cyclohydrolase
gene-H6G84_RS05795	-1.38916	2.44283e-20	2.47892e-19	WP_011377563.1	hypothetical protein
gene-H6G84_RS05800	-0.782104	2.34458e-06	6.3703e-06	WP_011243433.1	phosphatidate cytidylyltransferase
gene-H6G84_RS05805	-0.839018	0.00016636	0.000353153	WP_011377562.1	DUF2993 domain-containing protein
gene-H6G84_RS05810	0.932589	4.24601e-07	1.26812e-06	WP_011377561.1	MltA domain-containing protein
gene-H6G84_RS05815	-1.29479	2.74662e-10	1.16243e-09	WP_011243436.1	alpha/beta hydrolase
gene-H6G84_RS05820	-0.72329	2.8353e-06	7.62626e-06	WP_011243437.1	chromate efflux transporter
gene-H6G84_RS05825	-0.358924	0.0864692	0.115954	WP_039755448.1	hypothetical protein
gene-H6G84_RS05830	0.156175	0.404563	0.458664	WP_011377559.1	glycosyltransferase family 4 protein
gene-H6G84_RS05835	0.0229717	0.883959	0.899744	WP_011243439.1	tRNA (adenosine(37)-N6)-threonylcarbamoyltransferase complex ATPase subunit type 1 TsaE
gene-H6G84_RS05840	0.24322	0.0995483	0.131374	WP_199290721.1	YvcK family protein
gene-H6G84_RS05845	-1.93023	1.028e-25	1.6393e-24	WP_039755450.1	geranylgeranyl reductase
gene-H6G84_RS05850	-1.13549	1.03487e-06	2.90914e-06	WP_011377558.1	hypothetical protein
gene-H6G84_RS05855	-2.62812	3.0184e-40	1.17193e-38	WP_011377557.1	hypothetical protein
gene-H6G84_RS05860	-1.68678	3.31134e-16	2.47795e-15	WP_011243444.1	TM2 domain-containing protein
gene-H6G84_RS05865	-1.41211	6.44083e-18	5.49522e-17	WP_231621355.1	DUF2752 domain-containing protein
gene-H6G84_RS05870	-1.10865	3.75742e-11	1.74456e-10	WP_039755453.1	hypothetical protein
gene-H6G84_RS05875	0.361608	0.011704	0.0186748	WP_011243446.1	DUF3086 domain-containing protein
gene-H6G84_RS05880	0.39548	0.00426674	0.00736033	WP_011377555.1	DUF3119 family protein
gene-H6G84_RS05885	0.592957	1.82572e-05	4.47084e-05	WP_011243448.1	MlaE family lipid ABC transporter permease subunit
gene-H6G84_RS05890	-0.230926	0.215464	0.263695	WP_011243449.1	hypothetical protein
gene-H6G84_RS05895	-0.699709	2.08467e-05	5.04502e-05	WP_011377554.1	insulinase family protein
gene-H6G84_RS05900	0.96244	1.65e-09	6.45305e-09	WP_242021696.1	insulinase family protein
gene-H6G84_RS05905	0.557069	0.00370142	0.00642235	WP_011377553.1	hypothetical protein
gene-H6G84_RS05910	1.59647	5.08566e-18	4.39499e-17	WP_011377552.1	hypothetical protein
gene-H6G84_RS05915	-0.157183	0.370603	0.425201	WP_011377551.1	hypothetical protein
gene-H6G84_RS05920	-1.15431	4.64328e-07	1.37604e-06	WP_011377550.1	homoserine O-succinyltransferase
gene-H6G84_RS05925	-1.41195	4.47534e-12	2.35549e-11	WP_011243455.1	aminotransferase class V-fold PLP-dependent enzyme
gene-H6G84_RS05930	-1.03182	4.55275e-07	1.3537e-06	WP_011377549.1	FAD-dependent oxidoreductase
gene-H6G84_RS05935	-0.130979	0.486234	0.540731	WP_039755458.1	exodeoxyribonuclease VII large subunit
gene-H6G84_RS05940	-0.317399	0.0864785	0.115954	WP_011377547.1	bile acid:sodium symporter family protein
gene-H6G84_RS05945	0.505753	0.00080402	0.0015485	WP_011243459.1	SulP family inorganic anion transporter
gene-H6G84_RS05950	-1.1009	0.000130443	0.000282502	WP_155813899.1	hypothetical protein
gene-H6G84_RS05955	1.09063	1.61008e-08	5.66808e-08	WP_231621356.1	response regulator
gene-H6G84_RS05960	2.97339	3.0905e-49	2.23769e-47	WP_011243461.1	phycobiliprotein lyase
gene-H6G84_RS05965	0.981107	1.94971e-08	6.80114e-08	WP_011377546.1	hypothetical protein
gene-H6G84_RS05970	0.896675	1.43523e-08	5.07924e-08	WP_011243463.1	DUF3177 family protein
gene-H6G84_RS05975	0.252645	0.169263	0.212292	WP_011243464.1	Calvin cycle protein CP12
gene-H6G84_RS05980	-0.935903	5.43865e-10	2.22445e-09	WP_011243465.1	FIST C-terminal domain-containing protein
gene-H6G84_RS05985	0.77021	3.65145e-07	1.1016e-06	WP_011377545.1	metallophosphoesterase
gene-H6G84_RS05990	0.274492	0.159767	0.201498	WP_011243467.1	tRNA (guanosine(46)-N7)-methyltransferase TrmB
gene-H6G84_RS05995	0.254878	0.103818	0.136205	WP_011243468.1	IctB family putative bicarbonate transporter
gene-H6G84_RS06000	-0.619615	0.000197933	0.000415892	WP_011243469.1	DUF751 family protein
gene-H6G84_RS06005	-0.133393	0.388121	0.442835	WP_011243470.1	30S ribosome-binding factor RbfA
gene-H6G84_RS06010	-0.400444	0.00648094	0.010811	WP_011377544.1	beta-glucosidase
gene-H6G84_RS06015	-3.28405	2.15692e-43	1.07007e-41	WP_155813902.1	hypothetical protein
gene-H6G84_RS06020	0.158778	0.43444	0.488404	WP_011377543.1	bile acid:sodium symporter family protein
gene-H6G84_RS06025	1.54745	2.1e-26	3.566e-25	WP_011243473.1	peptide-methionine (R)-S-oxide reductase MsrB
gene-H6G84_RS06030	-0.836663	2.61401e-07	8.0217e-07	WP_011243474.1	MlaD family protein
gene-H6G84_RS06035	-0.393555	0.0421799	0.0602345	WP_231621357.1	ATP-binding cassette domain-containing protein
gene-H6G84_RS06040	-1.99509	9.87587e-36	3.00653e-34	WP_199290680.1	DUF3611 family protein
gene-H6G84_RS06045	-1.16478	3.9617e-13	2.2344e-12	WP_011243477.1	recombinase RecA
gene-H6G84_RS06050	-0.902046	3.40265e-07	1.03353e-06	WP_011243478.1	hypothetical protein
gene-H6G84_RS06055	0.410158	0.0200117	0.0303747	WP_011243479.1	peptidoglycan editing factor PgeF
gene-H6G84_RS06060	0.0324415	0.831498	0.856433	WP_011243480.1	biotin--[acetyl-CoA-carboxylase] ligase
gene-H6G84_RS06065	1.02457	1.19774e-09	4.73964e-09	WP_242021698.1	M23 family metallopeptidase
gene-H6G84_RS06070	0.000711737	0.996555	0.998418	WP_011377542.1	photosystem II protein Psb27
gene-H6G84_RS06075	-0.311406	0.0934725	0.124028	WP_011377541.1	hypothetical protein
gene-H6G84_RS06080	-0.154596	0.402283	0.456853	WP_011243484.1	hypothetical protein
gene-H6G84_RS06085	-0.0657602	0.706245	0.743722	WP_011243485.1	CPBP family intramembrane metalloprotease
gene-H6G84_RS06090	0.615503	7.02902e-05	0.000158109	WP_011243486.1	DUF3326 domain-containing protein
gene-H6G84_RS06095	0.0521803	0.76193	0.795793	WP_039755467.1	hypothetical protein
gene-H6G84_RS06100	0.218485	0.192854	0.23864	WP_011243487.1	ferredoxin PetF2
gene-H6G84_RS06105	0.339559	0.0692646	0.0952077	WP_011377540.1	F0F1 ATP synthase subunit gamma
gene-H6G84_RS06110	0.440537	0.0404563	0.0579895	WP_011377539.1	F0F1 ATP synthase subunit alpha
gene-H6G84_RS06115	1.08807	1.25048e-07	3.95987e-07	WP_011243490.1	ATP synthase F1 subunit delta
gene-H6G84_RS06120	1.15608	1.86489e-11	9.00185e-11	WP_011377538.1	F0F1 ATP synthase subunit B
gene-H6G84_RS06125	0.788013	1.21626e-05	3.05376e-05	WP_011243492.1	F0F1 ATP synthase subunit B'
gene-H6G84_RS06130	0.113574	0.559339	0.610374	WP_011243493.1	ATP synthase F0 subunit C
gene-H6G84_RS06135	0.145725	0.440625	0.494319	WP_196794062.1	F0F1 ATP synthase subunit A
gene-H6G84_RS06140	0.279008	0.14473	0.184689	WP_231621358.1	ATP synthase subunit I
gene-H6G84_RS06145	-0.437353	0.00908788	0.0147823	WP_011243496.1	methyltransferase domain-containing protein
gene-H6G84_RS06150	-0.0406591	0.837272	0.860726	WP_011243497.1	phycobilisome rod-core linker polypeptide
gene-H6G84_RS06155	-0.944041	6.25471e-07	1.81739e-06	WP_011243498.1	allophycocyanin subunit alpha
gene-H6G84_RS06160	-0.845194	1.9859e-05	4.84538e-05	WP_011243499.1	allophycocyanin subunit beta
gene-H6G84_RS06165	-0.702166	0.00013984	0.000300908	WP_011243500.1	phycobilisome linker polypeptide
gene-H6G84_RS06170	-0.39414	0.00498836	0.00846884	WP_011377535.1	FtsW/RodA/SpoVE family cell cycle protein
gene-H6G84_RS06175	0.649581	7.60316e-05	0.000170172	WP_011243502.1	sulfite exporter TauE/SafE family protein
gene-H6G84_RS06180	0.630517	6.68512e-05	0.000150753	WP_011243503.1	cytochrome c biogenesis protein
gene-H6G84_RS06185	-0.862595	1.41924e-07	4.46262e-07	WP_011243504.1	P-II family nitrogen regulator
gene-H6G84_RS06190	0.107576	0.492173	0.546202	WP_199290714.1	UDP-glucose 4-epimerase GalE
gene-H6G84_RS06195	-0.554219	0.000130868	0.000283196	WP_199290679.1	TlyA family RNA methyltransferase
gene-H6G84_RS06200	-0.809379	1.15218e-07	3.6659e-07	WP_011377534.1	hypothetical protein
gene-H6G84_RS06205	0.0926252	0.550389	0.601834	WP_011377533.1	hypothetical protein
gene-H6G84_RS06210	-0.457729	0.00640658	0.0107069	WP_011243509.1	hypothetical protein
gene-H6G84_RS06215	-0.900519	7.56219e-07	2.16675e-06	WP_011377532.1	adenylosuccinate lyase
gene-H6G84_RS06220	0.478908	0.0139388	0.0217991	WP_231621359.1	succinate dehydrogenase cytochrome b subunit
gene-H6G84_RS06225	0.792339	2.5921e-08	8.8801e-08	WP_011243512.1	pentapeptide repeat-containing protein
gene-H6G84_RS06230	-2.74161	1.65126e-33	4.42373e-32	WP_011377531.1	YraN family protein
gene-H6G84_RS06235	-2.26816	1.74869e-22	2.09141e-21	WP_011243514.1	16S rRNA (adenine(1518)-N(6)/adenine(1519)-N(6))-dimethyltransferase RsmA
gene-H6G84_RS06240	-0.993246	1.6302e-11	7.95504e-11	WP_011243515.1	4-(cytidine 5'-diphospho)-2-C-methyl-D-erythritol kinase
gene-H6G84_RS06245	-0.898125	0.000161509	0.000343672	WP_011377530.1	NAD(P)H-quinone oxidoreductase subunit F
gene-H6G84_RS06250	0.236044	0.104667	0.137184	WP_011243517.1	CO2 hydration protein
gene-H6G84_RS06255	-0.392984	0.00908564	0.0147823	WP_011377529.1	cation:proton antiporter
gene-H6G84_RS06260	-1.37602	7.06082e-19	6.45595e-18	WP_234910028.1	type II toxin-antitoxin system RelE/ParE family toxin
gene-H6G84_RS06265	-1.02317	1.64126e-11	7.99445e-11	WP_011377528.1	addiction module protein
gene-H6G84_RS06270	-0.909918	6.36241e-07	1.84668e-06	WP_011243520.1	Coq4 family protein
gene-H6G84_RS06275	-0.000430078	1	1	WP_011243521.1	potassium channel protein
gene-H6G84_RS06280	-0.480584	0.00255463	0.00455345	WP_011377526.1	phospholipase D-like domain-containing protein
gene-H6G84_RS06285	0.166495	0.252896	0.303816	WP_011377525.1	single-stranded DNA-binding protein
gene-H6G84_RS06290	0.220962	0.10702	0.139993	WP_039755477.1	rod shape-determining protein
gene-H6G84_RS06295	0.601107	3.5544e-05	8.32364e-05	WP_011243525.1	rod shape-determining protein MreC
gene-H6G84_RS06300	-0.0957978	0.65438	0.698141	WP_011243526.1	rod shape-determining protein MreD
gene-H6G84_RS06305	2.04501	1.79754e-21	1.95756e-20	WP_190528554.1	ATP-dependent zinc metalloprotease FtsH3
gene-H6G84_RS06310	0.625249	9.30407e-06	2.36038e-05	WP_011377523.1	caspase family protein
gene-H6G84_RS06315	0.275327	0.0842411	0.113465	WP_242021700.1	sulfate adenylyltransferase
gene-H6G84_RS06320	0.506272	0.0129103	0.0204414	WP_011243530.1	photosystem II manganese-stabilizing polypeptide
gene-H6G84_RS06325	0.343212	0.114748	0.148722	WP_011243531.1	hypothetical protein
gene-H6G84_RS06330	-0.502623	0.00118081	0.00222461	WP_199290712.1	bifunctional phosphopantothenoylcysteine decarboxylase/phosphopantothenate--cysteine ligase CoaBC
gene-H6G84_RS06335	-0.645436	4.71394e-05	0.000108774	WP_011243533.1	DUF2555 domain-containing protein
gene-H6G84_RS06345	0.322512	0.0494227	0.0695396	WP_199290711.1	quinone-dependent dihydroorotate dehydrogenase
gene-H6G84_RS06350	0.382914	0.0187814	0.0286861	WP_011243535.1	preprotein translocase subunit SecA
gene-H6G84_RS06355	0.584079	0.000281851	0.000583072	WP_011243536.1	bifunctional UDP-N-acetylglucosamine diphosphorylase/glucosamine-1-phosphate N-acetyltransferase GlmU
gene-H6G84_RS06360	0.809598	0.00104747	0.00199302	WP_011377520.1	potassium channel family protein
gene-H6G84_RS06365	0.776569	7.54767e-05	0.000169207	WP_011243538.1	DUF1823 family protein
gene-H6G84_RS06370	0.439851	0.00140823	0.00261445	WP_011243539.1	carbon dioxide-concentrating mechanism protein CcmK
gene-H6G84_RS06375	-0.0647491	0.681759	0.723339	WP_011243540.1	carbon dioxide-concentrating mechanism protein CcmK
gene-H6G84_RS06380	0.100673	0.553245	0.60471	WP_242021702.1	tRNA dihydrouridine synthase DusB
gene-H6G84_RS06385	0.717186	2.70972e-05	6.46424e-05	WP_199290709.1	serine hydroxymethyltransferase
gene-H6G84_RS06390	1.80387	1e-28	2e-27	WP_011243544.1	undecaprenyl/decaprenyl-phosphate alpha-N-acetylglucosaminyl 1-phosphate transferase
gene-H6G84_RS06395	1.67778	4.04963e-20	4.04812e-19	WP_011377519.1	competence/damage-inducible protein A
gene-H6G84_RS06400	-1.24009	1.07201e-12	5.88509e-12	WP_011377518.1	NAD(P)H-dependent oxidoreductase subunit E
gene-H6G84_RS06405	-1.35795	2.09081e-08	7.2744e-08	WP_011243547.1	bidirectional hydrogenase complex protein HoxE
gene-H6G84_RS06410	-0.104402	0.51605	0.568929	WP_011243548.1	NAD-dependent DNA ligase LigA
gene-H6G84_RS06415	-1.42356	3.39311e-15	2.32804e-14	WP_011243549.1	FAD-binding protein
gene-H6G84_RS06420	0.0679385	0.694919	0.733815	WP_011243550.1	DUF86 domain-containing protein
gene-H6G84_RS06425	0.703285	0.00248458	0.00444338	WP_011243551.1	nucleotidyltransferase family protein
gene-H6G84_RS06430	-0.6107	0.00323936	0.00567576	WP_011243552.1	dephospho-CoA kinase
gene-H6G84_RS06435	-0.610724	0.000124642	0.000270378	WP_011243553.1	uroporphyrinogen-III synthase
gene-H6G84_RS06440	0.210914	0.169241	0.212292	WP_011243554.1	uroporphyrinogen-III C-methyltransferase
gene-H6G84_RS06445	-0.16373	0.257334	0.308594	WP_011243555.1	glycosyltransferase
gene-H6G84_RS06450	0.0271559	0.86322	0.882996	WP_011377515.1	alpha/beta fold hydrolase
gene-H6G84_RS06455	1.43331	3.10027e-16	2.32651e-15	WP_231621360.1	MEKHLA domain-containing protein
gene-H6G84_RS06460	-3.77037	9.18443e-50	7.03003e-48	WP_242021704.1	16S rRNA (guanine(527)-N(7))-methyltransferase RsmG
gene-H6G84_RS06465	-2.95079	1.96753e-37	6.67216e-36	WP_155813907.1	hypothetical protein
gene-H6G84_RS06470	-0.495418	0.00877986	0.0143335	WP_011377514.1	J domain-containing protein
gene-H6G84_RS06475	0.2232	0.177277	0.221205	WP_011243560.1	DUF3143 domain-containing protein
gene-H6G84_RS06480	-1.03641	3.91849e-12	2.06646e-11	WP_011243561.1	polyprenyl diphosphate synthase
gene-H6G84_RS06485	-0.259577	0.0705132	0.0967254	WP_011243562.1	diadenylate cyclase CdaA
gene-H6G84_RS06490	-0.129222	0.448387	0.502186	WP_011243563.1	diaminopimelate decarboxylase
gene-H6G84_RS06495	-0.599841	0.000442466	0.000886586	WP_234910027.1	ribosomal protein S18-alanine N-acetyltransferase
gene-H6G84_RS06500	0.384441	0.0333393	0.0485412	WP_011377512.1	ATP-dependent Clp protease ATP-binding subunit
gene-H6G84_RS06505	0.654501	0.000156022	0.000333319	WP_011243566.1	hypothetical protein
gene-H6G84_RS06510	1.07499	5.53503e-10	2.25355e-09	WP_011377511.1	VOC family protein
gene-H6G84_RS06515	0.0851417	0.689584	0.729619	WP_011243568.1	TIGR00297 family protein
gene-H6G84_RS06520	0.573559	3.16088e-05	7.49379e-05	WP_039755882.1	amidohydrolase
gene-H6G84_RS06525	-1.10565	2.72845e-11	1.29372e-10	WP_011377509.1	ATP-binding protein
gene-H6G84_RS06530	0.636727	0.000480429	0.000958848	WP_011243571.1	DNA gyrase subunit A
gene-H6G84_RS06535	0.599309	0.00268637	0.00477558	WP_011377508.1	Hsp20/alpha crystallin family protein
gene-H6G84_RS06540	-0.615975	0.0250373	0.0373468	WP_011243573.1	Calvin cycle protein CP12
gene-H6G84_RS06545	0.0560287	0.843881	0.865859	WP_011243574.1	3'-5' exonuclease
gene-H6G84_RS06550	0.193023	0.348312	0.402905	WP_011243575.1	pentapeptide repeat-containing protein
gene-H6G84_RS06555	-0.0577321	0.739662	0.774347	WP_173282562.1	amino acid ABC transporter ATP-binding protein
gene-H6G84_RS06560	0.166376	0.307992	0.361257	WP_011377507.1	amino acid ABC transporter permease
gene-H6G84_RS06565	0.737211	6.41896e-06	1.65668e-05	WP_011377506.1	ABC transporter permease subunit
gene-H6G84_RS06570	0.430891	0.00311216	0.00546362	WP_011243579.1	amino acid ABC transporter substrate-binding protein
gene-H6G84_RS06575	-2.64832	1e-28	1.8e-27	WP_011243580.1	type I glyceraldehyde-3-phosphate dehydrogenase
gene-H6G84_RS06580	-1.55853	2.087e-08	7.27058e-08	WP_011243581.1	glycogen/starch/alpha-glucan phosphorylase
gene-H6G84_RS06585	2.17344	1.45059e-22	1.75843e-21	WP_011243582.1	chlorophyll a/b-binding protein
gene-H6G84_RS06590	-0.0990433	0.513313	0.566378	WP_231621361.1	calcium/sodium antiporter
gene-H6G84_RS06595	-0.254482	0.0713007	0.0975062	WP_011377504.1	23S rRNA (uracil(1939)-C(5))-methyltransferase RlmD
gene-H6G84_RS06600	-1.1169	3.94901e-11	1.83035e-10	WP_011243585.1	allophycocyanin alpha-B chain
gene-H6G84_RS06605	-0.697524	4.52605e-06	1.19697e-05	WP_011243586.1	c-type cytochrome
gene-H6G84_RS06610	1.17657	9.86566e-16	7.06687e-15	WP_011243587.1	sulfite exporter TauE/SafE family protein
gene-H6G84_RS06615	1.49297	2.84852e-21	3.06474e-20	WP_011243588.1	hypothetical protein
gene-H6G84_RS06625	-0.75326	0.000203628	0.000426854	WP_011243590.1	cyclic nucleotide-binding domain-containing protein
gene-H6G84_RS06630	-0.656547	5.87548e-05	0.000133847	WP_011243591.1	alpha/beta fold hydrolase
gene-H6G84_RS06635	-0.572956	0.00158181	0.00292052	WP_011243592.1	hypothetical protein
gene-H6G84_RS06640	-0.124251	0.387305	0.44228	WP_011243593.1	3-phosphoshikimate 1-carboxyvinyltransferase
gene-H6G84_RS06645	0.161825	0.427019	0.481273	WP_234910026.1	GNAT family N-acetyltransferase
gene-H6G84_RS06650	-2.65129	3.44228e-41	1.41875e-39	WP_011243595.1	hypothetical protein
gene-H6G84_RS06655	1.45907	4.8266e-12	2.53042e-11	WP_011377502.1	hypothetical protein
gene-H6G84_RS06660	-0.145746	0.381755	0.436874	WP_011243597.1	DUF3146 family protein
gene-H6G84_RS06665	-0.371774	0.00616223	0.0103243	WP_199290706.1	aminoacyl-tRNA hydrolase
gene-H6G84_RS06670	-0.452796	0.0017649	0.00322962	WP_011243599.1	TatA/E family twin arginine-targeting protein translocase
gene-H6G84_RS06675	-0.134286	0.42651	0.4809	WP_011243600.1	photosystem II reaction center protein PsbH
gene-H6G84_RS06680	-0.0404902	0.808888	0.837978	WP_011243601.1	photosystem II reaction center protein PsbN
gene-H6G84_RS06685	-0.277045	0.10148	0.133594	WP_011377501.1	hypothetical protein
gene-H6G84_RS06690	-0.222596	0.179297	0.223412	WP_011243602.1	SDR family oxidoreductase
gene-H6G84_RS06695	-0.340553	0.0213264	0.0321697	WP_011243603.1	glucokinase
gene-H6G84_RS06700	0.335849	0.0475335	0.0671637	WP_011243604.1	MinD/ParA family protein
gene-H6G84_RS06705	0.0661458	0.658559	0.700945	WP_011243605.1	hypothetical protein
gene-H6G84_RS06710	-0.736628	5.67029e-05	0.000129724	WP_011243606.1	PCP reductase family protein
gene-H6G84_RS06715	-0.114179	0.633987	0.680449	NA	NA
gene-H6G84_RS06720	2.86579	3.84537e-39	1.45095e-37	WP_011377500.1	haloacid dehalogenase-like hydrolase
gene-H6G84_RS06725	0.510768	0.00018152	0.000382906	WP_011377499.1	zinc-dependent alcohol dehydrogenase family protein
gene-H6G84_RS06730	-4.23844	4.18291e-93	5.603e-90	WP_011243609.1	hypothetical protein
gene-H6G84_RS06735	-0.244239	0.0902807	0.120329	WP_039755486.1	AEC family transporter
gene-H6G84_RS06740	-0.745684	0.000319786	0.000655476	WP_231621362.1	hypothetical protein
gene-H6G84_RS06745	-0.0815847	0.556305	0.607558	WP_011377497.1	chorismate synthase
gene-H6G84_RS06750	0.76888	1.18228e-07	3.7572e-07	WP_011377496.1	cobyric acid synthase CobQ
gene-H6G84_RS06755	0.294091	0.0516215	0.0722917	WP_011377495.1	hypothetical protein
gene-H6G84_RS06760	0.22988	0.152356	0.193296	WP_173282566.1	Maf-like protein
gene-H6G84_RS06765	0.545236	0.00148123	0.00274238	WP_234910025.1	tetratricopeptide repeat protein
gene-H6G84_RS06770	1.08968	1.1372e-06	3.18345e-06	WP_011377493.1	hypothetical protein
gene-H6G84_RS06775	-0.0456934	0.836894	0.860667	WP_011243617.1	nicotinate phosphoribosyltransferase
gene-H6G84_RS06780	0.1367	0.65824	0.700884	WP_011377492.1	bifunctional nicotinamide-nucleotide adenylyltransferase/Nudix hydroxylase
gene-H6G84_RS06785	0.375847	0.0450281	0.0638255	WP_011243619.1	DUF3122 domain-containing protein
gene-H6G84_RS06790	0.145453	0.375419	0.430358	WP_011377491.1	bifunctional diaminohydroxyphosphoribosylaminopyrimidine deaminase/5-amino-6-(5-phosphoribosylamino)uracil reductase RibD
gene-H6G84_RS06795	0.264636	0.131066	0.168729	WP_011377490.1	cbb3-type cytochrome c oxidase subunit I
gene-H6G84_RS06800	0.408162	0.0127885	0.0202725	WP_011243622.1	cbb3-type cytochrome c oxidase subunit II
gene-H6G84_RS06805	0.526668	0.000764807	0.0014815	WP_011377489.1	DUF2231 domain-containing protein
gene-H6G84_RS06810	0.45452	0.00438808	0.00755505	WP_011377488.1	DUF2231 domain-containing protein
gene-H6G84_RS06815	0.268032	0.0809882	0.109579	WP_011243625.1	NAD(P)/FAD-dependent oxidoreductase
gene-H6G84_RS06820	2.81656	5.55219e-46	3.3054e-44	WP_011377487.1	folate/biopterin family MFS transporter
gene-H6G84_RS06825	2.54872	1.41545e-36	4.46116e-35	WP_011243627.1	carotenoid oxygenase family protein
gene-H6G84_RS06830	-1.09198	7.61957e-11	3.41351e-10	WP_011243628.1	pentapeptide repeat-containing protein
gene-H6G84_RS06835	-0.828955	9.69179e-09	3.48047e-08	WP_011377486.1	DNA polymerase I
gene-H6G84_RS06840	-2.62417	4.76775e-49	3.36126e-47	WP_011243630.1	hypothetical protein
gene-H6G84_RS06845	-1.75616	2.02216e-19	1.91426e-18	WP_011243631.1	hypothetical protein
gene-H6G84_RS06850	-0.25452	0.113524	0.147636	WP_011243632.1	alanine--glyoxylate aminotransferase family protein
gene-H6G84_RS06855	0.855647	4.07862e-05	9.4767e-05	WP_011243633.1	cobalt-precorrin-5B (C(1))-methyltransferase CbiD
gene-H6G84_RS06860	-0.248048	0.139717	0.179006	WP_173282570.1	glutamine-hydrolyzing GMP synthase
gene-H6G84_RS06865	-0.674216	0.00080794	0.00155494	WP_011243635.1	EAL domain-containing protein
gene-H6G84_RS06870	-0.645421	6.14809e-05	0.000139701	WP_011243636.1	hemolysin family protein
gene-H6G84_RS06875	0.0490546	0.915668	0.92814	WP_011377484.1	hypothetical protein
gene-H6G84_RS06880	0.0509775	0.772459	0.805534	WP_011377483.1	gamma-glutamyltransferase
gene-H6G84_RS06885	0.57176	0.000135276	0.000292025	WP_011243638.1	inorganic phosphate transporter
gene-H6G84_RS06890	-0.24275	0.202357	0.249667	WP_011377482.1	hypothetical protein
gene-H6G84_RS06895	-0.169223	0.599237	0.646799	WP_011377481.1	class I SAM-dependent methyltransferase
gene-H6G84_RS06900	-2.63045	3.65844e-62	6.53398e-60	WP_011243641.1	AAA family ATPase
gene-H6G84_RS06905	-1.09922	2.43474e-11	1.16062e-10	WP_199290704.1	DUF4435 domain-containing protein
gene-H6G84_RS06910	-1.18954	1.72285e-06	4.73385e-06	WP_242021706.1	tRNA-binding protein
gene-H6G84_RS06915	-0.0471674	0.77439	0.807234	WP_039755888.1	ATP-binding cassette domain-containing protein
gene-H6G84_RS06920	0.537607	0.00326421	0.00571556	WP_011377478.1	ABC-2 family transporter protein
gene-H6G84_RS06925	0.171305	0.322454	0.375752	WP_173282528.1	hypothetical protein
gene-H6G84_RS06930	-0.343483	0.15639	0.197907	WP_011377477.1	lipopolysaccharide assembly protein LapA domain-containing protein
gene-H6G84_RS06940	-0.471521	0.0233276	0.0349914	WP_011243648.1	3'(2')%2C5'-bisphosphate nucleotidase CysQ
gene-H6G84_RS06945	-0.314699	0.104824	0.137323	WP_011377476.1	hypothetical protein
gene-H6G84_RS06950	-1.03399	8.58215e-12	4.32986e-11	WP_039755494.1	cysteine synthase A
gene-H6G84_RS06955	-0.815613	1.06656e-06	2.99509e-06	WP_039755496.1	hypothetical protein
gene-H6G84_RS06960	0.871433	3.91314e-07	1.17394e-06	WP_011243650.1	glutamine synthetase III
gene-H6G84_RS06965	-0.971468	1.78611e-11	8.65278e-11	WP_011377474.1	hypothetical protein
gene-H6G84_RS06970	-0.409449	0.0400153	0.0573881	WP_234910024.1	hypothetical protein
gene-H6G84_RS06975	-0.0589479	0.904512	0.91857	NA	NA
gene-H6G84_RS06980	1.40708	7.56932e-19	6.89735e-18	WP_199290702.1	asparaginase
gene-H6G84_RS06985	0.929999	8.91124e-10	3.55256e-09	WP_011243653.1	CGLD27 family protein
gene-H6G84_RS06990	0.373561	0.0167749	0.0258424	WP_011243654.1	ribosome silencing factor
gene-H6G84_RS06995	0.403074	0.0500441	0.0702663	WP_011243655.1	class I SAM-dependent methyltransferase
gene-H6G84_RS07000	0.690817	0.000963706	0.00183887	WP_011243656.1	hypothetical protein
gene-H6G84_RS07005	-1.09675	3.73164e-15	2.53733e-14	WP_011243657.1	phycobiliprotein lyase
gene-H6G84_RS07010	-0.800341	4.74418e-07	1.39974e-06	WP_011243658.1	GTPase Era
gene-H6G84_RS07015	0.23049	0.421878	0.476681	WP_011243659.1	M67 family metallopeptidase
gene-H6G84_RS07020	0.365452	0.0253764	0.0377476	WP_011377472.1	molybdopterin-synthase adenylyltransferase MoeB
gene-H6G84_RS07025	-2.15813	2.11299e-48	1.41517e-46	WP_011243661.1	hypothetical protein
gene-H6G84_RS07030	-0.126007	0.458399	0.511475	WP_011243662.1	alpha-D-glucose phosphate-specific phosphoglucomutase
gene-H6G84_RS07035	-0.471425	0.0531456	0.0743096	WP_011377471.1	hypothetical protein
gene-H6G84_RS07040	-0.424022	0.0143579	0.0224024	WP_011243663.1	PAP/fibrillin family protein
gene-H6G84_RS07045	-0.259255	0.182217	0.226524	WP_199290676.1	DUF3134 domain-containing protein
gene-H6G84_RS07050	0.184437	0.274211	0.326204	WP_199290701.1	phospho-N-acetylmuramoyl-pentapeptide-transferase
gene-H6G84_RS07055	-1.08757	2.29258e-11	1.0948e-10	WP_011377469.1	response regulator
gene-H6G84_RS07060	-0.265725	0.0855345	0.114976	WP_155813908.1	glycosyltransferase
gene-H6G84_RS07065	0.116092	0.587502	0.636183	WP_011377467.1	methylated-DNA--[protein]-cysteine S-methyltransferase
gene-H6G84_RS07070	-0.582553	4.76292e-05	0.000109809	WP_011377466.1	bifunctional aminoglycoside phosphotransferase/ATP-binding protein
gene-H6G84_RS07075	0.0722874	0.696072	0.734453	WP_011243670.1	hypothetical protein
gene-H6G84_RS07080	0.140923	0.354946	0.409871	WP_011377465.1	hypothetical protein
gene-H6G84_RS07085	-0.328086	0.0661485	0.0912992	WP_011243672.1	DUF3082 domain-containing protein
gene-H6G84_RS07090	1.74136	1.6e-27	2.98e-26	WP_011243673.1	ABA4-like family protein
gene-H6G84_RS07095	-1.0843	4.62091e-11	2.12705e-10	WP_011377464.1	alpha-ketoacid dehydrogenase subunit beta
gene-H6G84_RS07100	0.715811	2.08022e-05	5.03879e-05	WP_011377463.1	protein translocase subunit SecD
gene-H6G84_RS07105	0.485153	0.00236207	0.00424696	WP_011377462.1	protein translocase subunit SecF
gene-H6G84_RS07115	-0.8165	5.26729e-06	1.37669e-05	WP_199290700.1	biosynthetic-type acetolactate synthase large subunit
gene-H6G84_RS07120	-0.854639	9.21794e-09	3.3192e-08	WP_011377460.1	M23 family metallopeptidase
gene-H6G84_RS07125	0.335282	0.0312183	0.0457266	WP_011243680.1	ferrochelatase
gene-H6G84_RS07130	0.238115	0.242017	0.292187	WP_011243681.1	site-specific integrase
gene-H6G84_RS07135	0.495167	0.0283469	0.0418179	WP_011243682.1	methyltransferase domain-containing protein
gene-H6G84_RS07140	0.154737	0.273388	0.325369	WP_011377459.1	O-antigen ligase family protein
gene-H6G84_RS07145	-0.823678	4.42844e-08	1.48669e-07	WP_199290675.1	hypothetical protein
gene-H6G84_RS07150	0.0450076	0.76924	0.80249	WP_199290698.1	FAD-dependent oxidoreductase
gene-H6G84_RS07155	0.28034	0.0868794	0.116433	WP_011377456.1	cyclic nucleotide-binding domain-containing protein
gene-H6G84_RS07160	-0.423346	0.00449723	0.00771818	WP_011377455.1	hypothetical protein
gene-H6G84_RS07165	-0.638377	0.000117695	0.000256346	WP_011243687.1	pre-16S rRNA-processing nuclease YqgF
gene-H6G84_RS07170	-0.366443	0.0128049	0.0202865	WP_011243688.1	DUF3084 domain-containing protein
gene-H6G84_RS07175	0.731831	2.6514e-05	6.33075e-05	WP_011243689.1	global nitrogen regulator NtcA
gene-H6G84_RS07180	-0.0873042	0.596938	0.645097	WP_011377454.1	enoyl-ACP reductase FabI
gene-H6G84_RS07185	0.268586	0.062068	0.0859329	WP_011243691.1	imidazoleglycerol-phosphate dehydratase HisB
gene-H6G84_RS07190	0.204347	0.169446	0.212322	WP_011243692.1	methyltransferase domain-containing protein
gene-H6G84_RS07195	-1.04304	3.5708e-06	9.53757e-06	NA	NA
gene-H6G84_RS07200	-2.4963	1.17932e-54	1.21516e-52	WP_234910023.1	EAL domain-containing protein
gene-H6G84_RS07205	-3.53643	6.67561e-12	3.41297e-11	NA	NA
gene-H6G84_RS07210	-0.986602	1.33553e-08	4.73893e-08	WP_011377452.1	lipid-A-disaccharide synthase-related protein
gene-H6G84_RS07215	-0.670738	0.00628867	0.0105164	WP_011377451.1	nucleoside deaminase
gene-H6G84_RS07220	-0.32288	0.348513	0.402963	WP_011243696.1	hypothetical protein
gene-H6G84_RS07225	0.408172	0.0134118	0.0211105	WP_199290697.1	nitrate/nitrite transporter NrtS
gene-H6G84_RS07230	0.458596	0.0053548	0.00905651	WP_011377450.1	Asp-tRNA(Asn)/Glu-tRNA(Gln) amidotransferase subunit GatB
gene-H6G84_RS07235	0.405243	0.0110867	0.0178066	WP_011243699.1	hypothetical protein
gene-H6G84_RS07240	0.473339	0.0020558	0.00373642	WP_011243700.1	carbohydrate kinase
gene-H6G84_RS07245	0.854795	0.000113126	0.000247197	WP_011377449.1	cupin domain-containing protein
gene-H6G84_RS07250	0.252339	0.0744526	0.101557	WP_011243702.1	hypothetical protein
gene-H6G84_RS07255	-0.346329	0.0433791	0.0617495	WP_011243703.1	cytochrome b6-f complex subunit PetL
gene-H6G84_RS07260	0.278612	0.175589	0.219405	WP_199290696.1	deoxyribodipyrimidine photo-lyase%2C 8-HDF type
gene-H6G84_RS07265	-0.128337	0.396838	0.451627	WP_199290695.1	Hsp70 family protein
gene-H6G84_RS07270	0.0160115	0.915173	0.92799	WP_011377446.1	helix-turn-helix transcriptional regulator
gene-H6G84_RS07275	0.107149	0.511359	0.565386	WP_011377445.1	DNA starvation/stationary phase protection protein
gene-H6G84_RS07280	1.35067	7.97124e-12	4.0445e-11	WP_011243708.1	sulfiredoxin
gene-H6G84_RS07285	0.180237	0.322342	0.375752	WP_234910022.1	GTP-binding protein
gene-H6G84_RS07290	0.0381389	0.799922	0.830616	WP_011243710.1	nicotinate-nucleotide adenylyltransferase
gene-H6G84_RS07295	0.923127	3.42201e-09	1.29669e-08	WP_011377443.1	NAD+ synthase
gene-H6G84_RS07300	0.901118	4.38519e-09	1.63848e-08	WP_039755500.1	hypothetical protein
gene-H6G84_RS07305	0.254285	0.190734	0.236125	WP_234701757.1	ankyrin repeat domain-containing protein
gene-H6G84_RS07310	1.10638	1.25978e-12	6.85965e-12	WP_011377441.1	Uma2 family endonuclease
gene-H6G84_RS07315	1.68829	7.27432e-23	9.06415e-22	WP_011377440.1	NAD(P)/FAD-dependent oxidoreductase
gene-H6G84_RS07320	-2.20025	1.17604e-15	8.31293e-15	WP_011377439.1	hypothetical protein
gene-H6G84_RS07330	-0.179214	0.232723	0.282111	WP_011243718.1	pyruvate kinase
gene-H6G84_RS07335	0.404684	0.013343	0.0210271	WP_011377438.1	cobaltochelatase subunit CobN
gene-H6G84_RS07340	-3.08387	2.34275e-58	3.30328e-56	WP_011243720.1	DUF1269 domain-containing protein
gene-H6G84_RS07345	-1.4085	4.12248e-17	3.31656e-16	WP_011243721.1	response regulator transcription factor
gene-H6G84_RS07350	0.19298	0.29318	0.345852	WP_011377436.1	DNA polymerase III subunit delta'
gene-H6G84_RS07355	-0.370656	0.020196	0.0306198	WP_011377435.1	dTMP kinase
gene-H6G84_RS07360	-0.713884	1.73586e-06	4.75809e-06	WP_011243724.1	hypothetical protein
gene-H6G84_RS07365	1.25392	4.94083e-16	3.63639e-15	WP_011243725.1	chorismate lyase
gene-H6G84_RS07370	-0.761345	4.10132e-07	1.22765e-06	WP_011243726.1	GntR family transcriptional regulator
gene-H6G84_RS07375	-0.560171	0.000429168	0.000861875	WP_011243727.1	dienelactone hydrolase family protein
gene-H6G84_RS07380	-1.45602	6.02236e-05	0.00013696	NA	NA
gene-H6G84_RS07385	-5.54742	2.491e-97	6.67338e-94	WP_039755509.1	hypothetical protein
gene-H6G84_RS07390	-0.3493	0.0200269	0.0303806	WP_234910021.1	MBL fold metallo-hydrolase
gene-H6G84_RS07395	0.326186	0.0329222	0.0479862	WP_011377434.1	site-2 protease family protein
gene-H6G84_RS07400	0.372157	0.0134286	0.0211125	WP_011243730.1	glycogen debranching protein GlgX
gene-H6G84_RS07405	0.546121	0.000751077	0.00145701	WP_011377433.1	HAD family phosphatase
gene-H6G84_RS07410	0.969662	7.73864e-10	3.10822e-09	WP_011377432.1	hypothetical protein
gene-H6G84_RS07415	0.284145	0.108747	0.141906	WP_011243733.1	hypothetical protein
gene-H6G84_RS07420	-0.318646	0.0198191	0.0301335	WP_039755891.1	ABC transporter ATP-binding protein/permease
gene-H6G84_RS07425	0.418776	0.0180871	0.0277522	WP_199290692.1	RNA-binding S4 domain-containing protein
gene-H6G84_RS07430	0.521995	0.000381943	0.000772829	WP_011243736.1	ABC transporter permease
gene-H6G84_RS07435	-0.27316	0.103514	0.135893	WP_011243737.1	single-stranded DNA-binding protein
gene-H6G84_RS07440	-0.534906	0.00109828	0.0020823	WP_011243738.1	secondary thiamine-phosphate synthase enzyme YjbQ
gene-H6G84_RS07445	-1.03764	6.1839e-12	3.19204e-11	WP_011243739.1	helix-turn-helix domain-containing protein
gene-H6G84_RS07450	0.522856	0.000480677	0.000958848	WP_011243740.1	transporter substrate-binding domain-containing protein
gene-H6G84_RS07455	0.572418	0.000134278	0.000290106	WP_199290673.1	aminopeptidase P N-terminal domain-containing protein
gene-H6G84_RS07460	0.923132	0.0114678	0.0183451	WP_011377429.1	hypothetical protein
gene-H6G84_RS07465	0.162934	0.270031	0.321946	WP_011243743.1	4-hydroxy-3-methylbut-2-enyl diphosphate reductase
gene-H6G84_RS07470	0.197525	0.182699	0.227017	WP_234910020.1	DUF1997 domain-containing protein
gene-H6G84_RS07475	-1.5858	1.9193e-23	2.47203e-22	WP_011243745.1	DegT/DnrJ/EryC1/StrS family aminotransferase
gene-H6G84_RS07480	-1.07637	2.09372e-07	6.46207e-07	WP_011243746.1	pyridoxamine 5'-phosphate oxidase family protein
gene-H6G84_RS07485	-3.41732	2.16753e-38	7.84704e-37	WP_011377428.1	hypothetical protein
gene-H6G84_RS07490	-0.168153	0.418437	0.473192	WP_011243747.1	ABC transporter ATP-binding protein
gene-H6G84_RS07495	0.109902	0.455156	0.508704	WP_011243748.1	ABC transporter permease subunit
gene-H6G84_RS07500	1.03136	1.85372e-13	1.0726e-12	WP_011243749.1	Gldg family protein
gene-H6G84_RS07505	-2.13289	5e-28	8.6e-27	WP_011243750.1	translation initiation factor IF-3
gene-H6G84_RS07510	-3.20311	2.36421e-45	1.3476e-43	WP_011377426.1	DUF2887 domain-containing protein
gene-H6G84_RS07515	-2.21539	5.3127e-18	4.57644e-17	WP_234910019.1	dual specificity protein phosphatase family protein
gene-H6G84_RS07520	-2.02592	2.50231e-30	1e-28	WP_011243752.1	glucose-1-phosphate cytidylyltransferase
gene-H6G84_RS07525	-1.5926	9.1916e-17	7.13748e-16	WP_011377425.1	CDP-glucose 4%2C6-dehydratase
gene-H6G84_RS07530	-0.545225	0.0059203	0.00994388	WP_011377423.1	hypothetical protein
gene-H6G84_RS07535	-0.351054	0.0668023	0.0921541	WP_011243754.1	dTDP-4-dehydrorhamnose 3%2C5-epimerase
gene-H6G84_RS07540	-0.126277	0.405437	0.459461	WP_011243755.1	class I SAM-dependent methyltransferase
gene-H6G84_RS07545	-0.187764	0.221522	0.270368	WP_011377422.1	DegT/DnrJ/EryC1/StrS aminotransferase family protein
gene-H6G84_RS07550	-0.780416	7.66858e-05	0.000171344	WP_162010026.1	hypothetical protein
gene-H6G84_RS07555	-0.544482	0.000803427	0.00154849	WP_011243757.1	cephalosporin hydroxylase family protein
gene-H6G84_RS07560	-2.63513	2.14941e-37	7.19785e-36	WP_011243758.1	glycosyltransferase
gene-H6G84_RS07565	-1.25856	3.40774e-15	2.32891e-14	WP_011243759.1	methyltransferase domain-containing protein
gene-H6G84_RS07570	-1.25882	1.79351e-14	1.13858e-13	WP_011377420.1	hypothetical protein
gene-H6G84_RS07575	-1.11312	2.07317e-11	9.95345e-11	WP_011243761.1	glycosyltransferase
gene-H6G84_RS07590	-0.0693337	0.655156	0.698156	WP_011377417.1	exostosin family protein
gene-H6G84_RS07595	-1.26001	4.87575e-15	3.24929e-14	WP_011243763.1	class I SAM-dependent methyltransferase
gene-H6G84_RS07600	-0.493947	0.00898694	0.0146448	WP_199290689.1	tetratricopeptide repeat protein
gene-H6G84_RS07605	1.10146	1.41798e-11	6.95745e-11	WP_011377415.1	FAD-dependent oxidoreductase
gene-H6G84_RS07610	-0.0144085	0.985729	0.988436	WP_011243766.1	hypothetical protein
gene-H6G84_RS07615	-0.454166	0.00688343	0.0113999	WP_011243767.1	50S ribosomal protein L28
gene-H6G84_RS07620	0.891816	7.03651e-06	1.80737e-05	WP_011377414.1	transporter
gene-H6G84_RS07625	0.0830552	0.622128	0.669081	WP_011243769.1	dihydroneopterin aldolase
gene-H6G84_RS07630	0.0782861	0.684161	0.725027	WP_011377413.1	NADP-dependent phosphogluconate dehydrogenase
gene-H6G84_RS07635	-0.664804	0.00655816	0.0109289	WP_011377412.1	NUDIX hydrolase
gene-H6G84_RS07640	0.244223	0.431375	0.485365	WP_011377411.1	hypothetical protein
gene-H6G84_RS07645	-2.23665	1.33123e-20	1.38232e-19	WP_011377410.1	hypothetical protein
gene-H6G84_RS07650	-1.23201	3.07385e-05	7.3004e-05	WP_011377409.1	hypothetical protein
gene-H6G84_RS07655	-2.33897	1.55221e-20	1.59324e-19	WP_039755513.1	hypothetical protein
gene-H6G84_RS07660	-0.97653	2.32963e-05	5.59739e-05	WP_011243774.1	nucleotidyltransferase family protein
gene-H6G84_RS07665	-0.859583	0.000132245	0.000285943	WP_231621370.1	DUF86 domain-containing protein
gene-H6G84_RS07670	0.0193904	0.922669	0.933823	WP_011243776.1	adenosylmethionine--8-amino-7-oxononanoate transaminase
gene-H6G84_RS07675	-0.243416	0.148579	0.189184	WP_011243777.1	dethiobiotin synthase
gene-H6G84_RS07680	0.408281	0.0417788	0.0597572	WP_011243778.1	methyltransferase domain-containing protein
gene-H6G84_RS07685	0.420529	0.0383729	0.0553331	WP_011377407.1	alpha/beta hydrolase
gene-H6G84_RS07690	-0.699631	3.88782e-05	9.05693e-05	WP_011243780.1	8-amino-7-oxononanoate synthase
gene-H6G84_RS07695	0.861833	2.8147e-07	8.60796e-07	WP_011243781.1	aldo/keto reductase
gene-H6G84_RS07700	0.35597	0.0183341	0.028067	WP_234910018.1	alpha/beta hydrolase
gene-H6G84_RS07705	-1.27851	6.92445e-09	2.54118e-08	WP_011377405.1	DUF4336 domain-containing protein
gene-H6G84_RS07710	0.0676412	0.722289	0.757936	WP_011243784.1	calcium/proton exchanger
gene-H6G84_RS07715	0.188668	0.226072	0.275044	WP_011377404.1	pentapeptide repeat-containing protein
gene-H6G84_RS07720	-0.175689	0.453996	0.507619	WP_011243786.1	cobalt-precorrin-6A reductase
gene-H6G84_RS07725	0.297836	0.0429008	0.0611336	WP_199290687.1	hypothetical protein
gene-H6G84_RS07730	-0.434226	0.00997039	0.0161491	WP_011377403.1	sulfite reductase%2C ferredoxin dependent
gene-H6G84_RS07735	-0.155453	0.289455	0.34206	WP_011377402.1	glycine--tRNA ligase subunit beta
gene-H6G84_RS07740	-0.190948	0.363553	0.418187	WP_011243790.1	bifunctional 4-hydroxy-2-oxoglutarate aldolase/2-dehydro-3-deoxy-phosphogluconate aldolase
gene-H6G84_RS07745	-1.24168	4.78083e-07	1.409e-06	WP_011243791.1	hypothetical protein
gene-H6G84_RS07750	-1.7676	5.96641e-14	3.60813e-13	WP_199290686.1	hypothetical protein
gene-H6G84_RS07755	-1.71632	4.42439e-15	2.97066e-14	WP_199290685.1	Fe2+-dependent dioxygenase
gene-H6G84_RS07760	-0.741359	5.34368e-05	0.00012249	WP_011243793.1	hypothetical protein
gene-H6G84_RS07765	-0.866977	2.21297e-08	7.66953e-08	WP_011243794.1	hypothetical protein
gene-H6G84_RS07770	-1.04836	8.33545e-09	3.02433e-08	WP_011377401.1	30S ribosomal protein S6
gene-H6G84_RS07775	-1.04837	4.94005e-08	1.64607e-07	WP_011377400.1	hypothetical protein
gene-H6G84_RS07780	-0.847205	6.41713e-09	2.36147e-08	WP_231621371.1	DedA family protein
gene-H6G84_RS07785	-0.650763	1.20402e-05	3.0287e-05	WP_011243798.1	argininosuccinate synthase
gene-H6G84_RS07790	0.699235	1.28244e-05	3.20489e-05	WP_231621372.1	hypothetical protein
gene-H6G84_RS07795	0.909847	8.4376e-08	2.72999e-07	WP_011377398.1	YtxH domain-containing protein
gene-H6G84_RS07800	0.809875	3.31834e-05	7.81867e-05	WP_011243801.1	hypothetical protein
gene-H6G84_RS07805	0.243331	0.152715	0.193622	WP_011377397.1	permease
gene-H6G84_RS07810	1.55735	1.24699e-22	1.5185e-21	WP_011243803.1	amidophosphoribosyltransferase
gene-H6G84_RS07815	0.58188	0.000309007	0.000634839	WP_011243804.1	phosphoribosylformylglycinamidine synthase subunit PurL
gene-H6G84_RS07820	0.450952	0.00168461	0.00309327	WP_199290672.1	RNA metabolism
gene-H6G84_RS07825	-0.216269	0.143089	0.182714	WP_070105208.1	DNA polymerase III subunit beta
gene-H6G84_RS07830	-0.107544	0.525918	0.577906	WP_011243807.1	HAD-IA family hydrolase
gene-H6G84_RS07835	-0.726788	1.37538e-06	3.81433e-06	WP_199290683.1	threonine synthase
gene-H6G84_RS07840	-0.683501	0.000369509	0.000748801	WP_231621373.1	hypothetical protein
gene-H6G84_RS07845	-1.64522	2.45e-26	4.121e-25	WP_011378532.1	uroporphyrinogen-III C-methyltransferase
gene-H6G84_RS07850	-0.187953	0.207743	0.255062	WP_011243811.1	alpha/beta hydrolase
gene-H6G84_RS07855	2.13553	8.055e-25	1.18569e-23	WP_011378531.1	hypothetical protein
gene-H6G84_RS07860	0.314685	0.151556	0.192426	WP_011243813.1	exodeoxyribonuclease III
gene-H6G84_RS07865	0.444318	0.00458019	0.00783046	WP_011378530.1	threonine--tRNA ligase
gene-H6G84_RS07870	-2.26224	2.85434e-53	2.63682e-51	WP_231621374.1	hypothetical protein
gene-H6G84_RS07875	-0.77217	0.000521269	0.00103209	WP_011243816.1	heme-copper oxidase subunit III
gene-H6G84_RS07880	-1.76156	6.77359e-11	3.06011e-10	WP_011243817.1	cytochrome c oxidase subunit I
gene-H6G84_RS07885	-3.1203	1.54638e-39	5.91823e-38	WP_199290682.1	cytochrome c oxidase subunit II
gene-H6G84_RS07890	-2.65437	1.67491e-30	3.73924e-29	WP_011378529.1	COX15/CtaA family protein
gene-H6G84_RS07895	-2.05194	1.72851e-14	1.10782e-13	WP_011243820.1	heme o synthase
gene-H6G84_RS07900	-2.23029	4.193e-14	2.57639e-13	WP_011243821.1	phenylpyruvate tautomerase MIF-related protein
gene-H6G84_RS07905	-1.21899	4.0015e-07	1.19911e-06	WP_011243822.1	hypothetical protein
gene-H6G84_RS07910	0.110469	0.617671	0.665089	WP_011243823.1	CYTH domain-containing protein
gene-H6G84_RS07915	0.28837	0.0481646	0.0679837	WP_011243824.1	Gfo/Idh/MocA family oxidoreductase
gene-H6G84_RS07920	1.38086	2.1843e-19	2.06047e-18	WP_011243825.1	hemolysin family protein
gene-H6G84_RS07925	-0.366842	0.0140501	0.0219605	WP_155813911.1	hypothetical protein
gene-H6G84_RS07930	0.00364179	0.966626	0.972069	NA	NA
gene-H6G84_RS07935	-0.232696	0.142491	0.182038	WP_231621375.1	hypothetical protein
gene-H6G84_RS07940	-0.243884	0.1596	0.201398	WP_039755900.1	orotate phosphoribosyltransferase
gene-H6G84_RS07945	-1.14203	0.000152014	0.000325276	WP_011378524.1	hypothetical protein
gene-H6G84_RS07950	-2.08725	2.19768e-12	1.17752e-11	WP_011243830.1	type II secretion system GspH family protein
gene-H6G84_RS07955	-1.34198	4.50691e-15	3.0185e-14	WP_011243831.1	2-phosphosulfolactate phosphatase family protein
gene-H6G84_RS07960	1.06291	2.70948e-12	1.44596e-11	WP_011243832.1	UbiD family decarboxylase
gene-H6G84_RS07965	1.5136	1.08088e-19	1.05298e-18	WP_011243833.1	DUF3916 domain-containing protein
gene-H6G84_RS07970	-0.831401	0.000502996	0.00100039	WP_011243834.1	DUF202 domain-containing protein
gene-H6G84_RS07975	1.07869	5.93895e-08	1.9546e-07	WP_039755902.1	Rrf2 family transcriptional regulator
gene-H6G84_RS07980	1.46165	3.44203e-16	2.56858e-15	WP_011243836.1	SDR family oxidoreductase
gene-H6G84_RS07985	1.1224	2.04373e-11	9.82973e-11	WP_011243837.1	DUF3386 domain-containing protein
gene-H6G84_RS07990	1.07196	3.1687e-11	1.48668e-10	WP_199290681.1	inositol monophosphatase
gene-H6G84_RS07995	0.823577	1.98771e-05	4.84538e-05	WP_011243839.1	2Fe-2S iron-sulfur cluster-binding protein
gene-H6G84_RS08000	-4.07434	3.46e-25	5.2673e-24	NA	NA
gene-H6G84_RS08005	0.48548	0.00310716	0.00545859	WP_011378523.1	molecular chaperone DnaK
gene-H6G84_RS08010	0.669635	0.000314289	0.000645196	WP_011243841.1	DnaJ domain-containing protein
gene-H6G84_RS08015	0.143246	0.362313	0.417299	WP_039755524.1	DUF3110 domain-containing protein
gene-H6G84_RS08020	0.0733807	0.60432	0.65176	WP_011243843.1	N-acetylmuramic acid 6-phosphate etherase
gene-H6G84_RS08025	1.3569	2.2136e-18	1.95073e-17	WP_011378522.1	site-2 protease family protein
gene-H6G84_RS08035	0.247587	0.176472	0.220303	WP_011242481.1	carbonic anhydrase family protein
gene-H6G84_RS08040	0.329182	0.0295081	0.0434115	WP_011242482.1	ATP-dependent sacrificial sulfur transferase LarE
gene-H6G84_RS08045	0.842153	7.23845e-09	2.64915e-08	WP_011378014.1	cob(I)yrinic acid a%2Cc-diamide adenosyltransferase
gene-H6G84_RS08050	0.326608	0.0369023	0.0533807	WP_011378013.1	hypothetical protein
gene-H6G84_RS08055	-0.0851584	0.53689	0.589238	WP_231621303.1	META domain-containing protein
gene-H6G84_RS08065	-0.858635	1.79667e-09	6.9859e-09	WP_011378011.1	EAL domain-containing protein
gene-H6G84_RS08070	-0.771277	4.38363e-07	1.30631e-06	WP_011378010.1	ABC-F family ATP-binding cassette domain-containing protein
gene-H6G84_RS08075	-0.533976	0.000602056	0.00118509	WP_011242490.1	solute carrier family 26 protein
gene-H6G84_RS08080	-0.360134	0.01577	0.0244066	WP_011242491.1	acetyl-CoA carboxylase biotin carboxylase subunit
gene-H6G84_RS08090	-0.841753	1.0298e-07	3.30398e-07	WP_231621304.1	lipid-A-disaccharide synthase
gene-H6G84_RS08095	-0.878578	1.51086e-07	4.72298e-07	WP_011242493.1	bifunctional (p)ppGpp synthetase/guanosine-3'%2C5'-bis(diphosphate) 3'-pyrophosphohydrolase
gene-H6G84_RS08100	-1.49468	3.66046e-20	3.70052e-19	WP_152034138.1	hypothetical protein
gene-H6G84_RS08105	0.916408	6.04477e-10	2.44992e-09	WP_011242495.1	NAD(P)H-dependent oxidoreductase
gene-H6G84_RS08110	-0.00828924	0.958846	0.965332	WP_011242496.1	RluA family pseudouridine synthase
gene-H6G84_RS08115	-3.17276	7.21375e-61	1.20785e-58	WP_011242497.1	HupE/UreJ family protein
gene-H6G84_RS08120	0.695284	7.10169e-06	1.82062e-05	WP_011378007.1	methionine synthase
gene-H6G84_RS08125	-0.894278	2.10422e-06	5.73468e-06	WP_155813853.1	magnesium/cobalt transporter CorA
gene-H6G84_RS08130	-1.28345	1.04946e-14	6.85733e-14	WP_011378005.1	hypothetical protein
gene-H6G84_RS08135	-1.00231	9.67488e-11	4.30548e-10	WP_011378004.1	recombination mediator RecR
gene-H6G84_RS08140	-0.969073	2.3827e-10	1.02132e-09	WP_011242501.1	SH3 domain-containing protein
gene-H6G84_RS08145	0.187037	0.338939	0.393995	WP_011242502.1	cytochrome P450
gene-H6G84_RS08150	-0.313378	0.0383759	0.0553331	WP_011242503.1	2-carboxy-1%2C4-naphthoquinone phytyltransferase
gene-H6G84_RS08155	0.00560528	1	1	WP_011378003.1	NAAT family transporter
gene-H6G84_RS08160	-0.145028	0.36339	0.418179	WP_199290623.1	DUF6523 family protein
gene-H6G84_RS08165	0.97713	4.96464e-06	1.30651e-05	WP_039755720.1	hypothetical protein
gene-H6G84_RS08170	1.00733	6.08983e-09	2.24411e-08	WP_231621305.1	hypothetical protein
gene-H6G84_RS08175	0.804103	2.17298e-08	7.55047e-08	WP_011242507.1	pentapeptide repeat-containing protein
gene-H6G84_RS08180	1.07584	1.19151e-12	6.51438e-12	WP_234910016.1	LCP family protein
gene-H6G84_RS08185	-0.253108	0.0668857	0.0922217	WP_011242509.1	Coenzyme F420 hydrogenase/dehydrogenase%2C beta subunit C-terminal domain
gene-H6G84_RS08190	-0.710327	0.000160628	0.000342068	WP_011378001.1	SWIM zinc finger family protein
gene-H6G84_RS08195	-0.528635	0.000608282	0.00119647	WP_011378000.1	PAS domain S-box protein
gene-H6G84_RS08200	0.623226	0.00241429	0.00432635	WP_242016332.1	response regulator
gene-H6G84_RS08205	0.809962	1.82786e-08	6.40108e-08	WP_011242514.1	EAL domain-containing protein
gene-H6G84_RS08210	0.286203	0.0672022	0.0926104	WP_011242515.1	MFS transporter
gene-H6G84_RS08215	1.91512	6.36e-26	1.0268e-24	WP_231621308.1	DUF3120 domain-containing protein
gene-H6G84_RS08220	-0.89255	5.31242e-07	1.55882e-06	WP_011242517.1	acetate--CoA ligase
gene-H6G84_RS08225	0.302758	0.128088	0.165054	WP_039755972.1	HAD-IA family hydrolase
gene-H6G84_RS08230	-0.305368	0.349382	0.403794	WP_155813855.1	heterocyst frequency control protein PatD
gene-H6G84_RS08235	-0.047602	0.853703	0.874931	WP_011242519.1	alpha/beta fold hydrolase
gene-H6G84_RS08240	-0.237999	0.195966	0.242158	WP_011377997.1	hypothetical protein
gene-H6G84_RS08245	0.722805	8.38506e-06	2.13532e-05	WP_011242520.1	2-hydroxyacid dehydrogenase
gene-H6G84_RS08250	0.877168	7.06819e-06	1.81376e-05	WP_011242521.1	NADH-quinone oxidoreductase subunit NuoK
gene-H6G84_RS08255	0.852393	2.33657e-05	5.60902e-05	WP_199290632.1	NADH-quinone oxidoreductase subunit J
gene-H6G84_RS08260	0.856164	8.57509e-07	2.43871e-06	WP_011242523.1	NAD(P)H-quinone oxidoreductase subunit I
gene-H6G84_RS08265	0.87657	3.88332e-06	1.03311e-05	WP_011242524.1	NADH-quinone oxidoreductase subunit NuoH
gene-H6G84_RS08270	0.630344	0.000136427	0.000294274	WP_011377995.1	GDP-mannose 4%2C6-dehydratase
gene-H6G84_RS08275	1.57748	1.0879e-23	1.42867e-22	WP_011377994.1	AI-2E family transporter
gene-H6G84_RS08280	1.01467	9.91116e-11	4.40332e-10	WP_011242527.1	peptide deformylase
gene-H6G84_RS08285	0.442913	0.00150808	0.00279017	WP_011242528.1	hypothetical protein
gene-H6G84_RS08290	0.451682	0.00751059	0.0123668	WP_011377993.1	DUF3747 domain-containing protein
gene-H6G84_RS08295	0.463077	0.014788	0.0230331	WP_011377992.1	type I secretion C-terminal target domain-containing protein
gene-H6G84_RS08300	-0.693631	0.000506837	0.00100728	WP_011377991.1	TIGR03032 family protein
gene-H6G84_RS08305	0.924877	2.92535e-05	6.96005e-05	WP_011242533.1	aminotransferase class IV
gene-H6G84_RS08310	1.46198	2.26163e-20	2.30376e-19	WP_011377990.1	aminodeoxychorismate synthase component I
gene-H6G84_RS08315	1.06207	1.88855e-12	1.01799e-11	WP_011242535.1	7-cyano-7-deazaguanine synthase QueC
gene-H6G84_RS08320	0.675399	3.65135e-06	9.73329e-06	WP_011242536.1	7-carboxy-7-deazaguanine synthase QueE
gene-H6G84_RS08325	0.190196	0.294039	0.346712	WP_011242537.1	chlorophyll a/b-binding protein
gene-H6G84_RS08330	1.0446	3.44726e-13	1.95965e-12	WP_011377989.1	methyltransferase domain-containing protein
gene-H6G84_RS08335	0.991152	3.7264e-11	1.73316e-10	WP_231621309.1	TPM domain-containing protein
gene-H6G84_RS08340	1.27903	3.00488e-11	1.4123e-10	WP_011242540.1	DUF1622 domain-containing protein
gene-H6G84_RS08345	0.845335	3.82002e-08	1.29052e-07	WP_011377987.1	hypothetical protein
gene-H6G84_RS08350	1.14752	1.30942e-14	8.47325e-14	WP_011377986.1	transcription-repair coupling factor
gene-H6G84_RS08355	0.319873	0.0253425	0.0377181	WP_011377985.1	replicative DNA helicase
gene-H6G84_RS08360	0.087707	0.585686	0.63473	WP_199290633.1	DEAD/DEAH box helicase
gene-H6G84_RS08365	-1.27121	1.74292e-13	1.01506e-12	WP_011377983.1	DNA-formamidopyrimidine glycosylase
gene-H6G84_RS08370	-1.16401	3.86093e-09	1.45069e-08	WP_011242545.1	photosystem I reaction center subunit IV
gene-H6G84_RS08375	-2.1873	1.99612e-29	4e-28	WP_011377982.1	hypothetical protein
gene-H6G84_RS08380	0.864477	8.80353e-08	2.84152e-07	WP_011242547.1	CHAD domain-containing protein
gene-H6G84_RS08385	0.259291	0.261703	0.312992	WP_011242548.1	bifunctional pyr operon transcriptional regulator/uracil phosphoribosyltransferase PyrR
gene-H6G84_RS08390	-0.201508	0.277519	0.3297	WP_199290634.1	metal ABC transporter permease
gene-H6G84_RS08395	-1.12644	6.63991e-05	0.000149986	WP_011377981.1	metal ABC transporter ATP-binding protein
gene-H6G84_RS08400	-1.00646	5.18189e-06	1.35569e-05	WP_199290626.1	zinc ABC transporter substrate-binding protein
gene-H6G84_RS08405	1.15382	1.33877e-11	6.59297e-11	WP_011242552.1	FADH(2)-oxidizing methylenetetrahydrofolate--tRNA-(uracil(54)-C(5))-methyltransferase TrmFO
gene-H6G84_RS08410	-0.422461	0.0233742	0.0350417	WP_011377979.1	ATP-dependent zinc metalloprotease FtsH
gene-H6G84_RS08415	-0.051447	0.748277	0.78306	WP_011377978.1	aspartate--tRNA ligase
gene-H6G84_RS08420	-0.275165	0.0784463	0.106582	WP_011377977.1	ABC transporter ATP-binding protein/permease
gene-H6G84_RS08425	0.547643	0.0024995	0.00446708	WP_011377976.1	IS630 transposase-related protein
gene-H6G84_RS08430	-1.2229	2.73405e-16	2.05745e-15	WP_199290636.1	LysR family transcriptional regulator
gene-H6G84_RS08435	0.970084	6.22786e-10	2.52031e-09	WP_011377975.1	methylenetetrahydrofolate reductase
gene-H6G84_RS08440	0.1061	0.481943	0.536182	WP_011242559.1	tryptophan--tRNA ligase
gene-H6G84_RS08445	0.254084	0.115613	0.149699	WP_011242560.1	ABC transporter permease
gene-H6G84_RS08450	-0.0337571	0.812954	0.841539	WP_011242561.1	DUF3172 domain-containing protein
gene-H6G84_RS08455	0.232954	0.0997609	0.13159	WP_011377973.1	ABC transporter ATP-binding protein
gene-H6G84_RS08460	0.559149	0.00157648	0.00291268	WP_011377972.1	hypothetical protein
gene-H6G84_RS08465	-0.246494	0.139475	0.178781	WP_011242564.1	hypothetical protein
gene-H6G84_RS08470	-0.106647	0.569919	0.620152	WP_011377971.1	universal stress protein
gene-H6G84_RS08475	-2.17483	2e-28	3.9e-27	WP_011242566.1	RecQ family ATP-dependent DNA helicase
gene-H6G84_RS08480	-0.394858	0.0494506	0.0695424	WP_011242567.1	5-formyltetrahydrofolate cyclo-ligase
gene-H6G84_RS08485	0.472439	0.00544079	0.00918454	WP_011242568.1	DUF362 domain-containing protein
gene-H6G84_RS08490	-2.5316	7.37644e-43	3.46693e-41	WP_011377969.1	GGDEF domain-containing protein
gene-H6G84_RS08495	0.122867	0.502903	0.556726	WP_011242570.1	NADP-dependent malic enzyme
gene-H6G84_RS08500	-0.985078	5.7942e-05	0.00013222	WP_011242571.1	2OG-Fe(II) oxygenase family protein
gene-H6G84_RS08505	-1.01336	7.46735e-09	2.72548e-08	WP_011377968.1	1-acyl-sn-glycerol-3-phosphate acyltransferase
gene-H6G84_RS08510	0.0922839	0.547315	0.599349	WP_011377967.1	serine/threonine-protein kinase
gene-H6G84_RS08515	0.567062	0.000512155	0.0010171	WP_011377966.1	phenylalanine--tRNA ligase subunit beta
gene-H6G84_RS08520	0.0680738	0.618405	0.665611	WP_011377965.1	DNA primase
gene-H6G84_RS08525	-2.28938	2.29032e-31	5.38224e-30	WP_011242576.1	Zn(II)-sensing metalloregulatory transcriptional repressor SmtB
gene-H6G84_RS08530	-0.231398	0.426484	0.4809	WP_011377964.1	metallothionein
gene-H6G84_RS08535	0.920304	2.89244e-08	9.85859e-08	WP_011377963.1	TldD/PmbA family protein
gene-H6G84_RS08540	-1.14466	6.15557e-06	1.59863e-05	WP_011377962.1	DUF4240 domain-containing protein
gene-H6G84_RS08545	0.764013	4.8307e-05	0.000111181	WP_011377961.1	VCBS domain-containing protein
gene-H6G84_RS08550	-0.111213	0.538348	0.590595	WP_011377960.1	molybdopterin molybdotransferase MoeA
gene-H6G84_RS08555	0.00351904	1	1	WP_011377959.1	bifunctional molybdenum cofactor biosynthesis protein MoaC/MoaB
gene-H6G84_RS08560	-0.357113	0.0702466	0.0964586	WP_011377958.1	molybdopterin synthase sulfur carrier subunit MoaD
gene-H6G84_RS08565	-0.468767	0.00960699	0.0155888	WP_011377957.1	molybdenum cofactor biosynthesis protein MoaE
gene-H6G84_RS08570	-0.422117	0.00818436	0.0134103	WP_011377956.1	GTP 3'%2C8-cyclase MoaA
gene-H6G84_RS08575	0.328848	0.0311098	0.0455926	WP_011377955.1	hypothetical protein
gene-H6G84_RS08580	0.361915	0.012238	0.0194804	WP_011377954.1	FUSC family protein
gene-H6G84_RS08585	0.304816	0.20522	0.252658	WP_011377953.1	hypothetical protein
gene-H6G84_RS08590	-0.361794	0.0560088	0.0780684	WP_011242588.1	50S ribosomal protein L35
gene-H6G84_RS08595	-0.162079	0.34535	0.400175	WP_011242589.1	50S ribosomal protein L20
gene-H6G84_RS08600	0.367746	0.0432543	0.0616047	WP_011242590.1	transporter substrate-binding domain-containing protein
gene-H6G84_RS08605	0.634967	5.83558e-05	0.000133051	WP_011377952.1	DUF389 domain-containing protein
gene-H6G84_RS08610	-0.900562	3.46412e-09	1.30894e-08	WP_011242592.1	tetratricopeptide repeat protein
gene-H6G84_RS08615	0.198676	0.247589	0.298242	WP_011377951.1	bifunctional ADP-dependent NAD(P)H-hydrate dehydratase/NAD(P)H-hydrate epimerase
gene-H6G84_RS08620	-1.46717	6.48128e-08	2.12007e-07	WP_011377950.1	SRPBCC family protein
gene-H6G84_RS08625	-1.90271	3.56869e-35	1.05061e-33	WP_011242595.1	hypothetical protein
gene-H6G84_RS08630	1.52434	3.04033e-23	3.86021e-22	WP_039755725.1	hypothetical protein
gene-H6G84_RS08635	-0.50136	0.00351391	0.00612477	WP_199290637.1	magnesium transporter
gene-H6G84_RS08640	0.316606	0.034712	0.0504303	WP_011242597.1	phosphoglucomutase/phosphomannomutase family protein
gene-H6G84_RS08645	-0.570701	8.55223e-05	0.000189507	WP_011377947.1	HpsJ family protein
gene-H6G84_RS08650	-0.895087	1.8278e-09	7.09662e-09	WP_011377946.1	RdgB/HAM1 family non-canonical purine NTP pyrophosphatase
gene-H6G84_RS08655	0.575585	0.000140867	0.000302875	WP_011377945.1	TrkA family potassium uptake protein
gene-H6G84_RS08660	0.586137	0.000109786	0.000240292	WP_234910015.1	sodium:proton antiporter
gene-H6G84_RS08665	-2.14194	4.07172e-39	1.51502e-37	WP_011377943.1	THUMP domain-containing protein
gene-H6G84_RS08670	-0.718795	1.48296e-06	4.09152e-06	WP_011242603.1	NAD(P)/FAD-dependent oxidoreductase
gene-H6G84_RS08675	-0.371408	0.0209006	0.0315985	WP_039755727.1	triose-phosphate isomerase
gene-H6G84_RS08680	0.387461	0.0182299	0.0279394	WP_011377941.1	M48 family metallopeptidase
gene-H6G84_RS08685	1.6776	2.05614e-22	2.44818e-21	WP_011377940.1	TRC40/GET3/ArsA family transport-energizing ATPase
gene-H6G84_RS08690	0.805155	2.68714e-06	7.2569e-06	WP_011377939.1	DUF2358 domain-containing protein
gene-H6G84_RS08695	1.12677	2.82123e-12	1.5026e-11	WP_011377938.1	chloride channel protein
gene-H6G84_RS08700	1.35084	3.8462e-18	3.35634e-17	WP_011242609.1	glutathione S-transferase family protein
gene-H6G84_RS08705	-0.37008	0.0261942	0.0388993	WP_011242610.1	aminotransferase class V-fold PLP-dependent enzyme
gene-H6G84_RS08710	-0.399551	0.0186085	0.0284382	WP_039755728.1	cyclic nucleotide-binding domain-containing protein
gene-H6G84_RS08715	-0.0825737	0.582962	0.63229	WP_011377937.1	hypothetical protein
gene-H6G84_RS08720	0.639159	0.000497266	0.00098973	WP_011377936.1	metallophosphoesterase
gene-H6G84_RS08725	1.79075	6.69538e-18	5.69426e-17	WP_011242613.1	tRNA (adenosine(37)-N6)-threonylcarbamoyltransferase complex transferase subunit TsaD
gene-H6G84_RS08730	-0.885072	4.12237e-06	1.09237e-05	WP_011242614.1	photosystem I reaction center subunit III
gene-H6G84_RS08735	-0.732035	5.98155e-05	0.000136148	WP_173282512.1	photosystem I reaction center subunit IX
gene-H6G84_RS08740	1.14626	1.78243e-10	7.71427e-10	WP_011377935.1	hypothetical protein
gene-H6G84_RS08745	0.801269	1.51942e-05	3.75511e-05	WP_011242617.1	hypothetical protein
gene-H6G84_RS08750	0.940979	3.21426e-11	1.50279e-10	WP_011377934.1	carotene isomerase
gene-H6G84_RS08755	-2.43099	6.01727e-20	5.97047e-19	WP_197058178.1	AAA-associated domain-containing protein
gene-H6G84_RS08760	-1.55877	3.0775e-24	4.20639e-23	WP_011377932.1	ABC transporter ATP-binding protein
gene-H6G84_RS08765	-0.949778	3.36007e-05	7.89616e-05	WP_011242621.1	Crp/Fnr family transcriptional regulator
gene-H6G84_RS08770	-1.68733	1.06286e-07	3.40191e-07	WP_155813857.1	hypothetical protein
gene-H6G84_RS08775	-0.952731	3.5329e-09	1.33117e-08	WP_011242622.1	LysR family transcriptional regulator
gene-H6G84_RS08780	-2.27348	1.47108e-42	6.56838e-41	WP_011242623.1	HEAT repeat domain-containing protein
gene-H6G84_RS08785	0.322755	0.180012	0.224095	WP_011242624.1	ferredoxin--nitrite reductase
gene-H6G84_RS08790	-0.318251	0.112141	0.145979	WP_011242625.1	ABC transporter substrate-binding protein
gene-H6G84_RS08795	-0.533658	0.00221177	0.00399551	WP_011242626.1	nitrate ABC transporter permease
gene-H6G84_RS08800	-0.49996	0.00432497	0.00745598	WP_011242627.1	nitrate ABC transporter ATP-binding protein
gene-H6G84_RS08805	-0.484134	0.00268355	0.00477373	WP_011242628.1	nitrate ABC transporter ATP-binding protein
gene-H6G84_RS08810	-0.819418	1.5244e-08	5.38769e-08	WP_011377931.1	nitrate reductase catalytic subunit
gene-H6G84_RS08815	-0.547498	0.00515764	0.00874514	WP_011377930.1	isoprenylcysteine carboxylmethyltransferase family protein
gene-H6G84_RS08820	-0.419062	0.106033	0.13877	WP_011242631.1	potassium channel family protein
gene-H6G84_RS08825	0.463529	0.00679711	0.0112752	WP_011242632.1	cytochrome b6-f complex iron-sulfur subunit
gene-H6G84_RS08830	0.785461	3.50981e-05	8.2264e-05	WP_011242633.1	apocytochrome f
gene-H6G84_RS08835	0.82778	6.0332e-07	1.7578e-06	WP_199290639.1	prolipoprotein diacylglyceryl transferase
gene-H6G84_RS08840	0.756482	5.83346e-07	1.70796e-06	WP_011242635.1	precorrin-4 C(11)-methyltransferase
gene-H6G84_RS08845	0.0417253	0.834939	0.859317	WP_011377927.1	DMT family transporter
gene-H6G84_RS08850	-1.80046	1.08872e-18	9.7875e-18	WP_011242637.1	DNA repair protein RadC
gene-H6G84_RS08855	-1.39713	5.13513e-06	1.34477e-05	NA	NA
gene-H6G84_RS08860	-0.54846	0.00120048	0.00226007	WP_011377926.1	insulinase family protein
gene-H6G84_RS08865	-3.66687	4.73781e-74	1.81323e-71	WP_011377925.1	phycocyanobilin:ferredoxin oxidoreductase
gene-H6G84_RS08870	1.03761	4.8397e-10	1.98858e-09	WP_011242640.1	HlyD family efflux transporter periplasmic adaptor subunit
gene-H6G84_RS08875	1.7379	1.785e-25	2.7807e-24	WP_011377924.1	ABC transporter permease DevC
gene-H6G84_RS08880	0.601442	0.00203027	0.00369252	WP_011242642.1	tRNA pseudouridine(55) synthase TruB
gene-H6G84_RS08885	-0.288821	0.0685727	0.0944019	WP_011377923.1	response regulator
gene-H6G84_RS08890	-0.0418848	0.797453	0.828695	WP_011242644.1	50S ribosomal protein L27
gene-H6G84_RS08895	-0.220963	0.206182	0.25361	WP_011377922.1	50S ribosomal protein L21
gene-H6G84_RS08900	0.982129	4.63814e-10	1.91457e-09	WP_199290641.1	circadian clock protein KaiA
gene-H6G84_RS08905	0.979208	3.23961e-07	9.86241e-07	WP_011242647.1	circadian clock protein KaiB
gene-H6G84_RS08910	1.45107	5.46991e-17	4.36128e-16	WP_011242648.1	circadian clock protein KaiC
gene-H6G84_RS08915	2.29826	1.99608e-35	5.94167e-34	WP_011377920.1	acyl-CoA dehydrogenase family protein
gene-H6G84_RS08920	2.35242	3.14494e-38	1.12337e-36	WP_173282542.1	glutathione peroxidase
gene-H6G84_RS08925	-1.84451	1.19075e-17	9.93778e-17	WP_011377919.1	type II toxin-antitoxin system VapC family toxin
gene-H6G84_RS08930	-1.63032	1.8216e-14	1.15368e-13	WP_039755738.1	hypothetical protein
gene-H6G84_RS08935	0.289349	0.0982989	0.129853	WP_126148152.1	DUF4160 domain-containing protein
gene-H6G84_RS08940	0.318502	0.0608252	0.084343	WP_011242653.1	DUF2442 domain-containing protein
gene-H6G84_RS08945	0.254434	0.150153	0.191006	WP_199290642.1	DUF4160 domain-containing protein
gene-H6G84_RS08950	-0.484447	0.00494502	0.00840058	WP_011242655.1	DUF2442 domain-containing protein
gene-H6G84_RS08955	-0.313855	0.0426524	0.0608205	WP_011242656.1	type II toxin-antitoxin system prevent-host-death family antitoxin
gene-H6G84_RS08960	-0.0327596	0.865547	0.88444	WP_011242657.1	Txe/YoeB family addiction module toxin
gene-H6G84_RS08965	-0.726808	0.0255723	0.0379967	WP_231621315.1	DUF2281 domain-containing protein
gene-H6G84_RS08975	-1.10345	0.000139548	0.000300522	WP_190528567.1	type II toxin-antitoxin system prevent-host-death family antitoxin
gene-H6G84_RS08980	-1.05677	0.000426967	0.000858098	WP_011242660.1	type II toxin-antitoxin system VapC family toxin
gene-H6G84_RS08985	0.379045	0.00999216	0.0161746	WP_011377916.1	glycosyltransferase family 39 protein
gene-H6G84_RS08990	0.677421	7.6924e-05	0.000171733	WP_011377915.1	glycosyltransferase
gene-H6G84_RS08995	0.350509	0.0269606	0.039971	WP_011377914.1	flippase-like domain-containing protein
gene-H6G84_RS09000	-0.69572	0.000203331	0.000426565	WP_011242664.1	RNA methyltransferase
gene-H6G84_RS09010	0.994736	1.03045e-10	4.57048e-10	WP_011242666.1	indole-3-glycerol phosphate synthase TrpC
gene-H6G84_RS09015	-1.13448	1.7601e-14	1.12269e-13	WP_011242667.1	DUF3148 domain-containing protein
gene-H6G84_RS09020	-0.2667	0.0565416	0.0787702	WP_011377911.1	hypothetical protein
gene-H6G84_RS09025	0.652597	1.36969e-05	3.41339e-05	WP_039755983.1	pyridoxine 5'-phosphate synthase
gene-H6G84_RS09030	-0.151847	0.358375	0.413118	WP_039755741.1	1-acyl-sn-glycerol-3-phosphate acyltransferase
gene-H6G84_RS09035	0.839176	8.27831e-08	2.68494e-07	WP_011377909.1	hypothetical protein
gene-H6G84_RS09040	-2.18586	2.88962e-31	6.73156e-30	WP_011377908.1	guanylate kinase
gene-H6G84_RS09045	1.51104	7.81919e-17	6.14299e-16	WP_011377907.1	leucyl aminopeptidase
gene-H6G84_RS09050	1.27956	3.4835e-09	1.31441e-08	WP_011242674.1	molybdenum cofactor guanylyltransferase
gene-H6G84_RS09055	0.0967191	0.54525	0.597433	WP_011242675.1	DUF4346 domain-containing protein
gene-H6G84_RS09065	1.10019	4.57207e-11	2.10819e-10	WP_011377905.1	dihydrofolate reductase family protein
gene-H6G84_RS09070	0.76511	2.6229e-05	6.26828e-05	WP_011242677.1	hypothetical protein
gene-H6G84_RS09075	0.685823	2.6333e-06	7.12996e-06	WP_039755743.1	6-carboxytetrahydropterin synthase
gene-H6G84_RS09080	0.0275448	0.838398	0.861223	WP_242016333.1	hypothetical protein
gene-H6G84_RS09085	1.62632	4.70147e-22	5.45248e-21	WP_199290645.1	NAD(P)H-quinone oxidoreductase subunit J
gene-H6G84_RS09090	1.7327	5.04079e-23	6.34004e-22	WP_011242681.1	NADH dehydrogenase subunit K
gene-H6G84_RS09095	1.83747	2.7e-26	4.528e-25	WP_011242682.1	photosynthetic/respiratory NAD(P)H-quinone oxidoreductase subunit C
gene-H6G84_RS09100	1.15373	2.78082e-14	1.7529e-13	WP_011242683.1	rubredoxin
gene-H6G84_RS09105	1.73451	1.07e-26	1.839e-25	WP_011377902.1	photosynthesis system II assembly factor Ycf48
gene-H6G84_RS09110	-0.111873	0.512758	0.566101	WP_011242685.1	cytochrome b559 subunit alpha
gene-H6G84_RS09115	-0.0716396	0.686307	0.726439	WP_011242686.1	cytochrome b559 subunit beta
gene-H6G84_RS09120	-0.0255845	0.881751	0.898179	WP_011377901.1	photosystem II reaction center protein L
gene-H6G84_RS09130	-0.587115	0.00681252	0.0112938	WP_011377899.1	TIGR04283 family arsenosugar biosynthesis glycosyltransferase
gene-H6G84_RS09135	0.691194	4.72066e-06	1.24475e-05	WP_231621316.1	apolipoprotein N-acyltransferase
gene-H6G84_RS09140	0.039691	0.838971	0.86148	WP_011377897.1	cryptochrome/photolyase family protein
gene-H6G84_RS09145	0.16815	0.261081	0.312388	WP_011242692.1	2-C-methyl-D-erythritol 2%2C4-cyclodiphosphate synthase
gene-H6G84_RS09150	0.425232	0.00655977	0.0109289	WP_011377896.1	ABC transporter substrate-binding protein
gene-H6G84_RS09155	0.0531295	0.785542	0.817904	WP_011377895.1	nickel pincer cofactor biosynthesis protein LarB
gene-H6G84_RS09160	0.0180487	0.914921	0.92799	WP_011377894.1	phycobiliprotein lyase
gene-H6G84_RS09165	-0.640743	0.00486214	0.00827553	WP_199290646.1	recombinase family protein
gene-H6G84_RS09175	-1.21183	2.62131e-10	1.11646e-09	WP_011377892.1	hypothetical protein
gene-H6G84_RS09185	0.222949	0.232431	0.281884	WP_011377891.1	MFS transporter
gene-H6G84_RS09190	-0.440018	0.0409511	0.0586674	WP_011242700.1	DMT family transporter
gene-H6G84_RS09195	-0.98841	9.15164e-05	0.000201954	WP_011242701.1	DMT family transporter
gene-H6G84_RS09200	-0.980913	6.71636e-07	1.94101e-06	WP_011242702.1	NAD-dependent epimerase/dehydratase family protein
gene-H6G84_RS09205	1.0001	3.4544e-07	1.04806e-06	WP_011242703.1	MarR family transcriptional regulator
gene-H6G84_RS09210	-1.06795	5.27487e-11	2.4115e-10	WP_011377890.1	EAL domain-containing protein
gene-H6G84_RS09215	-0.146332	0.30209	0.355267	WP_011377889.1	UvrD-helicase domain-containing protein
gene-H6G84_RS09220	0.384448	0.0101748	0.0164306	WP_011377888.1	PD-(D/E)XK nuclease family protein
gene-H6G84_RS09225	-0.494456	0.0515098	0.0721731	WP_011242707.1	hypothetical protein
gene-H6G84_RS09230	-1.93391	6.6e-27	1.144e-25	WP_011377886.1	50S ribosome-binding GTPase
gene-H6G84_RS09235	-1.62221	2.15298e-11	1.03181e-10	WP_011242709.1	YfjP family GTPase
gene-H6G84_RS09245	1.94855	7.32709e-33	1.92444e-31	WP_011242711.1	bifunctional pantoate--beta-alanine ligase/(d)CMP kinase
gene-H6G84_RS09250	0.37721	0.0337316	0.0490858	WP_011242712.1	DUF305 domain-containing protein
gene-H6G84_RS09255	-1.23355	9.18159e-05	0.000202448	NA	NA
gene-H6G84_RS09260	-0.359047	0.0190089	0.0289675	WP_011377884.1	SDR family oxidoreductase
gene-H6G84_RS09265	-4.08846	2.84432e-75	1.26999e-72	WP_011242714.1	HD domain-containing protein
gene-H6G84_RS09270	-1.46105	2.01252e-10	8.66806e-10	WP_011242715.1	hypothetical protein
gene-H6G84_RS09275	0.365503	0.0136144	0.0213667	WP_011242716.1	BolA family transcriptional regulator
gene-H6G84_RS09280	0.276458	0.0804398	0.108948	WP_039755754.1	Grx4 family monothiol glutaredoxin
gene-H6G84_RS09285	-0.345568	0.0199534	0.0303034	NA	NA
gene-H6G84_RS09290	0.220614	0.170821	0.213945	WP_011377882.1	LPS export ABC transporter periplasmic protein LptC
gene-H6G84_RS09295	-0.616803	2.0115e-05	4.89447e-05	WP_011242719.1	NYN domain-containing protein
gene-H6G84_RS09300	0.696983	1.98963e-06	5.43345e-06	WP_011242720.1	methionine--tRNA ligase
gene-H6G84_RS09305	-1.25679	8.17577e-09	2.97593e-08	WP_011377881.1	TerB family tellurite resistance protein
gene-H6G84_RS09310	-0.583108	0.0032788	0.00573536	WP_199290648.1	FAD-dependent oxidoreductase
gene-H6G84_RS09315	0.44868	0.003555	0.00618834	WP_199290808.1	pilus motility taxis protein HmpF
gene-H6G84_RS09320	-0.444701	0.0353482	0.0513268	WP_039755989.1	tRNA lysidine(34) synthetase TilS
gene-H6G84_RS09325	-0.157236	0.362589	0.417437	WP_011242725.1	DUF561 domain-containing protein
gene-H6G84_RS09330	0.870481	1.51105e-09	5.93564e-09	WP_011377877.1	M1 family metallopeptidase
gene-H6G84_RS09335	-0.386907	0.236054	0.285761	WP_011242727.1	gamma-glutamylcyclotransferase
gene-H6G84_RS09340	-0.7886	0.0207023	0.0313342	WP_126148198.1	hypothetical protein
gene-H6G84_RS09345	-0.348655	0.322341	0.375752	WP_126148199.1	hypothetical protein
gene-H6G84_RS09350	-0.761031	0.0921435	0.122447	WP_155813861.1	hypothetical protein
gene-H6G84_RS09355	0.397977	0.358088	0.413049	WP_126148201.1	hypothetical protein
gene-H6G84_RS09360	-0.957327	0.00136707	0.00254686	WP_234910013.1	peptidase domain-containing ABC transporter
gene-H6G84_RS09365	0.281959	0.20349	0.250759	WP_011377875.1	HlyD family efflux transporter periplasmic adaptor subunit
gene-H6G84_RS09370	-1.26843	3.00445e-11	1.4123e-10	WP_011242730.1	ferredoxin-thioredoxin reductase variable chain
gene-H6G84_RS09375	0.26091	0.0872009	0.116631	WP_011377874.1	serine/threonine-protein phosphatase
gene-H6G84_RS09380	0.00180792	0.955384	0.96257	WP_011377873.1	hypothetical protein
gene-H6G84_RS09385	0.948034	1.24095e-05	3.10702e-05	WP_011242733.1	DUF4214 domain-containing protein
gene-H6G84_RS09390	0.894632	9.64303e-08	3.10128e-07	WP_011242734.1	TldD/PmbA family protein
gene-H6G84_RS09395	-1.2502	1.06826e-15	7.59114e-15	WP_011242735.1	ABC transporter permease
gene-H6G84_RS09400	-1.78482	6.94553e-22	7.95174e-21	WP_242016334.1	Hpt domain-containing protein
gene-H6G84_RS09405	-0.277365	0.163346	0.205351	WP_199290651.1	ribonuclease R
gene-H6G84_RS09410	0.784796	1.83963e-05	4.5008e-05	WP_011242738.1	30S ribosomal protein S18
gene-H6G84_RS09415	0.671049	0.000483316	0.000963396	WP_011242739.1	50S ribosomal protein L33
gene-H6G84_RS09420	-0.47126	0.00280697	0.0049669	WP_011377871.1	serine/threonine protein kinase
gene-H6G84_RS09425	2.47632	2e-28	3.7e-27	WP_011377870.1	high light inducible protein
gene-H6G84_RS09430	-1.12681	6.42197e-10	2.59494e-09	WP_231621404.1	TVP38/TMEM64 family protein
gene-H6G84_RS09435	0.169509	0.311986	0.365461	WP_011377869.1	mercuric reductase
gene-H6G84_RS09440	-0.24876	0.187409	0.232439	WP_011242744.1	hypothetical protein
gene-H6G84_RS09445	1.17618	2.5016e-11	1.19037e-10	WP_199290652.1	phosphoglycerate kinase
gene-H6G84_RS09450	-0.414657	0.00456248	0.00780793	WP_011242746.1	universal stress protein
gene-H6G84_RS09455	-0.152839	0.278038	0.33017	WP_011242747.1	ribosome biogenesis GTPase YlqF
gene-H6G84_RS09460	0.0948017	0.538619	0.590651	WP_011242748.1	AI-2E family transporter
gene-H6G84_RS09465	0.361762	0.0182424	0.0279425	WP_011242749.1	RluA family pseudouridine synthase
gene-H6G84_RS09470	0.776434	1.53593e-06	4.23328e-06	WP_199290653.1	serine/threonine protein kinase
gene-H6G84_RS09475	-0.644263	1.80072e-05	4.4164e-05	WP_011242751.1	response regulator
gene-H6G84_RS09480	-0.833577	5.22552e-05	0.000119959	WP_011377866.1	threonine-phosphate decarboxylase CobD
gene-H6G84_RS09485	-1.10394	4.09762e-05	9.51258e-05	WP_011242753.1	HU family DNA-binding protein
gene-H6G84_RS09490	-0.738482	3.04903e-07	9.30336e-07	WP_011242754.1	pentapeptide repeat-containing protein
gene-H6G84_RS09495	-1.04709	2.53739e-08	8.72614e-08	WP_011242755.1	CRR6 family NdhI maturation factor
gene-H6G84_RS09500	-0.3767	0.0136303	0.0213791	WP_011242756.1	iron-sulfur cluster carrier protein ApbC
gene-H6G84_RS09505	1.08593	1.72256e-11	8.37521e-11	WP_011377865.1	rod shape-determining protein RodA
gene-H6G84_RS09510	0.517259	0.00264698	0.00471493	WP_011377864.1	glucosamine-6-phosphate deaminase
gene-H6G84_RS09515	0.381381	0.0309121	0.0453277	WP_011242759.1	hypothetical protein
gene-H6G84_RS09520	0.962823	2.82051e-08	9.62567e-08	WP_011242760.1	trypsin-like peptidase domain-containing protein
gene-H6G84_RS09525	-1.17712	1.23472e-15	8.7048e-15	WP_011377863.1	chromosomal replication initiator protein DnaA
gene-H6G84_RS09530	-0.470382	0.00938218	0.0152517	WP_011242762.1	bifunctional demethylmenaquinone methyltransferase/2-methoxy-6-polyprenyl-1%2C4-benzoquinol methylase UbiE
gene-H6G84_RS09535	0.0608119	0.728461	0.763516	WP_011377862.1	DUF445 family protein
gene-H6G84_RS09540	0.387178	0.046604	0.0659547	WP_011377861.1	phosphomethylpyrimidine synthase
gene-H6G84_RS09545	-1.00123	4.12344e-10	1.70737e-09	WP_011242766.1	hypothetical protein
gene-H6G84_RS09550	-0.418593	0.0281888	0.0416306	WP_234910012.1	TenA family protein
gene-H6G84_RS09555	0.153238	0.308882	0.362142	WP_011377860.1	anhydro-N-acetylmuramic acid kinase
gene-H6G84_RS09560	-0.563034	0.00134335	0.00250441	WP_011242769.1	class I SAM-dependent methyltransferase
gene-H6G84_RS09565	-0.47777	0.215907	0.264117	WP_162010010.1	hypothetical protein
gene-H6G84_RS09570	-1.08704	2.65658e-06	7.18161e-06	WP_011242770.1	SAM-dependent methyltransferase
gene-H6G84_RS09575	1.44287	3.11482e-17	2.53635e-16	WP_011242771.1	TPM domain-containing protein
gene-H6G84_RS09580	-1.40507	1.23351e-14	8.00139e-14	WP_039755993.1	ATP-dependent chaperone ClpB
gene-H6G84_RS09585	0.0695232	0.694557	0.733722	WP_011242773.1	plastocyanin
gene-H6G84_RS09590	-0.540377	0.000418277	0.000841264	WP_234910011.1	NAD(P)-dependent oxidoreductase
gene-H6G84_RS09595	-1.80718	1.67432e-21	1.85132e-20	WP_011242775.1	uroporphyrinogen decarboxylase
gene-H6G84_RS09600	0.409467	0.00477207	0.00813255	WP_011242776.1	1%2C4-alpha-glucan branching protein GlgB
gene-H6G84_RS09605	0.215617	0.651062	0.696008	WP_242016335.1	hypothetical protein
gene-H6G84_RS09610	0.774066	2.20389e-08	7.64795e-08	WP_231621318.1	glycosyltransferase family 2 protein
gene-H6G84_RS09615	0.668991	0.000796464	0.00153949	WP_049749327.1	cation-translocating P-type ATPase
gene-H6G84_RS09620	-0.0189617	0.901778	0.916141	WP_011242780.1	TrkA family potassium uptake protein
gene-H6G84_RS09625	0.00545606	0.984365	0.987683	WP_011377856.1	TrkH family potassium uptake protein
gene-H6G84_RS09630	0.629155	2.86542e-05	6.82351e-05	WP_011242782.1	ATP-dependent DNA helicase RecG
gene-H6G84_RS09635	0.261866	0.10353	0.135893	WP_011377855.1	hypothetical protein
gene-H6G84_RS09640	0.468141	0.0100485	0.016256	WP_011377854.1	DUF3067 family protein
gene-H6G84_RS09645	-0.483491	0.0526366	0.0736363	WP_011242785.1	YbjN domain-containing protein
gene-H6G84_RS09650	-0.759785	0.00236374	0.00424711	WP_011242786.1	hypothetical protein
gene-H6G84_RS09655	-0.508184	0.0333351	0.0485412	WP_011242787.1	hypothetical protein
gene-H6G84_RS09660	0.540901	0.00166798	0.00306693	WP_011242788.1	ribonuclease PH
gene-H6G84_RS09665	0.065734	0.682101	0.723416	WP_011377853.1	P-loop NTPase family protein
gene-H6G84_RS09670	0.35419	0.0235404	0.0352517	WP_199290657.1	bifunctional nuclease family protein
gene-H6G84_RS09675	0.0458177	0.761716	0.795793	WP_011242791.1	aldo/keto reductase
gene-H6G84_RS09680	0.136389	0.374931	0.429983	WP_126146592.1	hypothetical protein
gene-H6G84_RS09685	0.414909	0.00620905	0.0103898	WP_011377850.1	2-oxo acid dehydrogenase subunit E2
gene-H6G84_RS09690	0.213344	0.239273	0.289266	WP_011242794.1	DUF4145 domain-containing protein
gene-H6G84_RS09695	-0.016279	0.914974	0.92799	WP_011242795.1	type I restriction endonuclease
gene-H6G84_RS09700	-0.535328	0.000695249	0.00135657	WP_011377848.1	restriction endonuclease subunit S
gene-H6G84_RS09705	-0.264915	0.223886	0.272881	WP_011242797.1	DUF4351 domain-containing protein
gene-H6G84_RS09710	-0.297123	0.193812	0.239714	WP_011377847.1	DUF4351 domain-containing protein
gene-H6G84_RS09715	0.27291	0.141231	0.180601	WP_011242799.1	DUF4351 domain-containing protein
gene-H6G84_RS09720	1.26492	4.56701e-06	1.20661e-05	WP_039755764.1	hypothetical protein
gene-H6G84_RS09725	0.971555	2.72419e-11	1.29372e-10	WP_011242800.1	type I restriction-modification system subunit M
gene-H6G84_RS09730	0.785862	1.90649e-05	4.6601e-05	WP_011242801.1	DUF1517 domain-containing protein
gene-H6G84_RS09735	1.13408	1.01744e-11	5.0948e-11	WP_011242802.1	sulfur carrier protein ThiS
gene-H6G84_RS09740	-0.102112	0.568984	0.619637	WP_011377846.1	thiamine phosphate synthase
gene-H6G84_RS09745	0.0756395	0.578198	0.627885	WP_011242804.1	helix-turn-helix domain-containing protein
gene-H6G84_RS09750	-0.205444	0.271879	0.323873	WP_011377845.1	HEAT repeat domain-containing protein
gene-H6G84_RS09755	-0.806527	0.000163668	0.00034799	WP_011242806.1	HEAT repeat domain-containing protein
gene-H6G84_RS09760	-1.09557	8.24364e-10	3.29131e-09	WP_011242807.1	phycocyanin subunit alpha
gene-H6G84_RS09765	-1.4291	3.42417e-14	2.12346e-13	WP_011242808.1	phycocyanin subunit beta
gene-H6G84_RS09770	-1.59896	1.62509e-21	1.80648e-20	WP_011242809.1	phycobilisome linker polypeptide
gene-H6G84_RS09775	-1.75897	2.56476e-19	2.41087e-18	WP_011242810.1	phycobilisome rod-core linker polypeptide
gene-H6G84_RS09780	-1.36665	1.92606e-10	8.30904e-10	WP_011377844.1	phycobilisome linker polypeptide
gene-H6G84_RS09785	-1.76357	7.97633e-17	6.24812e-16	WP_011242807.1	phycocyanin subunit alpha
gene-H6G84_RS09790	-2.1667	1.71e-26	2.923e-25	WP_011242808.1	phycocyanin subunit beta
gene-H6G84_RS09795	-0.349421	0.0531918	0.0743353	WP_011377843.1	hypothetical protein
gene-H6G84_RS09800	0.217693	0.171137	0.214241	WP_011377842.1	SpoIID/LytB domain-containing protein
gene-H6G84_RS09805	-0.701493	5.13212e-06	1.34477e-05	WP_011242816.1	FAD-dependent thymidylate synthase
gene-H6G84_RS09810	-0.340338	0.0247983	0.0370522	WP_242016336.1	SEC59/DGK1/VTE5 family protein
gene-H6G84_RS09815	-0.461953	0.00270555	0.00480329	WP_011242818.1	hypothetical protein
gene-H6G84_RS09820	-2.16284	1.09699e-15	7.77468e-15	WP_155813863.1	hypothetical protein
gene-H6G84_RS09825	-2.29532	9.01177e-32	2.23542e-30	WP_011242819.1	GIY-YIG nuclease family protein
gene-H6G84_RS09830	0.780795	0.00559934	0.00942843	WP_011242820.1	nuclear transport factor 2 family protein
gene-H6G84_RS09835	0.979448	6.78851e-07	1.95974e-06	WP_231621319.1	photosystem II reaction center PsbP family protein
gene-H6G84_RS09840	0.235479	0.0793409	0.107514	WP_011377840.1	biosynthetic arginine decarboxylase
gene-H6G84_RS09845	-0.782213	3.26367e-06	8.75212e-06	WP_011377839.1	hypothetical protein
gene-H6G84_RS09850	-0.10819	0.447318	0.501198	WP_011377838.1	proteasome-type protease
gene-H6G84_RS09855	-0.965942	2.48248e-09	9.50081e-09	WP_011377837.1	transglutaminase family protein
gene-H6G84_RS09860	-0.769203	1.41766e-05	3.52966e-05	WP_011242826.1	alpha-E domain-containing protein
gene-H6G84_RS09865	0.103999	0.668978	0.710906	WP_199290659.1	circularly permuted type 2 ATP-grasp protein
gene-H6G84_RS09870	0.0674896	0.65481	0.698141	WP_011377834.1	histidinol-phosphate transaminase
gene-H6G84_RS09875	-0.0866247	0.55909	0.610351	WP_011242829.1	branched-chain amino acid transaminase
gene-H6G84_RS09880	-0.209161	0.162534	0.204427	WP_011242830.1	alpha/beta fold hydrolase
gene-H6G84_RS09885	-0.430537	0.0496792	0.0698271	WP_173282518.1	DUF370 domain-containing protein
gene-H6G84_RS09890	0.198303	0.209896	0.257587	WP_011242832.1	fibronectin-binding domain-containing protein
gene-H6G84_RS09895	-0.57051	0.0102402	0.0165261	WP_231621320.1	tetratricopeptide repeat protein
gene-H6G84_RS09900	0.611553	3.09503e-05	7.34418e-05	WP_231621321.1	DMT family transporter
gene-H6G84_RS09905	0.474345	0.00398722	0.00690644	WP_199290628.1	hypothetical protein
gene-H6G84_RS09910	0.175189	0.26955	0.321516	WP_011242836.1	DUF1350 family protein
gene-H6G84_RS09915	0.329337	0.0691896	0.0951625	WP_011242837.1	2-succinylbenzoate--CoA ligase
gene-H6G84_RS09920	0.188861	0.243038	0.293288	WP_011242838.1	o-succinylbenzoate synthase
gene-H6G84_RS09925	-0.251341	0.107781	0.14092	WP_199290660.1	4-alpha-glucanotransferase
gene-H6G84_RS09930	-0.834407	4.76209e-06	1.25444e-05	WP_011242840.1	hypothetical protein
gene-H6G84_RS09935	0.35862	0.0228407	0.0342994	WP_011377832.1	YebC/PmpR family DNA-binding transcriptional regulator
gene-H6G84_RS09940	-0.861976	1.10348e-06	3.09553e-06	WP_011242842.1	chemotaxis protein CheW
gene-H6G84_RS09945	0.694434	3.54399e-06	9.47541e-06	WP_011242843.1	methyl-accepting chemotaxis protein
gene-H6G84_RS09950	0.119911	0.470106	0.523665	WP_011377831.1	hybrid sensor histidine kinase/response regulator
gene-H6G84_RS09955	-0.547802	0.00122055	0.00229142	WP_011377830.1	hypothetical protein
gene-H6G84_RS09960	0.440503	0.00960082	0.0155882	WP_011242845.1	response regulator transcription factor
gene-H6G84_RS09965	0.951657	3.76178e-09	1.41542e-08	WP_011377829.1	ATP-binding protein
gene-H6G84_RS09970	-0.281763	0.0619343	0.0857921	WP_011242847.1	rRNA pseudouridine synthase
gene-H6G84_RS09975	-0.402043	0.0188463	0.0287525	WP_011377828.1	helix-turn-helix domain-containing protein
gene-H6G84_RS09980	0.0319526	0.858628	0.878634	WP_011377827.1	formyltetrahydrofolate deformylase
gene-H6G84_RS09985	1.03055	9.30412e-08	2.99949e-07	WP_011242850.1	class II fumarate hydratase
gene-H6G84_RS09990	0.91798	6.58823e-08	2.15242e-07	WP_011242851.1	tetratricopeptide repeat protein
gene-H6G84_RS09995	0.14125	0.524088	0.576367	WP_011242852.1	HAD family phosphatase
gene-H6G84_RS10000	-0.41757	0.146218	0.186444	WP_011377826.1	cupin domain-containing protein
gene-H6G84_RS10005	-0.746031	3.13585e-07	9.55738e-07	WP_011377825.1	anthranilate synthase component I family protein
gene-H6G84_RS10010	-2.02049	9.6e-27	1.667e-25	WP_011377824.1	photosystem I reaction center subunit II
gene-H6G84_RS10015	-1.27999	1.78354e-20	1.8237e-19	WP_039756002.1	aspartate kinase
gene-H6G84_RS10020	-0.0178833	0.9664	0.972069	WP_011377822.1	endonuclease/exonuclease/phosphatase family protein
gene-H6G84_RS10025	-0.503234	0.0175631	0.0269945	WP_011377821.1	hypothetical protein
gene-H6G84_RS10030	1.34519	3.66411e-15	2.49775e-14	WP_011377820.1	ATP-dependent zinc metalloprotease FtsH
gene-H6G84_RS10035	-0.995495	1.3862e-08	4.91223e-08	WP_011242859.1	50S ribosomal protein L32
gene-H6G84_RS10040	0.126269	0.479466	0.533647	WP_231621322.1	hypothetical protein
gene-H6G84_RS10045	-0.781127	0.000168758	0.000357393	WP_011242861.1	DUF565 domain-containing protein
gene-H6G84_RS10050	0.0151272	0.926405	0.936543	WP_242016337.1	hypothetical protein
gene-H6G84_RS10055	0.124428	0.368799	0.423495	WP_011242863.1	DUF697 domain-containing protein
gene-H6G84_RS10060	-0.0987229	0.58716	0.63607	WP_011377816.1	hypothetical protein
gene-H6G84_RS10065	-0.622788	7.81841e-05	0.000173966	WP_011242865.1	proton extrusion protein PcxA
gene-H6G84_RS10070	-0.38265	0.0720023	0.0983652	WP_011242866.1	bifunctional adenosylcobinamide kinase/adenosylcobinamide-phosphate guanylyltransferase
gene-H6G84_RS10075	-0.963842	2.3074e-10	9.92219e-10	WP_011377815.1	hypothetical protein
gene-H6G84_RS10080	-0.8311	2.27469e-07	7.01253e-07	WP_011242868.1	DUF2488 family protein
gene-H6G84_RS10085	-0.827645	5.29779e-08	1.75653e-07	WP_011242869.1	transcriptional repressor
gene-H6G84_RS10090	0.0383061	0.828266	0.854465	WP_011242870.1	glycosyltransferase family 4 protein
gene-H6G84_RS10095	0.512889	0.000359268	0.000731874	WP_011242871.1	MFS transporter
gene-H6G84_RS10105	1.22992	1.04596e-15	7.45245e-15	WP_011242873.1	deoxyribose-phosphate aldolase
gene-H6G84_RS10110	1.25198	3.03314e-17	2.47738e-16	WP_011242874.1	hypothetical protein
gene-H6G84_RS10115	-0.523223	0.000949763	0.00181355	WP_011242875.1	DUF87 domain-containing protein
gene-H6G84_RS10120	0.34817	0.0920243	0.122349	NA	NA
gene-H6G84_RS10125	-1.23809	2.18739e-05	5.2793e-05	WP_011377814.1	LysE family translocator
gene-H6G84_RS10130	-1.25008	3.46265e-12	1.83329e-11	WP_011242877.1	DinB family protein
gene-H6G84_RS10135	-0.0611779	0.792724	0.824421	WP_039755778.1	hypothetical protein
gene-H6G84_RS10140	0.456295	0.00883346	0.0144122	WP_011242878.1	ferredoxin--NADP(+) reductase
gene-H6G84_RS10145	0.144935	0.441333	0.494907	WP_011242879.1	phosphoribulokinase
gene-H6G84_RS10150	0.49022	0.000367501	0.000745859	WP_011377813.1	CBS domain-containing protein
gene-H6G84_RS10155	-1.50567	3.39659e-11	1.58252e-10	WP_011242881.1	16S rRNA (cytosine(1402)-N(4))-methyltransferase RsmH
gene-H6G84_RS10165	0.442027	0.0255381	0.037967	WP_011242883.1	RidA family protein
gene-H6G84_RS10170	1.8069	9.47e-26	1.5197e-24	WP_039755781.1	DUF4912 domain-containing protein
gene-H6G84_RS10175	2.59245	6.88207e-36	2.1192e-34	WP_011242885.1	C-3'%2C4' desaturase CrtD
gene-H6G84_RS10180	2.85879	9.52948e-57	1.27647e-54	WP_011242886.1	dienelactone hydrolase family protein
gene-H6G84_RS10185	-0.749632	4.25233e-05	9.85466e-05	WP_039755782.1	hypothetical protein
gene-H6G84_RS10190	-0.681878	6.44081e-06	1.66072e-05	WP_011242887.1	hydroxymethylbilane synthase
gene-H6G84_RS10195	0.250436	0.0810625	0.109625	WP_011377808.1	hypothetical protein
gene-H6G84_RS10200	0.170223	0.243783	0.294054	WP_234910007.1	inositol monophosphatase family protein
gene-H6G84_RS10205	0.313263	0.0574554	0.0799185	WP_011242890.1	hypothetical protein
gene-H6G84_RS10215	1.36898	1.49608e-18	1.32785e-17	WP_011377807.1	16S rRNA (cytosine(967)-C(5))-methyltransferase
gene-H6G84_RS10220	-0.479967	0.00104383	0.0019875	WP_011377806.1	LCP family protein
gene-H6G84_RS10225	-0.187034	0.284716	0.336906	WP_199290662.1	ABC transporter ATP-binding protein
gene-H6G84_RS10230	-1.07639	2.83107e-14	1.78038e-13	WP_011242895.1	GTPase ObgE
gene-H6G84_RS10235	-0.0443437	0.815883	0.843981	WP_011242896.1	phosphoribosylglycinamide formyltransferase
gene-H6G84_RS10240	1.10853	6.78788e-14	4.06817e-13	WP_011242897.1	cob(I)yrinic acid a%2Cc-diamide adenosyltransferase
gene-H6G84_RS10245	1.15095	3.57417e-12	1.8886e-11	WP_011242898.1	GTP-binding protein
gene-H6G84_RS10250	0.135653	0.347636	0.402297	WP_011242899.1	hypothetical protein
gene-H6G84_RS10255	0.688498	1.38307e-06	3.83168e-06	WP_199290663.1	folate-binding protein YgfZ
gene-H6G84_RS10260	0.820156	2.37597e-05	5.69849e-05	WP_011242901.1	EVE domain-containing protein
gene-H6G84_RS10265	-0.484311	0.00322704	0.00566158	WP_011377804.1	PD-(D/E)XK nuclease family protein
gene-H6G84_RS10270	-0.74359	3.51954e-07	1.06541e-06	WP_011377803.1	carboxylating nicotinate-nucleotide diphosphorylase
gene-H6G84_RS10275	0.254087	0.101003	0.133032	WP_011242904.1	ABC transporter substrate-binding protein
gene-H6G84_RS10280	0.68254	1.75436e-05	4.31187e-05	WP_011242905.1	sugar ABC transporter permease
gene-H6G84_RS10285	0.439411	0.0036535	0.00635155	WP_011377802.1	carbohydrate ABC transporter permease
gene-H6G84_RS10290	-0.225531	0.133226	0.171181	WP_011242907.1	ABC transporter ATP-binding protein
gene-H6G84_RS10295	-1.85744	1.61257e-31	3.96338e-30	WP_011242908.1	NAD(P)/FAD-dependent oxidoreductase
gene-H6G84_RS10300	0.639929	0.00546488	0.00921361	WP_011242909.1	arsenosugar biosynthesis radical SAM protein ArsS
gene-H6G84_RS10305	-0.0712029	0.660541	0.702776	WP_011242910.1	bifunctional folylpolyglutamate synthase/dihydrofolate synthase
gene-H6G84_RS10310	-0.501891	0.00140144	0.00260364	WP_199290664.1	aspartate aminotransferase family protein
[truncated: 680 more rows]
